# Supplementary material for: Spatial-temporal trends and risk factors for undernutrition and obesity among children (<5 years) in South Africa, 2008–2017: findings from a nationally representative longitudinal panel survey
Source: PubMed Central journal article supplement (PMC7245449; doi:10.1136/bmjopen-2019-034476), 2020-04-08
Supplement: bmjopen-2019-034476.draft_revisions.pdf [file bmjopen-2019-034476.draft_revisions.pdf]

# BMJ Open

BMJ Open is committed to open peer review. As part of this commitment we make the peer review history of every article we publish publicly available.

When an article is published we post the peer reviewers' comments and the authors' responses online. We also post the versions of the paper that were used during peer review. These are the versions that the peer review comments apply to.

The versions of the paper that follow are the versions that were submitted during the peer review process. They are not the versions of record or the final published versions. They should not be cited or distributed as the published version of this manuscript.

BMJ Open is an open access journal and the full, final, typeset and author-corrected version of record of the manuscript is available on our site with no access controls, subscription charges or pay-per-view fees (<http://bmjopen.bmj.com>).

If you have any questions on BMJ Open's open peer review process please email [info.bmjopen@bmj.com](mailto:info.bmjopen@bmj.com)

# BMJ Open

## Spatial-temporal trends and risk factors for under-nutrition and obesity among children (<5 years) in South Africa, 2008-2017: findings from a nationally representative longitudinal panel survey

|                               |                                                                                                                                                                                                                                                                                                                                                                                                                                                                                                                                                                                                                                                                                                                                                                                            |
|-------------------------------|--------------------------------------------------------------------------------------------------------------------------------------------------------------------------------------------------------------------------------------------------------------------------------------------------------------------------------------------------------------------------------------------------------------------------------------------------------------------------------------------------------------------------------------------------------------------------------------------------------------------------------------------------------------------------------------------------------------------------------------------------------------------------------------------|
| Journal:                      | <i>BMJ Open</i>                                                                                                                                                                                                                                                                                                                                                                                                                                                                                                                                                                                                                                                                                                                                                                            |
| Manuscript ID                 | bmjopen-2019-034476                                                                                                                                                                                                                                                                                                                                                                                                                                                                                                                                                                                                                                                                                                                                                                        |
| Article Type:                 | Original research                                                                                                                                                                                                                                                                                                                                                                                                                                                                                                                                                                                                                                                                                                                                                                          |
| Date Submitted by the Author: | 26-Sep-2019                                                                                                                                                                                                                                                                                                                                                                                                                                                                                                                                                                                                                                                                                                                                                                                |
| Complete List of Authors:     | Sartorius, Benn; London School of Hygiene and Tropical Medicine Faculty of Infectious and Tropical Diseases, Disease Control<br>Sartorius, Kurt; University of KwaZulu-Natal, Public Health Medicine, School of Nursing and Public Health<br>Green, Rosemary; London School of Hygiene and Tropical Medicine, 2 Department of Population Health<br>Lutge, Elizabeth; South African Government Department, KwaZulu Natal Department of Health<br>Scheekbeek, Pauline; London School of Hygiene & Tropical Medicine, Epidemiology and Population Health<br>Tanser, Frank; Africa Centre for Health and Population Studies; University of KwaZulu-Natal<br>Dangour, Alan; London School of Hygiene & Tropical Medicine, Dept of Population Health<br>Slotow, Rob; University of KwaZulu-Natal |
| Keywords:                     | PUBLIC HEALTH, Community child health < PAEDIATRICS, NUTRITION & DIETETICS                                                                                                                                                                                                                                                                                                                                                                                                                                                                                                                                                                                                                                                                                                                 |
|                               |                                                                                                                                                                                                                                                                                                                                                                                                                                                                                                                                                                                                                                                                                                                                                                                            |

SCHOLARONE™  
Manuscripts

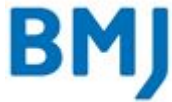

I, the Submitting Author has the right to grant and does grant on behalf of all authors of the Work (as defined in the below author licence), an exclusive licence and/or a non-exclusive licence for contributions from authors who are: i) UK Crown employees; ii) where BMJ has agreed a CC-BY licence shall apply, and/or iii) in accordance with the terms applicable for US Federal Government officers or employees acting as part of their official duties; on a worldwide, perpetual, irrevocable, royalty-free basis to BMJ Publishing Group Ltd ("BMJ") its licensees and where the relevant Journal is co-owned by BMJ to the co-owners of the Journal, to publish the Work in this journal and any other BMJ products and to exploit all rights, as set out in our [licence](#).

The Submitting Author accepts and understands that any supply made under these terms is made by BMJ to the Submitting Author unless you are acting as an employee on behalf of your employer or a postgraduate student of an affiliated institution which is paying any applicable article publishing charge ("APC") for Open Access articles. Where the Submitting Author wishes to make the Work available on an Open Access basis (and intends to pay the relevant APC), the terms of reuse of such Open Access shall be governed by a Creative Commons licence – details of these licences and which [Creative Commons](#) licence will apply to this Work are set out in our licence referred to above.

Other than as permitted in any relevant BMJ Author's Self Archiving Policies, I confirm this Work has not been accepted for publication elsewhere, is not being considered for publication elsewhere and does not duplicate material already published. I confirm all authors consent to publication of this Work and authorise the granting of this licence.

## Title page

# Spatial-temporal trends and risk factors for under-nutrition and obesity among children (<5 years) in South Africa, 2008-2017: findings from a nationally representative longitudinal panel survey

## Running title: under-nutrition and obesity among children in South Africa

Sartorius B<sup>1-3\*</sup>, Sartorius K<sup>2,4</sup>, Green R<sup>5</sup>, Lutge E<sup>2,6</sup>, Scheelbeek P<sup>5</sup>, Tanser F<sup>2,7-9</sup>, Dangour AD<sup>5</sup>, Slotow R<sup>10,11</sup>

1. Department of Disease Control, London School of Hygiene & Tropical Medicine, London, UK
2. Department of Public Health Medicine, School of Nursing and Public Health, University of KwaZulu-Natal, Durban, South Africa
3. Department of Health Metrics Sciences, School of Medicine, University of Washington, Seattle, USA
4. Faculty of Commerce, Law and Management, University of the Witwatersrand, Johannesburg, South Africa
5. Department of Population Health, London School of Hygiene & Tropical Medicine, London, UK
6. Health Research and Knowledge Management, KwaZulu-Natal Department of Health, KwaZulu-Natal, South Africa
7. Africa Health Research Institute (AHRI), KwaZulu-Natal, South Africa
8. Centre for the AIDS Programme of Research in South Africa (CAPRISA), University of KwaZulu-Natal, Durban, South Africa
9. Institute of Epidemiology and Health Care, University College London, London, United Kingdom
10. School of Life Sciences, University of Kwazulu-Natal, Pietermaritzburg Campus, South Africa
11. Department of Genetics, Evolution and Environment, University College, London, UK

\*Corresponding author: Dr Benn Sartorius; Address: Department of Disease Control, London School of Hygiene and Tropical Medicine, Keppel Street, Bloomsbury, London, WC1E7HT, United Kingdom; Tel.: +44 (0)207 927 2164; E-mail: benn.sartorius1@lshtm.ac.uk

**Word count: 4095**



## Summary

Objectives: To assess space-time trends in the burden of malnutrition and associated risk factors among children under 5 years of age in South Africa

Design: national panel survey

Setting: national, community based

Participants: Community based sample of children and adults. Sample size: 3,254 children in wave 1 (2008) to 4,710 children in wave 5 (2017).

Primary outcomes: Stunting, wasting/thinness and obesity among children (<5). Classification were based on anthropometric (height and weight) z-scores using WHO growth standards.

Results: Between 2008 and 2017 there was a significant decline nationally in stunting prevalence among children under 5 years of age from 11.0% to 7.6% ( $p=0.007$ ), while thinness/wasting (5.2% to 3.8%,  $p=0.131$ ) and obesity (14.5% to 12.9%,  $p=0.312$ ) decreased insignificantly. Stunting prevalence appears relatively evenly spread across South Africa, while obesity is more pronounced in the east of the country and thinness/wasting more pronounced in the west. Only 16/ 52 districts had an estimated wasting prevalence below the 2025 target threshold of 5% in 2017. African ethnicity, male gender, low birth weight, lower socio-economic and maternal/paternal education status and residence in a rural area were significantly associated with stunting. Children living in a lower income and food insecure household with young malnourished mothers were significantly more likely to be thin/wasted while African children, with higher birth weights, living in lower income households in KwaZulu-Natal and Eastern Cape were significantly more likely to be obese.

Conclusions: While improvements in stunting have been observed, thinness/wasting and obesity prevalence remain largely unchanged. The geographic and socio-demographic heterogeneity in childhood malnutrition has implications for equitable attainment of global nutritional targets for 2025. Many districts appeared to have dual epidemics of under and over nutrition (high within district heterogeneity and inequality). Effective public health planning and tailored interventions are required at the sub-national level to address this challenge.

**Keywords:** nutritional status, nutritional transition, undernutrition, obesity, children, South Africa

## Strengths and limitations of this study

- Utilises data from a nationally representative repeated panel data at individual/household level over a 10-year period (5 survey waves).
- Employed a fully Bayesian space-time shared component model to produce more stable estimates of malnutrition burden at provincial and district level among children under five years of age in South Africa.
- Panel design allows assessment of change in malnutrition burden within the same individuals/households observed at multiple time points.
- Missing or invalid weight/height measurements may have introduced selection bias if not missing at random, and may thus have affected both the internal validity and the representativeness the findings.
- As primary panel study was not designed/powerd for provincial and lower geographic level analysis, we cannot discount the resultant impact on precision/random variability when analysing at provincial/district level (administrative tier just below province) and further stratification by socio-demographic correlates.

## Background

Despite reductions in malnutrition 150.8 million children (22.2%) under five are stunted and a further 50.5 million children are wasted<sup>1</sup>. Furthermore rapidly rising trend in overweight and obesity in children and adults<sup>2-4 5</sup> has emerged as one of the most serious global public health issues of the 21<sup>st</sup> century<sup>6</sup>. Sub-Saharan Africa (SSA) has among the highest levels of child malnutrition<sup>1</sup> globally. This problem is particularly illustrated by South Africa<sup>7</sup>, a middle income country with high levels of wealth/economic inequality that is undergoing rapid socioeconomic and lifestyle changes that have precipitated a nutritional transition, high prevalence of overweight/obesity in children<sup>8</sup>. The dual burdens of undernutrition and overweight/obesity are not distributed in a spatially homogenous manner<sup>9</sup>, and the health risks associated with malnutrition vary by age, gender, ethnicity and geographical location<sup>10</sup>.

Progress to tackle all forms of child malnutrition remain much too slow<sup>1</sup>. In order to support the delivery of public health interventions that will be most effective at reducing malnutrition, an understanding of the geographical distribution of malnutrition is required. Limited data are collected at lower administrative unit level making it difficult to identify specific groups of high-risk individuals and thus, determine the most suitable and

---

<sup>1</sup> Child malnutrition is defined as a pathological state as a result of inadequate nutrition, including undernutrition due to insufficient intake of dietary energy and other key nutrients resulting in stunting (low height for age) or wasting (low weight-for-length) and overweight and obesity due to excessive consumption of dietary energy and reduced levels of physical activity.

1  
2  
3 cost-effective opportunities and solutions. Previous studies of nutritional status of the South African population  
4 have mostly focused on adults <sup>11 12</sup>. Here we use a large, nationally-representative data from multiple rounds of  
5 the National Income Dynamics Study over the period 2008 to 2017 to assess space-time trends in the burden of  
6 malnutrition and associated risk factors among children under 5 years of age in South Africa.  
7  
8  
9

## 10 11 **Methods**

### 12 13 **Data**

14  
15  
16  
17 Data were taken from the five panel (cross-sectional) waves of the South African National Income Dynamics  
18 Study (SA-NIDS)<sup>13</sup>, the first national panel study in South Africa. SA-NIDS was undertaken by the South African  
19 Labour and Development Research Unit based at the School of Economics at the University of Cape Town. The  
20 surveys took place in 2008, 2010-11, 2012, 2014-15 and 2017. These are named waves 1-5 respectively. A  
21 detailed description of the data collection methods can be found elsewhere <sup>26</sup>. In short, a stratified, two-stage  
22 random cluster sample design was employed to sample households for inclusion at baseline using proportionally  
23 allocated stratification, based on the 52 district councils (DCs) in South Africa. Within each DC (primary  
24 sampling unit [PSU]), clusters of dwelling units were systematically drawn <sup>14</sup>. The household level response rate  
25 was 69% and the individual response rate within households was 93%. Survey enumerators attempt to collect  
26 weight and height measurements of all individuals (including children) in selected households.  
27  
28  
29  
30  
31  
32  
33  
34  
35

### 36 37 **Study population**

38  
39 We restricted our analysis to children <5 years of age.  
40  
41

### 42 43 **Outcomes**

44  
45 We calculated height for age (HA) and BMI-for-age (BA) z-scores using the WHO 2007 growth standards <sup>15 16</sup>.  
46 We generated z-scores by transformation of child anthropometric data using the “lambda mu sigma” method  
47 (‘zanthro’ function in Stata 15). As recommended, weight-for-length was used in children 0 to <2 years of age,  
48 and BMI-for-age in children 2 years of age and older <sup>17</sup>. We defined obesity as weight-for-length z-score  $\geq +2$  for  
49 children under 2 years of age and BMI for age z-score of  $>+2$  for children age 2 and older <sup>17</sup>. We defined wasting  
50 as weight-for-length z-score  $< -2$  for children under 2 years of age and thinness as BMI for age z-score  $< -2$  for  
51 children 2 years and older. Stunting was defined as HA z-score of  $< -2$ .  
52  
53  
54  
55  
56  
57  
58  
59  
60

### **Geographic and socio-demographic variables**

1  
2  
3 To identify relevant inequalities under-nutrition and obesity indicators were stratified temporally (survey year),  
4 geographically (province and residence location type: urban informal settlements, urban formal, tribal/rural) and  
5  
6 by important socio-demographic categories (Gender: Female/Male; ethnicity: Black/African, Coloured,  
7  
8 Indian/Asian, White/Caucasian; Maternal: age; education status; body mass index; household socio-economic  
9  
10 status (income) classified into quantiles [1=lowest, 5=highest].  
11  
12

### 13 **Data analysis**

14  
15  
16 Analyses were performed using Stata software version 15 [StataCorp. 2017. Stata Statistical Software: Release 15.  
17  
18 College Station, TX: StataCorp LLC]. Clustering, as well as survey design effects, were accounted for using  
19  
20 sample weights to estimate standard error and 95% confidence intervals (CIs) around mean anthropometric z-  
21  
22 score point estimates, both overall and stratified by other socio-demographic variables such ethnicity and gender,  
23  
24 socio-economic status, and residence location type. Extrapolated population totals of malnourished children (< 5)  
25  
26 by yearly age were estimated using the survey weights.  
27

28 *Space-time Bayesian modelling:* Furthermore, we employed a Bayesian joint (shared component) space-time  
29  
30 binomial model<sup>18</sup> to estimate stable malnutrition prevalence rates at provincial and district levels across the 5  
31  
32 waves. The model splits the risk of malnutrition into three spatio-temporal components: a shared component for  
33  
34 all three malnutrition types (stunting, thinness/wasting and obesity) and two additional components that capture  
35  
36 that unshared differences between the three types. The model formulation contains an additive decomposition for  
37  
38 the shared part, space–time interaction terms common to the three malnutrition types and additional heterogeneity  
39  
40 terms. This methodology was employed in an attempt to stabilise estimates at district level given that the primary  
41  
42 sampling design was not developed to provide point estimates at this level of geographic disaggregation. Survey  
43  
44 weighted prevalence's were applied to sample size totals by district and panel to obtain a survey weighted  
45  
46 numerator count by malnutrition type in the binomial distribution. The joint space-time was fitted in WINBUGS  
47  
48 using Markov chain Monte Carlo (MCMC) simulation and non-informative priors. The full model code is  
49  
50 provided in the Supplementary Material (1). The model was run until the Monte Carlo error for each parameter of  
51  
52 interest was less than 5% of the sample standard deviation. Posterior prevalence estimates (and 95% Bayesian  
53  
54 credibility intervals) of undernutrition and obesity levels at provincial and district level were mapped using  
55  
56 ArcGIS 10.6.1 [ESRI 2011. ArcGIS Desktop: Release 10. Redlands, CA: Environmental Systems Research  
57  
58 Institute].  
59  
60

1  
2  
3 *Risk factors analysis:* Two-way tabulations of key socio-demographic covariates, year and child nutritional status  
4 were performed using the 'svy: tab' function to produce survey weighted prevalence estimates. Tests of  
5 independence for complex survey data survey (weighted Pearson's chi-square test) was utilised to assess the  
6 significance of bivariate associations between malnutrition burden and year as well as socio-demographic  
7 covariates.  
8  
9  
10  
11  
12

13 **Ethical approval:** Approval for the primary study was granted by the Ethics Committee of the University of Cape  
14 Town. The current analysis is a secondary data analysis of an open access dataset and does not require further  
15 ethical approval.  
16  
17  
18  
19

20 **Patient and Public Involvement:** As this was a data analysis utilising secondary data from a national community  
21 based panel survey, the development of the research question was not informed by the study subjects. Likewise,  
22 we could not involve study participants in the design of this study. Study participants were not involved in  
23 conduct of the primary study. Results will be disseminated in the form of peer reviewed article as well as through  
24 presentation to senior members of our National Department of Health and KwaZulu-Natal Department of Health.  
25  
26  
27  
28  
29

## 30 **Results**

### 31 **Study population**

32  
33 The sample of children <5 years of age in the 7,301 households included in the SA-NIDS survey increased from  
34 3,254 children at baseline (2008) to 4,710 children in wave 5 (2017) (Supplementary Material 2). With the  
35 exception of children under 1 year of age and survey wave 2 in 2010/11, valid weight and height measurements  
36 were taken from 85-90% of children sampled between the age of 1 and 5 on average.  
37  
38  
39  
40  
41  
42  
43  
44

### 45 **Temporal changes in burden of malnutrition from 2008 to 2017)**

46  
47 Between 2008 and 2017, the prevalence of stunting among children aged under 5 years decreased significantly  
48 from 11.0% to 7.6% ( $p=0.007$ ) (Table 1). Over the same period, both the prevalence of wasting/thinness (and the  
49 prevalence of obesity decreased non-significantly (from 5.2 to 3.8%,  $p=0.131$  and 14.5% to 12.9%,  $p=0.312$   
50 respectively). The prevalence of thinness was significantly ( $p<0.001$ ) higher in children under 2 years of age (8%  
51 in 2008; 6% in 2017) compared to 4% in 2008 and 3% in 2017 among children 2 years and older. The prevalence  
52 of obesity was also significantly ( $p<0.001$ ) higher among children under 2 years of age and increased over the  
53 study period (18.4% in 2008 vs 21.7 in 2017,  $p=0.331$ ).  
54  
55  
56  
57  
58  
59  
60

## Space-time burden of malnutrition at provincial and district level

*Under nutrition:* In 2008 and 2017, the highest prevalence of stunting was estimated in the Free State (17.1% and 10.5% respectively) followed by Eastern Cape (14.7% and 8.5% respectively) and Limpopo (14.0% and 9.3% respectively) (Figure 1 – panel a1). One district respectively in Free State (Mangaung Metropolitan), Limpopo (Vhembe) and Northern Cape (Pixley ka Seme) had an estimated stunting prevalence in excess of 15% in 2017 (Figure 1– panel a2). Gauteng had the highest burden of thinness/wasting in 2008 (9.6%) followed by North West province (9.3%) and Free State (7.6%) (Figure 2a). By 2017 the highest burden was observed in Western Cape (at 5.6%) followed by Northern Cape (4.9%) and North West (4.6%) (Figure 2b). The estimates suggest that at provincial level 7 of 9 provinces were above the 5% target threshold for wasting in 2017 (only Eastern Cape and KwaZulu-Natal were the exceptions). There appeared to be a general gradient of higher burden of thinness/wasting in the western half of country in 2017 (lower burden in KwaZulu-Natal and northern districts of Eastern Cape) (Figure 2b). The three highest wasting prevalence districts in 2017 were Amathole [EC] (12.6%), Siyanda [NC] (11.4%) and Eden [WC] (10.9%) (Figure 2b). Similarly, to the provincial level finding above, only 16 of 52 districts had an estimated wasting prevalence below 5% in 2017.

*Obesity:* In 2008, the highest prevalence of obesity was estimated in Eastern Cape (22.5%) followed by Western Cape (18.4%) and KwaZulu-Natal (17.6%) (Figure 3a). A decade later in 2017, the highest prevalence of childhood obesity was still estimated to be in the Eastern Cape (15.6%), followed by KwaZulu-Natal (15.1%) and Western Cape (15.0%). In contrast to the wasting gradient highlighted above (higher burden in the western half of the country), the burden of obesity in 2017 appeared to be much higher in the eastern half of the country (particularly KwaZulu-Natal and Eastern Cape) (Figure 3b). The 4 highest obesity prevalence districts in 2017 were located in KwaZulu-Natal (Sisonke [26.2%] and eThekweni Metropolitan [25.7%] and Eastern Cape (Buffalo City Metropolitan [29.1%] and O.R Tambo [25.9%]).

**Figure 1:** Bayesian posterior prevalence by province (and wave) and district level prevalence (equal intervals, 2017) of stunting among children <5 years

**Figure 2:** Bayesian posterior prevalence by province (and wave) and district level prevalence (equal intervals, 2017) thinness/wasting among children <5 years

**Figure 3:** Bayesian posterior prevalence by province (and wave) and district level prevalence (equal intervals, 2017) of obesity among children <5 years

### Factors associated with child nutritional status

A bivariate analysis of demographic, maternal, socio-economic and household factors at individual nutritional status level suggests that African ethnicity ( $p < 0.001$ ), male gender ( $p = 0.002$ ), low birth weight ( $< 0.001$ ), residing in lower socio-economic status household ( $p < 0.001$ ), province of residence ( $p = 0.012$ ), lower maternal/paternal education status ( $p < 0.001$ ,  $0.020$  respectively) and residence in a rural/tribal authority area ( $p < 0.001$ ) were significantly associated with stunting (Table 2). Children living in lower income households ( $p = 0.053$ ), lower food security (as measured through child hunger in last year) ( $p < 0.001$ ), province of residence ( $p = 0.002$ ), having a younger mother ( $< 20$ ) ( $p = 0.012$ ) and mother having a lower BMI classification ( $p = 0.005$ ) was significantly associated with thinness/wasting status. Children of African ethnicity ( $p < 0.001$ ), higher birth weight ( $p = 0.006$ ), living in lower income households ( $p = 0.001$ ) in KwaZulu-Natal and Eastern Cape ( $p < 0.001$ ) as well as paternal educational attainment ( $p = 0.033$ ) were significantly associated with obesity status (Table 2).

### Discussion

**Main findings:** The present study illustrates that while stunting has declined among South African children over the last 10 years, wasting and obesity appear largely unchanged, suggesting that development and public health interventions have had a variable impact. Stunting prevalence appears relatively evenly spread across South Africa, but obesity burden is more pronounced in the east of the country, whereas thinness/wasting is more pronounced in the west, with only 16 of 52 districts with estimated wasting prevalence below the 5% (WHO 2025 target threshold) in 2017. A concerning pattern observed was the increase prevalence of obesity in children under the age of two years. Key socio-demographic factors associated with malnutrition status were identified which likely underpins the spatial patterns (and heterogeneity) observed across the country. African children with lower birth weights residing in lower income households in rural areas with less educated mothers and fathers were particular more likely to be stunted. Children in lower income, food insecure households with malnourished young mothers appeared particularly more likely to be thin/wasted while African children, with higher birth weights, living in lower income households in KwaZulu-Natal and Eastern Cape were also more likely to be obese.. Furthermore, low household income appeared to be positively associated with all 3 nutritional types. Declining childhood stunting rates from 2008-2017 may well have resulted from government initiatives to support food security and child health (among other things), but our findings of distinct geographic and socio-demographic variability in undernutrition and obesity rates suggest that tackling malnutrition in South Africa is complex.



1  
2  
3 Models and targets for nationally-driven intervention need to be carefully specified according to local  
4 environments and socio-economic profiles.  
5  
6

7 **Contribution to existing literature:** Two previous studies in South Africa among primary school aged children  
8 dating back 25+ years (1993 and 1994 respectively) utilised cross sectional data<sup>19,20</sup>, thus limiting insight into  
9 temporal trends. Furthermore, the study by Jinabhai et al.<sup>19</sup> was restricted to KwaZulu-Natal limiting national  
10 representativeness. Another cross sectional study in South African in 2001-2003 among primary school children  
11 in five South African Provinces suggested that relative to 1993 prevalence of undernutrition had decreased while  
12 obesity had increased<sup>20,21</sup>. Thus these previous data are now outdated, were largely focused on primary school  
13 aged children as well as cross sectional in nature and geographically restricted.  
14  
15  
16  
17  
18  
19  
20  
21

22 This is also the first spatial-temporal Bayesian shared component analysis of malnutrition trends among children  
23 in South Africa utilising geographically representative repeated panel data over a 10-year period. The current  
24 study focusing on children under 5 year of age suggests that there is prominent geographic heterogeneity in  
25 malnutrition burden in South Africa in this youngest age group. This is in line with findings from other settings in  
26 Africa that have documented similar spatial heterogeneity<sup>22</sup> and persistence of these malnutrition inequalities has  
27 been demonstrated in an 80 country study further highlighting this ongoing public health conundrum<sup>23,24</sup>. Our  
28 results demonstrate a strong west to east gradient of higher underweight burden on the western side of South  
29 Africa and greater obesity on the eastern seaboard (Eastern Cape and KwaZulu-Natal). A map of poverty and  
30 inequality in South Africa<sup>2</sup> illustrates the co-existence of high levels of poverty and inequality in many parts of  
31 KwaZulu-Natal and the Eastern Cape with high levels of overweight/obesity. This is further confirmed by our  
32 individual child level analysis which suggested a significantly higher obesity prevalence in lower income  
33 households. Metropolitan areas displayed high levels of nutritional inequality that complement national studies of  
34 poverty and inequality<sup>25</sup>.  
35  
36  
37  
38  
39  
40  
41  
42  
43  
44  
45  
46

47 Under and over nutrition status appeared positively associated with lower household income classification. This  
48 finding of stunting and wasting disproportionately affecting the poor has been often demonstrated<sup>26</sup>. Other studies  
49 in Africa in particular have documented similar patterns i.e. children living in low SES households, children who  
50 live in peripheral areas and whose mothers had little or no schooling were at significantly higher risk of  
51 malnutrition<sup>27</sup>. The inconsistent challenges facing health authorities are occurring in the face of rapid urbanization  
52  
53  
54  
55  
56  
57  
58

59 <sup>2</sup> <https://southafrica-info.com/people/mapping-poverty-in-south-africa/>  
60



1  
2  
3 and industrialization that simultaneously attract both the rich and the poor to live in the same geographic districts  
4  
5 <sup>28</sup>. The heterogeneous geographic relationship between household income and undernutrition is also affected by the  
6  
7 allocation of household income that is a function of maternal education, access to markets, infrastructure and  
8  
9 sanitation <sup>29</sup>. Additionally, these data suggest that there is a strong and highly significant association between  
10  
11 higher food insecurity (child hunger frequency in the preceding year) and increased thinness/wasting. Community  
12  
13 and government based packages of support need to be highly targeted to the poorest and most food insecure  
14  
15 households to further reduce inequality in this regard and maximise reductions in malnutrition.

16  
17 Our findings suggest that children with low birth weight (due to pre-term delivery, fetal/intrauterine growth  
18  
19 restriction or a combination of the two) were significantly more likely to be stunted than normal weight babies and  
20  
21 this has been demonstrated in many other low and middle income settings (for example <sup>30</sup>). Socioeconomic  
22  
23 status/factors are known risk factors for LBW <sup>31</sup> and may in part explain the significant association found between  
24  
25 stunting and lower household income. South Africa has the higher number of incident and prevalent HIV  
26  
27 infections globally <sup>32</sup>. A further important contextual risk factor for LBW is maternal HIV status. A systematic  
28  
29 review and large observational studies focussing on low and middle income countries, suggest a strong and  
30  
31 significant association between maternal HIV infection and LBW <sup>33 34</sup>. Evidence from South Africa also suggests  
32  
33 the anthropometric z-score of HIV-infected children appear to be consistently lower when compared to HIV-  
34  
35 exposed but uninfected children <sup>35</sup>. We also observed a significantly higher prevalence of stunting among male  
36  
37 children which has been demonstrated previously in a meta-analysis for sub-Saharan Africa <sup>36</sup>, the suggested  
38  
39 cause of which might be that male children are more vulnerable to health inequalities relative to female children of  
40  
41 the same age. Strengthening community-based packages of care and community health worker (CHW)  
42  
43 performance/skills in rural and high burden geographies are key strategies to improve primary health care delivery  
44  
45 through better identification of women at higher risk of poor birth outcomes (e.g. HIV positive, history of previous  
46  
47 poor birth outcomes and/or currently malnourished), higher referral rates for facility births, and improved linkage  
48  
49 to other health as well as social services <sup>37</sup>. Lastly given the high adolescent fertility rates in many parts of South  
50  
51 Africa <sup>38</sup>, there is also much scope to improve CHW identification of households with higher risk malnourished  
52  
53 adolescent girls prior to pregnancy to ensure more optimal linkage to government and social support to ensure  
54  
55 adequate nutrition as well as improved awareness regarding family planning practices e.g. ensuring adequate birth  
56  
57 spacing <sup>39</sup>.

58  
59 Obesity in children has a complex aetiology that includes a wide range of socioeconomic, demographic,  
60  
environmental and cultural variables <sup>40</sup> such as household composition, mother's education, household income,

1  
2  
3 household size, environmental factors, rural versus urban location, and sanitation<sup>9 41</sup>. The high burden of obesity  
4 is likely associated with a progressive increases in the per capita food supply and consumption of high calorific  
5 foods (e.g. fat, sugar, fast and/or processed foods) in South Africa<sup>42</sup>. This rapidly changing dietary pattern has, in  
6 part, been attributed to urbanisation, growing and expanding supermarkets /formal food retailers, and the  
7 availability of fast/processed foods<sup>43</sup>. An interesting finding in these data was the significant positive association  
8 between child obesity status and residing in a lower income household. This association has been demonstrated  
9 previously<sup>44-46</sup> and this evidence base is growing. This conforms with the idea that lower and higher income  
10 households/families often have a higher obesity risk than middle income households i.e. so called U-shaped  
11 association. Lower income or economically deprived families often replace health fresh food options with cheaper  
12 and more calorific processed foods<sup>45</sup>. Multiple studies have demonstrated that the majority of low-income South  
13 Africans have a low dietary diversity, and, therefore, consume a limited food range consisting predominantly of a  
14 starchy staple such as bread and maize, with low intakes of vegetables and fruit<sup>42</sup>. Future work will characterise  
15 food purchasing patterns (and changes over time) among households in South Africa which will be compared with  
16 paired longitudinal anthropometric measurements to identify specific dietary patterns associated with child  
17 nutritional status.

18  
19  
20  
21  
22  
23  
24  
25  
26  
27  
28  
29  
30  
31  
32  
33  
34  
35  
36  
37  
38  
39  
40  
41  
42  
43  
44  
45  
46  
47  
48  
49  
50  
51  
52  
53  
54  
55  
56  
57  
58  
59  
60

Lastly and contextually, body mass is culturally influenced in South Africa, and the high level of obesity in  
KwaZulu-Natal and Eastern Cape may at least in part be a result of cultural beliefs that associate overweight with  
wealth and good health<sup>47</sup>. Geographic patterns of higher obesity in South Africa appeared to overlap areas of high  
poverty particular on the eastern side of the country<sup>3</sup> and thus not solely concentrated among higher socio-  
economic households.

**Strengths:** To our knowledge this is the first spatial-temporal analysis of malnutrition trends among children  
under five years of age in South Africa. We used standardised anthropometric measurements of children and their  
mothers from a nationally representative repeated panel data over a 10-year period. The panel nature of the design  
allows assessment of change in malnutrition burden within the same individuals/households observed at multiple  
time points. A further strength was the implementation of a fully Bayesian space-time shared component model to  
produce more stable joint estimates of malnutrition by province, district and year.

---

<sup>3</sup> <https://southafrica-info.com/people/mapping-poverty-in-south-africa/>

1  
2  
3 **Weaknesses:** The study has several limitations. Firstly, missing or invalid weight/height measurements (especially  
4 in wave 2, and among infants – Supplementary Material 2) may have introduced selection bias (if not missing at  
5 random), and may thus have affected both the internal validity and the representativeness the findings in the  
6 broader South African context. Secondly as the primary panel study was not designed/powerd for provincial  
7 and lower geographic level analysis, we cannot discount the resultant impact on precision/random variability  
8 when analysing at provincial/district level (administrative tier just below province) and further stratification by  
9 socio-demographic correlates. Thirdly, we cannot discount the effect of inter-observer variability across different  
10 study districts, despite extensive interviewer training and standardization of study protocols. All anthropometric  
11 measurements (e.g. weight, height) were taken in duplicate in NIDS <sup>26</sup> which would have ensured better  
12 reliability.  
13  
14  
15  
16  
17  
18  
19  
20  
21  
22

23 **Cost of malnutrition, policy and research needs:** Estimating the cost of child malnutrition in South Africa is  
24 extremely complicated and no locally-determined cost data exist. Data from the United States, suggest that the  
25 incremental lifetime direct medical cost for a 10-year-old obese child relative to a 10-year-old normal weight child  
26 ranges from USD 12 660 to USD 19 630 <sup>49</sup>. Estimates of the cost of treating wasted children are approximately  
27 USD 200 per child <sup>50</sup> while stunting has been consistently linked to worse economic outcomes in adulthood <sup>51</sup> and  
28 estimates suggest that, on average, the future per capita income penalty for a stunted individual could be as large  
29 as 9-10% in SSA <sup>52</sup>. Urgent investments are needed to accelerate the reduction of all forms of malnutrition, as  
30 well as to curb the obesity epidemic among young children in South Africa. There is also considerable evidence  
31 indicates that childhood wasting and stunting can be reduced by 60% and 20% respectively using ten nutrition-  
32 specific interventions <sup>53</sup>, with an estimated return on investment (ROI) of 18:1, i.e. for USD 1 spent on  
33 implementing effective programmes there would be USD 18 return in future economic benefits <sup>54</sup>. Very few  
34 obesity prevention interventions targeting children have been effective and a comprehensive multifaceted strategy  
35 tackling diet, physical inactivity, coupled with psychosocial support and local food environment change may  
36 prove more effective. Nutrition policies tackling child obesity must promote household nutrition security and  
37 healthy growth, decrease overconsumption of nutrient-poor foods, better shield children from increasingly  
38 pervasive marketing of energy-dense, nutrient-poor foods and sugar sweetened beverages as well as reduction of  
39 growing physical inactivity <sup>55</sup>.  
40  
41  
42  
43  
44  
45  
46  
47  
48  
49  
50  
51  
52  
53  
54  
55

56 Our findings suggest the need to implement evidence-based child health strategies and policy (e.g. further social  
57 grant support to vulnerable and impoverished households) that is tailored to specific geographies and socially  
58  
59  
60

1  
2  
3 disadvantaged sub-populations. Integrated nutrition programs in low and middle income countries (LMIC) have  
4 had a substantial impact on child nutrition and health via a combination of multisector targeted interventions <sup>56</sup>.  
5  
6 Furthermore implementation and/or strengthening of school-based food program can provide a launching pad for  
7  
8 preventive programs including education and awareness, provision of healthier/more nutrition food options and  
9  
10 micronutrient supplementation, deworming, increased immunization coverage and improved growth monitoring as  
11  
12 well as counselling <sup>56</sup>. This may be especially true of obese children where the highest prevalence was observed in  
13  
14 higher income households with higher food purchasing power and where local food environments are likely is  
15  
16 likely to be an important contextual determinant. A higher prevalence of child thinness/wasting among younger  
17  
18 mothers (<25) in poorer, food insecure household, highlights the importance of policies that enable younger  
19  
20 mothers to adequately care for their children in all settings.  
21  
22

### 23 **Conclusions**

24  
25 The heterogeneity of malnutrition is a feature of spatial inequality and rapid urbanization that has manifested in  
26  
27 widening levels of inequality in South Africa's districts and a need to reassess where nutrition programmes need  
28  
29 to be further decentralised to the highest risk municipalities and local communities to maximise effectiveness.  
30  
31 This work provides the first district level ranking of childhood overweight, thinness/wasting and stunting and  
32  
33 allows a differentiated pro-active tailored intervention to be developed for each municipal district. The dual  
34  
35 epidemic of undernutrition and overweight/obesity requires differential geographical policy inputs in metropolitan  
36  
37 areas and districts across the rural-urban divide. The current and future health cost of malnutrition among South  
38  
39 African children cannot be overstated. There is an urgent need to address nutrition problems among preschool  
40  
41 aged children in South Africa and other low and middle income countries. Effective public health planning and  
42  
43 geographically/contextually tailored interventions are required at sub-national level to address this challenge. The  
44  
45 analytical framework employed in this study we believe will have definite utility in other settings.  
46  
47

### 48 **References**

- 49  
50  
51 1. Development Initiatives. 2018 Global Nutrition Report: Shining a light to spur action on nutrition. Bristol, UK:  
52 Development Initiatives, 2018.  
53 2. Finucane MM, Stevens G, Cowan M, et al. Global Burden of Metabolic Risk Factors of Chronic Diseases  
54 Collaborating Group (Body Mass Index) National, regional, and global trends in body-mass index since  
55 1980: systematic analysis of health examination surveys and epidemiological studies with 960 country-  
56 years and 9.1 million participants. *Lancet* 2011;377(9765):557-67.  
57 3. Collaborators TGO. Health Effects of Overweight and Obesity in 195 Countries over 25 Years. *New England*  
58 *Journal of Medicine*;0(0):null. doi: 10.1056/NEJMoa1614362  
59 4. Collaboration NRF. Trends in adult body-mass index in 200 countries from 1975 to 2014: a pooled analysis of  
60 1698 population-based measurement studies with 19· 2 million participants. *The Lancet*  
2016;387(10026):1377-96.

5. Bleich SN, Vercammen KA, Zatz LY, et al. Interventions to prevent global childhood overweight and obesity: a systematic review. *The Lancet Diabetes & Endocrinology* 2017
6. Malik VS, Willett WC, Hu FB. Global obesity: trends, risk factors and policy implications. *Nature Reviews Endocrinology* 2013;9(1):13-27.
7. Bain LE, Awah PK, Geraldine N, et al. Malnutrition in Sub-Saharan Africa: burden, causes and prospects. *Pan African Medical Journal* 2013;15(1)
8. Rossouw HA, Grant CC, Viljoen M. Overweight and obesity in children and adolescents: The South African problem. *South African journal of science* 2012;108(5-6):31-37.
9. Keino S, Plasqui G, Ettyang G, et al. Determinants of stunting and overweight among young children and adolescents in sub-Saharan Africa. *Food and nutrition bulletin* 2014;35(2):167-78.
10. Osgood-Zimmerman A, Milleer AI, Stubbs RW, et al. Mapping child growth failure in Africa between 2000 and 2015. *Nature* 2018;555(7694):41.
11. Cois A, Day C. Obesity trends and risk factors in the South African adult population. *BMC obesity* 2015;2(1):42.
12. Sartorius B, Veerman LJ, Manyema M, et al. Determinants of obesity and associated population attributability, South Africa: Empirical evidence from a national panel survey, 2008-2012. *PloS one* 2015;10(6):e0130218.
13. COOVADIA H, BLAND R, TOLLMAN SM, et al. Implications of mortality transition for primary health care in rural South Africa: a population-based surveillance study. Commentary. *Lancet* 2008;372(9642)
14. Sartorius BK, Chersich MF, Mwaura M, et al. Maternal anaemia and duration of zidovudine in antiretroviral regimens for preventing mother-to-child transmission: a randomized trial in three African countries. *BMC infectious diseases* 2013;13(1):1.
15. Health WHONf. WHO child growth standards: growth velocity based on weight, length and head circumference: methods and development: World Health Organization 2009.
16. Organization WH, Health WHONf. WHO child growth standards: head circumference-for-age, arm circumference-for-age, triceps skinfold-for-age and subscapular skinfold-for-age: methods and development: World Health Organization 2007.
17. Gibson RS. Principles of nutritional assessment: Oxford university press, USA 2005.
18. Richardson S, Abellan JJ, Best N. Bayesian spatio-temporal analysis of joint patterns of male and female lung cancer risks in Yorkshire (UK). *Statistical methods in medical research* 2006;15(4):385-407.
19. Zere E, McIntyre D. Inequities in under-five child malnutrition in South Africa. *International journal for equity in health* 2003;2(1):7.
20. Jinabhai C, Taylor M, Sullivan K. Implications of the prevalence of stunting, overweight and obesity amongst South African primary school children: a possible nutritional transition? *European journal of clinical nutrition* 2003;57(2):358.
21. Armstrong ME, Lambert MI, Lambert EV. Secular trends in the prevalence of stunting, overweight and obesity among South African children (1994–2004). *European journal of clinical nutrition* 2011;65(7):835.
22. Kandala N-B, Madungu TP, Emina JB, et al. Malnutrition among children under the age of five in the Democratic Republic of Congo (DRC): does geographic location matter? *BMC public health* 2011;11(1):261.
23. Bredenkamp C, Buisman LR, Van de Poel E. Persistent inequalities in child undernutrition: evidence from 80 countries, from 1990 to today. *International Journal of Epidemiology* 2014;43(4):1328-35.
24. Di Cesare M, Bhatti Z, Soofi SB, et al. Geographical and socioeconomic inequalities in women and children's nutritional status in Pakistan in 2011: an analysis of data from a nationally representative survey. *The Lancet Global Health* 2015;3(4):e229-e39.
25. Ataguba JE, Akazili J, McIntyre D. Socioeconomic-related health inequality in South Africa: evidence from General Household Surveys. *International journal for equity in health* 2011;10(1):48.
26. Van de Poel E, Hosseinpoor AR, Speybroeck N, et al. Socioeconomic inequality in malnutrition in developing countries. *Bulletin of the World Health Organization* 2008;86:282-91.
27. Delpeuch F, Traissac P, Martin-Prével Y, et al. Economic crisis and malnutrition: socioeconomic determinants of anthropometric status of preschool children and their mothers in an African urban area. *Public health nutrition* 2000;3(1):39-47.
28. Oyvat C. Agrarian structures, urbanization, and inequality. *World Development* 2016;83:207-30.
29. Hoddinott J, Haddad L. Does female income share influence household expenditures? Evidence from Côte d'Ivoire. *oxford Bulletin of Economics and Statistics* 1995;57(1):77-96.
30. Aryastami NK, Shankar A, Kusumawardani N, et al. Low birth weight was the most dominant predictor associated with stunting among children aged 12–23 months in Indonesia. *BMC Nutrition* 2017;3(1):16.
31. de Bernabé JV, Soriano T, Albaladejo R, et al. Risk factors for low birth weight: a review. *European Journal of Obstetrics & Gynecology and Reproductive Biology* 2004;116(1):3-15.



- 1  
2  
3 32. Frank TD, Carter A, Jahagirdar D, et al. Global, regional, and national incidence, prevalence, and mortality of  
4 HIV, 1980–2017, and forecasts to 2030, for 195 countries and territories: a systematic analysis for the  
5 Global Burden of Diseases, Injuries, and Risk Factors Study 2017. *The Lancet HIV* 2019
- 6 33. Xiao P-L, Zhou Y-B, Chen Y, et al. Association between maternal HIV infection and low birth weight and  
7 prematurity: a meta-analysis of cohort studies. *BMC pregnancy and childbirth* 2015;15(1):246.
- 8 34. Althabe F, Moore JL, Gibbons L, et al. Adverse maternal and perinatal outcomes in adolescent pregnancies:  
9 The Global Network’s Maternal Newborn Health Registry study. *Reproductive health* 2015;12(2):S8.
- 10 35. Patel D, Bland R, Coovadia H, et al. Breastfeeding, HIV status and weights in South African children: a  
11 comparison of HIV-exposed and unexposed children. *Aids* 2010;24(3):437-45.
- 12 36. Wamani H, Åström AN, Peterson S, et al. Boys are more stunted than girls in sub-Saharan Africa: a meta-  
13 analysis of 16 demographic and health surveys. *BMC pediatrics* 2007;7(1):17.
- 14 37. Redding S, Conrey E, Porter K, et al. Pathways community care coordination in low birth weight prevention.  
15 *Maternal and child health journal* 2015;19(3):643-50.
- 16 38. Statistics South Africa. Recorded live births 2012. [www.statssa.gov.za/publications/P0305/P03052011.pdf](http://www.statssa.gov.za/publications/P0305/P03052011.pdf).  
17 2012
- 18 39. Organization WH. WHA Global nutrition targets 2025: low birth weight policy brief. Geneva: WHO,  
19 2014.[Accessed on: June 1st, 2017].
- 20 40. Monasta L, Batty G, Cattaneo A, et al. Early-life determinants of overweight and obesity: a review of  
21 systematic reviews. *Obesity reviews* 2010;11(10):695-708.
- 22 41. Kruger R, Kruger H, Macintyre U. The determinants of overweight and obesity among 10-to 15-year-old  
23 schoolchildren in the North West Province, South Africa—the THUSA BANA (Transition and Health  
24 during Urbanisation of South Africans; BANA, children) study. *Public health nutrition* 2006;9(3):351-  
25 58.
- 26 42. Pereira LM. The future of South Africa’s food system: What is research telling us. *SA Food Lab South Africa*  
27 2014
- 28 43. McLachlan M, Landman A. Nutrition-sensitive agriculture—a South African perspective. *Food security*  
29 2013;5(6):857-71.
- 30 44. Brophy S, Cooksey R, Gravenor MB, et al. Risk factors for childhood obesity at age 5: analysis of the  
31 millennium cohort study. *BMC public health* 2009;9(1):467.
- 32 45. Brunt H, Lester N, Davies G, et al. Childhood overweight and obesity: is the gap closing the wrong way?  
33 *Journal of public health* 2008;30(2):145-52.
- 34 46. Kim TJ, von dem Knesebeck O. Income and obesity: what is the direction of the relationship? A systematic  
35 review and meta-analysis. *BMJ open* 2018;8(1):e019862.
- 36 47. Rossouw HA, Grant CC, Viljoen M. Overweight and obesity in children and adolescents: the South African  
37 problem: review article. *South African Journal of Science* 2012;108(5-6):1-7.
- 38 48. Leibbrandt M, Woolard I, de Villiers L. Methodology: Report on NIDS wave 1. *Technical paper* 2009;1
- 39 49. Finkelstein EA, Graham WCK, Malhotra R. Lifetime direct medical costs of childhood obesity. *Pediatrics*  
40 2014;ped. 2014-0063.
- 41 50. Horton S, Shekar M, Ajay M. Scaling up nutrition: What will it cost?: The World Bank 2009.
- 42 51. McGovern ME, Krishna A, Aguayo VM, et al. A review of the evidence linking child stunting to economic  
43 outcomes. *International journal of epidemiology* 2017;46(4):1171-91.
- 44 52. Sartorius K, Sartorius B, Winkler C, et al. 1. Abstract 2. Introduction 3. miRNA biogenesis, mRNA silencing  
45 and export into the extracellular space 3.1. Intracellular mRNA silencing 3.2. Extracellular mRNA  
46 silencing.
- 47 53. Vaivada T, Gaffey MF, Das JK, et al. Evidence-based interventions for improvement of maternal and child  
48 nutrition in low-income settings: what’s new? *Current Opinion in Clinical Nutrition & Metabolic Care*  
49 2017;20(3):204-10.
- 50 54. Hoddinott J, Alderman H, Behrman JR, et al. The economic rationale for investing in stunting reduction.  
51 *Maternal & Child Nutrition* 2013;9:69-82.
- 52 55. Lobstein T, Jackson-Leach R, Moodie ML, et al. Child and adolescent obesity: part of a bigger picture. *The*  
53 *lancet* 2015;385(9986):2510-20.
- 54 56. UNICEF. Progress for children: a report card on nutrition: Unicef 2006.

## Authors' contributions

1  
2  
3 All authors contributed to the conception and design of the study. BS performed the analysis and initial  
4 interpretation of the findings. BS drafted the manuscript. All authors reviewed and provided input to revise the  
5 manuscript. All authors gave final approval for submission.  
6  
7  
8

### 9 **Funding**

10  
11  
12 This study forms part of the Sustainable and Healthy Food Systems (SHEFS) project supported by the Wellcome  
13 Trust's Our Planet, Our Health programme (grant number 205200/Z/16/Z). The funders of the study had no role in  
14 study design, data collection, data analysis, data interpretation or writing of the report.  
15  
16  
17

### 18 **Competing interests**

19  
20  
21  
22 None declared.  
23

### 24 **Patient consent for publication**

25  
26  
27 Not required.  
28  
29

### 30 **Ethics approval**

31  
32  
33 This study utilised open access data and hence ethical approval was not necessary.  
34  
35

### 36 **Data availability statement**

37  
38  
39 Data are publically available at <https://www.datafirst.uct.ac.za/dataportal/index.php/catalog/NIDS/about>  
40  
41  
42  
43  
44  
45  
46  
47  
48  
49  
50  
51  
52  
53  
54  
55  
56  
57  
58  
59  
60

Tables

Table 1: Burden of stunting, thinness/wasting and obesity among children by age and survey round

| Survey wave | Age (in years)      | N (valid HAZ) | n (stunted) | Prop: Stunted i | Estimated Population stunted | N (valid BMIZ)                   | n (thin /wasted) | Prop: Thinness ii | Estimated Population thinness | n (obese)                  | Prop: obese iii | Estimated Population obese |                                  |
|-------------|---------------------|---------------|-------------|-----------------|------------------------------|----------------------------------|------------------|-------------------|-------------------------------|----------------------------|-----------------|----------------------------|----------------------------------|
| 8           | 2008                | 0             | 220         | 31              | 0.14 (0.09, 0.22)            | 153648 (81545, 273371)           | 180              | 21                | 0.12 (0.07, 0.2)              | 133882 (66374, 251867)     | 32              | 0.1 (0.06, 0.15)           | 107783 (59737, 185749)           |
| 9           |                     | 1             | 419         | 29              | 0.08 (0.05, 0.13)            | 91903 (48436, 164369)            | 386              | 24                | 0.06 (0.03, 0.11)             | 66566 (29263, 143661)      | 76              | 0.22 (0.16, 0.3)           | 253021 (159436, 383096)          |
| 10          |                     | 2             | 453         | 62              | 0.15 (0.1, 0.21)             | 159241 (96989, 250626)           | 419              | 10                | 0.03 (0.01, 0.07)             | 34613 (12484, 87598)       | 70              | 0.14 (0.1, 0.19)           | 148357 (93148, 227510)           |
| 11          |                     | 3             | 489         | 55              | 0.11 (0.08, 0.15)            | 111595 (69906, 172639)           | 470              | 19                | 0.04 (0.02, 0.07)             | 39715 (20205, 75821)       | 67              | 0.17 (0.12, 0.24)          | 176235 (104092, 284620)          |
| 12          |                     | 4             | 498         | 48              | 0.09 (0.06, 0.13)            | 93391 (54519, 154136)            | 461              | 25                | 0.05 (0.03, 0.08)             | 52031 (27083, 96623)       | 34              | 0.08 (0.05, 0.12)          | 80282 (45874, 135732)            |
| 13          |                     | 0-5           | 2079        | 225             | 0.11 (0.09, 0.13) iv         | 591550 (451494, 766049)          | 1916             | 99                | 0.05 (0.04, 0.07) iv          | 277743 (196715, 385904)    | 279             | 0.14 (0.12, 0.17) iv       | 778865 (599156, 996439)          |
| 14          | 2010/11             | 0             | 75          | 24              | 0.33 (0.16, 0.57)            | 289420 (114550, 577181)          | 69               | 7                 | 0.1 (0.04, 0.23)              | 88499 (30258, 228461)      | 22              | 0.39 (0.21, 0.61)          | 340820 (153454, 615984)          |
| 15          |                     | 1             | 236         | 20              | 0.06 (0.03, 0.11)            | 63995 (25204, 132218)            | 215              | 11                | 0.07 (0.03, 0.14)             | 69776 (25204, 173842)      | 52              | 0.29 (0.19, 0.41)          | 299127 (159624, 499489)          |
| 16          |                     | 2             | 340         | 61              | 0.22 (0.16, 0.29)            | 267019 (166414, 407708)          | 314              | 17                | 0.06 (0.03, 0.11)             | 76344 (35363, 155183)      | 72              | 0.22 (0.16, 0.29)          | 270818 (167454, 414761)          |
| 17          |                     | 3             | 427         | 52              | 0.11 (0.07, 0.16)            | 130531 (73921, 220389)           | 402              | 20                | 0.03 (0.02, 0.06)             | 39208 (16427, 85938)       | 78              | 0.16 (0.11, 0.23)          | 195314 (114988, 313258)          |
| 18          |                     | 4             | 422         | 62              | 0.17 (0.12, 0.24)            | 205730 (122130, 329629)          | 394              | 19                | 0.03 (0.02, 0.06)             | 39494 (17639, 84450)       | 65              | 0.17 (0.12, 0.24)          | 208842 (126152, 329629)          |
| 19          |                     | 0-5           | 1500        | 219             | 0.16 (0.13, 0.19)            | 862302 (633920, 1148376)         | 1394             | 74                | 0.05 (0.03, 0.07)             | 265877 (167080, 405309)    | 289             | 0.21 (0.17, 0.26)          | 1159133 (835398, 1565968)        |
| 20          | 2012                | 0             | 271         | 59              | 0.2 (0.14, 0.28)             | 181464 (108101, 288795)          | 250              | 38                | 0.2 (0.12, 0.3)               | 179118 (95658, 311389)     | 55              | 0.19 (0.12, 0.28)          | 169192 (94880, 284482)           |
| 21          |                     | 1             | 544         | 78              | 0.13 (0.09, 0.17)            | 132310 (80796, 207206)           | 538              | 27                | 0.08 (0.05, 0.13)             | 80862 (40842, 150046)      | 138             | 0.23 (0.18, 0.28)          | 234062 (157153, 334626)          |
| 22          |                     | 2             | 629         | 72              | 0.1 (0.07, 0.14)             | 116230 (68690, 187924)           | 629              | 49                | 0.05 (0.03, 0.07)             | 55866 (30861, 97391)       | 147             | 0.23 (0.18, 0.29)          | 269508 (176205, 392309)          |
| 23          |                     | 3             | 710         | 82              | 0.11 (0.08, 0.16)            | 142259 (82987, 232297)           | 692              | 29                | 0.03 (0.02, 0.06)             | 43898 (20928, 87296)       | 102             | 0.15 (0.11, 0.2)           | 191943 (117798, 297399)          |
| 24          |                     | 4             | 771         | 112             | 0.16 (0.12, 0.2)             | 221293 (142258, 330201)          | 762              | 30                | 0.03 (0.02, 0.05)             | 43556 (20731, 87406)       | 118             | 0.18 (0.14, 0.22)          | 250658 (167278, 362573)          |
| 25          |                     | 0-5           | 2925        | 403             | 0.13 (0.11, 0.16)            | 762303 (567517, 1001855)         | 2871             | 173               | 0.06 (0.05, 0.07)             | 328768 (230074, 458914)    | 560             | 0.19 (0.17, 0.22)          | 1112487 (853832, 1415525)        |
| 26          | 2014/15             | 0             | 434         | 74              | 0.12 (0.08, 0.18)            | 144201 (81319, 240730)           | 421              | 37                | 0.1 (0.06, 0.18)              | 123211 (59233, 240730)     | 78              | 0.17 (0.12, 0.23)          | 197209 (117461, 313223)          |
| 27          |                     | 1             | 801         | 53              | 0.06 (0.04, 0.08)            | 67916 (39433, 112566)            | 801              | 24                | 0.03 (0.01, 0.08)             | 39657 (9858, 101845)       | 169             | 0.23 (0.18, 0.28)          | 266780 (179421, 379240)          |
| 28          |                     | 2             | 785         | 65              | 0.08 (0.05, 0.12)            | 85985 (48668, 146305)            | 781              | 16                | 0.02 (0.01, 0.03)             | 16222 (6309, 39015)        | 128             | 0.16 (0.12, 0.22)          | 170803 (106348, 263349)          |
| 29          |                     | 3             | 853         | 82              | 0.08 (0.06, 0.11)            | 89857 (54478, 143034)            | 845              | 24                | 0.04 (0.02, 0.07)             | 40865 (18323, 86890)       | 79              | 0.12 (0.08, 0.15)          | 133857 (83637, 205862)           |
| 30          |                     | 4             | 899         | 67              | 0.06 (0.04, 0.09)            | 77887 (45801, 127320)            | 897              | 19                | 0.02 (0.01, 0.05)             | 30376 (12301, 71898)       | 56              | 0.06 (0.04, 0.11)          | 82300 (38662, 166265)            |
| 31          |                     | 0-5           | 3772        | 341             | 0.08 (0.06, 0.09)            | 441281 (327611, 581707)          | 3745             | 120               | 0.04 (0.03, 0.05)             | 213012 (130004, 333338)    | 510             | 0.14 (0.12, 0.17)          | 834444 (618820, 1098053)         |
| 32          | 2017                | 0             | 372         | 50              | 0.13 (0.08, 0.19)            | 125347 (68160, 218303)           | 357              | 32                | 0.12 (0.07, 0.2)              | 121396 (62270, 221478)     | 70              | 0.18 (0.12, 0.25)          | 174538 (104344, 278066)          |
| 33          |                     | 1             | 760         | 55              | 0.08 (0.05, 0.11)            | 95527 (56435, 153804)            | 742              | 23                | 0.03 (0.02, 0.07)             | 42416 (17767, 94222)       | 146             | 0.23 (0.19, 0.29)          | 285123 (194388, 403216)          |
| 34          |                     | 2             | 833         | 63              | 0.07 (0.05, 0.11)            | 94807 (54147, 158550)            | 830              | 20                | 0.03 (0.02, 0.07)             | 43976 (18786, 99279)       | 130             | 0.15 (0.12, 0.19)          | 191812 (127079, 280056)          |
| 35          |                     | 3             | 875         | 77              | 0.08 (0.05, 0.12)            | 99890 (54439, 175689)            | 872              | 14                | 0.02 (0.01, 0.06)             | 30726 (10888, 79204)       | 77              | 0.07 (0.05, 0.1)           | 88889 (54439, 138247)            |
| 36          |                     | 4             | 900         | 59              | 0.05 (0.04, 0.07)            | 57363 (34849, 91231)             | 899              | 23                | 0.03 (0.01, 0.05)             | 29923 (13628, 62962)       | 47              | 0.06 (0.04, 0.08)          | 63912 (36990, 105365)            |
| 37          |                     | 0-5           | 3740        | 304             | 0.08 (0.06, 0.09) iv         | 445295 (326192, 593240)          | 3700             | 112               | 0.04 (0.03, 0.05) iv          | 223236 (136790, 345514)    | 470             | 0.13 (0.11, 0.15) iv       | 758650 (583989, 964831)          |
| 38          | At last observation | 0-5           | 10711       | 1049            | 0.09 (0.08, 0.10)            | 1 397 020 (1 177 247, 1 616 793) | 10467            | 391               | 0.04 (0.03, 0.05)             | 560 806 (448 656, 672 957) | 1,438           | 0.14 (0.13, 0.16)          | 2 048 650 (1 722 242, 2 375 058) |

i: HAZ ≤ -2 SD; ii BMI for age z-score ≤ -2SD; iii BMI for age z-score ≥ +2SD

iv: Significance tests (survey weighted logistic regression) among children 0-5: stunting (2017 vs 2008) p=0.007; thinness/wasting (2017 vs 2008) p=0.131; obesity (2017 vs 2008) p=0.312



**Table 2:** Demographic, socio-economic and maternal factors associated with nutritional status among children under 5 years, 2008-2017

| Variable                                    | Category               | Stunted      |              | p-value          | Thin/wasted  |              | p-value          | Obese        |              | p-value          |
|---------------------------------------------|------------------------|--------------|--------------|------------------|--------------|--------------|------------------|--------------|--------------|------------------|
|                                             |                        | Yes (% col)  | No (% col)   |                  | Yes (% col)  | No (% col)   |                  | Yes (% col)  | No (% col)   |                  |
| Ethnicity                                   | African                | <b>0.939</b> | 0.871        | <b>&lt;0.001</b> | 0.885        | 0.876        | 0.858            | <b>0.929</b> | 0.866        | <b>&lt;0.001</b> |
|                                             | Coloured               | 0.053        | <b>0.074</b> |                  | 0.076        | 0.072        |                  | 0.051        | <b>0.076</b> |                  |
|                                             | Asian/Indian           | 0.003        | <b>0.012</b> |                  | 0.015        | 0.011        |                  | 0.003        | <b>0.013</b> |                  |
|                                             | White                  | 0.006        | <b>0.039</b> |                  | 0.025        | 0.037        |                  | 0.014        | <b>0.041</b> |                  |
| Gender                                      | Male                   | <b>0.562</b> | 0.496        | <b>0.002</b>     | 0.514        | 0.501        | 0.686            | 0.523        | 0.498        | 0.178            |
|                                             | Female                 | 0.438        | 0.504        |                  | 0.486        | 0.499        |                  | 0.477        | 0.502        |                  |
| Birthweight                                 | LBW (<2.5 kgs)         | <b>0.153</b> | 0.093        | <b>&lt;0.001</b> | <b>0.130</b> | 0.098        | 0.163            | 0.072        | <b>0.104</b> | <b>0.006</b>     |
|                                             | NBW (≥2.5 kgs)         | 0.847        | 0.907        |                  | 0.870        | 0.902        |                  | 0.928        | 0.896        |                  |
|                                             | HBW (≥4 kgs)           | N/A          |              |                  |              |              |                  | <b>0.056</b> | 0.040        | <b>0.037</b>     |
|                                             | Non-HBW (<4kgs)        | N/A          |              |                  |              |              |                  | 0.944        | 0.960        |                  |
| Income quantile                             | Lowest                 | <b>0.294</b> | 0.199        | <b>&lt;0.001</b> | <b>0.234</b> | 0.203        | 0.481            | 0.226        | 0.200        | 0.422            |
|                                             | Low                    | 0.205        | 0.187        |                  | <b>0.214</b> | 0.188        |                  | 0.203        | 0.186        |                  |
|                                             | Middle                 | 0.183        | 0.200        |                  | 0.169        | 0.201        |                  | 0.180        | 0.204        |                  |
|                                             | High                   | 0.197        | 0.186        |                  | 0.184        | 0.191        |                  | 0.182        | 0.192        |                  |
|                                             | Highest                | 0.122        | <b>0.229</b> |                  | 0.200        | 0.218        |                  | 0.209        | 0.218        |                  |
| Low monthly household income                | <R2500                 | <b>0.566</b> | 0.417        | <b>&lt;0.001</b> | <b>0.488</b> | 0.423        | <b>0.053</b>     | <b>0.481</b> | 0.416        | <b>0.001</b>     |
|                                             | ≥R2500                 | 0.434        | <b>0.583</b> |                  | 0.512        | 0.577        |                  | 0.519        | 0.584        |                  |
| Child hungry in last year (food security) i | Never                  | 0.689        | 0.697        | 0.505            | 0.512        | <b>0.704</b> | <b>&lt;0.001</b> | 0.707        | 0.693        | 0.645            |
|                                             | Seldom                 | 0.127        | 0.096        |                  | 0.111        | 0.097        |                  | 0.076        | 0.102        |                  |
|                                             | Sometimes              | 0.126        | 0.155        |                  | <b>0.317</b> | 0.148        |                  | 0.154        | 0.155        |                  |
|                                             | Often                  | 0.054        | 0.043        |                  | 0.052        | 0.042        |                  | 0.052        | 0.041        |                  |
|                                             | Always                 | 0.004        | 0.009        |                  | 0.007        | 0.009        |                  | 0.011        | 0.009        |                  |
| Province                                    | Eastern Cape           | <b>0.165</b> | 0.132        | <b>0.012</b>     | 0.075        | 0.137        | <b>0.002</b>     | <b>0.190</b> | 0.124        | <b>&lt;0.001</b> |
|                                             | Free State             | 0.066        | 0.050        |                  | 0.032        | 0.052        |                  | 0.045        | 0.052        |                  |
|                                             | Gauteng                | 0.188        | 0.236        |                  | <b>0.298</b> | 0.231        |                  | 0.173        | 0.246        |                  |
|                                             | KwaZulu-Natal          | 0.218        | 0.227        |                  | 0.161        | 0.228        |                  | <b>0.293</b> | 0.212        |                  |
|                                             | Limpopo                | <b>0.143</b> | 0.109        |                  | 0.129        | 0.113        |                  | 0.074        | 0.121        |                  |
|                                             | Mpumalanga             | 0.085        | 0.083        |                  | 0.096        | 0.082        |                  | 0.074        | 0.085        |                  |
|                                             | North West             | 0.055        | 0.050        |                  | 0.060        | 0.050        |                  | 0.038        | 0.053        |                  |
|                                             | Northern Cape          | 0.022        | 0.023        |                  | 0.033        | 0.022        |                  | 0.011        | 0.025        |                  |
| Western Cape                                | 0.060                  | 0.091        | 0.116        | 0.086            | 0.103        | 0.084        |                  |              |              |                  |
| Environment                                 | Rural/Tribal authority | <b>0.519</b> | 0.451        | <b>&lt;0.001</b> | 0.429        | 0.460        | 0.647            | 0.466        | 0.457        | 0.111            |
|                                             | Urban Informal         | 0.122        | 0.101        |                  | 0.100        | 0.102        |                  | <b>0.133</b> | 0.097        |                  |
|                                             | Urban Formal           | 0.359        | <b>0.448</b> |                  | 0.470        | 0.437        |                  | 0.402        | 0.446        |                  |
| Mother BMI                                  | Underweight            | <b>0.041</b> | 0.022        | <b>0.003</b>     | <b>0.051</b> | 0.023        | <b>0.005</b>     | 0.019        | 0.025        | 0.135            |
|                                             | Normal                 | <b>0.397</b> | 0.344        |                  | <b>0.418</b> | 0.348        |                  | 0.327        | 0.356        |                  |
|                                             | Overweight             | 0.268        | 0.273        |                  | 0.249        | 0.272        |                  | 0.260        | 0.273        |                  |
|                                             | Obese                  | 0.294        | <b>0.361</b> |                  | 0.282        | <b>0.357</b> |                  | <b>0.395</b> | 0.346        |                  |
| Mother age                                  | <20                    | 0.073        | 0.048        | 0.118            | <b>0.112</b> | 0.047        | <b>0.012</b>     | <b>0.057</b> | 0.049        | 0.311            |

|                  |           |              |              |                  |       |       |       |              |              |              |
|------------------|-----------|--------------|--------------|------------------|-------|-------|-------|--------------|--------------|--------------|
|                  | 20-24     | 0.271        | 0.292        |                  | 0.292 | 0.291 |       | <b>0.322</b> | 0.285        |              |
|                  | 25-34     | 0.470        | 0.461        |                  | 0.396 | 0.465 |       | 0.441        | <b>0.465</b> |              |
|                  | 35-44     | 0.171        | 0.183        |                  | 0.185 | 0.182 |       | 0.168        | <b>0.185</b> |              |
|                  | 45+       | 0.015        | 0.016        |                  | 0.015 | 0.016 |       | 0.012        | <b>0.017</b> |              |
| Mother education | None      | 0.004        | 0.002        | <b>&lt;0.001</b> | 0.004 | 0.002 | 0.540 | 0.001        | 0.002        | 0.111        |
|                  | Primary   | <b>0.762</b> | 0.621        |                  | 0.645 | 0.630 |       | 0.652        | 0.626        |              |
|                  | Secondary | 0.207        | <b>0.354</b> |                  | 0.326 | 0.344 |       | 0.314        | 0.349        |              |
|                  | Tertiary  | 0.028        | 0.024        |                  | 0.025 | 0.024 |       | 0.033        | 0.023        |              |
| Father education | None      | 0.003        | 0.003        | <b>0.020</b>     | 0.005 | 0.003 | 0.960 | 0.002        | 0.003        | <b>0.033</b> |
|                  | Primary   | <b>0.646</b> | 0.560        |                  | 0.565 | 0.556 |       | 0.584        | 0.551        |              |
|                  | Secondary | 0.275        | 0.389        |                  | 0.382 | 0.387 |       | 0.318        | 0.398        |              |
|                  | Tertiary  | 0.077        | 0.048        |                  | 0.048 | 0.055 |       | 0.097        | 0.047        |              |

i: only included in wave 1 questionnaire

1  
2  
3  
4  
5  
6  
7  
8  
9  
10  
11  
12  
13  
14  
15  
16  
17  
18  
19  
20  
21  
22  
23  
24  
25  
26  
27  
28  
29  
30  
31  
32  
33  
34  
35  
36  
37  
38  
39  
40  
41  
42  
43  
44  
45  
46  
47  
48  
49  
50  
51  
52  
53  
54  
55  
56  
57  
58  
59  
60

a1) Stunting prevalence province and survey wave

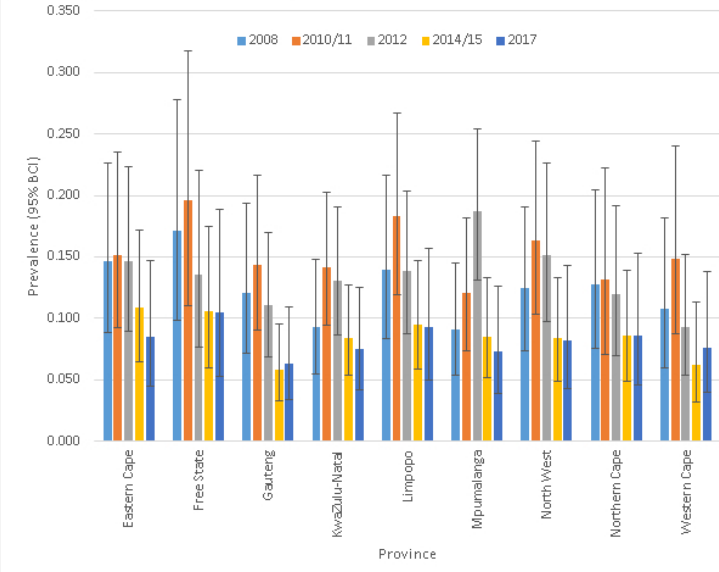

a2) Stunting prevalence by district in 2017

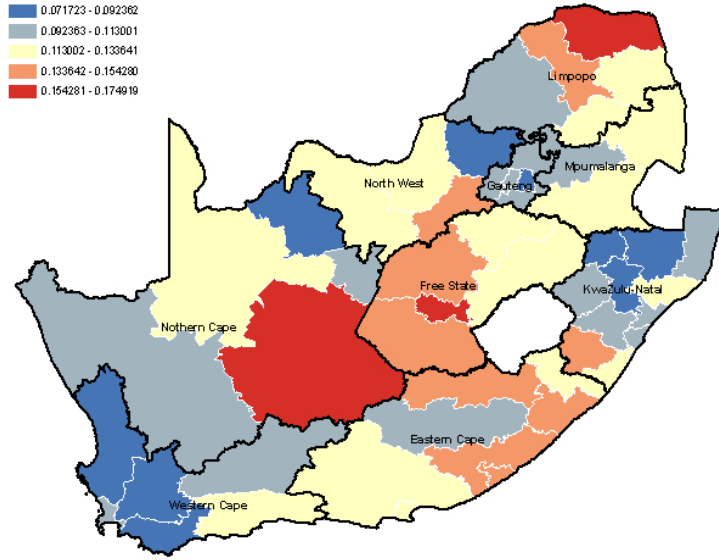

a1) Thinness/wasting prevalence province and survey wave

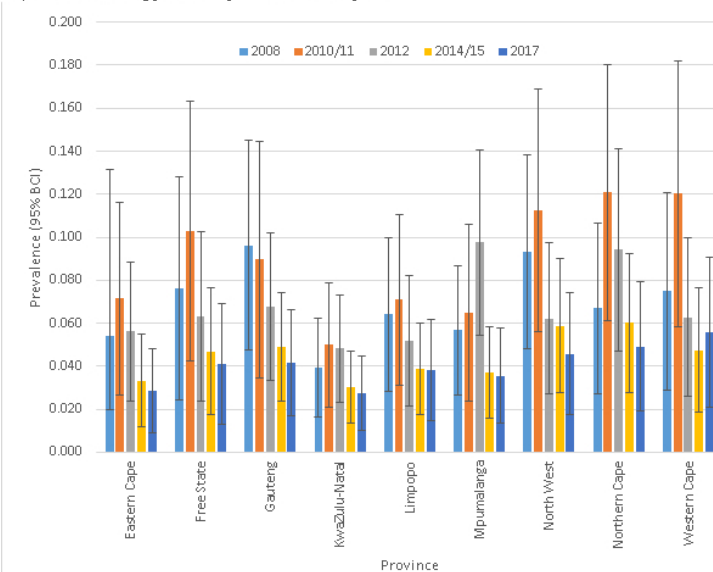

a2) Thinness/wasting prevalence by district in 2017

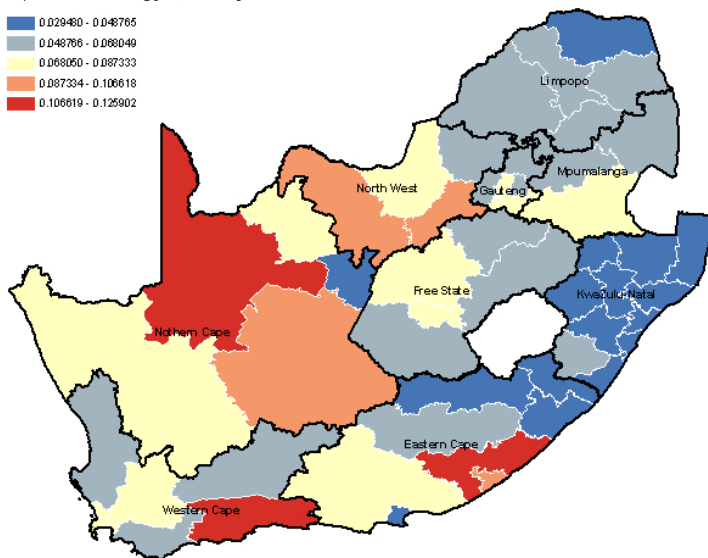

a1) Obesity prevalence province and survey wave

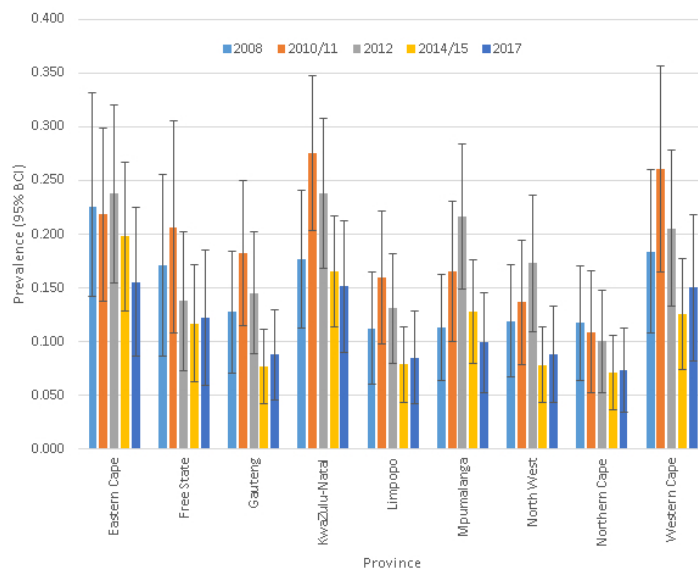

a2) Obesity prevalence by district in 2017

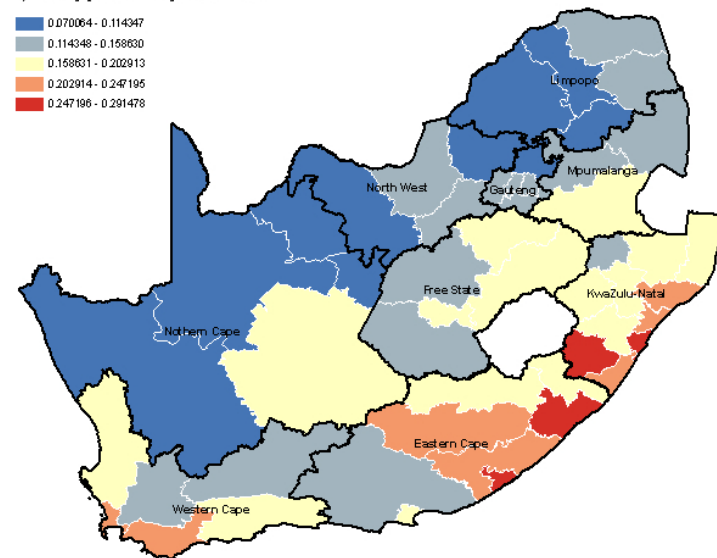

## Supplementary Material

### Supplementary 1: Win BUGS code for Bayesian joint (shared component) space-time binomial model

```

model
{
  ( i in 1 : N ) {
    for( j in 1 : T ) {
      #Likelihood

      stunted[i,j] ~ dbin(p1[i,j],tot[i,j])
      logit(p1[i,j])<-alpha1+mu[i,j,1]

      thin[i,j] ~ dbin(p2[i,j],tot[i,j])
      logit(p2[i,j])<-alpha2+mu[i,j,2]

      obese[i,j] ~ dbin(p3[i,j],tot[i,j])
      logit(p3[i,j])<-alpha3+mu[i,j,3]

      mu[i,j,1:3]~dmnorm(eta[i,j,],Sigma.inv[,])

      #Joint modelling
      eta[i,j,1]~lambda[i]*delta+xi[i]*kappa+nu[i,j]
      eta[i,j,2]~lambda[i]/delta+xi[i]/kappa+nu[i,j]+beta1[i]+gamma1[i]
      eta[i,j,3]~lambda[i]/delta+xi[i]/kappa+nu[i,j]+beta2[i]+gamma2[i]
    }
  }

  # - Space
  lambda[1:52]~car.normal(adj[],weights[],num[],tau.lambda)
  beta1[1:52]~car.normal(adj[],weights[],num[],tau.beta1)
  beta2[1:52]~car.normal(adj[],weights[],num[],tau.beta2)

  for(k in 1:240) {weights[k]<-1}

  # - Time:
  xi[1:T]~car.normal(adj.t[],weights.t[],num.t[],tau.xi)
  gamma1[1:T]~car.normal(adj.t[],weights.t[],num.t[],tau.gamma1)
  gamma2[1:T]~car.normal(adj.t[],weights.t[],num.t[],tau.gamma2)

  for(t in 1:1) {
    weights.t[t] <- 1;
    adj.t[t] <- t+1;
    num.t[t] <- 1
  }
  for(t in 2:(T-1)) {
    weights.t[2+(t-2)*2] <- 1;
    adj.t[2+(t-2)*2] <- t-1
    weights.t[3+(t-2)*2] <- 1;
    adj.t[3+(t-2)*2] <- t+1;
    num.t[t] <- 2
  }
  for(t in T:T) {
    weights.t[(T-2)*2 + 2] <- 1;
    adj.t[(T-2)*2 + 2] <- t-1;
    num.t[t] <- 1
  }

  #Space-time Interaction Modelling (priors)
  for(i in 1:N){
    for(j in 1:T){
      nu[i,j]~dnorm(0, tau.nu)
      RRnu[i,j]~exp(nu[i,j])
      prob.nu[i,j]~step(nu[i,j])
    }
  }

  #Hyperprior specification

  tau.lambda~dgamma(0.5, 0.0005)
  tau.xi~dgamma(0.5, 0.0005)
  tau.beta1~dgamma(0.5, 0.0005)
  tau.beta2~dgamma(0.5, 0.0005)
  tau.gamma1~dgamma(0.5, 0.0005)
  tau.gamma2~dgamma(0.5, 0.0005)
  tau.nu~dgamma(0.5, 0.0005)

  Sigma.inv[1:3,1:3]~dwish(B[,],3)
  log(delta)<-logdelta
  log(kappa)<-logkappa
  logdelta~dnorm(0,0.2)
  logkappa~dnorm(0,0.2)
  B[1,1]<-0.01
  B[2,2]<-0.01
  B[3,3]<-0.01
  B[1,2]<-0
  B[1,3]<-0
  B[2,1]<-0
  B[2,3]<-0
  B[3,1]<-0
  B[3,2]<-0

  alpha1~dflat()
  alpha2~dflat()
  alpha3~dflat()

```

## Supplementary 2: Description of the study sample across survey rounds

| Survey wave    | Age (in years) | Sampled | Estimated population size using survey weights | 95% CI  |         | % sampled with height/weight measurement |
|----------------|----------------|---------|------------------------------------------------|---------|---------|------------------------------------------|
| <b>2008</b>    | 0              | 661     | 1092027                                        | 948199  | 1235854 | 35.9%                                    |
|                | 1              | 661     | 1151665                                        | 1009086 | 1294244 | 67.9%                                    |
|                | 2              | 670     | 1088458                                        | 960285  | 1216632 | 71.0%                                    |
|                | 3              | 642     | 1034244                                        | 902011  | 1166477 | 81.0%                                    |
|                | 4              | 620     | 1016227                                        | 882185  | 1150270 | 83.5%                                    |
|                | <5             | 3254    | 5382621                                        | 5005478 | 5759764 |                                          |
| <b>2010/11</b> | 0              | 517     | 866786                                         | 720440  | 1013132 | 16.2%                                    |
|                | 1              | 621     | 1032184                                        | 840129  | 1224239 | 42.5%                                    |
|                | 2              | 751     | 1225419                                        | 1040085 | 1410753 | 49.3%                                    |
|                | 3              | 840     | 1206389                                        | 1026681 | 1386097 | 53.3%                                    |
|                | 4              | 820     | 1196800                                        | 1031500 | 1362101 | 53.3%                                    |
|                | <5             | 3549    | 5527578                                        | 4914106 | 6141050 |                                          |
| <b>2012</b>    | 0              | 652     | 902357                                         | 777704  | 1027010 | 45.1%                                    |
|                | 1              | 691     | 1039354                                        | 887868  | 1190839 | 87.7%                                    |
|                | 2              | 764     | 1183609                                        | 995508  | 1371711 | 87.6%                                    |
|                | 3              | 826     | 1257820                                        | 1036042 | 1479598 | 89.6%                                    |
|                | 4              | 909     | 1405034                                        | 1191438 | 1618631 | 87.3%                                    |
|                | <5             | 3842    | 5788174                                        | 5112765 | 6463583 |                                          |
| <b>2014/15</b> | 0              | 886     | 1185863                                        | 1003941 | 1367786 | 50.3%                                    |
|                | 1              | 875     | 1162949                                        | 985828  | 1340070 | 92.9%                                    |
|                | 2              | 863     | 1060232                                        | 901257  | 1219207 | 92.7%                                    |
|                | 3              | 914     | 1160946                                        | 985127  | 1336765 | 94.0%                                    |
|                | 4              | 960     | 1298110                                        | 1098342 | 1497879 | 94.3%                                    |
|                | <5             | 4498    | 5868101                                        | 5200170 | 6536031 |                                          |
| <b>2017</b>    | 0              | 813     | 987763                                         | 841487  | 1134040 | 47.8%                                    |
|                | 1              | 909     | 1215360                                        | 1045099 | 1385622 | 86.4%                                    |
|                | 2              | 996     | 1293408                                        | 1105038 | 1481779 | 84.6%                                    |
|                | 3              | 992     | 1264427                                        | 1088783 | 1440071 | 88.9%                                    |
|                | 4              | 1000    | 1129184                                        | 973431  | 1284937 | 90.4%                                    |
|                | <5             | 4710    | 5890142                                        | 5261158 | 6519126 |                                          |

# BMJ Open

## Spatial-temporal trends and risk factors for under-nutrition and obesity among children (<5 years) in South Africa, 2008-2017: findings from a nationally representative longitudinal panel survey

|                                 |                                                                                                                                                                                                                                                                                                                                                                                                                                                                                                                                                                                                                                                                                                                                                                                            |
|---------------------------------|--------------------------------------------------------------------------------------------------------------------------------------------------------------------------------------------------------------------------------------------------------------------------------------------------------------------------------------------------------------------------------------------------------------------------------------------------------------------------------------------------------------------------------------------------------------------------------------------------------------------------------------------------------------------------------------------------------------------------------------------------------------------------------------------|
| Journal:                        | <i>BMJ Open</i>                                                                                                                                                                                                                                                                                                                                                                                                                                                                                                                                                                                                                                                                                                                                                                            |
| Manuscript ID                   | bmjopen-2019-034476.R1                                                                                                                                                                                                                                                                                                                                                                                                                                                                                                                                                                                                                                                                                                                                                                     |
| Article Type:                   | Original research                                                                                                                                                                                                                                                                                                                                                                                                                                                                                                                                                                                                                                                                                                                                                                          |
| Date Submitted by the Author:   | 23-Dec-2019                                                                                                                                                                                                                                                                                                                                                                                                                                                                                                                                                                                                                                                                                                                                                                                |
| Complete List of Authors:       | Sartorius, Benn; London School of Hygiene and Tropical Medicine Faculty of Infectious and Tropical Diseases, Disease Control<br>Sartorius, Kurt; University of KwaZulu-Natal, Public Health Medicine, School of Nursing and Public Health<br>Green, Rosemary; London School of Hygiene and Tropical Medicine, 2 Department of Population Health<br>Lutge, Elizabeth; South African Government Department, KwaZulu Natal Department of Health<br>Scheelbeek, Pauline; London School of Hygiene & Tropical Medicine, Epidemiology and Population Health<br>Tanser, Frank; Africa Centre for Health and Population Studies; University of KwaZulu-Natal<br>Dangour, Alan; London School of Hygiene & Tropical Medicine, Dept of Population Health<br>Slotow, Rob; University of KwaZulu-Natal |
| <b>Primary Subject Heading</b>: | Nutrition and metabolism                                                                                                                                                                                                                                                                                                                                                                                                                                                                                                                                                                                                                                                                                                                                                                   |
| Secondary Subject Heading:      | Epidemiology, Public health                                                                                                                                                                                                                                                                                                                                                                                                                                                                                                                                                                                                                                                                                                                                                                |
| Keywords:                       | PUBLIC HEALTH, Community child health < PAEDIATRICS, NUTRITION & DIETETICS                                                                                                                                                                                                                                                                                                                                                                                                                                                                                                                                                                                                                                                                                                                 |
|                                 |                                                                                                                                                                                                                                                                                                                                                                                                                                                                                                                                                                                                                                                                                                                                                                                            |

SCHOLARONE™  
Manuscripts





I, the Submitting Author has the right to grant and does grant on behalf of all authors of the Work (as defined in the below author licence), an exclusive licence and/or a non-exclusive licence for contributions from authors who are: i) UK Crown employees; ii) where BMJ has agreed a CC-BY licence shall apply, and/or iii) in accordance with the terms applicable for US Federal Government officers or employees acting as part of their official duties; on a worldwide, perpetual, irrevocable, royalty-free basis to BMJ Publishing Group Ltd ("BMJ") its licensees and where the relevant Journal is co-owned by BMJ to the co-owners of the Journal, to publish the Work in this journal and any other BMJ products and to exploit all rights, as set out in our [licence](#).

The Submitting Author accepts and understands that any supply made under these terms is made by BMJ to the Submitting Author unless you are acting as an employee on behalf of your employer or a postgraduate student of an affiliated institution which is paying any applicable article publishing charge ("APC") for Open Access articles. Where the Submitting Author wishes to make the Work available on an Open Access basis (and intends to pay the relevant APC), the terms of reuse of such Open Access shall be governed by a Creative Commons licence – details of these licences and which [Creative Commons](#) licence will apply to this Work are set out in our licence referred to above.

Other than as permitted in any relevant BMJ Author's Self Archiving Policies, I confirm this Work has not been accepted for publication elsewhere, is not being considered for publication elsewhere and does not duplicate material already published. I confirm all authors consent to publication of this Work and authorise the granting of this licence.

1  
2  
3 1 **Title page**  
4  
5

6 2 **Spatial-temporal trends and risk factors for under-nutrition and obesity among children**  
7  
8 3 **(<5 years) in South Africa, 2008-2017: findings from a nationally representative**  
9  
10 4 **longitudinal panel survey**  
11  
12

13  
14 5 **Running title: under-nutrition and obesity among children in South Africa**  
15

16 6 Sartorius B<sup>1-3\*</sup>, Sartorius K<sup>2,4</sup>, Green R<sup>5</sup>, Lutge E<sup>2,6</sup>, Scheelbeek P<sup>5</sup>, Tanser F<sup>2,7-9</sup>, Dangour AD<sup>5</sup>, Slotow R<sup>10,11</sup>  
17  
18

- 19 7 1. Department of Disease Control, London School of Hygiene & Tropical Medicine, London, UK  
20  
21 8 2. Department of Public Health Medicine, School of Nursing and Public Health, University of KwaZulu-  
22  
23 9 Natal, Durban, South Africa  
24  
25 10 3. Department of Health Metrics Sciences, School of Medicine, University of Washington, Seattle, USA  
26  
27 11 4. Faculty of Commerce, Law and Management, University of the Witwatersrand, Johannesburg, South  
28  
29 12 Africa  
30  
31 13 5. Department of Population Health, London School of Hygiene & Tropical Medicine, London, UK  
32  
33 14 6. Health Research and Knowledge Management, KwaZulu-Natal Department of Health, KwaZulu-Natal,  
34  
35 15 South Africa  
36  
37 16 7. Africa Health Research Institute (AHRI), KwaZulu-Natal, South Africa  
38  
39 17 8. Centre for the AIDS Programme of Research in South Africa (CAPRISA), University of KwaZulu-Natal,  
40  
41 18 Durban, South Africa  
42  
43 19 9. Institute of Epidemiology and Health Care, University College London, London, United Kingdom  
44  
45 20 10. School of Life Sciences, University of Kwazulu-Natal, Pietermaritzburg Campus, South Africa  
46  
47 21 11. Department of Genetics, Evolution and Environment, University College, London, UK

48 22 \*Corresponding author: Dr Benn Sartorius; Address: Department of Disease Control, London School of Hygiene  
49  
50 23 and Tropical Medicine, Keppel Street, Bloomsbury, London, WC1E7HT, United Kingdom; Tel.: +44 (0)207 927  
51  
52 24 2164; E-mail: benn.sartorius1@lshtm.ac.uk  
53  
54

55 25 **Word count: 4095**  
56  
57  
58 26  
59  
60

## 27 **Summary**

28 Objectives: To assess space-time trends in the burden of malnutrition and associated risk factors among children  
29 under 5 years of age in South Africa

30 Design: national panel survey

31 Setting: national, community based

32 Participants: Community based sample of children and adults. Sample size: 3,254 children in wave 1 (2008) to  
33 4,710 children in wave 5 (2017).

34 Primary outcomes: Stunting, wasting/thinness and obesity among children (<5). Classification were based on  
35 anthropometric (height and weight) z-scores using WHO growth standards.

36 Results: Between 2008 and 2017 there was a larger decline nationally in stunting prevalence among children  
37 under 5 years of age from 11.0% to 7.6% (p=0.007), compared to thinness/wasting (5.2% to 3.8%, p=0.131) and  
38 obesity (14.5% to 12.9%, p=0.312). Stunting prevalence appears relatively evenly spread across South Africa,  
39 while obesity is more pronounced in the east of the country and thinness/wasting more pronounced in the west.  
40 Approximately 80% (41/ 52) of districts had an estimated wasting prevalence below the 2025 target threshold of  
41 5% in 2017. African ethnicity, male gender, low birth weight, lower socio-economic and maternal/paternal  
42 education status and residence in a rural area were significantly associated with stunting. Children living in a  
43 lower income and food insecure household with young malnourished mothers were significantly more likely to be  
44 thin/wasted while African children, with higher birth weights, living in lower income households in KwaZulu-  
45 Natal and Eastern Cape were significantly more likely to be obese.

46 Conclusions: While improvements in stunting have been observed, thinness/wasting and obesity prevalence  
47 remain largely unchanged. The geographic and socio-demographic heterogeneity in childhood malnutrition has  
48 implications for equitable attainment of global nutritional targets for 2025. Many districts appeared to have dual  
49 epidemics of under and over nutrition (high within district heterogeneity and inequality). Effective public health  
50 planning and tailored interventions are required at the sub-national level to address this challenge.

51 **Keywords:** nutritional status, nutritional transition, undernutrition, obesity, children, South Africa

## 52 **Strengths and limitations of this study**

- Utilises data from a nationally representative repeated panel data at individual/household level over a 10-year period (5 survey waves).
- Employed a fully Bayesian space-time shared component model to produce more stable estimates of malnutrition burden at provincial and district level among children under five years of age in South Africa.
- Panel design allows assessment of change in malnutrition burden within the same individuals/households observed at multiple time points.
- Missing or invalid weight/height measurements may have introduced selection bias if not missing at random, and may thus have affected both the internal validity and the representativeness the findings.
- As primary panel study was not designed/powerd for provincial and lower geographic level analysis, we cannot discount the resultant impact on precision/random variability when analysing at provincial/district level (administrative tier just below province) and further stratification by socio-demographic correlates.

## Background

Despite reductions in malnutrition 150.8 million children (22.2%) under five are stunted and a further 50.5 million children are wasted<sup>1</sup>. Furthermore rapidly rising trend in overweight and obesity in children and adults<sup>2-4 5</sup> has emerged as one of the most serious global public health issues of the 21<sup>st</sup> century<sup>6</sup>. Sub-Saharan Africa (SSA) has among the highest levels of child malnutrition<sup>1</sup> globally. This problem is particularly illustrated by South Africa<sup>7</sup>, a middle income country with high levels of wealth/economic inequality that is undergoing rapid socioeconomic and lifestyle changes that have precipitated a nutritional transition, high prevalence of overweight/obesity in children<sup>8</sup>. The dual burdens of undernutrition and overweight/obesity are not distributed in a spatially homogenous manner<sup>9</sup>, and the health risks associated with malnutrition vary by age, gender, ethnicity and geographical location<sup>10</sup>.

Progress to tackle all forms of child malnutrition remain much too slow<sup>1</sup>. In order to support the delivery of public health interventions that will be most effective at reducing malnutrition, an understanding of the geographical distribution of malnutrition is required. Limited data are collected at lower administrative unit level making it difficult to identify specific groups of high-risk individuals and thus, determine the most suitable and

---

<sup>1</sup> Child malnutrition is defined as a pathological state as a result of inadequate nutrition, including undernutrition due to insufficient intake of dietary energy and other key nutrients resulting in stunting (low height for age) or wasting (low weight-for-length) and overweight and obesity due to excessive consumption of dietary energy and reduced levels of physical activity.

1  
2  
3 79 cost-effective opportunities and solutions. Previous studies of nutritional status of the South African population  
4  
5 80 have mostly focused on adults<sup>11 12</sup>. Here we use a large, nationally-representative data from multiple rounds of  
6  
7 81 the National Income Dynamics Study over the period 2008 to 2017 to assess space-time trends in the burden of  
8  
9 82 malnutrition and associated risk factors among children under 5 years of age in South Africa.

## 11 83 **Methods**

### 14 84 **Data**

17 85 Data were taken from the five panel (cross-sectional) waves of the South African National Income Dynamics  
18  
19 86 Study (SA-NIDS)<sup>13 14</sup> (<http://www.nids.uct.ac.za/nids-data/data-access>;  
20  
21 87 <https://www.datafirst.uct.ac.za/dataportal/index.php/catalog/NIDS/>), the first national panel study in South Africa.  
22  
23 88 SA-NIDS was undertaken by the South African Labour and Development Research Unit based at the School of  
24  
25 89 Economics at the University of Cape Town. The surveys took place in 2008, 2010-11, 2012, 2014-15 and 2017.  
26  
27 90 These are named waves 1-5 respectively. A detailed description of the data collection methods can be found  
28  
29 91 elsewhere<sup>26</sup>. In short, a stratified, two-stage random cluster sample design was employed to sample households  
30  
31 92 for inclusion at baseline using proportionally allocated stratification, based on the 52 district councils (DCs) in  
32  
33 93 South Africa<sup>13</sup>. Within each DC (primary sampling unit [PSU]), clusters of dwelling units were systematically  
34  
35 94 drawn. The household level response rate was 69% and the individual response rate within households was 93%.  
36  
37 95 Survey enumerators attempt to collect weight and height measurements of all individuals (including children) in  
38  
39 96 selected households.

### 41 97 **Study population**

43 98 We restricted our analysis to children <5 years of age.

### 46 99 **Outcomes**

48 100 We calculated height for age (HA) and BMI-for-age (BA) z-scores using the WHO 2007 growth standards<sup>15 16</sup>.  
49  
50 101 We generated z-scores by transformation of child anthropometric data using the “lambda mu sigma” method  
51  
52 102 (‘zanthro’ function in Stata 15). As recommended, weight-for-length was used in children 0 to <2 years of age,  
53  
54 103 and BMI-for-age in children 2 years of age and older<sup>17</sup>. We defined obesity as weight-for-length z-score  $\geq +2$  for  
55  
56 104 children under 2 years of age and BMI for age z-score of  $>+2$  for children age 2 and older<sup>17</sup>. We defined wasting  
57  
58 105 as weight-for-length z-score  $< -2$  for children under 2 years of age and thinness as BMI for age z-score  $< -2$  for  
59  
60 106 children 2 years and older. Stunting was defined as HA z-score of  $< -2$ .

## Geographic and socio-demographic variables

To identify relevant inequalities under-nutrition and obesity indicators were stratified temporally (survey year), geographically (province and residence location type: urban informal settlements, urban formal, tribal/rural) and by important socio-demographic categories (Gender: Female/Male; ethnicity: Black/African, Coloured, Indian/Asian, White/Caucasian; Maternal: age; education status; body mass index; household socio-economic status (income) classified into quantiles [1=lowest, 5=highest]).

## Data analysis

Analyses were performed using Stata software version 15 [StataCorp. 2017. Stata Statistical Software: Release 15. College Station, TX: StataCorp LLC]. Given the multistage random sampling design of the primary study, clustering and survey design effects were accounted for using sample weights to estimate standard error and 95% confidence intervals (CIs) around mean anthropometric z-score point estimates, both overall and stratified by other socio-demographic variables such ethnicity and gender, socio-economic status, and residence location type. Extrapolated population totals of malnourished children (< 5) by yearly age were estimated using the survey weights.

*Space-time Bayesian modelling:* We assessed for the presence of univariate and bivariate spatial autocorrelation for the three anthropometric classifications using Moran's I statistics. This analysis was performed using GeoDa<sup>18</sup>. Based on these tests it appeared that there was no prominent bivariate spatial autocorrelation between the three measures but that each measure was significant heterogeneous across space to warrant the use of a spatial model (Supplementary Material 1).

We employed Bayesian spatial-temporal modelling approach in an attempt to stabilise estimates at district level given that the primary sampling design was not developed to provide point estimates at this level of geographic disaggregation and resultant zero prevalence estimates for particular districts and waves. We choose a Bayesian spatial-temporal formulation to model each of the anthropometric outcomes independently using an autoregressive approach, suggested by a recent methodological comparison<sup>19</sup>, which fuses ideas from autoregressive time series to link information in time and by spatial modelling to link information in space. We also opted for an autoregressive model which only included the spatial term for every period and did not include a heterogeneous term which resulted in a more parsimonious description of risk<sup>20</sup>.

Let  $Y_{ij}$  be the number of stunted, thin or obese children for the  $i$ th area and  $j$ th period,  $i = 1, \dots, I$ ,  $j = 1, \dots, J$ , and  $n_{ij}$  the total number of children sampled in a given area and period. We assumed that  $Y_{ij}$  follows a binomial distribution i.e.  $Y_{ij} \sim \text{binomial}(n_{ij}, \pi_{ij})$ ,  $i = 1, \dots, 53$ ,  $j = 1, \dots, 5$ , where  $\pi$  it is the risk (prevalence) of stunting, thinness or obesity in region  $i$  in period  $j$ . As per Martínez-Beneito et al.<sup>20</sup> we define the logit of the prevalence for a given anthropometric outcome for the first wave (or period) as the sum of an intercept and two random effects, namely:

$$\pi_{i1} = \mu + \alpha_i + (1 - \rho^2)^{-1/2} \cdot (\theta_{i1} + \phi_{i1}), \quad i = 1, \dots, I$$

$$\theta_{i1} \sim \text{Normal}(0, \sigma_\theta^2), \quad i = 1, \dots, I$$

$$\phi_1 = (\phi_{11}, \dots, \phi_{I1}) \sim \text{CAR.normal}(\sigma_\phi^2)$$

and subsequent time periods  $2, \dots, J$  as:

$$\pi_{ij} = \mu + \alpha_j + \rho \cdot (\pi_{i(j-1)} - \mu - \alpha_{j-1}) + \theta_{ij} + \phi_{ij}, \quad \text{for } i = 1, \dots, I \text{ and } j = 2, \dots, J$$

$$\theta_{ij} \sim \text{Normal}(0, \sigma_\theta^2), \quad \text{for } i = 1, \dots, I \text{ and } j = 2, \dots, J$$

$$\phi_j \sim \text{CAR.normal}(\sigma_\phi^2), \quad \text{for } j = 2, \dots, J$$

$$\alpha = (\alpha_1, \alpha_2, \dots, \alpha_J) \sim \text{CAR.normal}(\sigma_\alpha^2)$$

where  $\phi$ , the spatial random effect, assumes an intrinsic Gaussian conditionally autoregressive distribution<sup>21</sup> (abbreviated above as CAR.normal), whereby the spatially correlated random effect of the  $i$ th region ( $\phi_i$ ) is based on the sum of its weighted neighbourhood values. We used an adjacency matrix of common boundaries (neighbours) of a given region when modelling this parameter. The heterogeneous or unstructured random effect is represented by  $\theta$  and is included to ensure sufficient flexibility for estimates in close regions that is not captured by the spatially structured term. The spatial and heterogeneous random effect terms are both independent in time and mutually independent in every period. Furthermore,  $\rho$  corresponds to the temporal correlation term,  $\mu$  models the mean level of risks for all the periods and regions and  $\alpha_i$  models the mean deviation of the risks in the first period from the mean level for all of them. A first-order random walk CAR.normal was also used as prior distribution for  $\alpha$ .

The following prior distributions were assumed for the parameters defined above:

$$\sigma_\theta^2, \sigma_\phi^2, \sigma_\alpha^2 \sim \text{Gamma}(0.5, 0.0005)$$

$$\rho \sim \text{Uniform}(-1, 1)$$

$$\mu \sim \text{Normal}(0, C)$$



1  
2  
3 165 The prior distribution on the temporal correlation parameter ( $\rho$ ) was chosen to ensure the stationarity of the time  
4  
5 166 series, considering that it has an order 1 autoregressive structure. We chose inverse gamma distributions for the  
6  
7 167 variance parameters with values of 0.5 and 0.0005 as suggested by Wakefield et al<sup>22</sup>.

8  
9 168 Survey weighted prevalences were applied to sample size totals by district and panel to obtain a survey weighted  
10  
11 169 numerator counts ( $Y_{ij}$  above) by malnutrition type in the binomial distribution. The space-time models were fitted  
12  
13 170 in WINBUGS using Markov chain Monte Carlo (MCMC) simulation and non-informative priors. The full  
14  
15 171 WINBUGS model code is provided in the Supplementary Material (2). We used two-chain MCMC simulation for  
16  
17 172 parameter estimation and Gelman-Rubin statistics/plots<sup>23</sup> were used to assess model convergence/stability and  
18  
19 173 where the Monte Carlo error for each parameter of interest was less than 5% of the sample standard deviation  
20  
21 174 (Supplementary Material 3). For model validation, we firstly compared the observed and fitted prevalence values  
22  
23 175 to assess overall model adequacy and fit (using model Deviance Information Criterion [DIC] and comparison of  
24  
25 176 observed vs fitted prevalence estimate) and secondly, performed an out of sample validation using a random 10%  
26  
27 177 sample with observed data. These additional analyses can be found in the Supplementary Material 4. The model  
28  
29 178 was run until the Monte Carlo error for each parameter of interest was less than 5% of the sample standard  
30  
31 179 deviation. Posterior prevalence estimates and 95% Bayesian credibility intervals for stunting, thinness/wasting and  
32  
33 180 obesity at provincial and district level were mapped using ArcGIS 10.6.1 [ESRI 2011. ArcGIS Desktop: Release  
34  
35 181 10. Redlands, CA: Environmental Systems Research Institute].

36  
37 182 *Risk factors analysis:* Survey weighted two-way tabulations of key socio-demographic covariates, year and child  
38  
39 183 nutritional status were performed to produce correctly weighted prevalence estimates. Tests of independence for  
40  
41 184 complex survey data survey (weighted Pearson's chi-square test) was utilised to assess the significance of bivariate  
42  
43 185 associations between malnutrition burden and year as well as socio-demographic covariates.

44  
45 186 **Ethical approval:** Approval for the primary study was granted by the Ethics Committee of the University of Cape  
46  
47 187 Town. The current analysis is a secondary data analysis of an open access dataset and does not require further  
48  
49 188 ethical approval.

50  
51  
52 189 **Patient and Public Involvement:** As this was a data analysis utilising secondary data from a national community  
53  
54 190 based panel survey, the development of the research question was not informed by the study subjects. Likewise,  
55  
56 191 we could not involve study participants in the design of this study. Study participants were not involved in  
57  
58 192 conduct of the primary study. Results will be disseminated in the form of peer reviewed article as well as through  
59  
60 193 presentation to senior members of our National Department of Health and KwaZulu-Natal Department of Health.



## Results

### Study population

The sample of children <5 years of age in the 7,301 households included in the SA-NIDS survey increased from 3,254 children at baseline (2008) to 4,710 children in wave 5 (2017) (Supplementary Material 5). With the exception of children under 1 year of age and survey wave 2 in 2010/11, valid weight and height measurements were taken from 85-90% of children sampled between the age of 1 and 5 on average (Supplementary Material 5). An additional sensitivity analysis comparing distributions of various socio-demographic characteristics by missing weight/height status was also performed (Supplementary Section 6). These findings suggest that children with missing weight/height were largely missing at random, with the exception of age and province.

### Temporal changes in burden of malnutrition from 2008 to 2017)

Between 2008 and 2017, the prevalence of stunting among children aged under 5 years decreased from 11.0% to 7.6% ( $p=0.007$ ) (Table 1). Over the same period, both the prevalence of wasting/thinness (and the prevalence of obesity decreased (from 5.2 to 3.8%,  $p=0.131$  and 14.5% to 12.9%,  $p=0.312$  respectively). The prevalence of thinness was higher ( $p<0.001$ ) in children under 2 years of age (8% [95%CI: 5.0-11.8%] in 2008; 6% [95%CI: 4.1-9.1%] in 2017) compared to 4% (95%CI: 3.2-6.2%) in 2008 and 3% (95%CI: 2.0-4.5%) in 2017 among children 2 years and older. The prevalence of obesity was also higher among children under 2 years of age and increased over the study period (18.4% [95%CI: 13.7-24.1%] in 2008 vs 21.7% [95%CI: 19.3-24.2%] in 2017,  $p=0.091$ ).

### Space-time burden of malnutrition at provincial and district level

*Under nutrition:* In 2008 and 2017, the highest prevalence of stunting was estimated in the Free State (17.1% and 10.5% respectively) followed by Eastern Cape (14.7% and 8.5% respectively) and Limpopo (14.0% and 9.3% respectively) (Figure 1 – panel a1). One district each in Free State (Mangaung Metropolitan), Limpopo (Vhembe) and Northern Cape (Pixley ka Seme) had a posterior median smoothed prevalence of stunting in excess of 15% in 2017 (Figure 1– panel a2). Gauteng had the highest burden of thinness/wasting in 2008 (9.6%) followed by North West province (9.3%) and Free State (7.6%) (Figure 2a). By 2017 the highest burden was observed in Western Cape (at 5.6%) followed by Northern Cape (4.9%) and North West (4.6%) (Figure 2b). The estimates suggest that at provincial level 7 of 9 provinces were above the 5% target threshold for wasting in 2017 (only Eastern Cape and KwaZulu-Natal were the exceptions). There appeared to be a general gradient of higher burden

of thinness/wasting in the western half of country in 2017 (lower burden in KwaZulu-Natal and northern districts of Eastern Cape) (Figure 2b). The three districts with the highest posterior median smoothed prevalence of wasting in 2017 were Amathole [EC] (12.6%), Siyanda [NC] (11.4%) and Eden [WC] (10.9%) (Figure 2b). Similarly, to the provincial level finding above, only 16 of 52 districts had an estimated wasting prevalence below 5% in 2017.

*Obesity:* In 2008, the highest posterior median smoothed prevalence of obesity was estimated in Eastern Cape (22.5%) followed by Western Cape (18.4%) and KwaZulu-Natal (17.6%) (Figure 3a). A decade later in 2017, the highest prevalence of childhood obesity was still estimated to be in the Eastern Cape (15.6%), followed by KwaZulu-Natal (15.1%) and Western Cape (15.0%). In contrast to the wasting gradient highlighted above (higher burden in the western half of the country), the burden of obesity in 2017 appeared to be much higher in the eastern half of the country (particularly KwaZulu-Natal and Eastern Cape) (Figure 3b). The 4 highest obesity prevalence districts in 2017 were located in KwaZulu-Natal (Sisonke [26.2%] and eThekweni Metropolitan [25.7%] and Eastern Cape (Buffalo City Metropolitan [29.1%] and O.R Tambo [25.9%]).

**Figure 1:** Bayesian posterior median smoothed prevalence of stunting by province (and wave) and district level prevalence (equal intervals, 2017) among children <5 years

**Figure 2:** Bayesian posterior median smoothed prevalence of thinness/wasting by province (and wave) and district level prevalence (equal intervals, 2017) among children <5 years

**Figure 3:** Bayesian posterior median smoothed prevalence of obesity by province (and wave) and district level prevalence (equal intervals, 2017) among children <5 years

### Factors associated with child nutritional status

A bivariate analysis of demographic, maternal, socio-economic and household factors at individual nutritional status level suggests that African ethnicity ( $p<0.001$ ), male gender ( $p=0.002$ ), low birth weight ( $<0.001$ ), residing in lower socio-economic status household ( $p<0.001$ ), province of residence ( $p=0.012$ ), lower maternal/paternal education status ( $p<0.001$ , 0.020 respectively) and residence in a rural/tribal authority area ( $p<0.001$ ) were significantly associated with stunting (Table 2). Children living in lower income households ( $p=0.053$ ), lower food security (as measured through child hunger in last year) ( $p<0.001$ ), province of residence ( $p=0.002$ ), having a younger mother ( $<20$ ) ( $p=0.012$ ) and mother having a lower BMI classification ( $p=0.005$ ) was significantly

1  
2  
3 253 associated with thinness/wasting status. Children of African ethnicity ( $p<0.001$ ), higher birth weight ( $p=0.006$ ),  
4  
5 254 living in lower income households ( $p=0.001$ ) in KwaZulu-Natal and Eastern Cape ( $p<0.001$ ) as well as paternal  
6  
7 255 educational attainment ( $p=0.033$ ) were significantly associated with obesity status (Table 2).  
8  
9

## 10 256 **Discussion**

11  
12 257 **Main findings:** The present study illustrates that while stunting has declined among South African children over  
13  
14 258 the last 10 years, wasting and obesity appear largely unchanged, suggesting that development and public health  
15  
16 259 interventions have had a variable impact. Stunting prevalence appears relatively evenly spread across South  
17  
18 260 Africa, but obesity burden is more pronounced in the east of the country, whereas thinness/wasting is more  
19  
20 261 pronounced in the west, with only 16 of 52 districts with estimated wasting prevalence below the 5% (WHO 2025  
21  
22 262 target threshold) in 2017. A concerning pattern observed was the increase prevalence of obesity in children under  
23  
24 263 the age of two years. Key socio-demographic factors associated with malnutrition status were identified which  
25  
26 264 likely underpins the spatial patterns (and heterogeneity) observed across the country. African children with lower  
27  
28 265 birth weights residing in lower income households in rural areas with less educated mothers and fathers were  
29  
30 266 particular more likely to be stunted. Children in lower income, food insecure households with malnourished young  
31  
32 267 mothers appeared particularly more likely to be thin/wasted while African children, with higher birth weights,  
33  
34 268 living in lower income households in KwaZulu-Natal and Eastern Cape were also more likely to be obese.  
35  
36 269 Furthermore, low household income appeared to be positively associated with all 3 nutritional types. Declining  
37  
38 270 childhood stunting rates from 2008-2017 may well have resulted from government initiatives to support food  
39  
40 271 security and child health (among other things), but our findings of distinct geographic and socio-demographic  
41  
42 272 variability in undernutrition and obesity rates suggest that tackling malnutrition in South Africa is complex.  
43  
44 273 Models and targets for nationally-driven intervention need to be carefully specified according to local  
45  
46 274 environments and socio-economic profiles.

47  
48 275 **Contribution to existing literature:** Two previous studies in South Africa among primary school aged children  
49  
50 276 dating back 25+ years (1993 and 1994 respectively) utilised cross sectional data<sup>24,25</sup>, thus limiting insight into  
51  
52 277 temporal trends. Furthermore, the study by Jinabhai et al.<sup>19</sup> was restricted to KwaZulu-Natal limiting national  
53  
54 278 representativeness. Another cross sectional study in South African in 2001-2003 among primary school children  
55  
56 279 in five South African Provinces suggested that relative to 1993 prevalence of undernutrition had decreased while  
57  
58 280 obesity had increased<sup>25,26</sup>. Thus these previous data are now outdated, were largely focused on primary school  
59  
60 281 aged children as well as cross sectional in nature and geographically restricted.

1  
2  
3 282 This is also the first spatial-temporal Bayesian shared component analysis of malnutrition trends among children  
4  
5 283 in South Africa utilising geographically representative repeated panel data over a 10-year period. The current  
6  
7 284 study focusing on children under 5 year of age suggests that there is prominent geographic heterogeneity in  
8  
9 285 malnutrition burden in South Africa in this youngest age group. This is in line with findings from other settings in  
10  
11 286 Africa that have documented similar spatial heterogeneity<sup>27</sup> and persistence of these malnutrition inequalities has  
12  
13 287 been demonstrated in an 80 country study further highlighting this ongoing public health conundrum<sup>28 29</sup>. Our  
14  
15 288 results demonstrate a strong west to east gradient of higher underweight burden on the western side of South  
16  
17 289 Africa and greater obesity on the eastern seaboard (Eastern Cape and KwaZulu-Natal). A map of poverty and  
18  
19 290 inequality in South Africa<sup>2</sup> illustrates the co-existence of high levels of poverty and inequality in many parts of  
20  
21 291 KwaZulu-Natal and the Eastern Cape with high levels of overweight/obesity. This is further confirmed by our  
22  
23 292 individual child level analysis which suggested a significantly higher obesity prevalence in lower income  
24  
25 293 households. Metropolitan areas displayed high levels of nutritional inequality that complement national studies of  
26  
27 294 poverty and inequality<sup>30</sup>.

28  
29 295 Under and over nutrition status appeared positively associated with lower household income classification. This  
30  
31 296 finding of stunting and wasting disproportionately affecting the poor has been often demonstrated<sup>31</sup>. Other studies  
32  
33 297 in Africa in particular have documented similar patterns i.e. children living in low SES households, children who  
34  
35 298 live in peripheral areas and whose mothers had little or no schooling were at significantly higher risk of  
36  
37 299 malnutrition<sup>32</sup>. The inconsistent challenges facing health authorities are occurring in the face of rapid urbanization  
38  
39 300 and industrialization that simultaneously attract both the rich and the poor to live in the same geographic districts  
40  
41 301<sup>33</sup>. The heterogeneous geographic relationship between household income and undernutrition is also affected by the  
42  
43 302 allocation of household income that is a function of maternal education, access to markets, infrastructure and  
44  
45 303 sanitation<sup>34</sup>. Additionally, these data suggest that there is a strong and highly significant association between  
46  
47 304 higher food insecurity (child hunger frequency in the preceding year) and increased thinness/wasting. Community  
48  
49 305 and government based packages of support need to be highly targeted to the poorest and most food insecure  
50  
51 306 households to further reduce inequality in this regard and maximise reductions in malnutrition.

52  
53 307 Our findings suggest that children with low birth weight (due to pre-term delivery, fetal/intrauterine growth  
54  
55 308 restriction or a combination of the two) were significantly more likely to be stunted than normal weight babies and

56  
57  
58  
59 <sup>2</sup> <https://southafrica-info.com/people/mapping-poverty-in-south-africa/>

1  
2  
3  
4  
5  
6  
7  
8  
9  
10  
11  
12  
13  
14  
15  
16  
17  
18  
19  
20  
21  
22  
23  
24  
25  
26  
27  
28  
29  
30  
31  
32  
33  
34  
35  
36  
37  
38  
39  
40  
41  
42  
43  
44  
45  
46  
47  
48  
49  
50  
51  
52  
53  
54  
55  
56  
57  
58  
59  
60

this has been demonstrated in many other low and middle income settings (for example <sup>35</sup>). Socioeconomic status/factors are known risk factors for LBW <sup>36</sup>and may in part explain the significant association found between stunting and lower household income. South Africa has the higher number of incident and prevalent HIV infections globally <sup>37</sup>. A further important contextual risk factor for LBW is maternal HIV status. A systematic review and large observational studies focussing on low and middle incoming countries, suggest a strong and significant association between maternal HIV infection and LBW <sup>38 39</sup>. Evidence from South Africa also suggests the anthropometric z-score of HIV-infected children appear to be consistently lower when compared to HIV-exposed but uninfected children <sup>40</sup>. We also observed a significantly higher prevalence of stunting among male children which has been demonstrated previously in a meta-analysis for sub-Saharan Africa <sup>41</sup>, the suggested cause of which might be that male children are more vulnerable to health inequalities relative to female children of the same age. Strengthening community-based packages of care and community health worker (CHW) performance/skills in rural and high burden geographies are key strategies to improve primary health care delivery through better identification of women at higher risk of poor birth outcomes (e.g. HIV positive, history of previous poor birth outcomes and/or currently malnourished), higher referral rates for facility births, and improved linkage to other health as well as social services <sup>42</sup>. Lastly given the high adolescent fertility rates in many parts of South Africa <sup>43</sup>, there is also much scope to improve CHW identification of households with higher risk malnourished adolescent girls prior to pregnancy to ensure more optimal linkage to government and social support to ensure adequate nutrition as well as improved awareness regarding family planning practices e.g. ensuring adequate birth spacing <sup>44</sup>.

Obesity in children has a complex aetiology that includes a wide range of socioeconomic, demographic, environmental and cultural variables <sup>45</sup>such as household composition, mother's education, household income, household size, environmental factors, rural versus urban location, and sanitation <sup>9 46</sup>. The high burden of obesity is likely associated with a progressive increases in the per capita food supply and consumption of high calorific foods (e.g. fat, sugar, fast and/or processed foods) in South Africa<sup>47</sup>. This rapidly changing dietary pattern has, in part, been attributed to urbanisation, growing and expanding supermarkets /formal food retailers, and the availability of fast/processed foods <sup>48</sup>. An interesting finding in these data was the significant positive association between child obesity status and residing in a lower income household. This association has been demonstrated previously <sup>49-51</sup> and this evidence base is growing. This conforms with the idea that lower and higher income households/families often have a higher obesity risk than middle income households i.e. so called U-shaped association. Lower income or economically deprived families often replace health fresh food options with cheaper

1  
2  
3 339 and more calorific processed foods<sup>50</sup>. Multiple studies have demonstrated that the majority of low-income South  
4  
5 340 Africans have a low dietary diversity, and, therefore, consume a limited food range consisting predominantly of a  
6  
7 341 starchy staple such as bread and maize, with low intakes of vegetables and fruit<sup>47</sup>. Future work will characterise  
8  
9 342 food purchasing patterns (and changes over time) among households in South Africa which will be compared with  
10  
11 343 paired longitudinal anthropometric measurements to identify specific dietary patterns associated with child  
12  
13 344 nutritional status.

14  
15  
16 345 Lastly and contextually, body mass is culturally influenced in South Africa, and the high level of obesity in  
17  
18 346 KwaZulu-Natal and Eastern Cape may at least in part be a result of cultural beliefs that associate overweight with  
19  
20 347 wealth and good health<sup>52</sup>. Geographic patterns of higher obesity in South Africa appeared to overlap areas of high  
21  
22 348 poverty particular on the eastern side of the country<sup>3</sup> and thus not solely concentrated among higher socio-  
23  
24 349 economic households.

25 350 **Strengths:** To our knowledge this is the first spatial-temporal analysis of malnutrition trends among children  
26  
27 351 under five years of age in South Africa. We used standardised anthropometric measurements of children and their  
28  
29 352 mothers from a nationally representative repeated panel data over a 10-year period. The panel nature of the design  
30  
31 353 allows assessment of change in malnutrition burden within the same individuals/households observed at multiple  
32  
33 354 time points. A further strength was the implementation of a fully Bayesian space-time shared component model to  
34  
35 355 produce more stable joint estimates of malnutrition by province, district and year.

36  
37 356 **Weaknesses:** The study has several limitations. Firstly, missing or invalid weight/height measurements (especially  
38  
39 357 in wave 2, and among infants – Supplementary Material 2) may have introduced selection bias (if not missing at  
40  
41 358 random), and may thus have affected both the internal validity and the representativeness the findings in the  
42  
43 359 broader South African context. Secondly as the primary panel study was not designed/powerd for provincial  
44  
45 360 <sup>13</sup>and lower geographic level analysis, we cannot discount the resultant impact on precision/random variability  
46  
47 361 when analysing at provincial/district level (administrative tier just below province) and further stratification by  
48  
49 362 socio-demographic correlates. Thirdly, we cannot discount the effect of inter-observer variability across different  
50  
51 363 study districts, despite extensive interviewer training and standardization of study protocols. All anthropometric  
52  
53 364 measurements (e.g. weight, height) were taken in duplicate in NIDS<sup>26</sup> which would have ensured better  
54  
55 365 reliability.

56  
57  
58  
59 <sup>3</sup> <https://southafrica-info.com/people/mapping-poverty-in-south-africa/>



1  
2  
3 366 ***Cost of malnutrition, policy and research needs:*** Estimating the cost of child malnutrition in South Africa is  
4  
5 367 extremely complicated and no locally-determined cost data exist. Data from the United States, suggest that the  
6  
7 368 incremental lifetime direct medical cost for a 10-year-old obese child relative to a 10-year-old normal weight child  
8  
9 369 ranges from USD 12 660 to USD 19 630<sup>53</sup>. Estimates of the cost of treating wasted children are approximately  
10  
11 370 USD 200 per child<sup>54</sup> while stunting has been consistently linked to worse economic outcomes in adulthood<sup>55</sup> and  
12  
13 371 estimates suggest that, on average, the future per capita income penalty for a stunted individual could be as large  
14  
15 372 as 9-10% in SSA<sup>56</sup>. Urgent investments are needed to accelerate the reduction of all forms of malnutrition, as  
16  
17 373 well as to curb the obesity epidemic among young children in South Africa. There is also considerable evidence  
18  
19 374 indicates that childhood wasting and stunting can be reduced by 60% and 20% respectively using ten nutrition-  
20  
21 375 specific interventions<sup>57</sup>, with an estimated return on investment (ROI) of 18:1, i.e. for USD 1 spent on  
22  
23 376 implementing effective programmes there would be USD 18 return in future economic benefits<sup>58</sup>. Very few  
24  
25 377 obesity prevention interventions targeting children have been effective and a comprehensive multifaceted strategy  
26  
27 378 tackling diet, physical inactivity, coupled with psychosocial support and local food environment change may  
28  
29 379 prove more effective. Nutrition policies tackling child obesity must promote household nutrition security and  
30  
31 380 healthy growth, decrease overconsumption of nutrient-poor foods, better shield children from increasingly  
32  
33 381 pervasive marketing of energy-dense, nutrient-poor foods and sugar sweetened beverages as well as reduction of  
34  
35 382 growing physical inactivity<sup>59</sup>.

36  
37 383 Our findings suggest the need to implement evidence-based child health strategies and policy (e.g. further social  
38  
39 384 grant support to vulnerable and impoverished households) that is tailored to specific geographies and socially  
40  
41 385 disadvantaged sub-populations. A higher prevalence of child thinness/wasting among younger mothers (<25) in  
42  
43 386 poorer, food insecure household, highlights the importance of policies that enable younger mothers to adequately  
44  
45 387 care for their children in all settings. Integrated nutrition programs in low and middle income countries (LMIC)  
46  
47 388 have had a substantial impact on child nutrition and health via a combination of multisector targeted interventions  
48  
49 389<sup>60</sup>. Furthermore implementation and/or strengthening of school-based food program can provide a launching pad  
50  
51 390 for preventive programs including education and awareness, provision of healthier/more nutrition food options  
52  
53 391 and micronutrient supplementation, deworming, increased immunization coverage and improved growth  
54  
55 392 monitoring as well as counselling<sup>60</sup>. This may be especially true of obese children where high prevalence was  
56  
57 393 observed in higher income households with higher food purchasing power and where local food environments are  
58  
59 394 likely is likely to be an important contextual determinant. A further contextual trend which may further compound  
60

1  
2  
3 395 this problem is the rapidly rising median household income observed over the period (from ZAR1400 in 2008 to  
4  
5 396 ZAR 3640 by 2017).

## 6 7 8 397 **Conclusions**

9  
10 398 The heterogeneity of malnutrition is a feature of spatial inequality and rapid urbanization that has manifested in  
11  
12 399 widening levels of inequality in South Africa's districts and a need to reassess where nutrition programmes need  
13  
14 400 to be further decentralised to the highest risk municipalities and local communities to maximise effectiveness.  
15  
16 401 This work provides the first district level ranking of childhood overweight, thinness/wasting and stunting and  
17  
18 402 allows a differentiated pro-active tailored intervention to be developed for each municipal district. The dual  
19  
20 403 epidemic of undernutrition and overweight/obesity requires differential geographical policy inputs in metropolitan  
21  
22 404 areas and districts across the rural-urban divide. The current and future health cost of malnutrition among South  
23  
24 405 African children is likely substantial based on previous costing estimates. There is an urgent need to address  
25  
26 406 nutrition problems among preschool aged children in South Africa and other low and middle income countries.  
27  
28 407 Effective public health planning and geographically/contextually tailored interventions are required at sub-  
29  
30 408 national level to address this challenge. The analytical framework employed in this study we believe will have  
31  
32 409 definite utility in other settings.

## 33 34 410 **References**

- 35  
36 411 1. Development Initiatives. 2018 Global Nutrition Report: Shining a light to spur action on nutrition.  
37 412 Bristol, UK: Development Initiatives, 2018.
- 38 413 2. Finucane MM, Stevens G, Cowan M, et al. Global Burden of Metabolic Risk Factors of Chronic  
39 414 Diseases Collaborating Group (Body Mass Index) National, regional, and global trends in body-  
40 415 mass index since 1980: systematic analysis of health examination surveys and epidemiological  
41 416 studies with 960 country-years and 9.1 million participants. *Lancet* 2011;377(9765):557-67.
- 42 417 3. Collaborators TGO. Health Effects of Overweight and Obesity in 195 Countries over 25 Years. *New*  
43 418 *England Journal of Medicine*;0(0):null. doi: 10.1056/NEJMoa1614362
- 44 419 4. Collaboration NRF. Trends in adult body-mass index in 200 countries from 1975 to 2014: a pooled  
45 420 analysis of 1698 population-based measurement studies with 19· 2 million participants. *The*  
46 421 *Lancet* 2016;387(10026):1377-96.
- 47 422 5. Bleich SN, Vercammen KA, Zatz LY, et al. Interventions to prevent global childhood overweight and  
48 423 obesity: a systematic review. *The Lancet Diabetes & Endocrinology* 2017
- 49 424 6. Malik VS, Willett WC, Hu FB. Global obesity: trends, risk factors and policy implications. *Nature*  
50 425 *Reviews Endocrinology* 2013;9(1):13-27.
- 51 426 7. Bain LE, Awah PK, Geraldine N, et al. Malnutrition in Sub-Saharan Africa: burden, causes and  
52 427 prospects. *Pan African Medical Journal* 2013;15(1)
- 53 428 8. Rossouw HA, Grant CC, Viljoen M. Overweight and obesity in children and adolescents: The South  
54 429 African problem. *South African journal of science* 2012;108(5-6):31-37.
- 55 430 9. Keino S, Plasqui G, Ettyang G, et al. Determinants of stunting and overweight among young children  
56 431 and adolescents in sub-Saharan Africa. *Food and nutrition bulletin* 2014;35(2):167-78.
- 57  
58  
59  
60



1  
2  
3  
4  
5  
6  
7  
8  
9  
10  
11  
12  
13  
14  
15  
16  
17  
18  
19  
20  
21  
22  
23  
24  
25  
26  
27  
28  
29  
30  
31  
32  
33  
34  
35  
36  
37  
38  
39  
40  
41  
42  
43  
44  
45  
46  
47  
48  
49  
50  
51  
52  
53  
54  
55  
56  
57  
58  
59  
60

10. Osgood-Zimmerman A, Milleer AI, Stubbs RW, et al. Mapping child growth failure in Africa between 2000 and 2015. *Nature* 2018;555(7694):41.
11. Cois A, Day C. Obesity trends and risk factors in the South African adult population. *BMC obesity* 2015;2(1):42.
12. Sartorius B, Veerman LJ, Manyema M, et al. Determinants of obesity and associated population attributability, South Africa: Empirical evidence from a national panel survey, 2008-2012. *PLoS one* 2015;10(6):e0130218.
13. Leibbrandt M, Woolard I, de Villiers L. Methodology: Report on NIDS wave 1. *Technical paper* 2009;1
14. Southern Africa Labour and Development Research Unit. National Income Dynamics Study 2017, Wave 5 [dataset]. Version 1.0.0 In: Pretoria: Department of Planning M, and Evaluation [funding agency]. Cape Town: Southern Africa Labour and Development Research Unit [implementer], 2018. , ed.: Cape Town: DataFirst [distributor], 2018., 2018.
15. Health WHONf. WHO child growth standards: growth velocity based on weight, length and head circumference: methods and development: World Health Organization 2009.
16. Organization WH, Health WHONf. WHO child growth standards: head circumference-for-age, arm circumference-for-age, triceps skinfold-for-age and subscapular skinfold-for-age: methods and development: World Health Organization 2007.
17. Gibson RS. Principles of nutritional assessment: Oxford university press, USA 2005.
18. Anselin L, Syabri I, Kho Y. GeoDa: an introduction to spatial data analysis. *Geographical analysis* 2006;38(1):5-22.
19. Anderson C, Ryan L. A comparison of spatio-temporal disease mapping approaches including an application to ischaemic heart disease in New South Wales, Australia. *International journal of environmental research and public health* 2017;14(2):146.
20. Martínez-Beneito MA, López-Quilez A, Botella-Rocamora P. An autoregressive approach to spatio-temporal disease mapping. *Statistics in medicine* 2008;27(15):2874-89.
21. Besag J, York J, Mollié A. Bayesian image restoration, with two applications in spatial statistics. *Annals of the institute of statistical mathematics* 1991;43(1):1-20.
22. Wakefield J, Best N, Waller L. Bayesian approaches to disease mapping. *Spatial epidemiology: methods and applications* 2000:104-07.
23. Gelman A, Rubin DB. Inference from iterative simulation using multiple sequences. *Statistical science* 1992;7(4):457-72.
24. Zere E, McIntyre D. Inequities in under-five child malnutrition in South Africa. *International journal for equity in health* 2003;2(1):7.
25. Jinabhai C, Taylor M, Sullivan K. Implications of the prevalence of stunting, overweight and obesity amongst South African primary school children: a possible nutritional transition? *European journal of clinical nutrition* 2003;57(2):358.
26. Armstrong ME, Lambert MI, Lambert EV. Secular trends in the prevalence of stunting, overweight and obesity among South African children (1994–2004). *European journal of clinical nutrition* 2011;65(7):835.
27. Kandala N-B, Madungu TP, Emina JB, et al. Malnutrition among children under the age of five in the Democratic Republic of Congo (DRC): does geographic location matter? *BMC public health* 2011;11(1):261.
28. Bredenkamp C, Buisman LR, Van de Poel E. Persistent inequalities in child undernutrition: evidence from 80 countries, from 1990 to today. *International Journal of Epidemiology* 2014;43(4):1328-35.
29. Di Cesare M, Bhatti Z, Soofi SB, et al. Geographical and socioeconomic inequalities in women and children's nutritional status in Pakistan in 2011: an analysis of data from a nationally representative survey. *The Lancet Global Health* 2015;3(4):e229-e39.
30. Ataguba JE, Akazili J, McIntyre D. Socioeconomic-related health inequality in South Africa: evidence from General Household Surveys. *International journal for equity in health* 2011;10(1):48.

- 1  
2  
3 483 31. Van de Poel E, Hosseinpoor AR, Speybroeck N, et al. Socioeconomic inequality in malnutrition in  
4 484 developing countries. *Bulletin of the World Health Organization* 2008;86:282-91.
- 5 485 32. Delpuech F, Traissac P, Martin-Prével Y, et al. Economic crisis and malnutrition: socioeconomic  
6 486 determinants of anthropometric status of preschool children and their mothers in an African  
7 487 urban area. *Public health nutrition* 2000;3(1):39-47.
- 8 488 33. Oyvat C. Agrarian structures, urbanization, and inequality. *World Development* 2016;83:207-30.
- 9 489 34. Hoddinott J, Haddad L. Does female income share influence household expenditures? Evidence  
10 490 from Côte d'Ivoire. *oxford Bulletin of Economics and Statistics* 1995;57(1):77-96.
- 11 491 35. Aryastami NK, Shankar A, Kusumawardani N, et al. Low birth weight was the most dominant  
12 492 predictor associated with stunting among children aged 12–23 months in Indonesia. *BMC*  
13 493 *Nutrition* 2017;3(1):16.
- 14 494 36. de Bernabé JV, Soriano T, Albaladejo R, et al. Risk factors for low birth weight: a review. *European*  
15 495 *Journal of Obstetrics & Gynecology and Reproductive Biology* 2004;116(1):3-15.
- 16 496 37. Frank TD, Carter A, Jahagirdar D, et al. Global, regional, and national incidence, prevalence, and  
17 497 mortality of HIV, 1980–2017, and forecasts to 2030, for 195 countries and territories: a  
18 498 systematic analysis for the Global Burden of Diseases, Injuries, and Risk Factors Study 2017.  
19 499 *The Lancet HIV* 2019
- 20 500 38. Xiao P-L, Zhou Y-B, Chen Y, et al. Association between maternal HIV infection and low birth weight  
21 501 and prematurity: a meta-analysis of cohort studies. *BMC pregnancy and childbirth*  
22 502 2015;15(1):246.
- 23 503 39. Althabe F, Moore JL, Gibbons L, et al. Adverse maternal and perinatal outcomes in adolescent  
24 504 pregnancies: The Global Network's Maternal Newborn Health Registry study. *Reproductive*  
25 505 *health* 2015;12(2):S8.
- 26 506 40. Patel D, Bland R, Coovadia H, et al. Breastfeeding, HIV status and weights in South African children:  
27 507 a comparison of HIV-exposed and unexposed children. *Aids* 2010;24(3):437-45.
- 28 508 41. Wamani H, Åström AN, Peterson S, et al. Boys are more stunted than girls in sub-Saharan Africa: a  
29 509 meta-analysis of 16 demographic and health surveys. *BMC pediatrics* 2007;7(1):17.
- 30 510 42. Redding S, Conrey E, Porter K, et al. Pathways community care coordination in low birth weight  
31 511 prevention. *Maternal and child health journal* 2015;19(3):643-50.
- 32 512 43. Statistics South Africa. Recorded live births 2012.  
33 513 [www.statssa.gov.za/publications/P0305/P03052011.pdf](http://www.statssa.gov.za/publications/P0305/P03052011.pdf). 2012
- 34 514 44. Organization WH. WHA Global nutrition targets 2025: low birth weight policy brief. Geneva: WHO,  
35 515 2014.[Accessed on: June 1st, 2017].
- 36 516 45. Monasta L, Batty G, Cattaneo A, et al. Early-life determinants of overweight and obesity: a review  
37 517 of systematic reviews. *Obesity reviews* 2010;11(10):695-708.
- 38 518 46. Kruger R, Kruger H, Macintyre U. The determinants of overweight and obesity among 10-to 15-  
39 519 year-old schoolchildren in the North West Province, South Africa—the THUSA BANA (Transition  
40 520 and Health during Urbanisation of South Africans; BANA, children) study. *Public health*  
41 521 *nutrition* 2006;9(3):351-58.
- 42 522 47. Pereira LM. The future of South Africa's food system: What is research telling us. *SA Food Lab*  
43 523 *South Africa* 2014
- 44 524 48. McLachlan M, Landman A. Nutrition-sensitive agriculture—a South African perspective. *Food*  
45 525 *security* 2013;5(6):857-71.
- 46 526 49. Brophy S, Cooksey R, Gravenor MB, et al. Risk factors for childhood obesity at age 5: analysis of the  
47 527 millennium cohort study. *BMC public health* 2009;9(1):467.
- 48 528 50. Brunt H, Lester N, Davies G, et al. Childhood overweight and obesity: is the gap closing the wrong  
49 529 way? *Journal of public health* 2008;30(2):145-52.
- 50 530 51. Kim TJ, von dem Knesebeck O. Income and obesity: what is the direction of the relationship? A  
51 531 systematic review and meta-analysis. *BMJ open* 2018;8(1):e019862.
- 52 532 52. Rossouw HA, Grant CC, Viljoen M. Overweight and obesity in children and adolescents: the South  
53 533 African problem: review article. *South African Journal of Science* 2012;108(5-6):1-7.
- 54  
55  
56  
57  
58  
59  
60

1

2

3 534 53. Finkelstein EA, Graham WCK, Malhotra R. Lifetime direct medical costs of childhood obesity.  
4 535 *Pediatrics* 2014;ped. 2014-0063.

5 536 54. Horton S, Shekar M, Ajay M. Scaling up nutrition: What will it cost?: The World Bank 2009.

6 537 55. McGovern ME, Krishna A, Aguayo VM, et al. A review of the evidence linking child stunting to  
7 538 economic outcomes. *International journal of epidemiology* 2017;46(4):1171-91.

8 539 56. Sartorius K, Sartorius B, Winkler C, et al. 1. Abstract 2. Introduction 3. miRNA biogenesis, mRNA  
9 540 silencing and export into the extracellular space 3.1. Intracellular mRNA silencing 3.2.  
10 541 Extracellular mRNA silencing.

11 542 57. Vaivada T, Gaffey MF, Das JK, et al. Evidence-based interventions for improvement of maternal and  
12 543 child nutrition in low-income settings: what's new? *Current Opinion in Clinical Nutrition &*  
13 544 *Metabolic Care* 2017;20(3):204-10.

14 545 58. Hoddinott J, Alderman H, Behrman JR, et al. The economic rationale for investing in stunting  
15 546 reduction. *Maternal & Child Nutrition* 2013;9:69-82.

16 547 59. Lobstein T, Jackson-Leach R, Moodie ML, et al. Child and adolescent obesity: part of a bigger  
17 548 picture. *The lancet* 2015;385(9986):2510-20.

18 549 60. UNICEF. Progress for children: a report card on nutrition: Unicef 2006.

19 548  
20 549  
21  
22 550

23

24

## 25 551 **Authors' contributions**

26

27 552 All authors contributed to the conception and design of the study. BS performed the analysis and initial

28  
29 553 interpretation of the findings. BS drafted the manuscript. All authors reviewed and provided input to revise the

30  
31 554 manuscript. All authors gave final approval for submission.

32

33

## 34 555 **Funding**

35

36 556 This study forms part of the Sustainable and Healthy Food Systems (SHEFS) project supported by the Wellcome

37 557 Trust's Our Planet, Our Health programme (grant number 205200/Z/16/Z). The funders of the study had no role in

38  
39 558 study design, data collection, data analysis, data interpretation or writing of the report.

40

41

## 42 43 559 **Competing interests**

44

45  
46 560 None declared.

47

## 48 49 561 **Patient consent for publication**

50

51 562 Not required.

52

53

## 54 563 **Ethics approval**

55

56  
57 564 This study utilised open access data and hence ethical approval was not necessary.

58

59

## 60 565 **Data availability statement**

1  
2  
3  
4  
5  
6  
7  
8  
9  
10  
11  
12  
13  
14  
15  
16  
17  
18  
19  
20  
21  
22  
23  
24  
25  
26  
27  
28  
29  
30  
31  
32  
33  
34  
35  
36  
37  
38  
39  
40  
41  
42  
43  
44  
45  
46  
47  
48  
49  
50  
51  
52  
53  
54  
55  
56  
57  
58  
59  
60

566 Data are publically available at <https://www.datafirst.uct.ac.za/dataportal/index.php/catalog/NIDS/about>

567

For peer review only

568 **Tables**569 **Table 1: Burden of stunting, thinness/wasting and obesity among children by age and survey round**

| Survey wave | Age (in years)      | N (valid HAZ) | n (stunted) | Prop: Stunted i | Estimated Population stunted | N (valid BMIZ)                   | n (thin/wasted) | Prop: Thinness ii | Estimated Population thinness | n (obese)                  | Prop: obese iii | Estimated Population obese |                                  |
|-------------|---------------------|---------------|-------------|-----------------|------------------------------|----------------------------------|-----------------|-------------------|-------------------------------|----------------------------|-----------------|----------------------------|----------------------------------|
| 10          | 2008                | 0             | 220         | 31              | 0.14 (0.09, 0.22)            | 153648 (81545, 273371)           | 180             | 21                | 0.12 (0.07, 0.2)              | 133882 (66374, 251867)     | 32              | 0.1 (0.06, 0.15)           | 107783 (59737, 185749)           |
| 11          |                     | 1             | 419         | 29              | 0.08 (0.05, 0.13)            | 91903 (48436, 164369)            | 386             | 24                | 0.06 (0.03, 0.11)             | 66566 (29263, 143661)      | 76              | 0.22 (0.16, 0.3)           | 253021 (159436, 383096)          |
| 12          |                     | 2             | 453         | 62              | 0.15 (0.1, 0.21)             | 159241 (96989, 250626)           | 419             | 10                | 0.03 (0.01, 0.07)             | 34613 (12484, 87598)       | 70              | 0.14 (0.1, 0.19)           | 148357 (93148, 227510)           |
| 13          |                     | 3             | 489         | 55              | 0.11 (0.08, 0.15)            | 111595 (69906, 172639)           | 470             | 19                | 0.04 (0.02, 0.07)             | 39715 (20205, 75821)       | 67              | 0.17 (0.12, 0.24)          | 176235 (104092, 284620)          |
| 14          |                     | 4             | 498         | 48              | 0.09 (0.06, 0.13)            | 93391 (54519, 154136)            | 461             | 25                | 0.05 (0.03, 0.08)             | 52031 (27083, 96623)       | 34              | 0.08 (0.05, 0.12)          | 80282 (45874, 135732)            |
| 15          |                     | 0-5           | 2079        | 225             | 0.11 (0.09, 0.13) iv         | 591550 (451494, 766049)          | 1916            | 99                | 0.05 (0.04, 0.07) iv          | 277743 (196715, 385904)    | 279             | 0.14 (0.12, 0.17) iv       | 778865 (599156, 996439)          |
| 16          | 2010/11             | 0             | 75          | 24              | 0.33 (0.16, 0.57)            | 289420 (114550, 577181)          | 69              | 7                 | 0.1 (0.04, 0.23)              | 88499 (30258, 228461)      | 22              | 0.39 (0.21, 0.61)          | 340820 (153454, 615984)          |
| 17          |                     | 1             | 236         | 20              | 0.06 (0.03, 0.11)            | 63995 (25204, 132218)            | 215             | 11                | 0.07 (0.03, 0.14)             | 69776 (25204, 173842)      | 52              | 0.29 (0.19, 0.41)          | 299127 (159624, 499489)          |
| 18          |                     | 2             | 340         | 61              | 0.22 (0.16, 0.29)            | 267019 (166414, 407708)          | 314             | 17                | 0.06 (0.03, 0.11)             | 76344 (35363, 155183)      | 72              | 0.22 (0.16, 0.29)          | 270818 (167454, 414761)          |
| 19          |                     | 3             | 427         | 52              | 0.11 (0.07, 0.16)            | 130531 (73921, 220389)           | 402             | 20                | 0.03 (0.02, 0.06)             | 39208 (16427, 85938)       | 78              | 0.16 (0.11, 0.23)          | 195314 (114988, 313258)          |
| 20          |                     | 4             | 422         | 62              | 0.17 (0.12, 0.24)            | 205730 (122130, 329629)          | 394             | 19                | 0.03 (0.02, 0.06)             | 39494 (17639, 84450)       | 65              | 0.17 (0.12, 0.24)          | 208842 (126152, 329629)          |
| 21          |                     | 0-5           | 1500        | 219             | 0.16 (0.13, 0.19)            | 862302 (633920, 1148376)         | 1394            | 74                | 0.05 (0.03, 0.07)             | 265877 (167080, 405309)    | 289             | 0.21 (0.17, 0.26)          | 1159133 (835398, 1565968)        |
| 22          | 2012                | 0             | 271         | 59              | 0.2 (0.14, 0.28)             | 181464 (108101, 288795)          | 250             | 38                | 0.2 (0.12, 0.3)               | 179118 (95658, 311389)     | 55              | 0.19 (0.12, 0.28)          | 169192 (94880, 284482)           |
| 23          |                     | 1             | 544         | 78              | 0.13 (0.09, 0.17)            | 132310 (80796, 207206)           | 538             | 27                | 0.08 (0.05, 0.13)             | 80862 (40842, 150046)      | 138             | 0.23 (0.18, 0.28)          | 234062 (157153, 334626)          |
| 24          |                     | 2             | 629         | 72              | 0.1 (0.07, 0.14)             | 116230 (68690, 187924)           | 629             | 49                | 0.05 (0.03, 0.07)             | 55866 (30861, 97391)       | 147             | 0.23 (0.18, 0.29)          | 269508 (176205, 392309)          |
| 25          |                     | 3             | 710         | 82              | 0.11 (0.08, 0.16)            | 142259 (82987, 232297)           | 692             | 29                | 0.03 (0.02, 0.06)             | 43898 (20928, 87296)       | 102             | 0.15 (0.11, 0.2)           | 191943 (117798, 297399)          |
| 26          |                     | 4             | 771         | 112             | 0.16 (0.12, 0.2)             | 221293 (142258, 330201)          | 762             | 30                | 0.03 (0.02, 0.05)             | 43556 (20731, 87406)       | 118             | 0.18 (0.14, 0.22)          | 250658 (167278, 362573)          |
| 27          |                     | 0-5           | 2925        | 403             | 0.13 (0.11, 0.16)            | 762303 (567517, 1001855)         | 2871            | 173               | 0.06 (0.05, 0.07)             | 328768 (230074, 458914)    | 560             | 0.19 (0.17, 0.22)          | 1112487 (853832, 1415525)        |
| 28          | 2014/15             | 0             | 434         | 74              | 0.12 (0.08, 0.18)            | 144201 (81319, 240730)           | 421             | 37                | 0.1 (0.06, 0.18)              | 123211 (59233, 240730)     | 78              | 0.17 (0.12, 0.23)          | 197209 (117461, 313223)          |
| 29          |                     | 1             | 801         | 53              | 0.06 (0.04, 0.08)            | 67916 (39433, 112566)            | 801             | 24                | 0.03 (0.01, 0.08)             | 39657 (9858, 101845)       | 169             | 0.23 (0.18, 0.28)          | 266780 (179421, 379240)          |
| 30          |                     | 2             | 785         | 65              | 0.08 (0.05, 0.12)            | 85985 (48668, 146305)            | 781             | 16                | 0.02 (0.01, 0.03)             | 16222 (6309, 39015)        | 128             | 0.16 (0.12, 0.22)          | 170803 (106348, 263349)          |
| 31          |                     | 3             | 853         | 82              | 0.08 (0.06, 0.11)            | 89857 (54478, 143034)            | 845             | 24                | 0.04 (0.02, 0.07)             | 40865 (18323, 86890)       | 79              | 0.12 (0.08, 0.15)          | 133857 (83637, 205862)           |
| 32          |                     | 4             | 899         | 67              | 0.06 (0.04, 0.09)            | 77887 (45801, 127320)            | 897             | 19                | 0.02 (0.01, 0.05)             | 30376 (12301, 71898)       | 56              | 0.06 (0.04, 0.11)          | 82300 (38662, 166265)            |
| 33          |                     | 0-5           | 3772        | 341             | 0.08 (0.06, 0.09)            | 441281 (327611, 581707)          | 3745            | 120               | 0.04 (0.03, 0.05)             | 213012 (130004, 333338)    | 510             | 0.14 (0.12, 0.17)          | 834444 (618820, 1098053)         |
| 34          | 2017                | 0             | 372         | 50              | 0.13 (0.08, 0.19)            | 125347 (68160, 218303)           | 357             | 32                | 0.12 (0.07, 0.2)              | 121396 (62270, 221478)     | 70              | 0.18 (0.12, 0.25)          | 174538 (104344, 278066)          |
| 35          |                     | 1             | 760         | 55              | 0.08 (0.05, 0.11)            | 95527 (56435, 153804)            | 742             | 23                | 0.03 (0.02, 0.07)             | 42416 (17767, 94222)       | 146             | 0.23 (0.19, 0.29)          | 285123 (194388, 403216)          |
| 36          |                     | 2             | 833         | 63              | 0.07 (0.05, 0.11)            | 94807 (54147, 158550)            | 830             | 20                | 0.03 (0.02, 0.07)             | 43976 (18786, 99279)       | 130             | 0.15 (0.12, 0.19)          | 191812 (127079, 280056)          |
| 37          |                     | 3             | 875         | 77              | 0.08 (0.05, 0.12)            | 99890 (54439, 175689)            | 872             | 14                | 0.02 (0.01, 0.06)             | 30726 (10888, 79204)       | 77              | 0.07 (0.05, 0.1)           | 88889 (54439, 138247)            |
| 38          |                     | 4             | 900         | 59              | 0.05 (0.04, 0.07)            | 57363 (34849, 91231)             | 899             | 23                | 0.03 (0.01, 0.05)             | 29923 (13628, 62962)       | 47              | 0.06 (0.04, 0.08)          | 63912 (36990, 105365)            |
| 39          |                     | 0-5           | 3740        | 304             | 0.08 (0.06, 0.09) iv         | 445295 (326192, 593240)          | 3700            | 112               | 0.04 (0.03, 0.05) iv          | 223236 (136790, 345514)    | 470             | 0.13 (0.11, 0.15) iv       | 758650 (583989, 964831)          |
| 40          | At last observation | 0-5           | 10711       | 1049            | 0.09 (0.08, 0.10)            | 1 397 020 (1 177 247, 1 616 793) | 10467           | 391               | 0.04 (0.03, 0.05)             | 560 806 (448 656, 672 957) | 1,438           | 0.14 (0.13, 0.16)          | 2 048 650 (1 722 242, 2 375 058) |

i: HAZ  $\leq -2$  SD; ii BMI for age z-score  $\leq -2$ SD; iii BMI for age z-score  $\geq +2$ SD

iv: Significance tests (survey weighted logistic regression) among children 0-5: stunting (2017 vs 2008) p=0.007; thinness/wasting (2017 vs 2008) p=0.131; obesity (2017 vs 2008) p=0.312

575 **Table 2:** Demographic, socio-economic and maternal factors associated with nutritional status among children  
 576 under 5 years, 2008-2017

| Variable                                    | Category               | Stunted                |                        | p-value                | Thin/wasted            |                        | p-value                | Obese                  |                        | p-value          |
|---------------------------------------------|------------------------|------------------------|------------------------|------------------------|------------------------|------------------------|------------------------|------------------------|------------------------|------------------|
|                                             |                        | Yes (% col)            | No (% col)             |                        | Yes (% col)            | No (% col)             |                        | Yes (% col)            | No (% col)             |                  |
| Ethnicity                                   | African                | 0.939<br>[.9027,.9619] | 0.871<br>[.8284,.9039] | <b>&lt;0.001</b>       | 0.885<br>[.8155,.9306] | 0.879<br>[.8383,.9108] | 0.823                  | 0.931<br>[.9017,.9522] | 0.870<br>[.8255,.9044] | <b>&lt;0.001</b> |
|                                             | Coloured               | 0.053<br>[.0311,.0879] | 0.074<br>[.0486,.1116] |                        | 0.076<br>[.0415,.1344] | 0.072<br>[.0474,.1081] |                        | 0.052<br>[.0333,.0789] | 0.076<br>[.0495,.1152] |                  |
|                                             | Asian/Indian           | 0.003 [4.0e-04,.0202]  | 0.012<br>[.0049,.0294] |                        | 0.015<br>[.0026,.077]  | 0.011<br>[.0046,.0278] |                        | 0.004 [8.4e-04,.0141]  | 0.013<br>[.0053,.0317] |                  |
|                                             | White                  | 0.006<br>[.0017,.0179] | 0.039<br>[.0238,.0627] |                        | 0.025<br>[.0083,.0711] | 0.037<br>[.0229,.0605] |                        | 0.014<br>[.0066,.0287] | 0.041<br>[.0248,.067]  |                  |
| Gender                                      | Male                   | 0.562<br>[.5204,.603]  | 0.496<br>[.4797,.5121] | <b>0.002</b>           | 0.514<br>[.4543,.5742] | 0.501<br>[.4846,.5182] | 0.686                  | 0.523<br>[.488,.5575]  | 0.498<br>[.481,.5151]  | 0.178            |
|                                             | Female                 | 0.438<br>[.397,.4796]  | 0.504<br>[.4879,.5203] |                        | 0.486<br>[.4258,.5457] | 0.499<br>[.4818,.5154] |                        | 0.477<br>[.4425,.512]  | 0.502<br>[.4849,.519]  |                  |
| Birthweight                                 | LBW (<2.5 kgs)         | 0.148<br>[.1143,.1891] | 0.098<br>[.0849,.1117] | <b>&lt;0.001</b>       | 0.13<br>[.0891,.1867]  | 0.098<br>[.0858,.1111] | 0.163                  | 0.072<br>[.0554,.0938] | 0.104<br>[.0919,.118]  | <b>0.006</b>     |
|                                             | NBW (≥2.5 kgs)         | 0.852<br>[.8109,.8857] | 0.903<br>[.8883,.9151] |                        | 0.87<br>[.8133,.9109]  | 0.902<br>[.8889,.9142] |                        | 0.928<br>[.9062,.9446] | 0.896<br>[.882,.9081]  |                  |
|                                             | HBW (≥4 kgs)           | Not applicable         |                        |                        | Not applicable         |                        |                        | 0.056<br>[.0419,.0751] | 0.04<br>[.0323,.0496]  |                  |
| Income quintile                             | Lowest                 | 0.294<br>[.2567,.3334] | 0.199<br>[.1824,.2156] | <b>&lt;0.001</b>       | 0.234<br>[.1805,.2973] | 0.203<br>[.1872,.2195] | 0.481                  | 0.226<br>[.1936,.2617] | 0.2<br>[.1834,.2181]   | 0.422            |
|                                             | Low                    | 0.205<br>[.1714,.2423] | 0.187<br>[.1714,.2028] |                        | 0.214<br>[.1698,.2656] | 0.188<br>[.173,.2029]  |                        | 0.203<br>[.1725,.2377] | 0.186<br>[.1723,.2005] |                  |
|                                             | Middle                 | 0.183<br>[.1555,.2148] | 0.200<br>[.1853,.2154] |                        | 0.169<br>[.1305,.2167] | 0.201<br>[.1871,.2162] |                        | 0.18<br>[.1501,.2135]  | 0.204<br>[.1891,.2189] |                  |
|                                             | High                   | 0.197<br>[.1579,.243]  | 0.186<br>[.1714,.2021] |                        | 0.184<br>[.1394,.2377] | 0.191<br>[.1751,.2074] |                        | 0.182<br>[.1445,.2269] | 0.192<br>[.1769,.2079] |                  |
|                                             | Highest                | 0.122<br>[.0924,.1583] | 0.229<br>[.2015,.2585] |                        | 0.2<br>[.1494,.2612]   | 0.218<br>[.1906,.2476] |                        | 0.209<br>[.1673,.2586] | 0.218<br>[.1915,.2478] |                  |
| Low monthly household income                | <R2500                 | 0.566<br>[.5213,.6101] | 0.417<br>[.3929,.4409] | <b>&lt;0.001</b>       | 0.488<br>[.4228,.5544] | 0.423<br>[.3994,.4469] | <b>0.053</b>           | 0.481<br>[.4406,.5214] | 0.416<br>[.392,.4396]  | <b>0.001</b>     |
|                                             | ≥R2500                 | 0.434<br>[.3899,.4787] | 0.583<br>[.5591,.6071] |                        | 0.512<br>[.4456,.5772] | 0.577<br>[.5531,.6006] |                        | 0.519<br>[.4786,.5594] | 0.584<br>[.5604,.608]  |                  |
| Child hungry in last year (food security) i | Never                  | 0.689<br>[.595,.7701]  | 0.697<br>[.6568,.7346] | 0.505                  | 0.512<br>[.3895,.6337] | 0.704<br>[.6643,.7401] | <b>&lt;0.001</b>       | 0.707<br>[.6302,.773]  | 0.693<br>[.6522,.7318] | 0.645            |
|                                             | Seldom                 | 0.127<br>[.0669,.2286] | 0.096<br>[.0766,.1193] |                        | 0.111<br>[.056,.2074]  | 0.097<br>[.0765,.1219] |                        | 0.076<br>[.0499,.1138] | 0.102<br>[.0787,.13]   |                  |
|                                             | Sometimes              | 0.126<br>[.0807,.1919] | 0.155<br>[.1303,.184]  |                        | 0.317<br>[.219,.4354]  | 0.148<br>[.1243,.1752] |                        | 0.154<br>[.0994,.231]  | 0.155<br>[.1316,.1822] |                  |
|                                             | Often                  | 0.054<br>[.0265,.1049] | 0.043<br>[.0276,.0653] |                        | 0.052<br>[.0222,.1181] | 0.042<br>[.0272,.0655] |                        | 0.052<br>[.0272,.0981] | 0.041<br>[.0269,.0621] |                  |
|                                             | Always                 | 0.004<br>[.0011,.0144] | 0.009<br>[.0048,.0173] |                        | 0.007<br>[.001,.0504]  | 0.009<br>[.0049,.0171] |                        | 0.011<br>[.0039,.0313] | 0.009<br>[.0048,.016]  |                  |
| Province                                    | Eastern Cape           | 0.165<br>[.1137,.2336] | 0.132<br>[.0978,.1765] | <b>0.012</b>           | 0.075<br>[.0492,.1137] | 0.137<br>[.1007,.1838] | <b>0.002</b>           | 0.19<br>[.1321,.2643]  | 0.124<br>[.0916,.1652] | <b>&lt;0.001</b> |
|                                             | Free State             | 0.066<br>[.0441,.0961] | 0.050<br>[.036,.0678]  |                        | 0.032<br>[.0169,.0611] | 0.052<br>[.0376,.0709] |                        | 0.045<br>[.0298,.068]  | 0.052<br>[.0379,.071]  |                  |
|                                             | Gauteng                | 0.188<br>[.132,.2606]  | 0.236<br>[.1819,.2996] |                        | 0.298<br>[.1952,.4272] | 0.231<br>[.1784,.2937] |                        | 0.173<br>[.1234,.2365] | 0.246<br>[.1891,.3128] |                  |
|                                             | KwaZulu-Natal          | 0.218<br>[.1619,.2857] | 0.227<br>[.1801,.2819] |                        | 0.161<br>[.1151,.2195] | 0.228<br>[.1804,.2835] |                        | 0.293<br>[.217,.3834]  | 0.212<br>[.1691,.262]  |                  |
|                                             | Limpopo                | 0.143<br>[.0947,.2088] | 0.109<br>[.0816,.1444] |                        | 0.129<br>[.0823,.195]  | 0.113<br>[.0842,.1491] |                        | 0.074<br>[.0514,.105]  | 0.121<br>[.0902,.1599] |                  |
|                                             | Mpumalanga             | 0.085<br>[.0541,.1318] | 0.083<br>[.0621,.1102] |                        | 0.096<br>[.0611,.1487] | 0.082<br>[.0611,.1098] |                        | 0.074<br>[.0506,.1079] | 0.085<br>[.0626,.1131] |                  |
|                                             | North West             | 0.055<br>[.0355,.0833] | 0.05<br>[.035,.0709]   |                        | 0.06<br>[.0376,.0943]  | 0.05<br>[.0346,.0712]  |                        | 0.038<br>[.0252,.056]  | 0.053<br>[.0362,.076]  |                  |
|                                             | Northern Cape          | 0.022<br>[.0141,.0333] | 0.023<br>[.0163,.031]  |                        | 0.033<br>[.0217,.0489] | 0.022<br>[.0159,.0303] |                        | 0.011<br>[.0072,.0156] | 0.025<br>[.0178,.0341] |                  |
|                                             | Western Cape           | 0.06<br>[.0321,.1089]  | 0.091<br>[.0606,.134]  |                        | 0.116<br>[.0638,.2016] | 0.086<br>[.0572,.1262] |                        | 0.103<br>[.0626,.1641] | 0.084<br>[.0554,.1254] |                  |
| Rural/Tribal authority Environment          | 0.519<br>[.4417,.5963] | 0.451<br>[.3933,.5091] | <b>&lt;0.001</b>       | 0.429<br>[.3428,.5201] | 0.46<br>[.4021,.5193]  | 0.466<br>[.3857,.5479] | 0.457<br>[.4002,.5158] | 0.111                  |                        |                  |



|    |                  |                       |                      |                  |                       |                      |              |                       |                      |              |
|----|------------------|-----------------------|----------------------|------------------|-----------------------|----------------------|--------------|-----------------------|----------------------|--------------|
| 3  |                  | 0.122                 | 0.101                |                  | 0.1                   | 0.102                |              | 0.133                 | 0.097                |              |
| 4  | Urban Informal   | [.0737,.1943]         | [.0628,.1592]        |                  | [.0557,.1743]         | [.0636,.161]         |              | [.0691,.239]          | [.0618,.148]         |              |
| 5  |                  | 0.359                 | 0.448                |                  | 0.47                  | 0.437                |              | 0.402                 | 0.446                |              |
| 6  | Urban Formal     | [.292,.4319]          | [.389,.509]          |                  | [.3734,.5696]         | [.3787,.4979]        |              | [.3261,.4821]         | [.3868,.5066]        |              |
| 7  | Underweight      | [.0271,.0604]         | [.0178,.0282]        |                  | [.0298,.0867]         | [.018,.0281]         |              | [.01,.0351]           | [.0198,.0311]        |              |
| 8  |                  | 0.397                 | 0.344                |                  | 0.418                 | 0.348                |              | 0.327                 | 0.356                |              |
| 9  | Normal           | [.3521,.444]          | [.3213,.3683]        |                  | [.3455,.4946]         | [.3251,.3724]        |              | [.2853,.3708]         | [.332,.3815]         |              |
| 10 | Overweight       | [.2311,.3092]         | [.2565,.289]         |                  | [.199,.3064]          | [.2565,.2881]        |              | [.23,.2922]           | [.2567,.2899]        |              |
| 11 |                  | 0.294                 | 0.361                |                  | 0.282                 | 0.357                |              | 0.395                 | 0.346                |              |
| 12 | Mother BMI       | [.2452,.3479]         | [.3342,.3882]        | <b>0.003</b>     | [.2137,.3615]         | [.3298,.3853]        | <b>0.005</b> | [.3514,.4396]         | [.3175,.3753]        | 0.135        |
| 13 | <20              | [.0562,.0947]         | [.0419,.0555]        |                  | [.0574,.206]          | [.041,.0532]         |              | [.0456,.0701]         | [.0418,.0562]        |              |
| 14 |                  | 0.219                 | 0.230                |                  | 0.258                 | 0.23                 |              | 0.265                 | 0.224                |              |
| 15 | 20-24            | [.1852,.2571]         | [.2152,.2459]        |                  | [.201,.3252]          | [.2138,.2461]        |              | [.2272,.3069]         | [.2091,.2405]        |              |
| 16 |                  | 0.468                 | 0.491                |                  | 0.398                 | 0.492                |              | 0.472                 | 0.49                 |              |
| 17 | 25-34            | [.4191,.5175]         | [.4705,.5107]        |                  | [.3311,.4691]         | [.4713,.5118]        |              | [.425,.5189]          | [.4691,.511]         |              |
| 18 |                  | 0.215                 | 0.210                |                  | 0.213                 | 0.211                |              | 0.191                 | 0.214                |              |
| 19 | 35-44            | [.1731,.2638]         | [.191,.2297]         |                  | [.1682,.2667]         | [.1923,.2301]        |              | [.1536,.236]          | [.1952,.2348]        |              |
| 20 | Mother age       | [.0161,.0381]         | [.0177,.0256]        | 0.156            | [.0089,.0388]         | [.018,.0261]         | <b>0.007</b> | [.0095,.024]          | [.0186,.0278]        | 0.121        |
| 21 | None             | [.0136,.0397]         | [.0144,.0226]        |                  | [.0127,.0479]         | [.0148,.0239]        |              | [.0157,.0406]         | [.014,.023]          |              |
| 22 |                  | 0.121                 | 0.072                |                  | 0.132                 | 0.071                |              | 0.067                 | 0.075                |              |
| 23 | Primary          | [.0921,.1576]         | [.0625,.0835]        |                  | [.095,.1804]          | [.061,.0825]         |              | [.0488,.0925]         | [.0647,.0869]        |              |
| 24 |                  | 0.799                 | 0.796                |                  | 0.715                 | 0.802                |              | 0.803                 | 0.798                |              |
| 25 | Secondary        | [.7529,.8385]         | [.7777,.8134]        |                  | [.6506,.7712]         | [.7832,.8203]        |              | [.7595,.8398]         | [.7785,.8152]        |              |
| 26 | Mother Education | [.0364,.0868]         | [.0985,.1307]        | <b>&lt;0.001</b> | [.0862,.1874]         | [.0925,.1251]        | <b>0.001</b> | [.077,.1405]          | [.0938,.1275]        | 0.568        |
| 27 | None             | 0.003 [8.0e-04,.0082] | 0.003 [0.0017,.0051] |                  | 0.005 [6.7e-04,.0333] | 0.003 [0.0017,.0051] |              | 0.002 [6.8e-04,.0053] | 0.003 [0.0018,.0057] |              |
| 28 |                  | 0.646                 | 0.56                 |                  | 0.565                 | 0.556                |              | 0.584                 | 0.551                |              |
| 29 | Primary          | [.5533,.7282]         | [.5162,.6028]        |                  | [.4542,.6703]         | [.5118,.5984]        |              | [.499,.6637]          | [.505,.5971]         |              |
| 30 |                  | 0.275                 | 0.389                |                  | 0.382                 | 0.387                |              | 0.318                 | 0.398                |              |
| 31 | Secondary        | [.2008,.3629]         | [.3468,.4334]        |                  | [.2783,.4965]         | [.3448,.431]         |              | [.2475,.3976]         | [.3529,.445]         |              |
| 32 | Father Education | [.0413,.1403]         | [.035,.0651]         | <b>0.020</b>     | [.0206,.1099]         | [.0389,.0761]        | 0.960        | [.0502,.1779]         | [.0338,.0658]        | <b>0.033</b> |

577 i: only included in wave 1 questionnaire

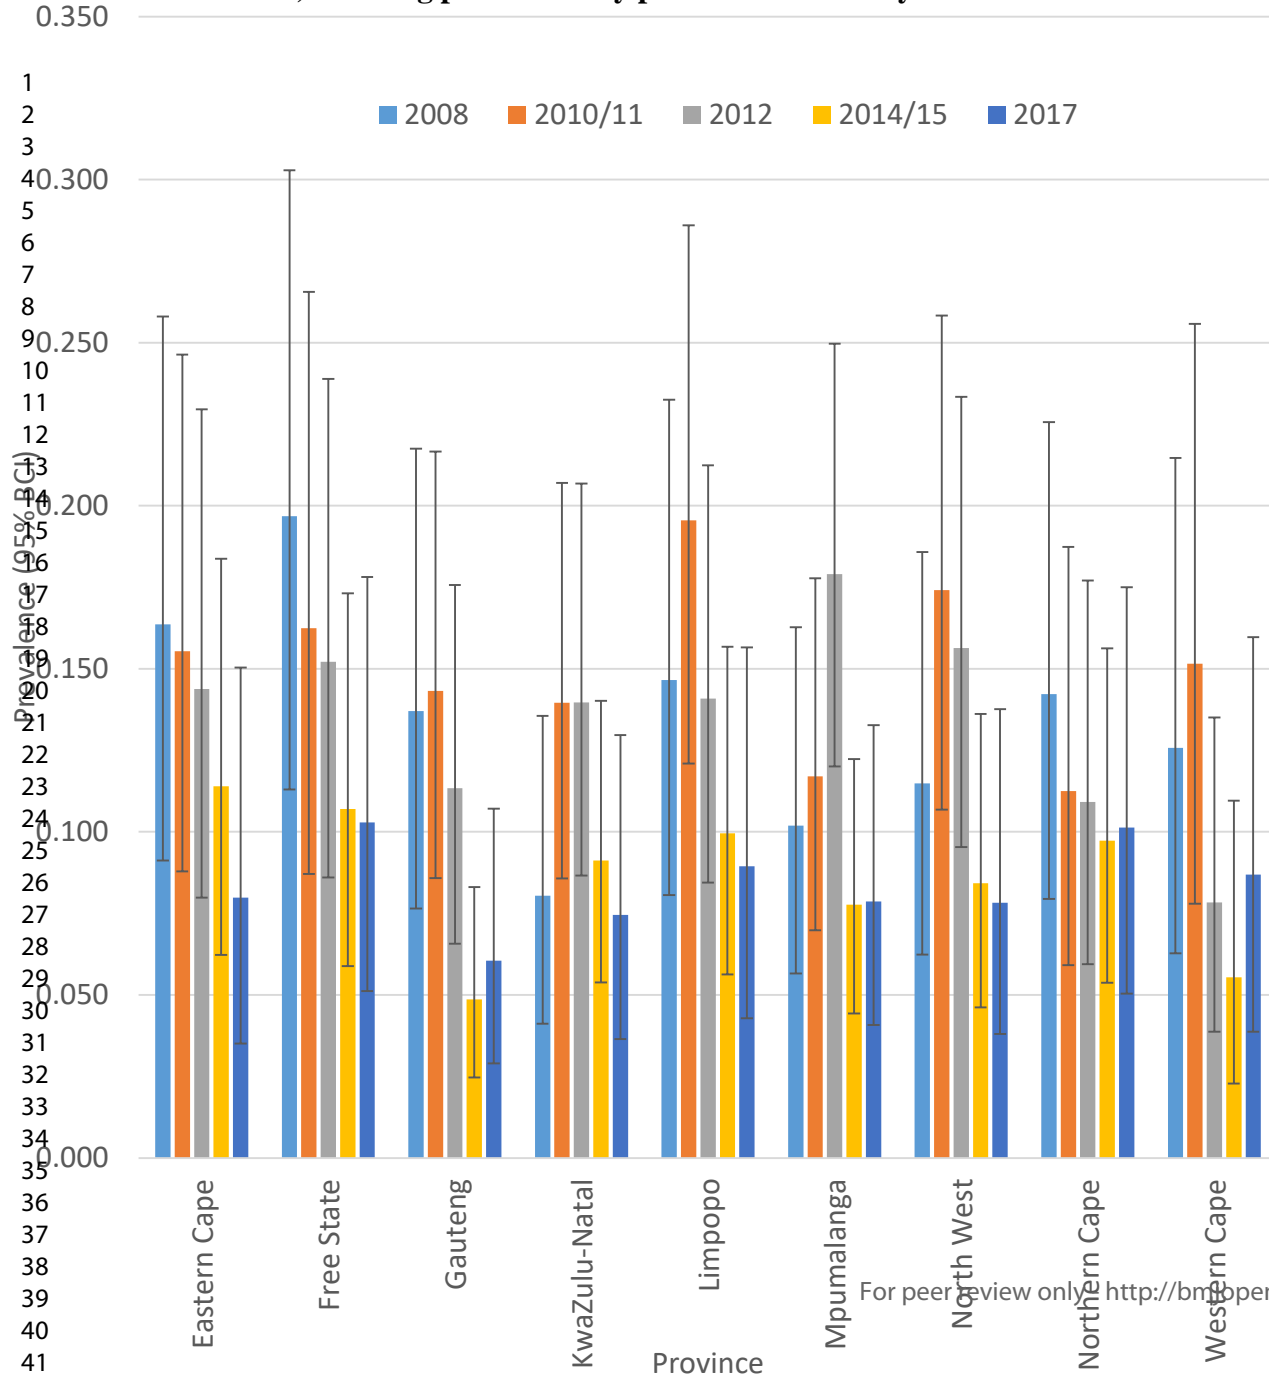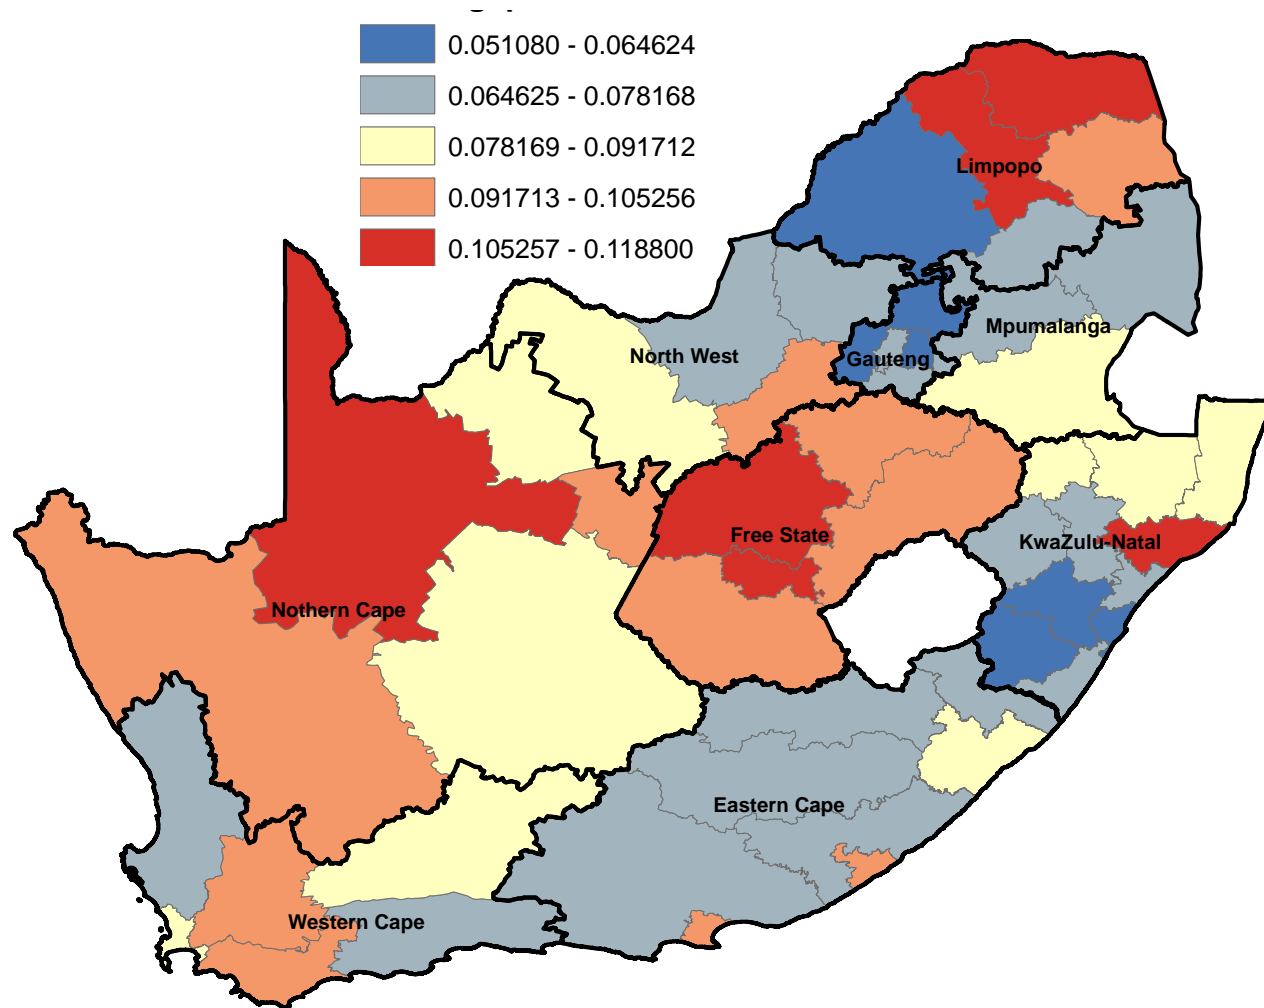



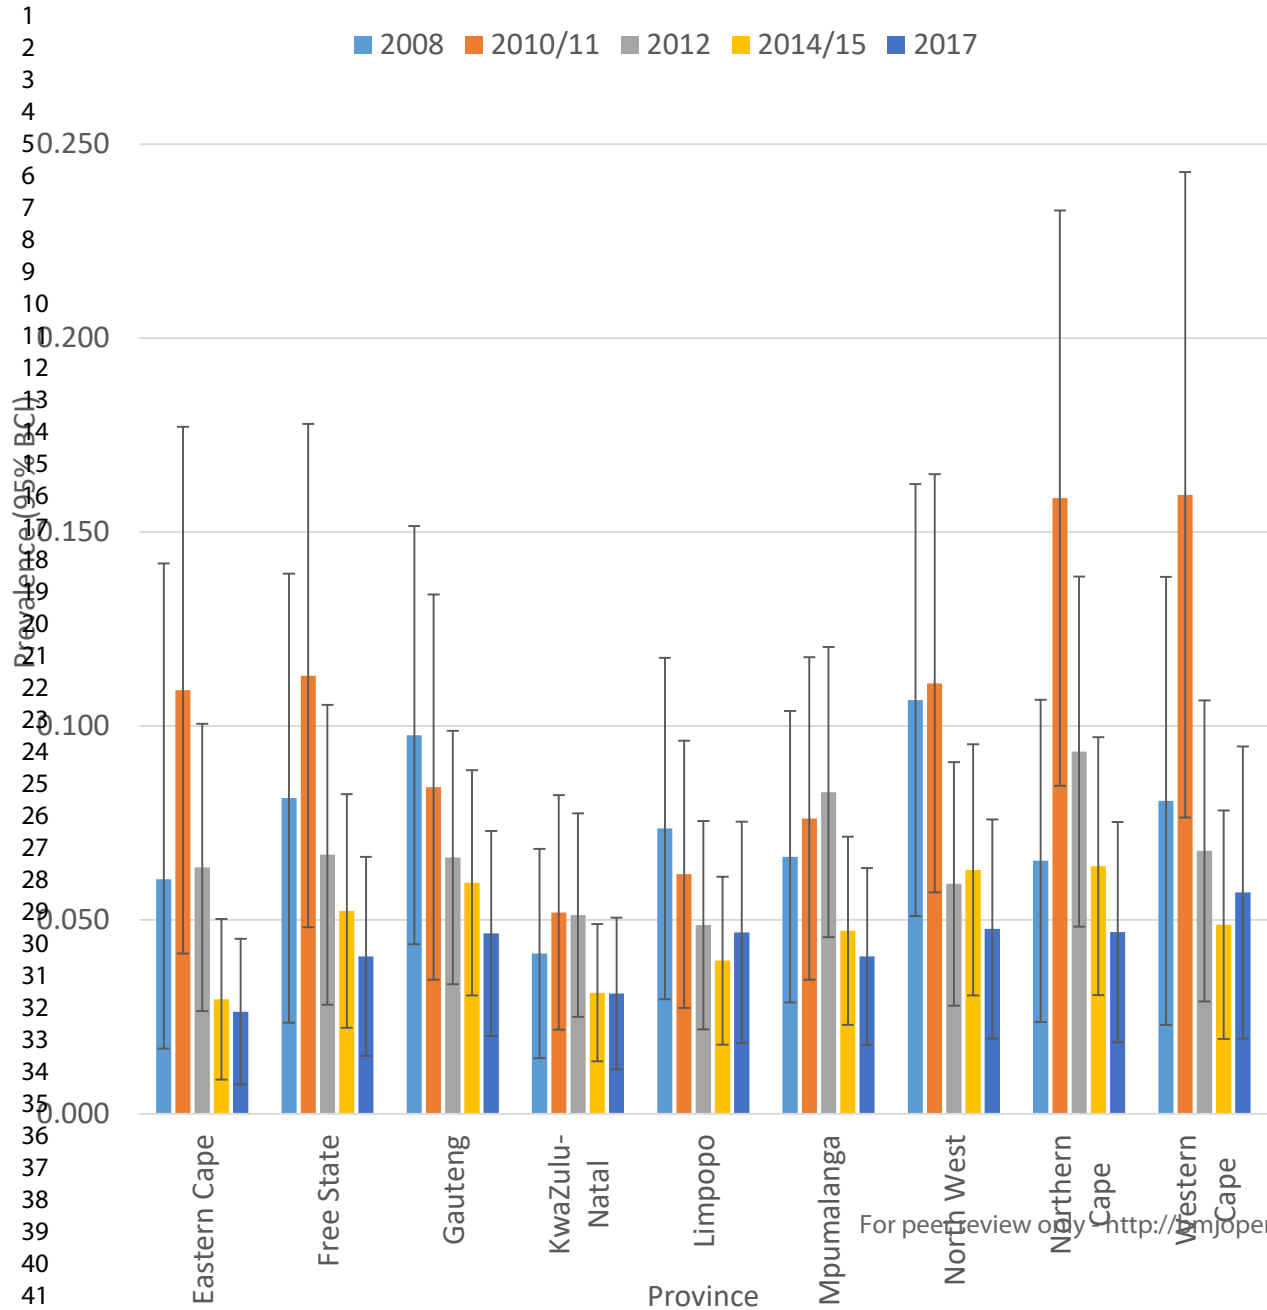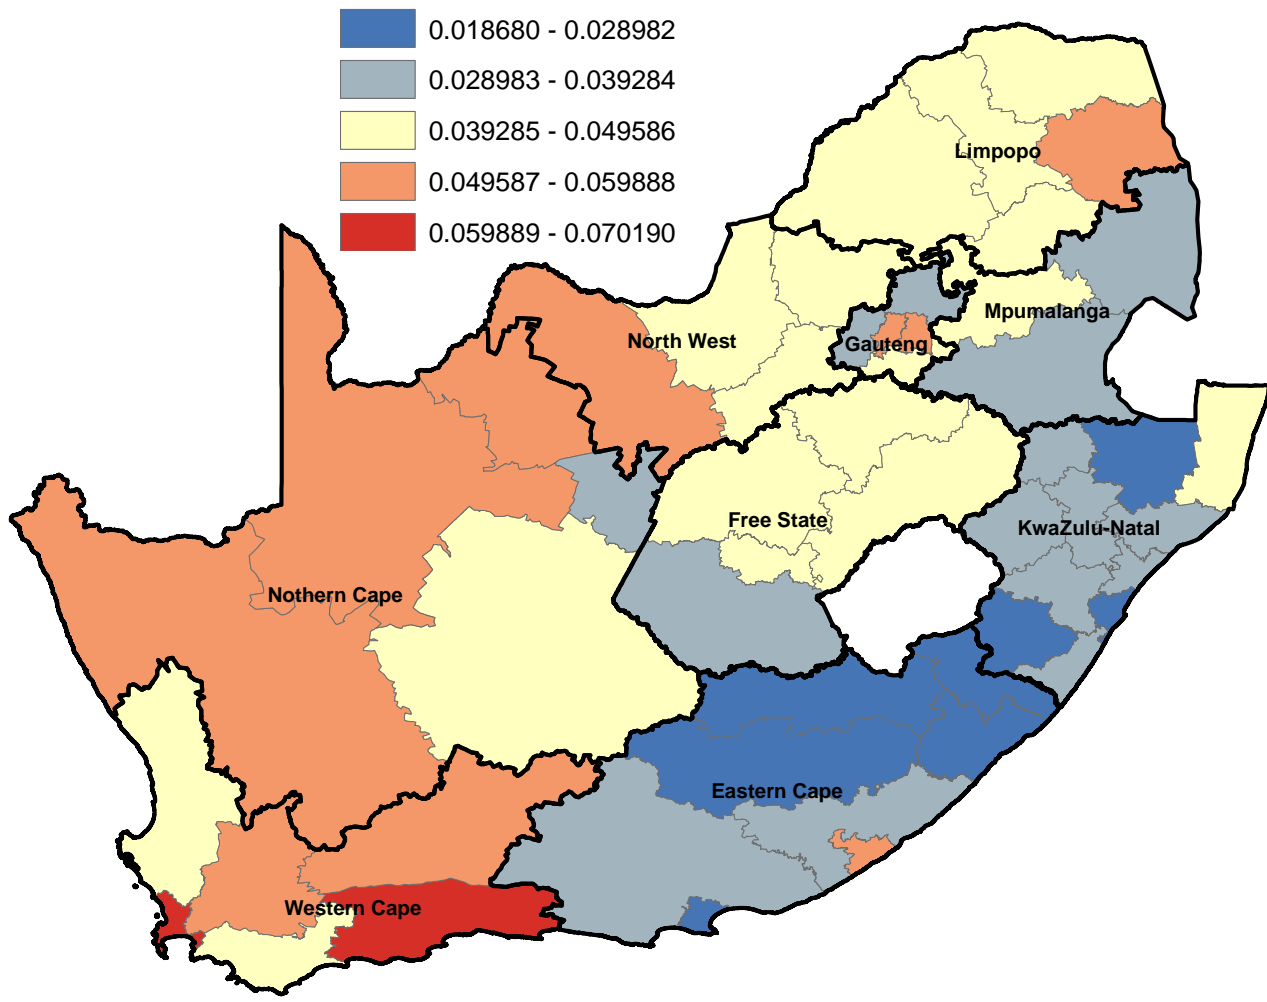

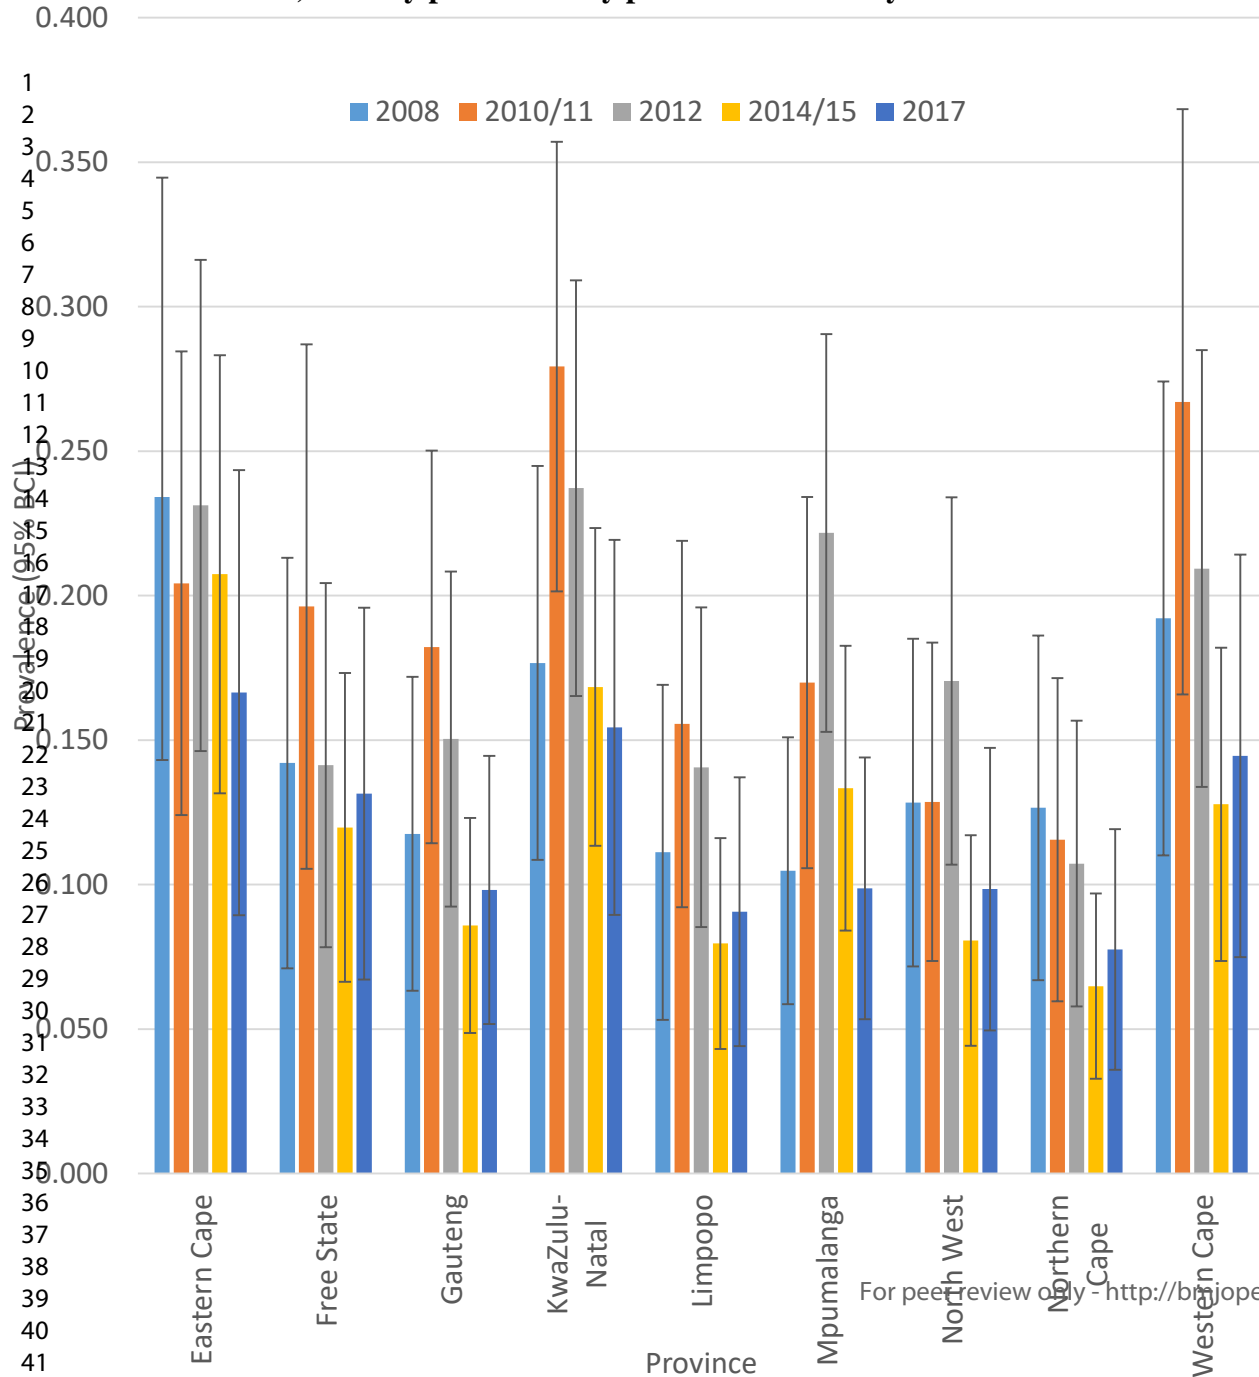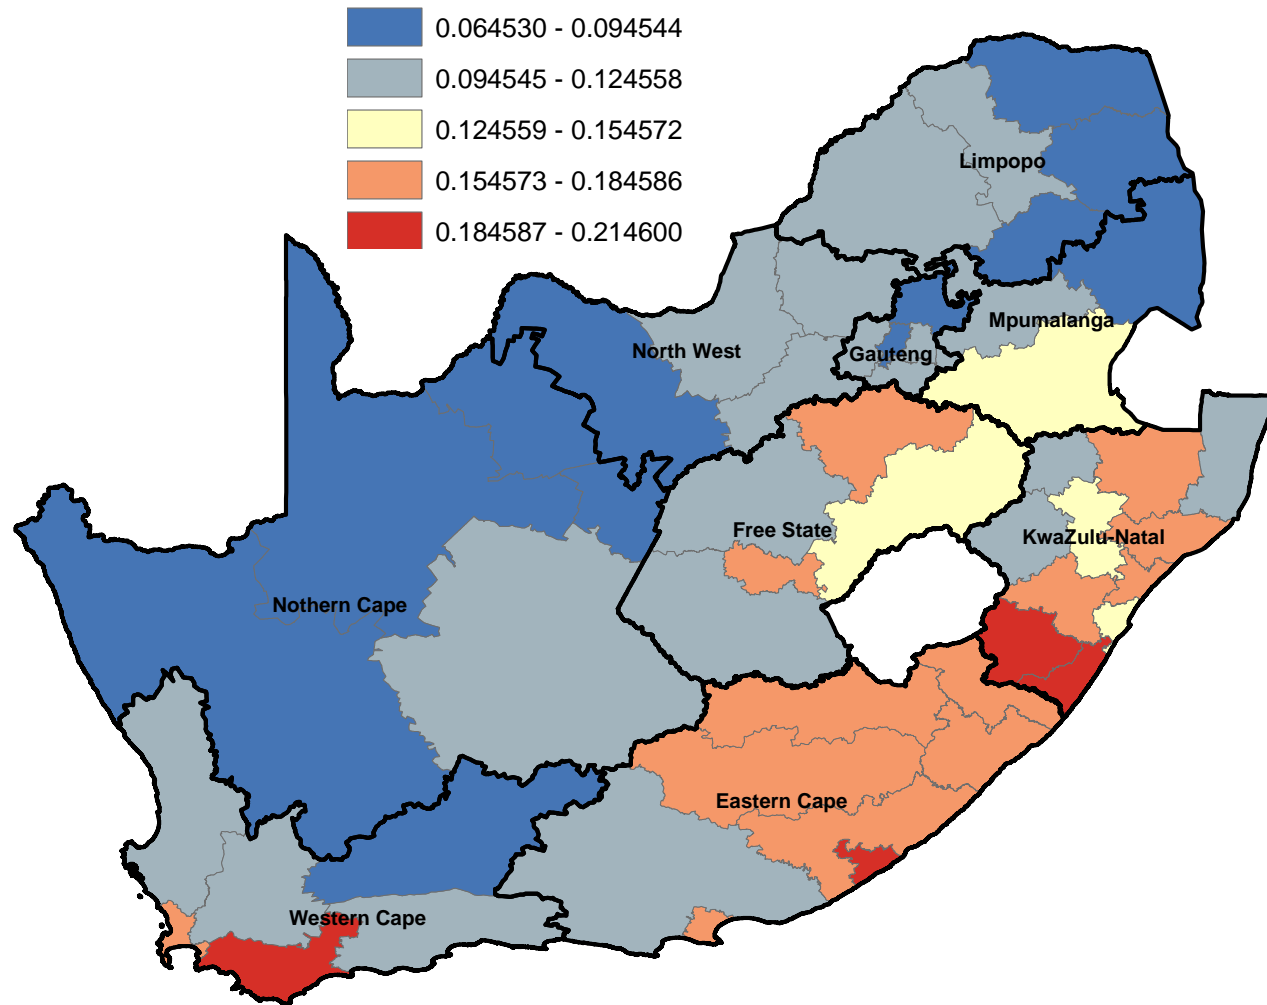

## Supplementary Material

### Supplementary 1: Spatial autocorrelation analyses for the 3 anthropometric outcomes (univariate and bivariate)

#### *Pairwise correlation for anthropometric outcomes and bivariate spatial autocorrelation*

We have performed additional supplementary analyses (using GeoDa: Anselin L, Syabri I, Kho Y. GeoDa: an introduction to spatial data analysis. Geographical analysis. 2006 Jan;38(1):5-22) which assesses pairwise correlation/association between the 3 outcomes as well as bivariate Moran's I to assess if there was significant spatial autocorrelation between the outcomes. This analysis suggests that there is no significant association between stunting and thinness/wasting while there is weak positive but significant spatial autocorrelation between stunting and obesity prevalence as well as weak negative spatial correlation between thinness and obesity (please see detailed analyses below).

```
. spearman stunted_svy thin_svy
Number of obs =      256
Spearman's rho =    0.0729
Test of Ho: stunted_svy and thin_svy are independent
    Prob > |t| =    0.2452
. gllamm stunted_svy thin_svy, i(id)
number of level 1 units = 256
number of level 2 units = 52
Condition Number = 14.594452
gllamm model
log likelihood = 283.93295
```

| stunted_svy       | Coef.           | Std. Err.       | z           | P> z         | [95% Conf. Interval] |                 |
|-------------------|-----------------|-----------------|-------------|--------------|----------------------|-----------------|
| <b>thin_svy  </b> | <b>.0385636</b> | <b>.0726234</b> | <b>0.53</b> | <b>0.595</b> | <b>-.1037757</b>     | <b>.1809028</b> |
| _cons             | .1082981        | .0061531        | 17.60       | 0.000        | .0962381             | .120358         |

```
Variance at level 1
.00637033 (.00056306)
Variances and covariances of random effects
***level 2 (id)
var(1): 2.643e-24 (5.133e-14)
```

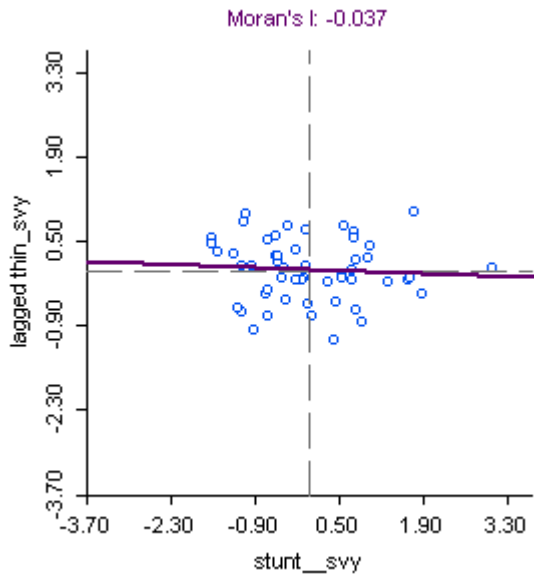

permutations: 99999  
 pseudo p-value: 0.290100

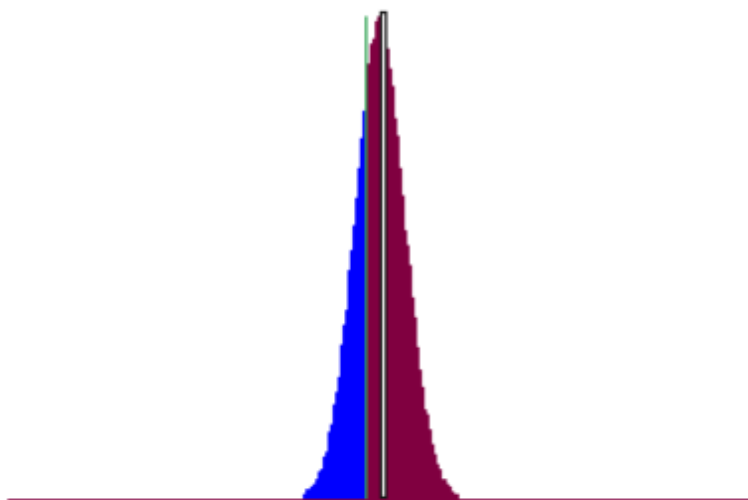

I: -0.0372 E[I]: -0.0196 mean: 0.0007 sd: 0.0690 z-value: -0.5492

```
. spearman stunted_svy obese_svy
```

```
Number of obs =      256
Spearman's rho =      0.2051
```

```
Test of Ho: stunted_svy and obese_svy are independent
Prob > |t| =          0.0010
```

```
. gllamm stunted_svy obese_svy , i(id)
```

```
number of level 1 units = 256
number of level 2 units = 52
```

```
Condition Number = 10.565877
```

```
gllamm model
```

```
log likelihood = 292.58012
```

| stunted_svy | Coef. | Std. Err. | z | P> z | [95% Conf. Interval] |
|-------------|-------|-----------|---|------|----------------------|
|-------------|-------|-----------|---|------|----------------------|

```

1
2
3      obese_svy | .1980684 .0475478 4.17 0.000 .1048765 .2912604
4      _cons | .0791266 .0090305 8.76 0.000 .0614272 .0968261

```

```

5 -----
6 Variance at level 1
7 -----

```

```

8      .00580379 (.00057983)
9

```

```

10 Variances and covariances of random effects
11 -----

```

```

12 ***level 2 (id)

```

```

13      var(1): .00015837 (.00029997)
14 -----

```

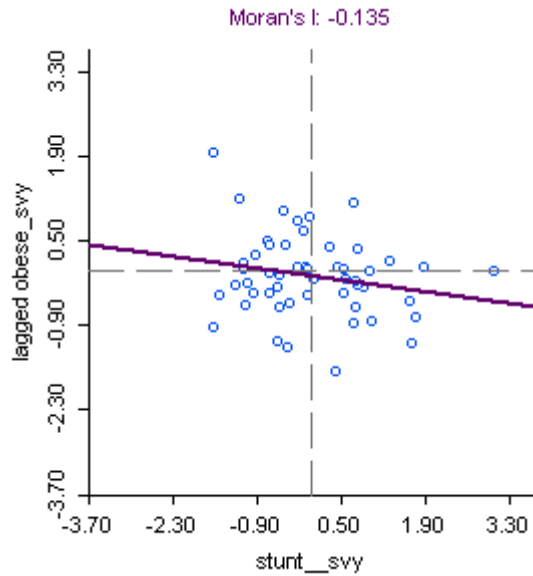

```

35 permutations: 99999

```

```

36 pseudo p-value: 0.025380

```

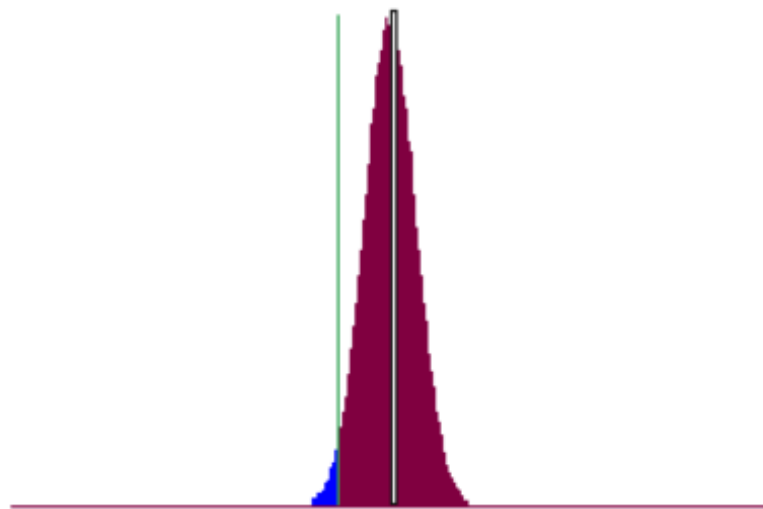

```

52 I: -0.1350 E[I]: -0.0196 mean: 0.0001 sd: 0.0689 z-value: -1.9600

```

```

53 . spearman thin_svy obese_svy

```

```

54 Number of obs = 256

```

```

55 Spearman's rho = -0.1424

```

```

56 Test of Ho: thin_svy and obese_svy are independent
57
58
59
60

```

Prob > |t| = 0.0227

. gllamm thin\_svy obese\_svy , i(id)

number of level 1 units = 256

number of level 2 units = 52

Condition Number = 10.976401

gllamm model

log likelihood = 324.36079

| thin_svy           | Coef.           | Std. Err.      | z            | P> z         | [95% Conf. Interval]      |
|--------------------|-----------------|----------------|--------------|--------------|---------------------------|
| <b>obese_svy  </b> | <b>-.067802</b> | <b>.040258</b> | <b>-1.68</b> | <b>0.092</b> | <b>-.1467062 .0111022</b> |
| _cons              | .0602269        | .0078037       | 7.72         | 0.000        | .0449319 .0755218         |

Variance at level 1

.00447574 (.00044278)

Variances and covariances of random effects

\*\*\*level 2 (id)

var(1): .00018259 (.00023176)

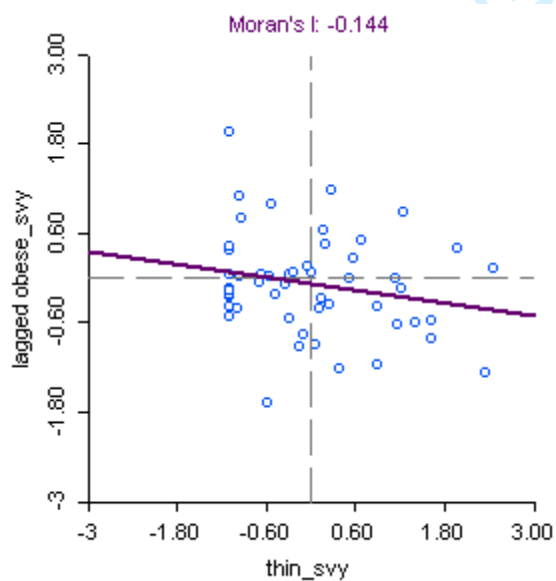

permutations: 99999  
 pseudo p-value: 0.020230

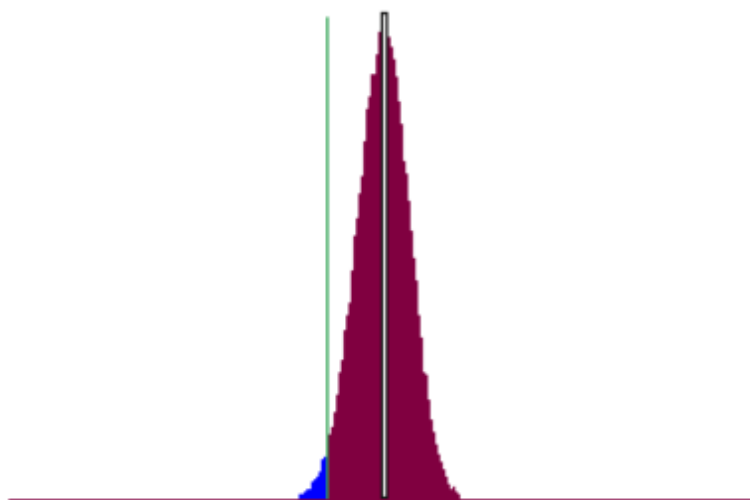

t: -0.1441 E[]: -0.0196 mean: 0.0057 sd: 0.0710 z-value: -2.1119

With regards to the shared temporal effect this we think can be retained as all 3 outcomes appear to have a negative coefficient associated with increasing panel or wave.

```
. gllamm stunted_svy year , i(id)
number of level 1 units = 256
number of level 2 units = 52
Condition Number = 31.724715
gllamm model
log likelihood = 293.64743
```

| stunted_svy | Coef.            | Std. Err.       | z            | P> z         | [95% Conf. Interval] |                  |
|-------------|------------------|-----------------|--------------|--------------|----------------------|------------------|
| year        | <b>-.0153423</b> | <b>.0033894</b> | <b>-4.53</b> | <b>0.000</b> | <b>-.0219855</b>     | <b>-.0086992</b> |
| _cons       | .1563577         | .0112694        | 13.87        | 0.000        | .1342702             | .1784453         |

```
-----
Variance at level 1
-----
.00590475 (.00052191)
Variances and covariances of random effects
-----
***level 2 (id)
var(1): 8.887e-19 (4.854e-11)
-----
. gllamm thin_svy year , i(id)
number of level 1 units = 256
number of level 2 units = 52
Condition Number = 37.175479
gllamm model
log likelihood = 327.11892
-----
```

```

1
2
3      thin_svy |      Coef.   Std. Err.    z    P>|z|    [95% Conf. Interval]
4 -----+-----
5      year |   -.0084373   .0028941   -2.92   0.004   -.0141096   -.002765
6      _cons |   .0749857   .0098979    7.58   0.000    .0555862    .0943852
7 -----+-----

```

Variance at level 1

.00430301 (.00042507)

Variances and covariances of random effects

\*\*\*level 2 (id)

var(1): .00027197 (.0002388)

. gllamm obese\_svy year , i(id)

number of level 1 units = 256

number of level 2 units = 52

Condition Number = 21.597249

gllamm model

log likelihood = 215.4003

```

27      obese_svy |      Coef.   Std. Err.    z    P>|z|    [95% Conf. Interval]
28 -----+-----
29      year |   -.0112194   .0043125   -2.60   0.009   -.0196717   -.0027671
30      _cons |   .1905201   .0155017   12.29   0.000    .1601374    .2209029
31 -----+-----

```

Variance at level 1

.00954712 (.00094327)

Variances and covariances of random effects

\*\*\*level 2 (id)

var(1): .00175973 (.00074487)

### ***Univariate spatial autocorrelation***

Based on the univariate Moran's I statistics for each anthropometric outcome there appeared to be significant spatial heterogeneity present for all 3 outcomes.



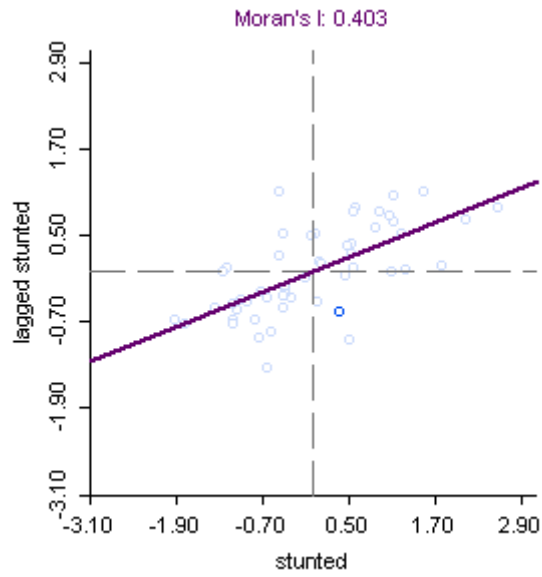

22  
23  
24  
25

permutations: 99999  
pseudo p-value: 0.000020

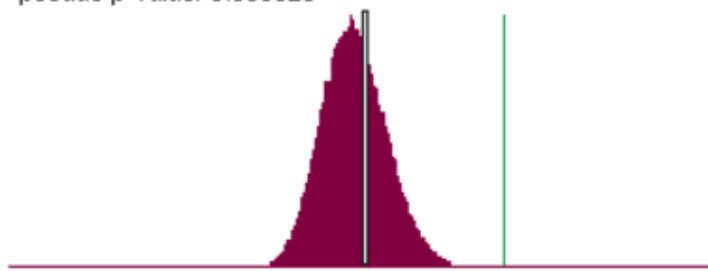

34  
35

I: 0.4027 E[I]: -0.0196 mean: -0.0202 sd: 0.0923 z-value: 4.5834

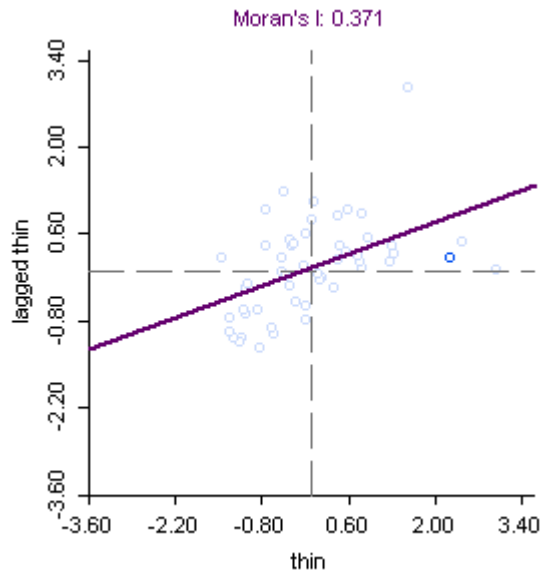

permutations: 99999  
 pseudo p-value: 0.000130

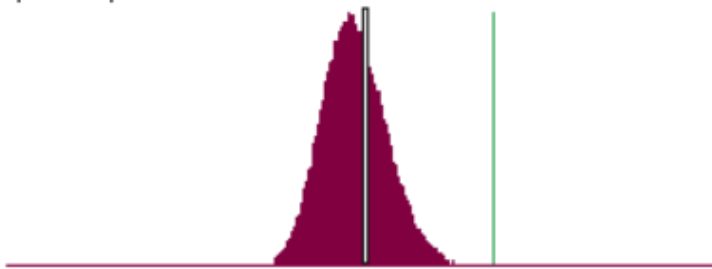

t: 0.3707 E[I]: -0.0196 mean: -0.0196 sd: 0.0916 z-value: 4.2602

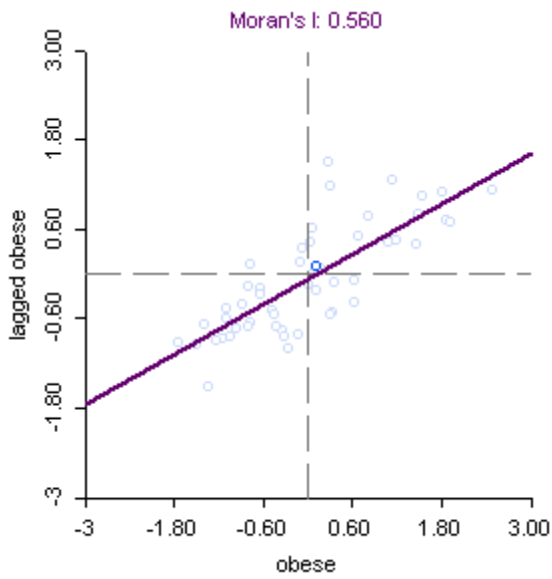

permutations: 99999  
 pseudo p-value: 0.000010

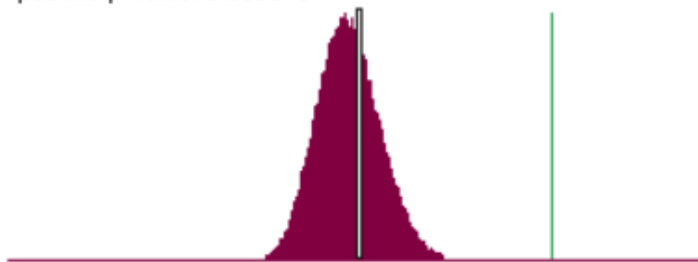

t: 0.5600 E[I]: -0.0196 mean: -0.0198 sd: 0.0918 z-value: 6.3149

**Supplementary 2:** Win BUGS code for Bayesian space-time binomial model

```

model {
  for (i in 1:N) {
    for (j in 1:T) {
      #Likelihood

      stunted[j,i] ~ dbin(p1[j,i],child[j,i])
      logit(p1[j,i])<-mediainter1+inter1[j]+theta.ST1[j,i]
    }
  }
}
    
```

```

1
2
3         thin[j,i] ~ dbin(p2[j,i],child[j,i])
4         logit(p2[j,i])<-mediainter2+inter2[j]+theta.ST2[j,i]
5
6         obese[j,i] ~ dbin(p3[j,i],child[j,i])
7         logit(p3[j,i])<-mediainter3+inter3[j]+theta.ST3[j,i]
8         }
9     }
10
11 #Spatio-temporal effect for the first wave
12     theta.S1[1,1:N]~car.normal(adj[],weights[],num[],prec.spat[1])
13     theta.S2[1,1:N]~car.normal(adj[],weights[],num[],prec.spat[2])
14     theta.S3[1,1:N]~car.normal(adj[],weights[],num[],prec.spat[3])
15
16     for(i in 1:N){
17         theta.ST1[1,i]<-pow(1-ro1*ro1,-0.5)*theta.S1[1,i]
18         theta.ST2[1,i]<-pow(1-ro2*ro2,-0.5)*theta.S2[1,i]
19         theta.ST3[1,i]<-pow(1-ro3*ro3,-0.5)*theta.S3[1,i]
20     }
21
22 #Spatio-temporal effect for the subsequent waves
23     for(j in 2:T){
24         for(i in 1:N){
25             theta.ST1[j,i]<-ro1*theta.ST1[j-1,i]+theta.S1[j,i]
26             theta.ST2[j,i]<-ro2*theta.ST2[j-1,i]+theta.S2[j,i]
27             theta.ST3[j,i]<-ro3*theta.ST3[j-1,i]+theta.S3[j,i]
28         }
29         theta.S1[j,1:N]~car.normal(adj[],weights[],num[],prec.spat[1])
30         theta.S2[j,1:N]~car.normal(adj[],weights[],num[],prec.spat[1])
31         theta.S3[j,1:N]~car.normal(adj[],weights[],num[],prec.spat[1])
32     }
33
34 #Weights for CAR
35     for(k in 1:240) {
36         weights[k]<-1
37     }
38
39 #Prior distributions for the global time trends
40     inter1[1:T]~car.normal(adj.t[],weights.t[],num.t[],prec.inter[1])
41     inter2[1:T]~car.normal(adj.t[],weights.t[],num.t[],prec.inter[2])
42     inter3[1:T]~car.normal(adj.t[],weights.t[],num.t[],prec.inter[3])
43
44     for (t in 1:1) {
45         weights.t[t] <- 1;
46         adj.t[t] <- t+1;
47         num.t[t] <- 1
48     }
49
50     for (t in 2:(T-1)) {
51         weights.t[2+(t-2)*2] <- 1;
52         adj.t[2+(t-2)*2] <- t-1
53         weights.t[3+(t-2)*2] <- 1;
54         adj.t[3+(t-2)*2] <- t+1;
55         num.t[t] <- 2
56     }
57
58     for (t in T:T) {
59         weights.t[(T-2)*2 + 2] <- 1;
60         adj.t[(T-2)*2 + 2] <- t-1;
61         num.t[t] <- 1
62     }

```

```
1
2
3 #Prior distributions for the precision parameters in the model
4 for(i in 1:3){
5     prec.spat[i]~dgamma(0.5, 0.005)
6     prec.inter[i]~dgamma(0.5, 0.005)
7 }
8
9 #Prior distributions for the mean risk for each outcome for every district and period
10 mediainter1~dflat()
11 mediainter2~dflat()
12 mediainter3~dflat()
13
14 #Prior distributions for the temporal dependence parameters for each outcome
15 ro1~dunif(-1,1)
16 ro2~dunif(-1,1)
17 ro3~dunif(-1,1)
18
19 }
20 }
```

### Supplementary 3: Model convergence

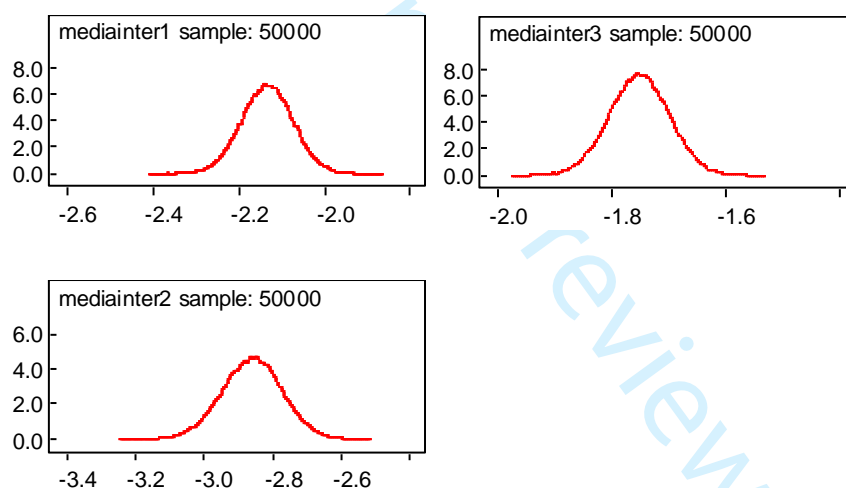

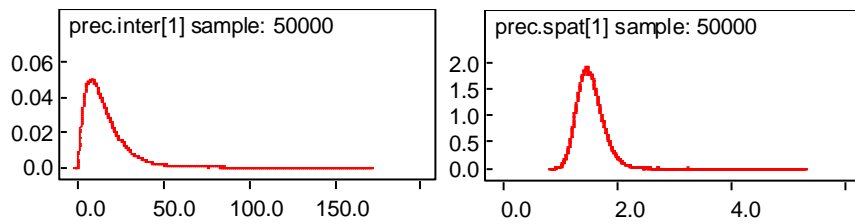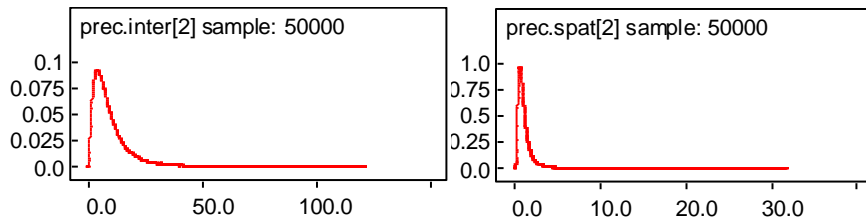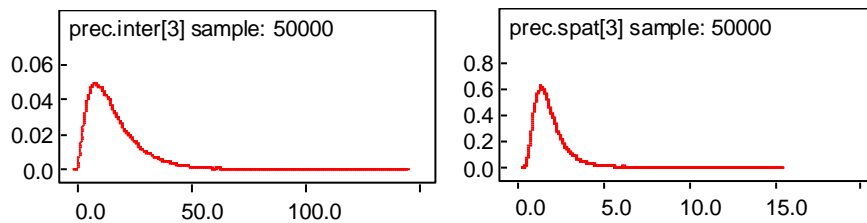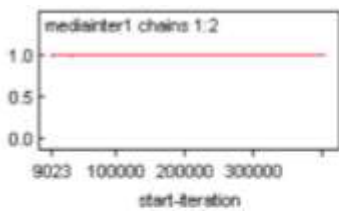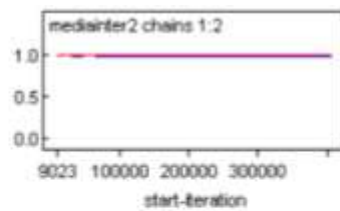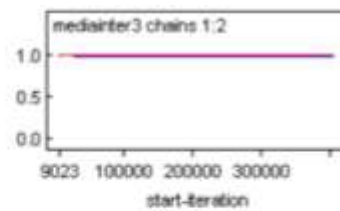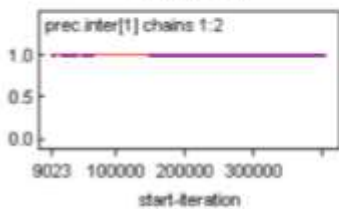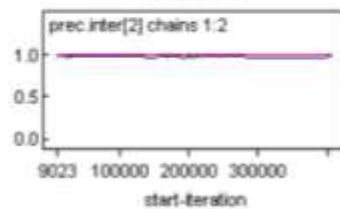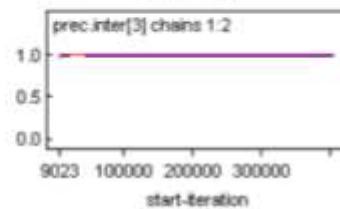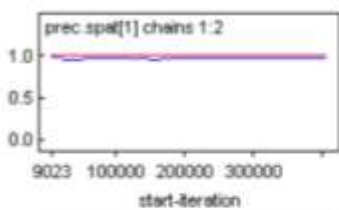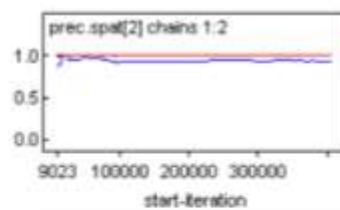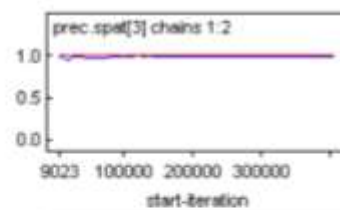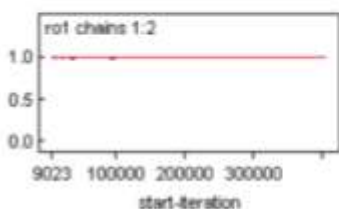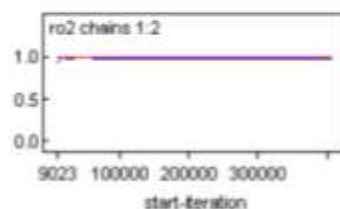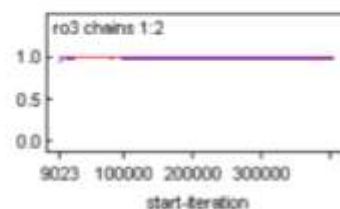

## Supplementary 4: Model fit and out of sample validation

### Overall model fit

Dbar = post.mean of -2logL; Dhat = -2LogL at post.mean of stochastic nodes

|         | Dbar     | Dhat     | pD      | DIC      |
|---------|----------|----------|---------|----------|
| obese   | 1140.710 | 1008.690 | 132.013 | 1272.720 |
| stunted | 1053.560 | 936.365  | 117.194 | 1170.750 |
| thin    | 719.774  | 636.974  | 82.800  | 802.574  |
| total   | 2914.040 | 2582.030 | 332.007 | 3246.050 |

### Comparison of survey prevalence versus model fitted prevalence by anthropometric measure

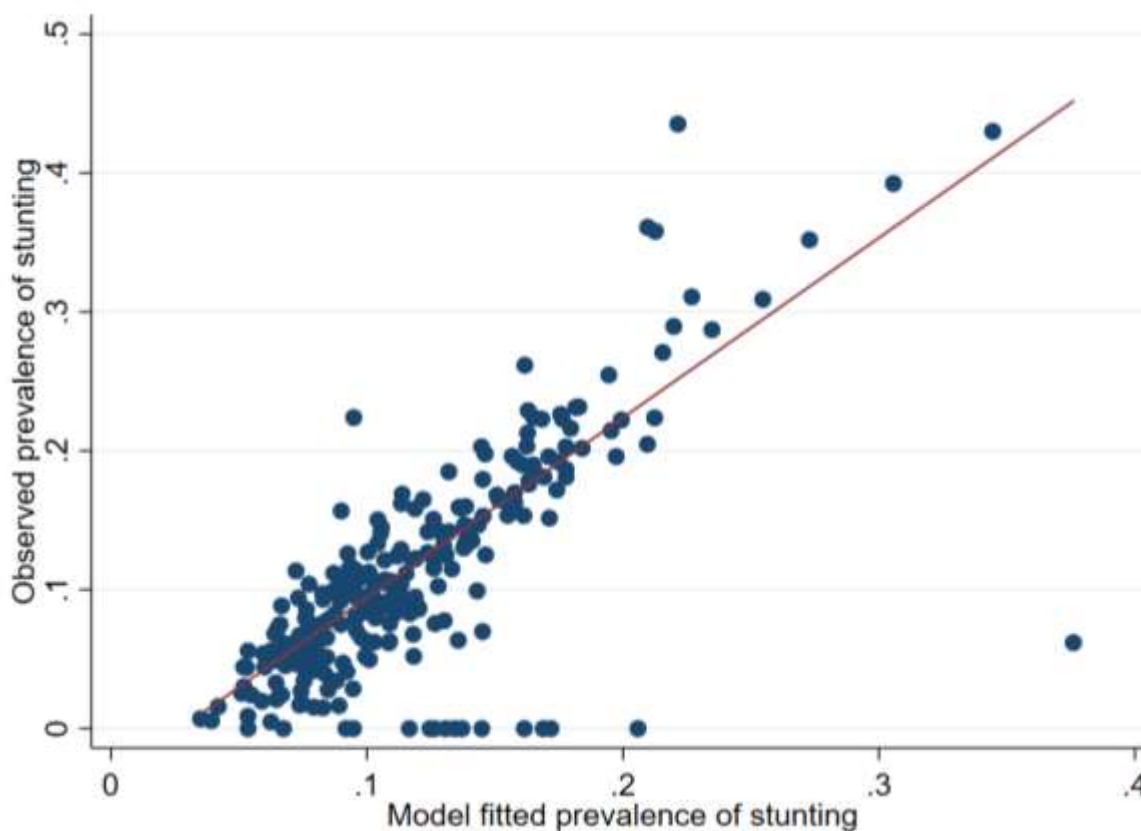

```
. spearman stunted_svy stunting_post if stunted_svy~=0
```

```
Number of obs =      241
Spearman's rho =      0.8601
```

```
Test of Ho: stunted_svy and stunting_post are independent
```

```
Prob > |t| =      0.0000
```

```
. spearman stunted_svy stunting_post
```

```
Number of obs =      256
Spearman's rho =      0.7287
```

```
Test of Ho: stunted_svy and stunting_post are independent
```

```
Prob > |t| =      0.0000
```

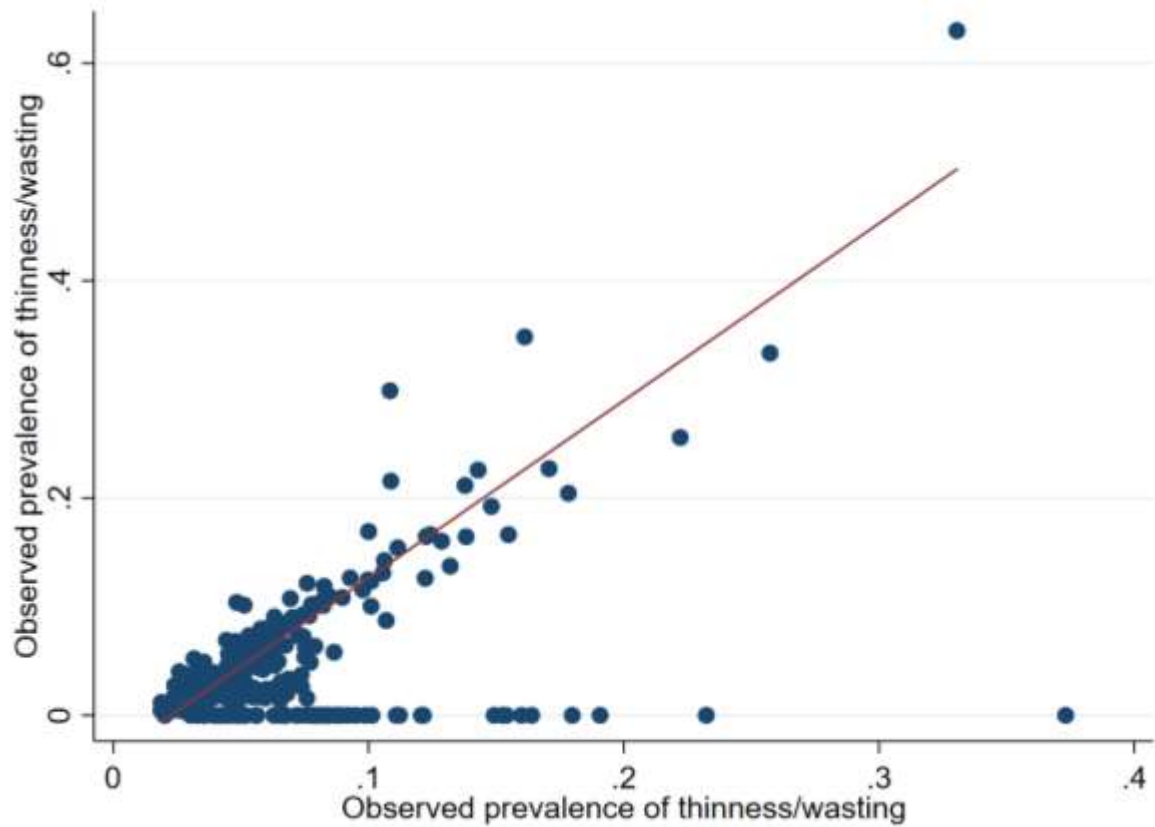

```

31 . spearman thin_svy thin_post if thin_svy~=0
32
33   Number of obs =      191
34   Spearman's rho =      0.8047
35
36   Test of Ho: thin_svy and thin_post are independent
37     Prob > |t| =      0.0000
38
39 . spearman thin_svy thin_post
40
41   Number of obs =      256
42   Spearman's rho =      0.2857
43
44   Test of Ho: thin_svy and thin_post are independent
45     Prob > |t| =      0.0000

```

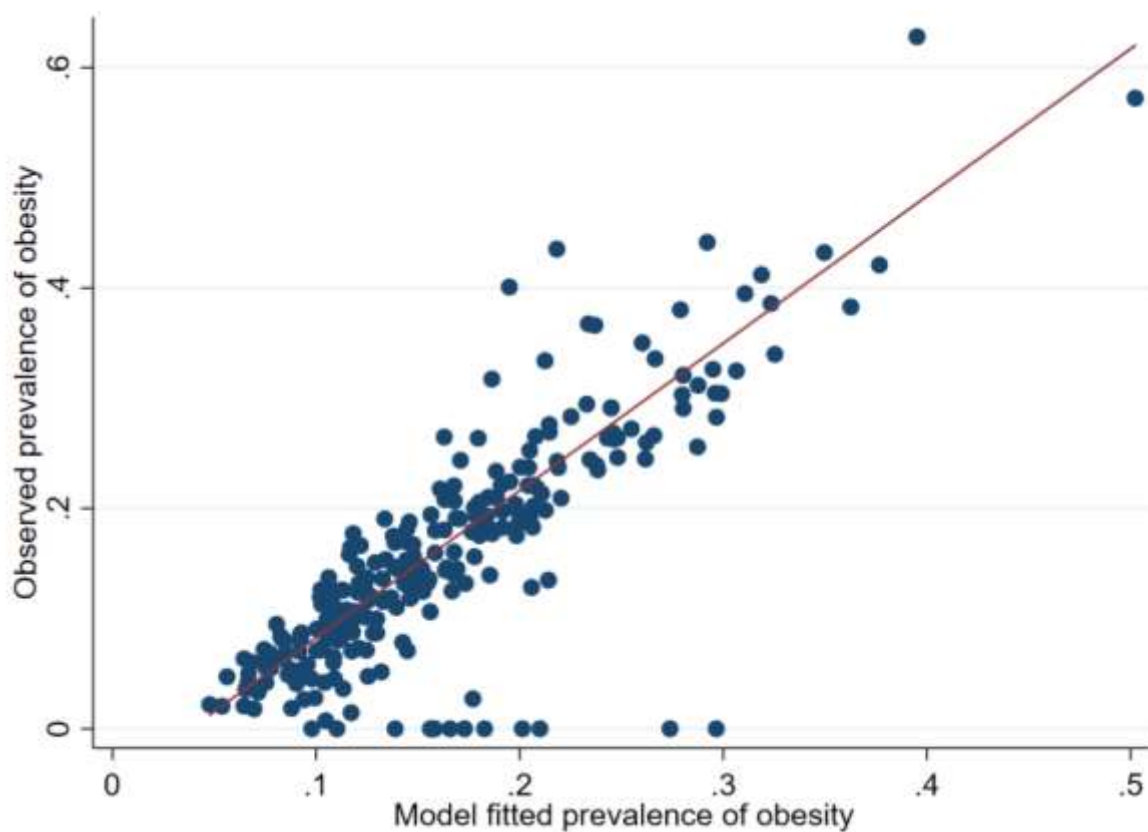

```

30 . spearman obese_svy obesity_post if obese_svy~=0
31
32 Number of obs =      243
33 Spearman's rho =      0.9140
34
35 Test of Ho: obese_svy and obesity_post are independent
36 Prob > |t| =      0.0000

```

```

37 . spearman obese_svy obesity_post
38
39 Number of obs =      256
40 Spearman's rho =      0.8002
41
42 Test of Ho: obese_svy and obesity_post are independent
43 Prob > |t| =      0.0000

```

44 *Out of sample validation/prediction (10% random sample)*

45  
46 Of the 37 out of sample validation points, 28 of the observed prevalence of stunting were within the 95%  
47 uncertainty interval for the predicted posterior prevalence, 25/37 for thin/wasted and 30/37 for obesity.

```

48
49 . spearman stunted_svy stuntedvpost if validation_sample2==1
50
51 Number of obs =      37
52 Spearman's rho =      0.4445
53
54 Test of Ho: stunted_svy and stuntedvpost are independent
55 Prob > |t| =      0.0058
56
57
58
59
60

```



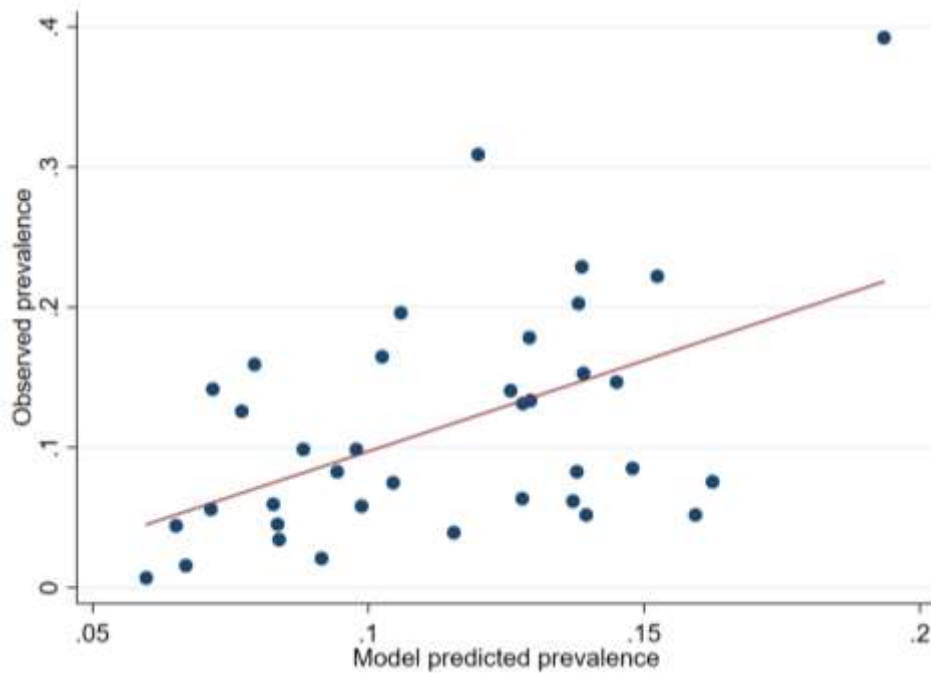

24 . spearman thin\_svy thinvpost if validation\_sample2==1

25  
26 Number of obs = 37  
27 Spearman's rho = 0.2048

28 Test of Ho: thin\_svy and thinvpost are independent  
29 Prob > |t| = 0.2239

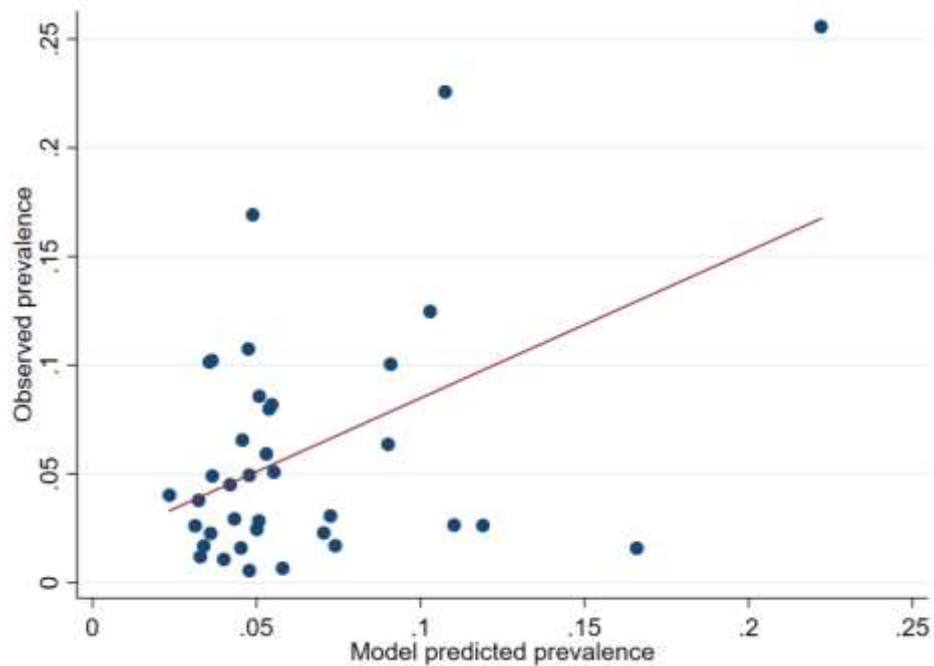

51 . spearman thin\_svy thinvpost if validation\_sample2==1 & thin\_svy~=0

52  
53 Number of obs = 37  
54 Spearman's rho = 0.2048

55 Test of Ho: thin\_svy and thinvpost are independent  
56 Prob > |t| = 0.2239

57  
58  
59  
60

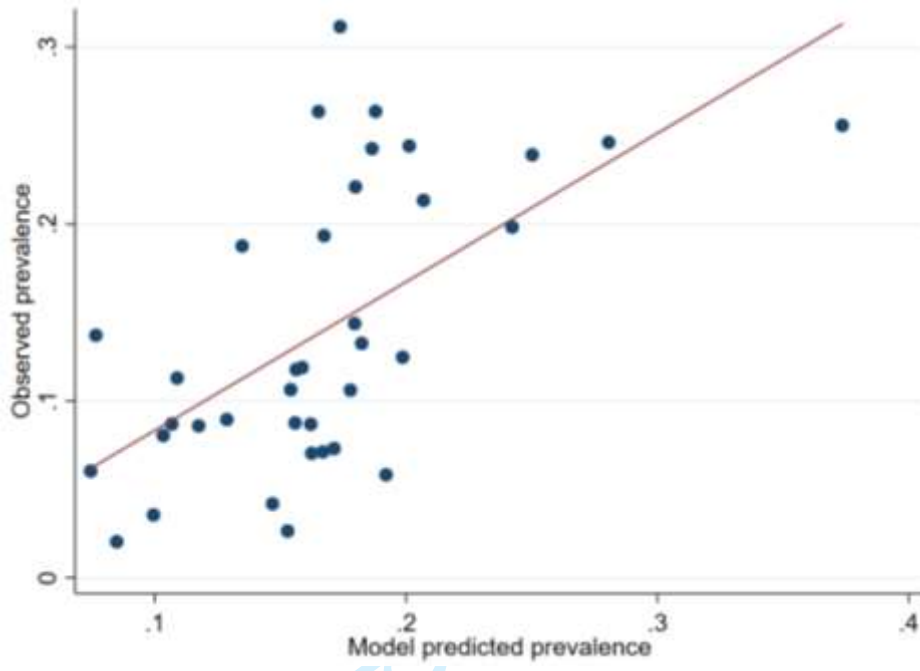

**Supplementary 5: Description of the study sample across survey rounds**

| Survey wave    | Age (in years) | Sampled | Estimated population size using survey weights | 95% CI  |         | % sampled with height/weight measurement |
|----------------|----------------|---------|------------------------------------------------|---------|---------|------------------------------------------|
| <b>2008</b>    | 0              | 661     | 1092027                                        | 948199  | 1235854 | 35.9%                                    |
|                | 1              | 661     | 1151665                                        | 1009086 | 1294244 | 67.9%                                    |
|                | 2              | 670     | 1088458                                        | 960285  | 1216632 | 71.0%                                    |
|                | 3              | 642     | 1034244                                        | 902011  | 1166477 | 81.0%                                    |
|                | 4              | 620     | 1016227                                        | 882185  | 1150270 | 83.5%                                    |
|                | <5             | 3254    | 5382621                                        | 5005478 | 5759764 |                                          |
| <b>2010/11</b> | 0              | 517     | 866786                                         | 720440  | 1013132 | 16.2%                                    |
|                | 1              | 621     | 1032184                                        | 840129  | 1224239 | 42.5%                                    |
|                | 2              | 751     | 1225419                                        | 1040085 | 1410753 | 49.3%                                    |
|                | 3              | 840     | 1206389                                        | 1026681 | 1386097 | 53.3%                                    |
|                | 4              | 820     | 1196800                                        | 1031500 | 1362101 | 53.3%                                    |
|                | <5             | 3549    | 5527578                                        | 4914106 | 6141050 |                                          |
| <b>2012</b>    | 0              | 652     | 902357                                         | 777704  | 1027010 | 45.1%                                    |
|                | 1              | 691     | 1039354                                        | 887868  | 1190839 | 87.7%                                    |
|                | 2              | 764     | 1183609                                        | 995508  | 1371711 | 87.6%                                    |
|                | 3              | 826     | 1257820                                        | 1036042 | 1479598 | 89.6%                                    |
|                | 4              | 909     | 1405034                                        | 1191438 | 1618631 | 87.3%                                    |
|                | <5             | 3842    | 5788174                                        | 5112765 | 6463583 |                                          |
| <b>2014/15</b> | 0              | 886     | 1185863                                        | 1003941 | 1367786 | 50.3%                                    |
|                | 1              | 875     | 1162949                                        | 985828  | 1340070 | 92.9%                                    |
|                | 2              | 863     | 1060232                                        | 901257  | 1219207 | 92.7%                                    |
|                | 3              | 914     | 1160946                                        | 985127  | 1336765 | 94.0%                                    |
|                | 4              | 960     | 1298110                                        | 1098342 | 1497879 | 94.3%                                    |
|                | <5             | 4498    | 5868101                                        | 5200170 | 6536031 |                                          |
| <b>2017</b>    | 0              | 813     | 987763                                         | 841487  | 1134040 | 47.8%                                    |
|                | 1              | 909     | 1215360                                        | 1045099 | 1385622 | 86.4%                                    |
|                | 2              | 996     | 1293408                                        | 1105038 | 1481779 | 84.6%                                    |
|                | 3              | 992     | 1264427                                        | 1088783 | 1440071 | 88.9%                                    |
|                | 4              | 1000    | 1129184                                        | 973431  | 1284937 | 90.4%                                    |
|                | <5             | 4710    | 5890142                                        | 5261158 | 6519126 |                                          |

**Supplementary 6: Sensitivity analyses for missing weight and height**

Summary: A comparison of missing weight/height proportions by various socio-demographic variables suggests that many were likely missing at random. Distributions of race, gender, household income, low birthweight, food security status, mother education category and father education category were not significantly different when comparing children with missing weight/height measurements to those with a valid weight/height measurement (please see analysis output below). However, age did significantly differ by missing status in that infants (<1 year of age) were significantly more likely to have a missing weight/height measurement compared to children aged 1-4 years. There also appeared to be significant differences in missing weight/height status by province of residence i.e. children in Mpumalanga, Western Cape for example had higher proportions of missing weight/height measurements among children under 5 ( $p < 0.001$ ). Furthermore, missing weight/height measurements for children were more significantly more likely among those children with younger mothers (<25 years of age).

```
. svy: tab race_missing_height_weight if race_~0, row ci
(running tabulate on estimation sample)
```

|                  |   |       |                 |   |            |
|------------------|---|-------|-----------------|---|------------|
| Number of strata | = | 53    | Number of obs   | = | 16,649     |
| Number of PSUs   | = | 1,076 | Population size | = | 25,331,414 |
|                  |   |       | Design df       | = | 1,023      |

```

-----
      race_ |           missing_height_weight
            |           0           1           Total
-----+-----
      African |           .8129           .1871           1
            | [.8006, .8246] [.1754, .1994]
-----+-----
      Coloured |           .7803           .2197           1
            | [.7437, .8129] [.1871, .2563]
-----+-----
      Asian/In |           .7593           .2407           1
            | [.5708, .882]  [.118, .4292]
-----+-----
      White |           .74           .26           1
            | [.643, .8182] [.1818, .357]
-----+-----
      Total |           .8066           .1934           1
            | [.7945, .8181] [.1819, .2055]
-----

```

Key: row proportion  
[95% confidence interval for row proportion]

Pearson:  
Uncorrected chi2(3) = 32.5162  
Design-based F(2.49, 2551.53) = 1.7810 P = 0.1588

. svy: tab gender\_missing\_height\_weight if race\_~=0, row ci  
(running tabulate on estimation sample)

Number of strata = 53                      Number of obs = 19,138  
Number of PSUs = 1,218                  Population size = 28,354,881  
Design df = 1,165

```

-----
      gender_ |           missing_height_weight
              |           0           1           Total
-----+-----
      Male |           .8065           .1935           1
            | [.7926, .8196] [.1804, .2074]
-----+-----
      Female |           .8102           .1898           1
            | [.7951, .8245] [.1755, .2049]
-----+-----
      Total |           .8083           .1917           1
            | [.7972, .819]  [.181, .2028]
-----

```

Key: row proportion  
[95% confidence interval for row proportion]

Pearson:  
Uncorrected chi2(1) = 0.4400  
Design-based F(1, 1165) = 0.1697 P = 0.6805

. svy: tab age\_missing\_height\_weight, row ci  
(running tabulate on estimation sample)

Number of strata = 53                      Number of obs = 19,201  
Number of PSUs = 1,227                  Population size = 28,456,616  
Design df = 1,174

```

-----
      age_ |           missing_height_weight
           |           0           1           Total
-----+-----
      0 |           .4596           .5404           1
        | [.4362, .4832] [.5168, .5638]
-----+-----
      1 |           .8581           .1419           1
        | [.8308, .8816] [.1184, .1692]
-----+-----
      2 |           .8764           .1236           1
        | [.8573, .8933] [.1067, .1427]
-----+-----
      3 |           .8952           .1048           1
        | [.8726, .9142] [.0858, .1274]
-----

```

1  
2  
3  
4  
5  
6  
7  
8  
9  
10  
11  
12  
13  
14  
15  
16  
17  
18  
19  
20  
21  
22  
23  
24  
25  
26  
27  
28  
29  
30  
31  
32  
33  
34  
35  
36  
37  
38  
39  
40  
41  
42  
43  
44  
45  
46  
47  
48  
49  
50  
51  
52  
53  
54  
55  
56  
57  
58  
59  
60

|       |  |                |                |   |
|-------|--|----------------|----------------|---|
| 4     |  | .9015          | .0985          | 1 |
|       |  | [.8847, .916]  | [.084, .1153]  |   |
| Total |  | .8083          | .1917          | 1 |
|       |  | [.7972, .8189] | [.1811, .2028] |   |

-----  
Key: row proportion  
[95% confidence interval for row proportion]

Pearson:  
Uncorrected chi2(4) = 3267.7805  
Design-based F(3.41, 3999.27) = 238.9174 P = 0.0000

. svy: tab hh\_inc missing\_height\_weight, row ci  
(running tabulate on estimation sample)

|                  |   |       |                 |   |            |
|------------------|---|-------|-----------------|---|------------|
| Number of strata | = | 53    | Number of obs   | = | 18,289     |
| Number of PSUs   | = | 1,195 | Population size | = | 26,887,499 |
|                  |   |       | Design df       | = | 1,142      |

| hh_inc | missing_height_weight |                | Total |
|--------|-----------------------|----------------|-------|
|        | 0                     | 1              |       |
| 1      | .8032                 | .1968          | 1     |
|        | [.7792, .8251]        | [.1749, .2208] |       |
| 2      | .8286                 | .1714          | 1     |
|        | [.8012, .853]         | [.147, .1988]  |       |
| 3      | .8289                 | .1711          | 1     |
|        | [.8084, .8475]        | [.1525, .1916] |       |
| 4      | .8076                 | .1924          | 1     |
|        | [.7751, .8365]        | [.1635, .2249] |       |
| 5      | .7862                 | .2138          | 1     |
|        | [.7578, .812]         | [.188, .2422]  |       |
| Total  | .8096                 | .1904          | 1     |
|        | [.7982, .8205]        | [.1795, .2018] |       |

-----  
Key: row proportion  
[95% confidence interval for row proportion]

Pearson:  
Uncorrected chi2(4) = 32.2620  
Design-based F(3.67, 4186.36) = 1.9756 P = 0.1017

. svy: tab province missing\_height\_weight, row ci  
(running tabulate on estimation sample)

|                  |   |       |                 |   |            |
|------------------|---|-------|-----------------|---|------------|
| Number of strata | = | 53    | Number of obs   | = | 19,201     |
| Number of PSUs   | = | 1,227 | Population size | = | 28,456,616 |
|                  |   |       | Design df       | = | 1,174      |

| province | missing_height_weight |                | Total |
|----------|-----------------------|----------------|-------|
|          | 0                     | 1              |       |
| Eastern  | .8421                 | .1579          | 1     |
|          | [.819, .8627]         | [.1373, .181]  |       |
| Free Sta | .833                  | .167           | 1     |
|          | [.7968, .8638]        | [.1362, .2032] |       |
| Gauteng  | .7866                 | .2134          | 1     |
|          | [.7637, .8078]        | [.1922, .2363] |       |
| KwaZulu- | .8448                 | .1552          | 1     |
|          | [.8255, .8624]        | [.1376, .1745] |       |
| Limpopo  | .8422                 | .1578          | 1     |
|          | [.8184, .8634]        | [.1366, .1816] |       |
| Mpumalan | .7557                 | .2443          | 1     |
|          | [.7187, .7892]        | [.2108, .2813] |       |

| North We |  | .8011          | .1989          | 1 |
|----------|--|----------------|----------------|---|
|          |  | [.7725, .827]  | [.173, .2275]  |   |
| Northern |  | .7921          | .2079          | 1 |
|          |  | [.7674, .8149] | [.1851, .2326] |   |
| Western  |  | .7422          | .2578          | 1 |
|          |  | [.7064, .775]  | [.225, .2936]  |   |
| Total    |  | .8083          | .1917          | 1 |
|          |  | [.7972, .8189] | [.1811, .2028] |   |

Key: row proportion  
[95% confidence interval for row proportion]

Pearson:  
Uncorrected chi2(8) = 171.9467  
Design-based F(6.89, 8090.45) = 9.8218 P = 0.0000

. svy: tab LBW missing\_height\_weight, row ci  
(running tabulate on estimation sample)

Number of strata = 53                      Number of obs = 16,606  
Number of PSUs = 1,128                  Population size = 24,829,511  
Design df = 1,075

| LBW   | missing_height_weight |                | Total |
|-------|-----------------------|----------------|-------|
|       | 0                     | 1              |       |
| 0     | .8164                 | .1836          | 1     |
|       | [.8044, .8278]        | [.1722, .1956] |       |
| 1     | .8106                 | .1894          | 1     |
|       | [.7788, .8388]        | [.1612, .2212] |       |
| Total | .8158                 | .1842          | 1     |
|       | [.8045, .8266]        | [.1734, .1955] |       |

Key: row proportion  
[95% confidence interval for row proportion]

Pearson:  
Uncorrected chi2(1) = 0.3369  
Design-based F(1, 1075) = 0.1307 P = 0.7178

. svy: tab foodsecurity\_proxy missing\_height\_weight, row ci  
(running tabulate on estimation sample)

Number of strata = 53                      Number of obs = 5,017  
Number of PSUs = 438                      Population size = 8,843,019  
Design df = 385

| foodsecur<br>ity_proxy | missing_height_weight |                | Total |
|------------------------|-----------------------|----------------|-------|
|                        | 0                     | 1              |       |
| 1                      | .7719                 | .2281          | 1     |
|                        | [.7467, .7952]        | [.2048, .2533] |       |
| 2                      | .8019                 | .1981          | 1     |
|                        | [.7352, .8551]        | [.1449, .2648] |       |
| 3                      | .7596                 | .2404          | 1     |
|                        | [.6983, .8119]        | [.1881, .3017] |       |
| 4                      | .8284                 | .1716          | 1     |
|                        | [.7561, .8825]        | [.1175, .2439] |       |
| 5                      | .7869                 | .2131          | 1     |
|                        | [.6923, .8583]        | [.1417, .3077] |       |
| Total                  | .7751                 | .2249          | 1     |
|                        | [.753, .7959]         | [.2041, .247]  |       |

Key: row proportion

[95% confidence interval for row proportion]

Pearson:

Uncorrected  $\chi^2(4) = 6.4682$   
 Design-based  $F(3.04, 1168.67) = 0.8267$  P = 0.4803

. svy: tab mthagegrp missing\_height\_weight, row ci  
 (running tabulate on estimation sample)

Number of strata = 53                      Number of obs = 17,335  
 Number of PSUs = 1,192                  Population size = 26,432,345  
                                                                                  Design df = 1,139

| RECODE of<br>mth_age_f<br>inal | missing_height_weight   |                         | Total |
|--------------------------------|-------------------------|-------------------------|-------|
|                                | 0                       | 1                       |       |
| 1                              | .6691<br>[.628, .7077]  | .3309<br>[.2923, .372]  | 1     |
| 2                              | .7787<br>[.7553, .8004] | .2213<br>[.1996, .2447] | 1     |
| 3                              | .8128<br>[.7961, .8285] | .1872<br>[.1715, .2039] | 1     |
| 4                              | .8329<br>[.8096, .8539] | .1671<br>[.1461, .1904] | 1     |
| 5                              | .8629<br>[.7939, .9113] | .1371<br>[.0887, .2061] | 1     |
| Total                          | .8006<br>[.7894, .8115] | .1994<br>[.1885, .2106] | 1     |

Key: row proportion  
 [95% confidence interval for row proportion]

Pearson:

Uncorrected  $\chi^2(4) = 169.4906$   
 Design-based  $F(3.89, 4436.22) = 15.6564$  P = 0.0000

. svy: tab mth\_edu2 missing\_height\_weight, row ci  
 (running tabulate on estimation sample)

Number of strata = 53                      Number of obs = 16,352  
 Number of PSUs = 1,169                  Population size = 25,254,660  
                                                                                  Design df = 1,116

| mth_edu2 | missing_height_weight   |                         | Total |
|----------|-------------------------|-------------------------|-------|
|          | 0                       | 1                       |       |
| 0        | .8043<br>[.7537, .8466] | .1957<br>[.1534, .2463] | 1     |
| 1        | .7848<br>[.7529, .8136] | .2152<br>[.1864, .2471] | 1     |
| 2        | .7976<br>[.7848, .8098] | .2024<br>[.1902, .2152] | 1     |
| 3        | .8122<br>[.7734, .8457] | .1878<br>[.1543, .2266] | 1     |
| Total    | .7982<br>[.7868, .8092] | .2018<br>[.1908, .2132] | 1     |

Key: row proportion  
 [95% confidence interval for row proportion]

Pearson:

Uncorrected  $\chi^2(3) = 3.7648$   
 Design-based  $F(2.41, 2688.60) = 0.5454$  P = 0.6124

. svy: tab fth\_educat missing\_height\_weight, row ci







1

2

|    |               |                                  |   |         |         |        |         |          |         |        |         |         |        |
|----|---------------|----------------------------------|---|---------|---------|--------|---------|----------|---------|--------|---------|---------|--------|
| 3  | Western Cape  | Cape Winelands(DC2 )             | 2 | 0.1203  | 0.06752 | 0.1894 | 0.1783  | 0.1046   | 0.2718  | 1      | 0.2458  | 0.1623  | 0.3432 |
| 4  | Free State    | Fezile Dabi(DC20 )               | 2 | 0.1615  | 0.0772  | 0.2855 | 0.1108  | 0.04032  | 0.237   | 0.9349 | 0.1853  | 0.1018  | 0.2942 |
| 5  | KwaZulu-Natal | Ugu(DC21 )                       | 2 | 0.1778  | 0.1186  | 0.2481 | 0.04676 | 0.02163  | 0.08407 | 0.3704 | 0.3626  | 0.2788  | 0.4518 |
| 6  | KwaZulu-Natal | UMgungundlovu(DC22 )             | 2 | 0.1764  | 0.1122  | 0.2555 | 0.05619 | 0.02232  | 0.1151  | 0.5322 | 0.2058  | 0.1353  | 0.2888 |
| 7  | KwaZulu-Natal | Uthukela(DC23 )                  | 2 | 0.1069  | 0.06915 | 0.1536 | 0.03332 | 0.01643  | 0.05773 | 0.0719 | 0.2463  | 0.1856  | 0.314  |
| 8  | KwaZulu-Natal | Umzinyathi(DC24 )                | 2 | 0.1182  | 0.05791 | 0.2076 | 0.05054 | 0.01868  | 0.1086  | 0.4242 | 0.2115  | 0.11    | 0.3491 |
| 9  | KwaZulu-Natal | Amajuba(DC25 )                   | 2 | 0.07926 | 0.04422 | 0.1262 | 0.06104 | 0.03099  | 0.1039  | 0.6937 | 0.1281  | 0.07894 | 0.1891 |
| 10 | KwaZulu-Natal | Zululand(DC26 )                  | 2 | 0.11    | 0.06136 | 0.1748 | 0.05228 | 0.023    | 0.09729 | 0.4865 | 0.1448  | 0.08545 | 0.2194 |
| 11 | KwaZulu-Natal | Umkhanyakude(DC27 )              | 2 | 0.1828  | 0.08925 | 0.3076 | 0.07254 | 0.01724  | 0.1923  | 0.6246 | 0.3106  | 0.1822  | 0.4597 |
| 12 | KwaZulu-Natal | Uthungulu(DC28 )                 | 2 | 0.1508  | 0.08907 | 0.2284 | 0.04962 | 0.02121  | 0.09368 | 0.4297 | 0.2798  | 0.1918  | 0.3792 |
| 13 | KwaZulu-Natal | iLembe(DC29 )                    | 2 | 0.09978 | 0.05305 | 0.1626 | 0.04743 | 0.01932  | 0.09164 | 0.382  | 0.299   | 0.2061  | 0.403  |
| 14 | Western Cape  | Overberg(DC3 )                   | 2 | 0.1689  | 0.06326 | 0.34   | 0.1069  | 0.04838  | 0.1905  | 0.9697 | 0.2617  | 0.1625  | 0.3779 |
| 15 | Mpumalanga    | Gert Sibande(DC30 )              | 2 | 0.1272  | 0.08051 | 0.1858 | 0.0872  | 0.04003  | 0.1613  | 0.9131 | 0.1952  | 0.1337  | 0.2682 |
| 16 | Mpumalanga    | Nkangala(DC31 )                  | 2 | 0.1089  | 0.06387 | 0.168  | 0.08483 | 0.03725  | 0.1619  | 0.8879 | 0.1729  | 0.09377 | 0.2813 |
| 17 | Mpumalanga    | Ehlanzeni(DC32 )                 | 2 | 0.1109  | 0.06154 | 0.1756 | 0.05599 | 0.02578  | 0.1013  | 0.5748 | 0.1369  | 0.08076 | 0.2082 |
| 18 | Mpmpopo       | Mopani(DC33 )                    | 2 | 0.1431  | 0.07957 | 0.2256 | 0.0617  | 0.02606  | 0.1172  | 0.653  | 0.2044  | 0.1242  | 0.3026 |
| 19 | Mpmpopo       | Vhembe(DC34 )                    | 2 | 0.3445  | 0.2164  | 0.4879 | 0.04543 | 0.009324 | 0.1301  | 0.3269 | 0.3187  | 0.1959  | 0.4596 |
| 20 | Mpmpopo       | Capricorn(DC35 )                 | 2 | 0.1974  | 0.1192  | 0.2941 | 0.07428 | 0.03325  | 0.1356  | 0.8247 | 0.09946 | 0.05098 | 0.1659 |
| 21 | Mpmpopo       | Waterberg(DC36 )                 | 2 | 0.1778  | 0.1137  | 0.2566 | 0.06741 | 0.0335   | 0.1164  | 0.7848 | 0.1342  | 0.08162 | 0.2012 |
| 22 | North West    | Bojanala(DC37 )                  | 2 | 0.1266  | 0.0697  | 0.2024 | 0.07792 | 0.02931  | 0.1618  | 0.7908 | 0.1476  | 0.08438 | 0.23   |
| 23 | North West    | Ngaka Modiri Molema(DC38 )       | 2 | 0.1954  | 0.1226  | 0.2846 | 0.1056  | 0.05521  | 0.1743  | 0.9881 | 0.109   | 0.05876 | 0.1752 |
| 24 | North West    | Dr Ruth Segomotsi Mompati(DC39 ) | 2 | 0.1692  | 0.106   | 0.2468 | 0.132   | 0.07636  | 0.2046  | 0.9996 | 0.1239  | 0.07322 | 0.1886 |
| 25 | Western Cape  | Eden(DC4 )                       | 2 | 0.2097  | 0.1112  | 0.3394 | 0.2323  | 0.08294  | 0.4752  | 0.9983 | 0.1827  | 0.0791  | 0.3372 |
| 26 | North West    | Dr Kenneth Kaunda(DC40 )         | 2 | 0.2127  | 0.1307  | 0.3157 | 0.1207  | 0.05429  | 0.2259  | 0.985  | 0.1584  | 0.09257 | 0.2445 |
| 27 | Gauteng       | Sedibeng(DC42 )                  | 2 | 0.1454  | 0.08982 | 0.2158 | 0.101   | 0.05312  | 0.1667  | 0.9842 | 0.1549  | 0.09703 | 0.2269 |
| 28 | KwaZulu-Natal | Sisonke(DC43 )                   | 2 | 0.2124  | 0.1354  | 0.3036 | 0.09505 | 0.02861  | 0.2192  | 0.836  | 0.5023  | 0.3943  | 0.6106 |
| 29 | Eastern Cape  | Alfred Nzo(DC44 )                | 2 | 0.1742  | 0.09988 | 0.2692 | 0.07957 | 0.0269   | 0.1764  | 0.7721 | 0.2141  | 0.1286  | 0.318  |
| 30 | Northern Cape | John Taolo Gaetsewe(DC45 )       | 2 | 0.07937 | 0.03288 | 0.1509 | 0.1481  | 0.07062  | 0.2554  | 0.9974 | 0.11    | 0.05066 | 0.1953 |
| 31 | Mpmpopo       | Greater Sekhukhune(DC47 )        | 2 | 0.1711  | 0.1089  | 0.2471 | 0.0565  | 0.02749  | 0.09913 | 0.5941 | 0.1002  | 0.05735 | 0.156  |
| 32 | Gauteng       | West Rand(DC48 )                 | 2 | 0.1302  | 0.07144 | 0.209  | 0.07501 | 0.03295  | 0.1391  | 0.8238 | 0.2145  | 0.1305  | 0.318  |
| 33 | Western Cape  | Central Karoo(DC5 )              | 2 | 0.1202  | 0.06622 | 0.1919 | 0.1525  | 0.06198  | 0.2952  | 0.9924 | 0.1561  | 0.07059 | 0.2849 |
| 34 | Northern Cape | Namakwa(DC6 )                    | 2 | 0.1246  | 0.05504 | 0.2328 | 0.1907  | 0.08144  | 0.3554  | 0.9989 | 0.1582  | 0.07077 | 0.2903 |
| 35 | Northern Cape | Pixley ka Seme(DC7 )             | 2 | 0.1307  | 0.06888 | 0.2186 | 0.1639  | 0.07476  | 0.3043  | 0.9986 | 0.1658  | 0.08984 | 0.2696 |
| 36 | Northern Cape | Siyanda(DC8 )                    | 2 | 0.09598 | 0.04842 | 0.1621 | 0.2573  | 0.1599   | 0.3732  | 1      | 0.08701 | 0.04297 | 0.1491 |
| 37 | Northern Cape | Frances Baard(DC9 )              | 2 | 0.1295  | 0.07766 | 0.1958 | 0.07582 | 0.03871  | 0.1274  | 0.8855 | 0.1067  | 0.06185 | 0.1654 |
| 38 | Gauteng       | Ekurhuleni(EKU )                 | 2 | 0.1112  | 0.05864 | 0.1828 | 0.06712 | 0.02181  | 0.151   | 0.6442 | 0.2049  | 0.1248  | 0.3035 |
| 39 | KwaZulu-Natal | eThekwinini(ETH )                | 2 | 0.1541  | 0.09327 | 0.2296 | 0.04473 | 0.01898  | 0.08459 | 0.3271 | 0.3253  | 0.2353  | 0.4239 |
| 40 | Free State    | Mangaung(MAN )                   | 3 | 0.1796  | 0.09535 | 0.2888 | 0.0718  | 0.02092  | 0.1736  | 0.6634 | 0.1433  | 0.07081 | 0.2421 |
| 41 | Eastern Cape  | Nelson Mandela Bay(NMA )         | 3 | 0.165   | 0.08202 | 0.2734 | 0.04625 | 0.01246  | 0.1066  | 0.36   | 0.1786  | 0.0921  | 0.2888 |
| 42 | Gauteng       | City of Tshwane(TSH )            | 3 | 0.09553 | 0.05602 | 0.1474 | 0.05805 | 0.02975  | 0.09837 | 0.6406 | 0.1444  | 0.09192 | 0.2094 |
| 43 | Gauteng       | City of Johannesburg(JHB )       | 3 | 0.1386  | 0.08344 | 0.2082 | 0.09279 | 0.04909  | 0.1526  | 0.972  | 0.1436  | 0.088   | 0.2134 |
| 44 | Eastern Cape  | Buffalo City(BUF )               | 3 | 0.1372  | 0.01922 | 0.4191 | 0.1599  | 0.01787  | 0.5186  | 0.8231 | 0.3951  | 0.1597  | 0.6695 |
| 45 | Western Cape  | City of Cape Town(CPT )          | 3 | 0.08289 | 0.04357 | 0.1361 | 0.05161 | 0.0232   | 0.09386 | 0.4803 | 0.2383  | 0.1639  | 0.3231 |
| 46 | Western Cape  | West Coast(DC1 )                 | 3 | 0.05897 | 0.02383 | 0.1142 | 0.07063 | 0.02809  | 0.1372  | 0.7527 | 0.1846  | 0.1021  | 0.2899 |
| 47 | Eastern Cape  | Cacadu(DC10 )                    | 3 | 0.09913 | 0.05348 | 0.162  | 0.07902 | 0.03841  | 0.1384  | 0.8888 | 0.1247  | 0.0704  | 0.1959 |
| 48 | Eastern Cape  | Amathole(DC12 )                  | 3 | 0.1125  | 0.0483  | 0.21   | 0.1222  | 0.04755  | 0.2395  | 0.9682 | 0.177   | 0.08792 | 0.297  |

1

2

|    |               |                                  |   |         |         |         |         |          |         |        |         |         |        |
|----|---------------|----------------------------------|---|---------|---------|---------|---------|----------|---------|--------|---------|---------|--------|
| 3  | Eastern Cape  | Chris Hani(DC13 )                | 3 | 0.1191  | 0.06821 | 0.1853  | 0.08486 | 0.04285  | 0.1444  | 0.9347 | 0.2082  | 0.1348  | 0.2952 |
| 4  | Eastern Cape  | Joe Gqabi(DC14 )                 | 3 | 0.1757  | 0.1063  | 0.2627  | 0.04569 | 0.01966  | 0.08636 | 0.3454 | 0.2665  | 0.178   | 0.3695 |
| 5  | Eastern Cape  | O.R.Tambo(DC15 )                 | 3 | 0.1378  | 0.08116 | 0.2099  | 0.03496 | 0.0137   | 0.069   | 0.1386 | 0.3064  | 0.2167  | 0.4054 |
| 6  | Free State    | Xhariep(DC16 )                   | 3 | 0.1183  | 0.06517 | 0.1899  | 0.05539 | 0.02437  | 0.1038  | 0.5477 | 0.1298  | 0.07328 | 0.204  |
| 7  | Free State    | Lejweleputswa(DC18 )             | 3 | 0.1578  | 0.09485 | 0.2381  | 0.06957 | 0.03491  | 0.1203  | 0.8155 | 0.1247  | 0.07255 | 0.1934 |
| 8  | Free State    | Thabo Mofutsanyane(DC19 )        | 3 | 0.163   | 0.09673 | 0.2486  | 0.06561 | 0.03092  | 0.1188  | 0.7382 | 0.156   | 0.09155 | 0.2386 |
| 9  | Western Cape  | Cape Winelands(DC2 )             | 3 | 0.07268 | 0.03731 | 0.1233  | 0.06535 | 0.03095  | 0.1164  | 0.7413 | 0.1678  | 0.1021  | 0.2506 |
| 10 | Free State    | Fezile Dabi(DC20 )               | 3 | 0.1435  | 0.07546 | 0.2375  | 0.07561 | 0.02844  | 0.161   | 0.7675 | 0.1733  | 0.09298 | 0.2798 |
| 11 | KwaZulu-Natal | Ugu(DC21 )                       | 3 | 0.1749  | 0.117   | 0.2444  | 0.06093 | 0.03166  | 0.1021  | 0.7033 | 0.2622  | 0.1911  | 0.3414 |
| 12 | KwaZulu-Natal | UMgungundlovu(DC22 )             | 3 | 0.1384  | 0.08452 | 0.2071  | 0.06935 | 0.03519  | 0.1188  | 0.8178 | 0.2108  | 0.1402  | 0.295  |
| 13 | KwaZulu-Natal | Uthukela(DC23 )                  | 3 | 0.1392  | 0.09633 | 0.1903  | 0.03777 | 0.01977  | 0.06308 | 0.1357 | 0.2345  | 0.1779  | 0.2975 |
| 14 | KwaZulu-Natal | Umzinyathi(DC24 )                | 3 | 0.1432  | 0.07187 | 0.2471  | 0.04596 | 0.01806  | 0.09536 | 0.3416 | 0.2133  | 0.111   | 0.3508 |
| 15 | KwaZulu-Natal | Amajuba(DC25 )                   | 3 | 0.1271  | 0.0746  | 0.1953  | 0.04906 | 0.02308  | 0.08819 | 0.4175 | 0.1494  | 0.09112 | 0.2224 |
| 16 | KwaZulu-Natal | Zululand(DC26 )                  | 3 | 0.13    | 0.07621 | 0.1989  | 0.03693 | 0.01626  | 0.06926 | 0.1535 | 0.245   | 0.1649  | 0.3383 |
| 17 | KwaZulu-Natal | Umkhanyakude(DC27 )              | 3 | 0.1065  | 0.05418 | 0.1766  | 0.02944 | 0.009015 | 0.06572 | 0.0913 | 0.1993  | 0.1229  | 0.2916 |
| 18 | KwaZulu-Natal | Uthungulu(DC28 )                 | 3 | 0.1633  | 0.1007  | 0.2407  | 0.03355 | 0.01402  | 0.06467 | 0.1066 | 0.2377  | 0.1608  | 0.3265 |
| 19 | KwaZulu-Natal | iLembe(DC29 )                    | 3 | 0.1567  | 0.08731 | 0.247   | 0.04675 | 0.01943  | 0.09049 | 0.3659 | 0.2126  | 0.1297  | 0.3134 |
| 20 | Western Cape  | Overberg(DC3 )                   | 3 | 0.0704  | 0.0317  | 0.1275  | 0.05608 | 0.01646  | 0.1344  | 0.4869 | 0.3234  | 0.2199  | 0.4389 |
| 21 | Mpumalanga    | Gert Sibande(DC30 )              | 3 | 0.1385  | 0.08868 | 0.2001  | 0.1     | 0.058    | 0.1568  | 0.9935 | 0.2184  | 0.1525  | 0.2946 |
| 22 | Mpumalanga    | Nkangala(DC31 )                  | 3 | 0.08912 | 0.04967 | 0.1423  | 0.06322 | 0.03152  | 0.1102  | 0.723  | 0.1816  | 0.1142  | 0.2646 |
| 23 | Mpumalanga    | Ehlanzeni(DC32 )                 | 3 | 0.2547  | 0.179   | 0.3411  | 0.07772 | 0.04149  | 0.1277  | 0.9132 | 0.2431  | 0.1712  | 0.325  |
| 24 | Limpopo       | Mopani(DC33 )                    | 3 | 0.2269  | 0.1402  | 0.3321  | 0.07594 | 0.03503  | 0.1374  | 0.8468 | 0.2602  | 0.1678  | 0.3688 |
| 25 | Limpopo       | Vhembe(DC34 )                    | 3 | 0.08287 | 0.03497 | 0.1527  | 0.03008 | 0.008862 | 0.0689  | 0.1045 | 0.09792 | 0.04537 | 0.1711 |
| 26 | Limpopo       | Capricorn(DC35 )                 | 3 | 0.165   | 0.101   | 0.2445  | 0.04567 | 0.02002  | 0.08496 | 0.3423 | 0.1152  | 0.06539 | 0.1801 |
| 27 | Limpopo       | Waterberg(DC36 )                 | 3 | 0.1238  | 0.07581 | 0.1848  | 0.0486  | 0.02109  | 0.09374 | 0.3999 | 0.1087  | 0.06519 | 0.1645 |
| 28 | North West    | Bojanala(DC37 )                  | 3 | 0.09938 | 0.05396 | 0.1605  | 0.05226 | 0.02302  | 0.09714 | 0.4889 | 0.1211  | 0.06903 | 0.1891 |
| 29 | North West    | Ngaka Modiri Molema(DC38 )       | 3 | 0.1633  | 0.1012  | 0.2402  | 0.06389 | 0.03132  | 0.1109  | 0.7345 | 0.2329  | 0.1564  | 0.3223 |
| 30 | North West    | Dr Ruth Segomotsi Mompati(DC39 ) | 3 | 0.1945  | 0.1238  | 0.281   | 0.05648 | 0.02712  | 0.0996  | 0.5941 | 0.1384  | 0.08252 | 0.2097 |
| 31 | Western Cape  | Eden(DC4 )                       | 3 | 0.0843  | 0.03756 | 0.1559  | 0.1612  | 0.07344  | 0.2884  | 0.9981 | 0.132   | 0.06445 | 0.2259 |
| 32 | North West    | Dr Kenneth Kaunda(DC40 )         | 3 | 0.1625  | 0.09505 | 0.2509  | 0.0677  | 0.02986  | 0.1307  | 0.7358 | 0.1677  | 0.09896 | 0.2572 |
| 33 | Gauteng       | Sedibeng(DC42 )                  | 3 | 0.1142  | 0.06875 | 0.1729  | 0.06461 | 0.0341   | 0.1078  | 0.7708 | 0.1466  | 0.0927  | 0.2138 |
| 34 | KwaZulu-Natal | Sisonke(DC43 )                   | 3 | 0.155   | 0.0975  | 0.2252  | 0.09775 | 0.05317  | 0.1579  | 0.9841 | 0.296   | 0.2152  | 0.3851 |
| 35 | Eastern Cape  | Alfred Nzo(DC44 )                | 3 | 0.1841  | 0.1084  | 0.2793  | 0.06464 | 0.02845  | 0.1201  | 0.7047 | 0.2548  | 0.1629  | 0.3633 |
| 36 | Northern Cape | John Taolo Gaetsewe(DC45 )       | 3 | 0.09068 | 0.04187 | 0.1614  | 0.06867 | 0.02895  | 0.1298  | 0.7468 | 0.1379  | 0.07142 | 0.2282 |
| 37 | Limpopo       | Greater Sekhukhune(DC47 )        | 3 | 0.1279  | 0.08001 | 0.1869  | 0.04788 | 0.02424  | 0.08181 | 0.3928 | 0.1478  | 0.09599 | 0.2112 |
| 38 | Gauteng       | West Rand(DC48 )                 | 3 | 0.1617  | 0.09056 | 0.2555  | 0.0502  | 0.02172  | 0.09522 | 0.4424 | 0.1884  | 0.1098  | 0.2885 |
| 39 | Western Cape  | Central Karoo(DC5 )              | 3 | 0.09703 | 0.05147 | 0.1598  | 0.06807 | 0.03197  | 0.1213  | 0.7748 | 0.1204  | 0.06643 | 0.1921 |
| 40 | Northern Cape | Namakwa(DC6 )                    | 3 | 0.1057  | 0.05441 | 0.1782  | 0.1011  | 0.04923  | 0.1768  | 0.9714 | 0.1123  | 0.05835 | 0.1869 |
| 41 | Northern Cape | Pixley ka Seme(DC7 )             | 3 | 0.1166  | 0.06284 | 0.1935  | 0.1084  | 0.05628  | 0.1856  | 0.9895 | 0.1394  | 0.08035 | 0.2178 |
| 42 | Northern Cape | Siyanda(DC8 )                    | 3 | 0.126   | 0.0721  | 0.1967  | 0.1382  | 0.07841  | 0.2165  | 0.9996 | 0.0805  | 0.04126 | 0.135  |
| 43 | Northern Cape | Frances Baard(DC9 )              | 3 | 0.1029  | 0.05921 | 0.1605  | 0.0524  | 0.02539  | 0.09201 | 0.5014 | 0.1024  | 0.05881 | 0.1594 |
| 44 | Gauteng       | Ekurhuleni(EKU )                 | 3 | 0.07632 | 0.0379  | 0.1304  | 0.05052 | 0.02234  | 0.09407 | 0.4531 | 0.1519  | 0.08918 | 0.2311 |
| 45 | KwaZulu-Natal | eThekwinini(ETH )                | 3 | 0.1044  | 0.06208 | 0.1582  | 0.05228 | 0.02551  | 0.0907  | 0.5028 | 0.2659  | 0.194   | 0.3456 |
| 46 | Free State    | Mangaung(MAN )                   | 4 | 0.0977  | 0.04448 | 0.1762  | 0.05627 | 0.0198   | 0.118   | 0.5279 | 0.1446  | 0.073   | 0.2422 |
| 47 | Eastern Cape  | Nelson Mandela Bay(NMA )         | 4 | 0.1177  | 0.05435 | 0.2048  | 0.03282 | 0.003788 | 0.1215  | 0.183  | 0.2203  | 0.1292  | 0.3297 |
| 48 | Gauteng       | City of Tshwane(TSH )            | 4 | 0.04195 | 0.02183 | 0.07053 | 0.04327 | 0.02172  | 0.07455 | 0.2748 | 0.06547 | 0.03711 | 0.1032 |

1  
2

|    |               |                                  |   |         |         |         |         |          |         |        |         |         |         |
|----|---------------|----------------------------------|---|---------|---------|---------|---------|----------|---------|--------|---------|---------|---------|
| 3  | Gauteng       | City of Johannesburg(JHB )       | 4 | 0.05362 | 0.02747 | 0.09045 | 0.08226 | 0.04506  | 0.1328  | 0.9462 | 0.07729 | 0.04359 | 0.122   |
| 4  | Eastern Cape  | Buffalo City(BUF )               | 4 | 0.1071  | 0.02688 | 0.2502  | 0.06609 | 0.004739 | 0.284   | 0.4216 | 0.2966  | 0.1304  | 0.5039  |
| 6  | Western Cape  | City of Cape Town(CPT )          | 4 | 0.05357 | 0.01625 | 0.1266  | 0.05948 | 0.02668  | 0.108   | 0.6312 | 0.144   | 0.08642 | 0.2156  |
| 7  | Western Cape  | West Coast(DC1 )                 | 4 | 0.03934 | 0.01405 | 0.08209 | 0.04707 | 0.01736  | 0.09626 | 0.3722 | 0.0695  | 0.03037 | 0.1278  |
| 8  | Eastern Cape  | Cacadu(DC10 )                    | 4 | 0.08965 | 0.04781 | 0.1477  | 0.0372  | 0.01513  | 0.07357 | 0.1773 | 0.2337  | 0.1483  | 0.3357  |
| 9  | Eastern Cape  | Amathole(DC12 )                  | 4 | 0.09697 | 0.0427  | 0.1797  | 0.04584 | 0.01202  | 0.119   | 0.3369 | 0.2448  | 0.1342  | 0.3844  |
| 10 | Eastern Cape  | Chris Hani(DC13 )                | 4 | 0.0985  | 0.05515 | 0.1562  | 0.03396 | 0.01411  | 0.06593 | 0.1177 | 0.1778  | 0.1128  | 0.2565  |
| 12 | Eastern Cape  | Joe Gqabi(DC14 )                 | 4 | 0.1651  | 0.09877 | 0.2497  | 0.02564 | 0.009752 | 0.05238 | 0.0337 | 0.1461  | 0.08581 | 0.2231  |
| 13 | Eastern Cape  | O.R.Tambo(DC15 )                 | 4 | 0.09858 | 0.05902 | 0.1492  | 0.02015 | 0.00569  | 0.04963 | 0.0234 | 0.248   | 0.1795  | 0.3243  |
| 14 | Free State    | Xhariep(DC16 )                   | 4 | 0.132   | 0.0749  | 0.2078  | 0.04248 | 0.01675  | 0.08698 | 0.2766 | 0.09104 | 0.04874 | 0.1498  |
| 15 | Free State    | Lejweleputswa(DC18 )             | 4 | 0.122   | 0.07281 | 0.1858  | 0.05533 | 0.02769  | 0.09611 | 0.5723 | 0.0928  | 0.05353 | 0.1454  |
| 17 | Free State    | Thabo Mofutsanyane(DC19 )        | 4 | 0.08804 | 0.0483  | 0.1434  | 0.05133 | 0.02209  | 0.1006  | 0.4545 | 0.1221  | 0.07062 | 0.1902  |
| 18 | Western Cape  | Cape Winelands(DC2 )             | 4 | 0.05301 | 0.02622 | 0.09161 | 0.04811 | 0.01891  | 0.0987  | 0.3859 | 0.1004  | 0.05856 | 0.155   |
| 19 | Free State    | Fezile Dabi(DC20 )               | 4 | 0.07487 | 0.03629 | 0.1317  | 0.0557  | 0.02053  | 0.12    | 0.5098 | 0.1863  | 0.1055  | 0.2914  |
| 20 | KwaZulu-Natal | Ugu(DC21 )                       | 4 | 0.08087 | 0.04628 | 0.1257  | 0.02403 | 0.01021  | 0.04599 | 0.0137 | 0.1765  | 0.1201  | 0.2429  |
| 22 | KwaZulu-Natal | UMgungundlovu(DC22 )             | 4 | 0.07222 | 0.04072 | 0.1148  | 0.02711 | 0.01228  | 0.05051 | 0.0275 | 0.1508  | 0.09742 | 0.2161  |
| 23 | KwaZulu-Natal | Uthukela(DC23 )                  | 4 | 0.09537 | 0.06296 | 0.1349  | 0.04508 | 0.02461  | 0.07314 | 0.3102 | 0.149   | 0.1071  | 0.1977  |
| 24 | KwaZulu-Natal | Umzinyathi(DC24 )                | 4 | 0.08876 | 0.04291 | 0.1587  | 0.03362 | 0.0132   | 0.07021 | 0.1265 | 0.1551  | 0.07914 | 0.2634  |
| 25 | KwaZulu-Natal | Amajuba(DC25 )                   | 4 | 0.08474 | 0.04995 | 0.13    | 0.04012 | 0.01569  | 0.08313 | 0.2337 | 0.1143  | 0.07171 | 0.1671  |
| 26 | KwaZulu-Natal | Zululand(DC26 )                  | 4 | 0.08751 | 0.05018 | 0.137   | 0.02945 | 0.01255  | 0.05628 | 0.0531 | 0.1838  | 0.1226  | 0.257   |
| 28 | KwaZulu-Natal | Umkhanyakude(DC27 )              | 4 | 0.07549 | 0.03499 | 0.1334  | 0.03548 | 0.007931 | 0.09936 | 0.201  | 0.1457  | 0.08301 | 0.2255  |
| 29 | KwaZulu-Natal | Uthungulu(DC28 )                 | 4 | 0.1133  | 0.06716 | 0.1723  | 0.02959 | 0.01217  | 0.05756 | 0.0595 | 0.1915  | 0.1287  | 0.2654  |
| 30 | KwaZulu-Natal | iLembe(DC29 )                    | 4 | 0.07838 | 0.04204 | 0.1275  | 0.02559 | 0.01013  | 0.05105 | 0.0291 | 0.1555  | 0.09758 | 0.2266  |
| 32 | Western Cape  | Overberg(DC3 )                   | 4 | 0.05185 | 0.02124 | 0.09931 | 0.03229 | 0.01083  | 0.06888 | 0.121  | 0.2068  | 0.1281  | 0.3012  |
| 33 | Mpumalanga    | Gert Sibande(DC30 )              | 4 | 0.1043  | 0.06356 | 0.1574  | 0.05363 | 0.02795  | 0.09083 | 0.5413 | 0.1444  | 0.0936  | 0.2071  |
| 34 | Mpumalanga    | Nkangala(DC31 )                  | 4 | 0.05487 | 0.02938 | 0.09093 | 0.05037 | 0.02271  | 0.09553 | 0.4369 | 0.1337  | 0.08241 | 0.1993  |
| 35 | Mpumalanga    | Ehlanzeni(DC32 )                 | 4 | 0.07037 | 0.03825 | 0.1135  | 0.04061 | 0.01924  | 0.07247 | 0.2207 | 0.125   | 0.07788 | 0.1838  |
| 37 | Limpopo       | Mopani(DC33 )                    | 4 | 0.08139 | 0.04131 | 0.1371  | 0.0522  | 0.02285  | 0.09752 | 0.4876 | 0.09153 | 0.04813 | 0.1507  |
| 38 | Limpopo       | Vhembe(DC34 )                    | 4 | 0.136   | 0.07485 | 0.2154  | 0.0229  | 0.006895 | 0.05217 | 0.0307 | 0.06845 | 0.0308  | 0.1226  |
| 39 | Limpopo       | Capricorn(DC35 )                 | 4 | 0.1021  | 0.0564  | 0.1629  | 0.03331 | 0.01386  | 0.06439 | 0.1071 | 0.1062  | 0.05974 | 0.1679  |
| 40 | Limpopo       | Waterberg(DC36 )                 | 4 | 0.07594 | 0.0438  | 0.119   | 0.03911 | 0.01884  | 0.06888 | 0.1829 | 0.07391 | 0.04271 | 0.1157  |
| 42 | North West    | Bojanala(DC37 )                  | 4 | 0.07324 | 0.03805 | 0.1231  | 0.04879 | 0.01852  | 0.1018  | 0.3996 | 0.08255 | 0.0442  | 0.1354  |
| 43 | North West    | Ngaka Modiri Molema(DC38 )       | 4 | 0.08968 | 0.04975 | 0.1432  | 0.06858 | 0.03463  | 0.1169  | 0.8085 | 0.1027  | 0.0589  | 0.1597  |
| 44 | North West    | Dr Ruth Segomotsi Mompati(DC39 ) | 4 | 0.08981 | 0.0507  | 0.1417  | 0.06858 | 0.03573  | 0.1152  | 0.8171 | 0.05378 | 0.02783 | 0.09063 |
| 46 | Western Cape  | Eden(DC4 )                       | 4 | 0.06746 | 0.02562 | 0.1406  | 0.06725 | 0.02077  | 0.1613  | 0.6227 | 0.1326  | 0.0657  | 0.2266  |
| 47 | North West    | Dr Kenneth Kaunda(DC40 )         | 4 | 0.07375 | 0.0384  | 0.1247  | 0.05763 | 0.0269   | 0.1057  | 0.5973 | 0.08794 | 0.04717 | 0.1453  |
| 48 | Gauteng       | Sedibeng(DC42 )                  | 4 | 0.0667  | 0.03669 | 0.1086  | 0.04837 | 0.02411  | 0.08407 | 0.404  | 0.1202  | 0.07249 | 0.1817  |
| 49 | KwaZulu-Natal | Sisonke(DC43 )                   | 4 | 0.07345 | 0.03796 | 0.1223  | 0.02278 | 0.008378 | 0.04704 | 0.0171 | 0.09571 | 0.05265 | 0.152   |
| 51 | Eastern Cape  | Alfred Nzo(DC44 )                | 4 | 0.1462  | 0.08241 | 0.2285  | 0.02308 | 0.008373 | 0.04881 | 0.0215 | 0.133   | 0.07426 | 0.2097  |
| 52 | Northern Cape | John Taolo Gaetsewe(DC45 )       | 4 | 0.1016  | 0.05288 | 0.1678  | 0.08257 | 0.03947  | 0.1444  | 0.908  | 0.05625 | 0.02532 | 0.1022  |
| 53 | Limpopo       | Greater Sekhukhune(DC47 )        | 4 | 0.1042  | 0.06319 | 0.1569  | 0.0478  | 0.02407  | 0.08215 | 0.3925 | 0.06652 | 0.03735 | 0.1057  |
| 54 | Gauteng       | West Rand(DC48 )                 | 4 | 0.05351 | 0.02476 | 0.09764 | 0.04323 | 0.01775  | 0.08442 | 0.2941 | 0.102   | 0.05209 | 0.1728  |
| 56 | Western Cape  | Central Karoo(DC5 )              | 4 | 0.07641 | 0.03834 | 0.1311  | 0.04408 | 0.01875  | 0.08464 | 0.3085 | 0.09028 | 0.04692 | 0.15    |
| 57 | Northern Cape | Namakwa(DC6 )                    | 4 | 0.06789 | 0.03284 | 0.1195  | 0.06312 | 0.02825  | 0.1166  | 0.6835 | 0.07444 | 0.03661 | 0.1288  |
| 58 | Northern Cape | Pixley ka Seme(DC7 )             | 4 | 0.09222 | 0.0517  | 0.148   | 0.05126 | 0.02437  | 0.09368 | 0.461  | 0.1182  | 0.06756 | 0.1862  |
| 59 | Northern Cape | Siyanda(DC8 )                    | 4 | 0.09641 | 0.05257 | 0.1551  | 0.07439 | 0.03692  | 0.1278  | 0.8633 | 0.04772 | 0.02213 | 0.08534 |



1

2

|    |               |                                  |   |         |         |         |         |          |         |        |         |         |        |
|----|---------------|----------------------------------|---|---------|---------|---------|---------|----------|---------|--------|---------|---------|--------|
| 3  | Northern Cape | Frances Baard(DC9 )              | 4 | 0.1118  | 0.06732 | 0.1696  | 0.0418  | 0.01993  | 0.07405 | 0.2446 | 0.06456 | 0.03501 | 0.1053 |
| 4  | Gauteng       | Ekurhuleni(EKU )                 | 4 | 0.03506 | 0.01562 | 0.06488 | 0.06292 | 0.03084  | 0.1093  | 0.7175 | 0.0923  | 0.05138 | 0.1467 |
| 5  | KwaZulu-Natal | eThekwinini(ETH )                | 4 | 0.1238  | 0.07914 | 0.179   | 0.01876 | 0.007401 | 0.03737 | 0.0025 | 0.2876  | 0.2172  | 0.3641 |
| 6  | Free State    | Mangaung(MAN )                   | 5 | 0.1069  | 0.04453 | 0.2024  | 0.0437  | 0.01171  | 0.1124  | 0.3047 | 0.1709  | 0.07981 | 0.2987 |
| 7  | Eastern Cape  | Nelson Mandela Bay(NMA )         | 5 | 0.09343 | 0.03104 | 0.1916  | 0.02627 | 0.003955 | 0.07768 | 0.1082 | 0.1705  | 0.07581 | 0.2982 |
| 8  | Gauteng       | City of Tshwane(TSH )            | 5 | 0.05958 | 0.03037 | 0.1013  | 0.03678 | 0.0165   | 0.0685  | 0.1517 | 0.08472 | 0.0465  | 0.1366 |
| 9  | Gauteng       | City of Johannesburg(JHB )       | 5 | 0.0661  | 0.03092 | 0.1179  | 0.05088 | 0.02127  | 0.09775 | 0.4556 | 0.09294 | 0.04727 | 0.1566 |
| 10 | Eastern Cape  | Buffalo City(BUF )               | 5 | 0.09476 | 0.01111 | 0.3266  | 0.05182 | 0.003448 | 0.2323  | 0.3254 | 0.1994  | 0.05385 | 0.4304 |
| 11 | Western Cape  | City of Cape Town(CPT )          | 5 | 0.0901  | 0.03945 | 0.165   | 0.07019 | 0.02612  | 0.1409  | 0.7271 | 0.1801  | 0.09786 | 0.2857 |
| 12 | Western Cape  | West Coast(DC1 )                 | 5 | 0.07424 | 0.02694 | 0.1538  | 0.04857 | 0.01469  | 0.1112  | 0.3902 | 0.1091  | 0.04406 | 0.2102 |
| 13 | Eastern Cape  | Cacadu(DC10 )                    | 5 | 0.07736 | 0.03719 | 0.1368  | 0.03561 | 0.0123   | 0.07905 | 0.1703 | 0.1172  | 0.06046 | 0.1957 |
| 14 | Eastern Cape  | Amathole(DC12 )                  | 5 | 0.07544 | 0.02655 | 0.1615  | 0.03551 | 0.008888 | 0.09441 | 0.1953 | 0.1796  | 0.07963 | 0.3242 |
| 15 | Eastern Cape  | Chris Hani(DC13 )                | 5 | 0.06621 | 0.03073 | 0.1193  | 0.02794 | 0.01004  | 0.05946 | 0.0625 | 0.1679  | 0.09502 | 0.2621 |
| 16 | Eastern Cape  | Joe Gqabi(DC14 )                 | 5 | 0.07787 | 0.03574 | 0.1415  | 0.02486 | 0.0085   | 0.05426 | 0.038  | 0.1632  | 0.08761 | 0.2637 |
| 17 | Eastern Cape  | O.R.Tambo(DC15 )                 | 5 | 0.08704 | 0.04483 | 0.1456  | 0.01868 | 0.005663 | 0.04195 | 0.0088 | 0.1802  | 0.1114  | 0.2642 |
| 18 | Free State    | Xhariep(DC16 )                   | 5 | 0.09556 | 0.0479  | 0.1641  | 0.03589 | 0.01292  | 0.07778 | 0.1673 | 0.1124  | 0.05746 | 0.1901 |
| 19 | Free State    | Lejweleputswa(DC18 )             | 5 | 0.1138  | 0.06199 | 0.1856  | 0.04089 | 0.01768  | 0.07859 | 0.2391 | 0.1099  | 0.05962 | 0.1789 |
| 20 | Free State    | Thabo Mofutsanyane(DC19 )        | 5 | 0.09437 | 0.04871 | 0.1608  | 0.03939 | 0.01565  | 0.082   | 0.2159 | 0.1264  | 0.06736 | 0.2088 |
| 21 | Western Cape  | Cape Winelands(DC2 )             | 5 | 0.0925  | 0.04628 | 0.1591  | 0.0541  | 0.02154  | 0.1071  | 0.5056 | 0.1108  | 0.05848 | 0.1826 |
| 22 | Free State    | Fezile Dabi(DC20 )               | 5 | 0.09295 | 0.04332 | 0.1689  | 0.04421 | 0.01546  | 0.09892 | 0.3122 | 0.1629  | 0.08234 | 0.2761 |
| 23 | KwaZulu-Natal | Ugu(DC21 )                       | 5 | 0.06515 | 0.03118 | 0.1141  | 0.0291  | 0.01078  | 0.06025 | 0.0689 | 0.2041  | 0.1294  | 0.2942 |
| 24 | KwaZulu-Natal | UMgungundlovu(DC22 )             | 5 | 0.06007 | 0.02975 | 0.1049  | 0.03159 | 0.01277  | 0.06323 | 0.0896 | 0.1687  | 0.1008  | 0.255  |
| 25 | KwaZulu-Natal | Uthukela(DC23 )                  | 5 | 0.07366 | 0.0369  | 0.1261  | 0.03635 | 0.01498  | 0.07121 | 0.1587 | 0.1181  | 0.06564 | 0.1869 |
| 26 | KwaZulu-Natal | Umzinyathi(DC24 )                | 5 | 0.06816 | 0.03548 | 0.1145  | 0.03264 | 0.01343  | 0.06394 | 0.1007 | 0.1344  | 0.07878 | 0.2062 |
| 27 | KwaZulu-Natal | Amajuba(DC25 )                   | 5 | 0.08702 | 0.04654 | 0.1428  | 0.03216 | 0.01317  | 0.06332 | 0.0924 | 0.115   | 0.06492 | 0.1807 |
| 28 | KwaZulu-Natal | Zululand(DC26 )                  | 5 | 0.08179 | 0.04205 | 0.1385  | 0.02757 | 0.01073  | 0.05563 | 0.0468 | 0.1585  | 0.09278 | 0.2425 |
| 29 | KwaZulu-Natal | Umkhanyakude(DC27 )              | 5 | 0.08356 | 0.0337  | 0.16    | 0.04427 | 0.01307  | 0.1007  | 0.3307 | 0.1108  | 0.04926 | 0.1988 |
| 30 | KwaZulu-Natal | Uthungulu(DC28 )                 | 5 | 0.1054  | 0.05513 | 0.1743  | 0.03221 | 0.01203  | 0.0662  | 0.1086 | 0.1777  | 0.1062  | 0.2671 |
| 31 | KwaZulu-Natal | iLembe(DC29 )                    | 5 | 0.06697 | 0.03073 | 0.1211  | 0.03029 | 0.009424 | 0.07162 | 0.1084 | 0.163   | 0.09109 | 0.2561 |
| 32 | Western Cape  | Overberg(DC3 )                   | 5 | 0.09568 | 0.04146 | 0.1769  | 0.04942 | 0.01204  | 0.1302  | 0.3803 | 0.2146  | 0.1186  | 0.3356 |
| 33 | mpumalanga    | Gert Sibande(DC30 )              | 5 | 0.08942 | 0.04921 | 0.1451  | 0.03912 | 0.01816  | 0.07228 | 0.1947 | 0.129   | 0.07546 | 0.1993 |
| 34 | mpumalanga    | Nkangala(DC31 )                  | 5 | 0.07231 | 0.03739 | 0.1233  | 0.04704 | 0.02126  | 0.08835 | 0.3698 | 0.1076  | 0.05845 | 0.1752 |
| 35 | mpumalanga    | Ehlanzeni(DC32 )                 | 5 | 0.07384 | 0.03625 | 0.1281  | 0.03836 | 0.01564  | 0.07516 | 0.2001 | 0.07158 | 0.03446 | 0.1248 |
| 36 | mpopopo       | Mopani(DC33 )                    | 5 | 0.1004  | 0.04689 | 0.1784  | 0.05964 | 0.02286  | 0.1209  | 0.5918 | 0.08324 | 0.03695 | 0.1522 |
| 37 | mpopopo       | Vhembe(DC34 )                    | 5 | 0.1096  | 0.04638 | 0.202   | 0.04795 | 0.01387  | 0.1095  | 0.3858 | 0.08445 | 0.03257 | 0.1648 |
| 38 | mpopopo       | Capricorn(DC35 )                 | 5 | 0.1135  | 0.05661 | 0.1935  | 0.04223 | 0.01582  | 0.08683 | 0.279  | 0.1163  | 0.05806 | 0.1971 |
| 39 | mpopopo       | Waterberg(DC36 )                 | 5 | 0.06451 | 0.03326 | 0.1091  | 0.03943 | 0.01745  | 0.07391 | 0.2079 | 0.1024  | 0.05697 | 0.1639 |
| 40 | North West    | Bojanala(DC37 )                  | 5 | 0.0774  | 0.03672 | 0.1391  | 0.04117 | 0.01433  | 0.09099 | 0.2626 | 0.1169  | 0.05926 | 0.1986 |
| 41 | North West    | Ngaka Modiri Molema(DC38 )       | 5 | 0.07094 | 0.03304 | 0.1271  | 0.04752 | 0.01927  | 0.09351 | 0.3857 | 0.1055  | 0.05326 | 0.1784 |
| 42 | North West    | Dr Ruth Segomotsi Mompati(DC39 ) | 5 | 0.07974 | 0.03953 | 0.1378  | 0.05313 | 0.02293  | 0.1008  | 0.4994 | 0.07539 | 0.03659 | 0.132  |
| 43 | Western Cape  | Eden(DC4 )                       | 5 | 0.07396 | 0.03057 | 0.1424  | 0.06293 | 0.01782  | 0.1599  | 0.5534 | 0.1085  | 0.04862 | 0.1979 |
| 44 | North West    | Dr Kenneth Kaunda(DC40 )         | 5 | 0.09486 | 0.04913 | 0.1616  | 0.04531 | 0.0195   | 0.08782 | 0.3321 | 0.1054  | 0.05508 | 0.1771 |
| 45 | Gauteng       | Sedibeng(DC42 )                  | 5 | 0.06668 | 0.03408 | 0.1142  | 0.04831 | 0.02213  | 0.08981 | 0.4012 | 0.1106  | 0.06083 | 0.1787 |
| 46 | KwaZulu-Natal | Sisonke(DC43 )                   | 5 | 0.06397 | 0.02633 | 0.1234  | 0.02421 | 0.007352 | 0.05607 | 0.0432 | 0.2003  | 0.1123  | 0.3113 |
| 47 | Eastern Cape  | Alfred Nzo(DC44 )                | 5 | 0.06469 | 0.02775 | 0.1226  | 0.02584 | 0.00854  | 0.0577  | 0.0509 | 0.1635  | 0.0862  | 0.2667 |
| 48 | Northern Cape | John Taolo Gaetsewe(DC45 )       | 5 | 0.08431 | 0.03505 | 0.1603  | 0.0562  | 0.01981  | 0.1194  | 0.5218 | 0.08058 | 0.03258 | 0.1563 |

1  
2  
3  
4  
5  
6  
7  
8  
9  
10  
11  
12  
13  
14

15  
16  
17  
18  
19  
20  
21  
22  
23  
24  
25  
26  
27  
28  
29  
30  
31  
32  
33  
34  
35  
36  
37  
38  
39  
40  
41  
42  
43  
44  
45  
46  
47  
48  
49  
50  
51  
52  
53  
54  
55  
56  
57  
58  
59  
60

|    |               |                           |   |         |         |         |         |          |         |        |         |         |        |
|----|---------------|---------------------------|---|---------|---------|---------|---------|----------|---------|--------|---------|---------|--------|
| 3  | Limpopo       | Greater Sekhukhune(DC47 ) | 5 | 0.07424 | 0.03669 | 0.1286  | 0.04955 | 0.02151  | 0.09391 | 0.4254 | 0.06453 | 0.03101 | 0.1137 |
| 4  | Gauteng       | West Rand(DC48 )          | 5 | 0.0625  | 0.02798 | 0.117   | 0.03643 | 0.01352  | 0.07603 | 0.1751 | 0.1122  | 0.05466 | 0.1958 |
| 5  | Western Cape  | Central Karoo(DC5 )       | 5 | 0.0802  | 0.03706 | 0.1455  | 0.05129 | 0.0196   | 0.1052  | 0.448  | 0.09237 | 0.04354 | 0.164  |
| 6  | Northern Cape | Namakwa(DC6 )             | 5 | 0.09181 | 0.03883 | 0.1782  | 0.05104 | 0.01953  | 0.1054  | 0.4406 | 0.0862  | 0.03898 | 0.1578 |
| 7  | Northern Cape | Pixley ka Seme(DC7 )      | 5 | 0.08998 | 0.04711 | 0.1524  | 0.04131 | 0.01733  | 0.08273 | 0.2484 | 0.1102  | 0.0568  | 0.1881 |
| 8  | Northern Cape | Siyanda(DC8 )             | 5 | 0.1188  | 0.06163 | 0.1973  | 0.04994 | 0.02016  | 0.09848 | 0.4293 | 0.06679 | 0.02976 | 0.1224 |
| 9  | Northern Cape | Frances Baard(DC9 )       | 5 | 0.1008  | 0.05443 | 0.1649  | 0.03683 | 0.01559  | 0.07081 | 0.1581 | 0.07535 | 0.03818 | 0.1285 |
| 10 | Gauteng       | Ekurhuleni(EKU )          | 5 | 0.05108 | 0.02232 | 0.09517 | 0.05776 | 0.02487  | 0.109   | 0.5892 | 0.1092  | 0.05715 | 0.1803 |
| 11 | KwaZulu-Natal | eThekwinini(ETH )         | 5 | 0.06257 | 0.02875 | 0.1122  | 0.02369 | 0.007809 | 0.0518  | 0.0304 | 0.1526  | 0.08896 | 0.2329 |

**Supplementary 8: post hoc power analysis**

We performed a post hoc power analysis to assess the minimum effect size detectable among infants which has the smallest number of observations. The post hoc power analysis suggests that the sample size in the smallest age group has the power to detect a small effect size ( $w \sim 0.1$  based on Cohens rules of thumb [Cohen, 1988]) when using a chi-square test with 2x9 cells (maximum number of cells tested in our analyses i.e. binary nutritional classification versus province of residence) with 80% power and 5% alpha or type I error.

**$\chi^2$  tests - Goodness-of-fit tests: Contingency tables**

**Analysis:** Post hoc: Compute achieved power  
**Input:** Effect size  $w$  = 0.11  
 $\alpha$  err prob = 0.05  
 Total sample size = 1277  
 Df = 8  
**Output:** Noncentrality parameter  $\lambda$  = 15.4517000  
 Critical  $\chi^2$  = 15.5073131  
 Power (1- $\beta$  err prob) = 0.8133607

Cohen, J (1988) Statistical power analysis for the behavioral sciences (2nd ed.). Hillsdale, NJ: Erlbaum.

A summary guideline for effect size determinations is also provided in Kotrlik, JW and Williams, HA (2003) The incorporation of effect size in information technology, learning, and performance research. *Information Techology, Learning, and Performance Journal* **21(1)** 1-7.

| Effect Size                              | Use                           | Small | Medium | Large |
|------------------------------------------|-------------------------------|-------|--------|-------|
| Correlation inc Phi                      |                               | 0.1   | 0.3    | 0.5   |
| <a href="#">Cramer's V</a>               | r x c frequency tables        | 0.1   | 0.3    | 0.5   |
| <a href="#">Difference in arcsines</a>   | Comparing two proportions     | 0.2   | 0.5    | 0.8   |
| $\eta^2$                                 | Anova                         | 0.01  | 0.06   | 0.14  |
| <a href="#">omega-squared</a>            | Anova; See Field (2013)       | 0.01  | 0.06   | 0.14  |
| <a href="#">Multivariate eta-squared</a> | one-way MANOVA                | 0.01  | 0.06   | 0.14  |
| Cohen's f                                | one-way an(c)ova (regression) | 0.1   | 0.25   | 0.4   |
| $\eta^2$                                 | Multiple regression           | 0.02  | 0.13   | 0.26  |
| $\kappa^2$                               | Mediation analysis            | 0.01  | 0.09   | 0.25  |
| Cohen's f                                | Multiple Regression           | 0.14  | 0.39   | 0.59  |
| Cohen's d                                | t-tests                       | 0.2   | 0.5    | 0.8   |
| Cohen's $w$                              | chi-square                    | 0.1   | 0.3    | 0.5   |
| Odds Ratios                              | 2 by 2 tables                 | 1.5   | 3.5    | 9     |
| Odds Ratios                              | <a href="#">p vs 0.5</a>      | 0.55  | 0.65   | 0.75  |
| <a href="#">Average Spearman rho</a>     | Friedman test                 | 0.1   | 0.3    | 0.5   |

# BMJ Open

## Spatial-temporal trends and risk factors for under-nutrition and obesity among children (<5 years) in South Africa, 2008-2017: findings from a nationally representative longitudinal panel survey

|                                 |                                                                                                                                                                                                                                                                                                                                                                                                                                                                                                                                                                                                                                                                                                                                                                                            |
|---------------------------------|--------------------------------------------------------------------------------------------------------------------------------------------------------------------------------------------------------------------------------------------------------------------------------------------------------------------------------------------------------------------------------------------------------------------------------------------------------------------------------------------------------------------------------------------------------------------------------------------------------------------------------------------------------------------------------------------------------------------------------------------------------------------------------------------|
| Journal:                        | <i>BMJ Open</i>                                                                                                                                                                                                                                                                                                                                                                                                                                                                                                                                                                                                                                                                                                                                                                            |
| Manuscript ID                   | bmjopen-2019-034476.R2                                                                                                                                                                                                                                                                                                                                                                                                                                                                                                                                                                                                                                                                                                                                                                     |
| Article Type:                   | Original research                                                                                                                                                                                                                                                                                                                                                                                                                                                                                                                                                                                                                                                                                                                                                                          |
| Date Submitted by the Author:   | 13-Mar-2020                                                                                                                                                                                                                                                                                                                                                                                                                                                                                                                                                                                                                                                                                                                                                                                |
| Complete List of Authors:       | Sartorius, Benn; London School of Hygiene and Tropical Medicine Faculty of Infectious and Tropical Diseases, Disease Control<br>Sartorius, Kurt; University of KwaZulu-Natal, Public Health Medicine, School of Nursing and Public Health<br>Green, Rosemary; London School of Hygiene and Tropical Medicine, 2 Department of Population Health<br>Lutge, Elizabeth; South African Government Department, KwaZulu Natal Department of Health<br>Scheelbeek, Pauline; London School of Hygiene & Tropical Medicine, Epidemiology and Population Health<br>Tanser, Frank; Africa Centre for Health and Population Studies; University of KwaZulu-Natal<br>Dangour, Alan; London School of Hygiene & Tropical Medicine, Dept of Population Health<br>Slotow, Rob; University of KwaZulu-Natal |
| <b>Primary Subject Heading</b>: | Nutrition and metabolism                                                                                                                                                                                                                                                                                                                                                                                                                                                                                                                                                                                                                                                                                                                                                                   |
| Secondary Subject Heading:      | Epidemiology, Public health                                                                                                                                                                                                                                                                                                                                                                                                                                                                                                                                                                                                                                                                                                                                                                |
| Keywords:                       | PUBLIC HEALTH, Community child health < PAEDIATRICS, NUTRITION & DIETETICS                                                                                                                                                                                                                                                                                                                                                                                                                                                                                                                                                                                                                                                                                                                 |
|                                 |                                                                                                                                                                                                                                                                                                                                                                                                                                                                                                                                                                                                                                                                                                                                                                                            |

SCHOLARONE™  
Manuscripts





I, the Submitting Author has the right to grant and does grant on behalf of all authors of the Work (as defined in the below author licence), an exclusive licence and/or a non-exclusive licence for contributions from authors who are: i) UK Crown employees; ii) where BMJ has agreed a CC-BY licence shall apply, and/or iii) in accordance with the terms applicable for US Federal Government officers or employees acting as part of their official duties; on a worldwide, perpetual, irrevocable, royalty-free basis to BMJ Publishing Group Ltd ("BMJ") its licensees and where the relevant Journal is co-owned by BMJ to the co-owners of the Journal, to publish the Work in this journal and any other BMJ products and to exploit all rights, as set out in our [licence](#).

The Submitting Author accepts and understands that any supply made under these terms is made by BMJ to the Submitting Author unless you are acting as an employee on behalf of your employer or a postgraduate student of an affiliated institution which is paying any applicable article publishing charge ("APC") for Open Access articles. Where the Submitting Author wishes to make the Work available on an Open Access basis (and intends to pay the relevant APC), the terms of reuse of such Open Access shall be governed by a Creative Commons licence – details of these licences and which [Creative Commons](#) licence will apply to this Work are set out in our licence referred to above.

Other than as permitted in any relevant BMJ Author's Self Archiving Policies, I confirm this Work has not been accepted for publication elsewhere, is not being considered for publication elsewhere and does not duplicate material already published. I confirm all authors consent to publication of this Work and authorise the granting of this licence.

1  
2  
3 1 **Title page**  
4  
5

6 2 **Spatial-temporal trends and risk factors for under-nutrition and obesity among children**  
7  
8 3 **(<5 years) in South Africa, 2008-2017: findings from a nationally representative**  
9  
10 4 **longitudinal panel survey**  
11  
12

13  
14 5 **Running title: under-nutrition and obesity among children in South Africa**  
15

16 6 Sartorius B<sup>1-3\*</sup>, Sartorius K<sup>2,4</sup>, Green R<sup>5</sup>, Lutge E<sup>2,6</sup>, Scheelbeek P<sup>5</sup>, Tanser F<sup>2,7-9</sup>, Dangour AD<sup>5</sup>, Slotow R<sup>10,11</sup>  
17  
18

- 19 7 1. Department of Disease Control, London School of Hygiene & Tropical Medicine, London, UK  
20  
21 8 2. Department of Public Health Medicine, School of Nursing and Public Health, University of KwaZulu-  
22  
23 9 Natal, Durban, South Africa  
24  
25 10 3. Department of Health Metrics Sciences, School of Medicine, University of Washington, Seattle, USA  
26  
27 11 4. Faculty of Commerce, Law and Management, University of the Witwatersrand, Johannesburg, South  
28  
29 12 Africa  
30  
31 13 5. Department of Population Health, London School of Hygiene & Tropical Medicine, London, UK  
32  
33 14 6. Health Research and Knowledge Management, KwaZulu-Natal Department of Health, KwaZulu-Natal,  
34  
35 15 South Africa  
36  
37 16 7. Africa Health Research Institute (AHRI), KwaZulu-Natal, South Africa  
38  
39 17 8. Centre for the AIDS Programme of Research in South Africa (CAPRISA), University of KwaZulu-Natal,  
40  
41 18 Durban, South Africa  
42  
43 19 9. Institute of Epidemiology and Health Care, University College London, London, United Kingdom  
44  
45 20 10. School of Life Sciences, University of Kwazulu-Natal, Pietermaritzburg Campus, South Africa  
46  
47 21 11. Department of Genetics, Evolution and Environment, University College, London, UK

48 22 \*Corresponding author: Dr Benn Sartorius; Address: Department of Disease Control, London School of Hygiene  
49  
50 23 and Tropical Medicine, Keppel Street, Bloomsbury, London, WC1E7HT, United Kingdom; Tel.: +44 (0)207 927  
51  
52 24 2164; E-mail: benn.sartorius1@lshtm.ac.uk  
53  
54

55 25 **Word count: 4095**  
56  
57  
58 26  
59  
60

## 27 **Summary**

28 Objectives: To assess space-time trends in malnutrition and associated risk factors among children (<5 years) in  
29 South Africa

30 Design: multi-round national panel survey using multistage random sampling

31 Setting: national, community-based

32 Participants: Community-based sample of children and adults. Sample size: 3,254 children in wave 1 (2008) to  
33 4,710 children in wave 5 (2017).

34 Primary outcomes: Stunting, wasting/thinness and obesity among children (<5). Classification were based on  
35 anthropometric (height and weight) z-scores using WHO growth standards.

36 Results: Between 2008 and 2017 a larger decline nationally in stunting among children (<5) was observed from  
37 11.0% to 7.6% (p=0.007), compared to thinness/wasting (5.2% to 3.8%, p=0.131) and obesity (14.5% to 12.9%,  
38 p=0.312). A geographic nutritional gradient was observed with obesity more pronounced in the east of the country  
39 and thinness/wasting more pronounced in the west. Approximately 73% of districts had an estimated wasting  
40 prevalence below the 2025 target threshold of 5% in 2017 while 83% and 88% of districts achieved the necessary  
41 relative reduction in stunting and no increase in obesity respectively from 2012 to 2017 in line with 2025 targets.  
42 African ethnicity, male gender, low birth weight, lower socio-economic and maternal/paternal education status  
43 and rural residence were significantly associated with stunting. Children in lower income and food insecure  
44 households with young malnourished mothers were significantly more likely to be thin/wasted while African  
45 children, with higher birth weights, living in lower income households in KwaZulu-Natal and Eastern Cape were  
46 significantly more likely to be obese.

47 Conclusions: While improvements in stunting have been observed, thinness/wasting and obesity prevalence  
48 remain largely unchanged. The geographic and socio-demographic heterogeneity in childhood malnutrition has  
49 implications for equitable attainment of global nutritional targets for 2025, with many districts having dual  
50 epidemics of under- and over-nutrition. Effective sub-national level public health planning and tailored  
51 interventions are required to address this challenge.

52 **Keywords:** nutritional status, nutritional transition, undernutrition, obesity, children, South Africa

## 53 **Strengths and limitations of this study**

- Utilises data from a nationally representative repeated panel data at individual/household level over a 10-year period (5 survey waves).
- Employed a fully Bayesian space-time shared component model to produce more stable estimates of malnutrition burden at provincial and district level among children under five years of age in South Africa.
- Panel design allows assessment of change in malnutrition burden within the same individuals/households observed at multiple time points.
- Missing or invalid weight/height measurements may have introduced selection bias if not missing at random, and may thus have affected both the internal validity and the representativeness the findings.
- As primary panel study was not designed/powerd for provincial and lower geographic level analysis, we cannot discount the resultant impact on precision/random variability when analysing at provincial/district level (administrative tier just below province) and further stratification by socio-demographic correlates.

## Background

Despite reductions in malnutrition 150.8 million children (22.2%) under five are stunted and a further 50.5 million children are wasted<sup>1</sup>. Furthermore rapidly rising trend in overweight and obesity in children and adults<sup>2-4 5</sup> has emerged as one of the most serious global public health issues of the 21<sup>st</sup> century<sup>6</sup>. Sub-Saharan Africa (SSA) has among the highest levels of child malnutrition<sup>1</sup> globally. This problem is particularly illustrated by South Africa<sup>7</sup>, a middle income country with high levels of wealth/economic inequality that is undergoing rapid socioeconomic and lifestyle changes that have precipitated a nutritional transition, high prevalence of overweight/obesity in children<sup>8</sup>. The dual burdens of undernutrition and overweight/obesity are not distributed in a spatially homogenous manner<sup>9</sup>, and the health risks associated with malnutrition vary by age, gender, ethnicity and geographical location<sup>10</sup>.

Progress to tackle all forms of child malnutrition remain much too slow<sup>1</sup>. In order to support the delivery of public health interventions that will be most effective at reducing malnutrition, an understanding of the geographical distribution of malnutrition is required. Limited data are collected at lower administrative unit level making it difficult to identify specific groups of high-risk individuals and thus, determine the most suitable and

---

<sup>1</sup> Child malnutrition is defined as a pathological state as a result of inadequate nutrition, including undernutrition due to insufficient intake of dietary energy and other key nutrients resulting in stunting (low height for age) or wasting (low weight-for-length) and overweight and obesity due to excessive consumption of dietary energy and reduced levels of physical activity.

1  
2  
3 80 cost-effective opportunities and solutions. Previous studies of nutritional status of the South African population  
4  
5 81 have mostly focused on adults<sup>11 12</sup>. Here we use a large, nationally-representative data from multiple rounds of  
6  
7 82 the National Income Dynamics Study over the period 2008 to 2017 to assess space-time trends in the burden of  
8  
9 83 malnutrition and associated risk factors among children under 5 years of age in South Africa.

## 11 84 **Methods**

12  
13  
14 85 We include a Strengthening the Reporting of Observational studies in Epidemiology (STROBE) statement<sup>13</sup>  
15  
16 86 checklist in Supplementary Material 1.

## 17 87 **Data**

18  
19 88 Data were taken from the five panel (cross-sectional) waves of the South African National Income Dynamics  
20  
21 89 Study (SA-NIDS)<sup>14 15</sup> (<http://www.nids.uct.ac.za/nids-data/data-access>;  
22  
23 90 <https://www.datafirst.uct.ac.za/dataportal/index.php/catalog/NIDS/>), the first national panel study in South Africa.  
24  
25 91 SA-NIDS was undertaken by the South African Labour and Development Research Unit based at the School of  
26  
27 92 Economics at the University of Cape Town. The surveys took place in 2008, 2010-11, 2012, 2014-15 and 2017.  
28  
29 93 These are named waves 1-5 respectively. A detailed description of the data collection methods can be found  
30  
31 94 elsewhere<sup>14</sup>. In short, a stratified, two-stage random cluster sample design was employed to sample households  
32  
33 95 for inclusion at baseline using proportionally allocated stratification, based on the 52 district councils (DCs) in  
34  
35 96 South Africa<sup>14</sup>. Within each DC (primary sampling unit [PSU]), clusters of dwelling units were systematically  
36  
37 97 drawn. The household level response rate was 69% and the individual response rate within households was 93%.  
38  
39 98 Survey enumerators attempted to collect weight and height measurements of all individuals (including children) in  
40  
41 99 selected households.  
42  
43  
44

## 45 100 **Study population**

46  
47  
48 101 We restricted our analysis to children <5 years of age.

## 49 102 **Outcomes**

50  
51  
52  
53 103 We calculated height for age (HA) and BMI-for-age (BA) z-scores using the WHO 2007 growth standards<sup>16 17</sup>.  
54  
55 104 We generated z-scores by transformation of child anthropometric data using the “lambda mu sigma” method  
56  
57 105 (‘zanthro’ function in Stata 15). As recommended, weight-for-length was used in children 0 to <2 years of age,  
58  
59 106 and BMI-for-age in children 2 years of age and older<sup>18</sup>. We defined obesity as weight-for-length z-score  $\geq +2$  for  
60

1  
2  
3 107 children under 2 years of age and BMI for age z-score of  $>2+$  for children age 2 and older<sup>18</sup>. We defined wasting  
4  
5 108 as weight-for-length z-score  $< -2$  for children under 2 years of age and thinness as BMI for age z-score  $< -2$  for  
6  
7 109 children 2 years and older. Stunting was defined as HA z-score of  $< -2$ .  
8

### 9 110 10 11 111 **Geographic and socio-demographic variables**

12  
13 112 To identify relevant inequalities under-nutrition and obesity indicators were stratified temporally (survey year),  
14  
15 113 geographically (province and residence location type: urban informal settlements, urban formal, tribal/rural) and  
16  
17 114 by important socio-demographic categories (Gender: Female/Male; ethnicity: Black/African, Coloured,  
18  
19 115 Indian/Asian, White/Caucasian; Maternal: age; education status; body mass index; household socio-economic  
20  
21 116 status (income) classified into quantiles [1=lowest, 5=highest].  
22

### 23 117 **Data analysis**

24  
25  
26 118 Analyses were performed using Stata software version 15 [StataCorp. 2017. Stata Statistical Software: Release 15.  
27  
28 119 College Station, TX: StataCorp LLC]. Given the multistage random sampling design of the primary study,  
29  
30 120 clustering and survey design effects were accounted for using sample weights to estimate standard error and 95%  
31  
32 121 confidence intervals (CIs) around mean anthropometric z-score point estimates, both overall and stratified by  
33  
34 122 other socio-demographic variables such ethnicity and gender, socio-economic status, and residence location type.  
35  
36 123 Extrapolated population totals of malnourished children ( $< 5$ ) by yearly age were estimated using the survey  
37  
38 124 weights.  
39

40 125 *Space-time Bayesian modelling:* We assessed for the presence of univariate and bivariate spatial autocorrelation  
41  
42 126 for the three anthropometric classifications using Moran's I statistics. This analysis was performed using GeoDa  
43  
44 127<sup>19</sup>. Based on these tests it appeared that there was no prominent bivariate spatial autocorrelation between the three  
45  
46 128 measures but that each measure was significantly heterogeneous across space, warranting the use of a separate  
47  
48 129 spatial-temporal model for each nutritional outcome. These additional analyses are presented in Supplementary  
49  
50 130 Material 2.

51  
52 131 We employed Bayesian spatial-temporal modelling approach in an attempt to stabilise estimates at district level  
53  
54 132 given that the primary sampling design was not developed to provide point estimates at this level of geographic  
55  
56 133 disaggregation and resultant zero prevalence estimates for particular districts and waves. We choose a Bayesian  
57  
58 134 spatial-temporal formulation to model each of the anthropometric outcomes independently using an autoregressive  
59  
60 135 approach. We employed a Bayesian hierarchical binomial model that simultaneously attempts to estimate the

stable spatial and temporal structured patterns and as well as from these stable components using an unstructured space-time interaction term <sup>20</sup>.

Let  $Y_{1ij}$ ,  $Y_{2ij}$  and  $Y_{3ij}$  be the number of stunted, thin and obese children respectively for the  $i$ th area and  $j$ th period,  $i=1,\dots,I$ ,  $j=1,\dots,J$ , and  $n_{ij}$  the total number of children sampled in a given area and period. We assumed that  $Y_{1ij}$ ,  $Y_{2ij}$  and  $Y_{3ij}$  follow binomial distributions i.e.  $Y_{1ij} \sim \text{binomial}(n_{1ij}, \pi_{1ij})$ ,  $Y_{2ij} \sim \text{binomial}(n_{2ij}, \pi_{2ij})$ ,  $Y_{3ij} \sim \text{binomial}(n_{3ij}, \pi_{3ij})$ ,  $i=1,\dots,53$ ,  $j=1,\dots,5$ , where  $\pi$  it is the risk (prevalence) of stunting, thinness or obesity in region  $i$  in period  $j$ . We define the logit of the prevalence for a given anthropometric outcome as follows:

$$\text{logit}(\pi_{1ij}) = \alpha_1 + \phi_{1i} + \gamma_{1j} + v_{1ij}$$

$$\text{logit}(\pi_{2ij}) = \alpha_2 + \phi_{2i} + \gamma_{2j} + v_{2ij}$$

$$\text{logit}(\pi_{3ij}) = \alpha_3 + \phi_{3i} + \gamma_{3j} + v_{3ij}$$

$$v \sim \text{Normal}(0, \sigma^2_v), i = 1, \dots, I \text{ and } j=1,\dots,J$$

$$\phi \sim \text{CAR.normal}(\sigma^2_\phi), \text{ for } i=1,\dots,I$$

$$\gamma = (\gamma_1, \gamma_2, \dots, \gamma_J) \sim \text{CAR.normal}(\sigma^2_\gamma) \alpha \sim \text{Uniform}(-\infty, +\infty)$$

where  $\alpha_{1-3}$  are the overall baseline risk (intercept) for each nutritional outcome,  $\phi_{1-3}$ , the spatial random effects, assume intrinsic Gaussian conditionally autoregressive distributions <sup>21</sup> (abbreviated above as CAR.normal), whereby the spatially correlated random effect of the  $i$ th region ( $\phi_i$ ) is based on the sum of its weighted neighbourhood values. We used an adjacency matrix of common boundaries (neighbours) of a given region when modelling this parameter. The CAR approach can also be used to model the temporal random effects. A first-order (pre and post) random walk CAR.normal, utilising a period adjacency matrix, was used as prior distributions for the temporal random effects,  $\gamma_{1-3}$ . The heterogeneous or unstructured random effects are represented by  $v_{1-3}$  and were included to ensure sufficient flexibility for estimates in close regions that is not captured by the spatially structured terms. We assumed uniform priors for the model intercepts to ensure model identifiability. As the CAR.normal distribution is parameterised to include a sum-to-zero constraint on the random effects, we thus included a separate intercept term,  $\alpha$ , in each model, which were assigned improper uniform priors (on the whole real line) using the dflat() distribution function in WinBUGS. We chose inverse gamma distributions for the variance parameters above with values of 0.5 and 0.0005 as suggested by Wakefield et al <sup>22</sup>:

$$\sigma^2_v, \sigma^2_\phi, \sigma^2_\gamma \sim \text{Gamma}(0.5, 0.0005)$$



1  
2  
3 163 To aid interpretation of prevalence point estimates in line with WHO 2025 nutritional targets we also estimated  
4  
5 164 exceedance probabilities associated with the target thresholds for each nutritional outcome, namely: 40%  
6  
7 165 reduction in stunting from 2012 to 2015, reduce and maintain wasting to <5% by 2025 and no increase in obesity  
8  
9 166 by 2025<sup>23</sup>. We employed Richardson's criterion, in which probabilities in excess of 0.8 were deemed to be  
10  
11 167 significant<sup>24</sup>.

12  
13 168 Survey weighted prevalence's were applied to sample size totals by district and panel to obtain a survey weighted  
14  
15 169 numerator counts for each outcome ( $Y_{1ij}$ ,  $Y_{2ij}$ ,  $Y_{3ij}$  above) from the binomial distribution. The space-time models  
16  
17 170 were fitted in WINBUGS using Markov chain Monte Carlo (MCMC) simulation and non-informative priors. The  
18  
19 171 full WINBUGS model code is provided in the Supplementary Material (3). A summary of the space-time random  
20  
21 172 effect posteriors is presented in Supplementary 4. Sensitivity of the estimates to prior specification was assessed  
22  
23 173 by repeating the analysis with different hyper parameters (Supplementary 4). We used two-chain MCMC  
24  
25 174 simulation for parameter estimation, a burn-in of 10000 iterations, and Gelman-Rubin statistics/plots<sup>25</sup> were used  
26  
27 175 to assess model convergence/stability and where the Monte Carlo error for each parameter of interest was less  
28  
29 176 than 5% of the sample standard deviation (Supplementary Material 5). For model validation, we firstly compared  
30  
31 177 the observed and fitted prevalence values to assess overall model adequacy and fit (using model Deviance  
32  
33 178 Information Criterion [DIC] and comparison of observed vs fitted prevalence estimate) and secondly, performed  
34  
35 179 an out of sample validation using a random 10% sample with observed data (Supplementary Material 6). The  
36  
37 180 model was run until the Monte Carlo error for each parameter of interest was < 5% of the sample standard  
38  
39 181 deviation. Posterior prevalence estimates and 95% Bayesian credibility intervals for stunting, thinness/wasting and  
40  
41 182 obesity at provincial and district level were mapped using ArcGIS 10.6.1 [ESRI 2011. ArcGIS Desktop: Release  
42  
43 183 10. Redlands, CA: Environmental Systems Research Institute].

44  
45 184 *Risk factors analysis:* Survey weighed two-way tabulations of key socio-demographic covariates, year and child  
46  
47 185 nutritional status were performed to produce correctly weighted prevalence estimates. Tests of independence for  
48  
49 186 complex survey data survey (weighted Pearson's chi-square test) was utilised to assess the significance of bivariate  
50  
51 187 associations between malnutrition burden and year as well as socio-demographic covariates.

52  
53 188 **Ethical approval:** Approval for the primary study was granted by the Ethics Committee of the University of Cape  
54  
55 189 Town. The current study is a secondary data analysis of an open access dataset and does not require further ethical  
56  
57 190 approval.



1  
2  
3 **191 Patient and Public Involvement:** As this was a data analysis utilising secondary data from a national community  
4  
5 **192** based panel survey, the development of the research question was not informed by the study subjects. Likewise,  
6  
7 **193** we could not involve study participants in the design of this study. Study participants were not involved in  
8  
9 **194** conduct of the primary study. Results will be disseminated in the form of peer reviewed article as well as through  
10  
11 **195** presentation to senior members of our National Department of Health and KwaZulu-Natal Department of Health.  
12

## 13 **196 Results**

### 16 **197 Study population**

18 **198** The sample of children <5 years of age in the 7,301 households included in the SA-NIDS survey increased from  
19 **199** 3,254 children at baseline (2008) to 4,710 children in wave 5 (2017) (Supplementary Material 7). With the  
20 **199** 3,254 children at baseline (2008) to 4,710 children in wave 5 (2017) (Supplementary Material 7). With the  
21 **199** 3,254 children at baseline (2008) to 4,710 children in wave 5 (2017) (Supplementary Material 7). With the  
22 **200** exception of children under 1 year of age and survey wave 2 in 2010/11, valid weight and height measurements  
23 **200** exception of children under 1 year of age and survey wave 2 in 2010/11, valid weight and height measurements  
24 **201** were taken from 85-90% of children sampled between the age of 1 and 5 on average (Supplementary Material 7).  
25 **201** were taken from 85-90% of children sampled between the age of 1 and 5 on average (Supplementary Material 7).  
26 **202** An additional sensitivity analysis comparing distributions of various socio-demographic characteristics by  
27 **202** An additional sensitivity analysis comparing distributions of various socio-demographic characteristics by  
28 **203** missing weight/height status was also performed (Supplementary Section 8). These findings suggest that  
29 **203** missing weight/height status was also performed (Supplementary Section 8). These findings suggest that  
30 **204** children with missing weight/height were largely missing at random, with the exception of age and province. A  
31 **204** children with missing weight/height were largely missing at random, with the exception of age and province. A  
32 **205** summary of the characteristics of the study sample by year can be found in Table 1.  
33 **205** summary of the characteristics of the study sample by year can be found in Table 1.  
34 **206**  
35 **206**

### 36 **207 Temporal changes in burden of malnutrition from 2008 to 2017)**

38 **208** Between 2008 and 2017, the prevalence of stunting among children aged under 5 years decreased from 11.0% to  
39 **208** Between 2008 and 2017, the prevalence of stunting among children aged under 5 years decreased from 11.0% to  
40 **209** 7.6% (p=0.007) (Table 2). Over the same period, both the prevalence of wasting/thinness (and the prevalence of  
41 **209** 7.6% (p=0.007) (Table 2). Over the same period, both the prevalence of wasting/thinness (and the prevalence of  
42 **210** obesity decreased (from 5.2 to 3.8%, p= 0.131 and 14.5% to 12.9%, p= 0.312 respectively). The prevalence of  
43 **210** obesity decreased (from 5.2 to 3.8%, p= 0.131 and 14.5% to 12.9%, p= 0.312 respectively). The prevalence of  
44 **211** thinness was higher (p<0.001) in children under 2 years of age (8% [95%CI: 5.0-11.8%] in 2008; 6% [95%CI:  
45 **211** thinness was higher (p<0.001) in children under 2 years of age (8% [95%CI: 5.0-11.8%] in 2008; 6% [95%CI:  
46 **212** 4.1-9.1%] in 2017) compared to 4% (95%CI: 3.2-6.2%) in 2008 and 3% (95%CI: 2.0-4.5%) in 2017 among  
47 **212** 4.1-9.1%] in 2017) compared to 4% (95%CI: 3.2-6.2%) in 2008 and 3% (95%CI: 2.0-4.5%) in 2017 among  
48 **213** children 2 years and older . The prevalence of obesity was also higher among children under 2 years of age and  
49 **213** children 2 years and older . The prevalence of obesity was also higher among children under 2 years of age and  
50 **214** increased over the study period (18.4% [95%CI: 13.7-24.1%] in 2008 vs 21.7% [95%CI: 19.3-24.2%]in 2017,  
51 **214** increased over the study period (18.4% [95%CI: 13.7-24.1%] in 2008 vs 21.7% [95%CI: 19.3-24.2%]in 2017,  
52 **215** p=0.091).  
53 **215** p=0.091).  
54 **216**  
55 **216**

### 56 **217 Space-time burden of malnutrition at provincial and district level**

57 **218** *Under nutrition:* In 2008, the highest prevalence of stunting was estimated in the Free State (18% .1 followed by  
58 **218** *Under nutrition:* In 2008, the highest prevalence of stunting was estimated in the Free State (18% .1 followed by  
59 **219** Eastern Cape (14.8%) and Limpopo (14.0%) . By 2017 the highest prevalence of stunting was still observed in  
60 **219** Eastern Cape (14.8%) and Limpopo (14.0%) . By 2017 the highest prevalence of stunting was still observed in

1  
2  
3 220 Free State (10%) followed by Northern Cape (9.6%) and Limpopo (8.5%) (Figure 1 – panel a1). One district in  
4  
5 221 Free State (Lejweleputswa), 2 in Limpopo (Capricorn; Mopani) and one each in Northern Cape (Siyanda), North  
6  
7 222 West (Dr Kenneth Kaunda), Eastern Cape (O.R.Tambo) and KwaZulu-Natal (Uthungulu) had a posterior median  
8  
9 223 smoothed prevalence of stunting in excess of 10% in 2017 (Figure 1– panel a2, Supplementary 9). Forty-three (or  
10  
11 224 83%) of districts achieved a 17% reduction (necessary reduction over the period to achieve 40% reduction from  
12  
13 225 2012 to 2025) in stunting prevalence from 2012 to 2017. Of these 43 districts, 19 (or 44%) significantly achieved  
14  
15 226 this threshold based on exceedance probability ( $p>0.80$ ).

16 227 North West province had the highest burden of thinness/wasting in 2008 (10.1%) followed by Gauteng (9.5%) and  
17  
18 228 Western Cape (8.2%) (Figure 2a). By 2017, the highest burden was observed in Western Cape (at 5.8%) followed  
19  
20 229 by Northern West (5.0%) and North Cape (4.9%) (Figure 2b) i.e.2 of 9 provinces were still above the 5% target  
21  
22 230 threshold for wasting in 2017. There appeared to be a general gradient of higher burden of thinness/wasting in the  
23  
24 231 western half of country in 2017 (lower burden in KwaZulu-Natal and northern districts of Eastern Cape) (Figure  
25  
26 232 2b). Our estimates suggest that 38/52 (or 73%) districts in 2017 were below the 5% target prevalence threshold  
27  
28 233 compared to 21/52 (or 40%) in 2012. Based on exceedance probability associated with the 5% target threshold,  
29  
30 234 approximately half (or 18/38) of the aforementioned districts with an estimated thinness/wasting prevalence below  
31  
32 235 5% in 2017 were below this threshold with high probability (exceedance  $p>0.8$ ) (Supplementary 9). Three of the  
33  
34 236 five districts with the highest posterior median smoothed prevalence of wasting in 2017 were located in Western  
35  
36 237 Cape (City of Cape Town [6.8%]; Central Karoo [6.4%]; Eden [6.1%]) with the remaining two in the top five  
37  
38 238 located in Eastern Cape (Buffalo City [7.9%]) and Gauteng (Sedibeng [6.6%]) (Supplementary 9).

39 239 *Obesity:* In 2008, the highest posterior median smoothed prevalence of obesity was estimated in Eastern Cape  
40  
41 240 (22.5%) followed by KwaZulu-Natal (18.3%) and Western Cape (18.1%) (Figure 3a). A decade later in 2017, the  
42  
43 241 highest prevalence of childhood obesity was still estimated to be in the Eastern Cape (16.7%), followed by  
44  
45 242 KwaZulu-Natal (15.6%) and Western Cape (15.0%). Six districts had an increase in obesity from 2012 to 2017,  
46  
47 243 namely: 3 in Limpopo (Capricorn, Vhembe, Waterberg), 1 in Free State (Mangaung), 1 in Eastern Cape  
48  
49 244 (Amathole) and 1 in North West (Bojanala) (Supplementary 9). In contrast to the wasting gradient highlighted  
50  
51 245 above (higher burden in the western half of the country), the burden of obesity in 2017 appeared to be much higher  
52  
53 246 in the eastern half of the country (particularly KwaZulu-Natal and Eastern Cape) (Figure 3b), with the exception of  
54  
55 247 certain districts in Western Cape. Eight of the top 10 highest obesity prevalence districts in 2017 were located in  
56  
57 248 KwaZulu-Natal (Sisonke [21.4%], Ugu [20.8%], Uthungulu [18.6%] and iLembe [18.0%]) and Eastern Cape  
58  
59 249 (Buffalo City Metropolitan [22.8%], Amathole [19.6%], Chris Hani [18.5%][O.R Tambo [17.9%]). The other two  
60

1  
2  
3 250 districts in the 10 highest obesity prevalence districts in 2017 were located in Western Cape (Overberg [22.0%]  
4  
5 251 and City of Cape Town [18.5%]) (Supplementary 9).

6  
7 252 **Figure 1:** Bayesian posterior median smoothed prevalence of stunting by province (and wave) and district level  
8  
9 253 prevalence (equal intervals, 2017) among children <5 years

10  
11 254 **Figure 2:** Bayesian posterior median smoothed prevalence of thinness/wasting by province (and wave) and  
12  
13 255 district level prevalence (equal intervals, 2017) among children <5 years

14  
15 256 **Figure 3:** Bayesian posterior median smoothed prevalence of obesity by province (and wave) and district level  
16  
17 257 prevalence (equal intervals, 2017) among children <5 years

18  
19 258

### 20 259 **Factors associated with child nutritional status**

21  
22 260 A bivariate analysis of demographic, maternal, socio-economic and household factors at individual nutritional  
23  
24 261 status level suggests that African ethnicity ( $p<0.001$ ), male gender ( $p=0.002$ ), low birth weight ( $<0.001$ ), residing  
25  
26 262 in lower socio-economic status household ( $p<0.001$ ), province of residence ( $p=0.012$ ), lower maternal/paternal  
27  
28 263 education status ( $p<0.001$ , 0.020 respectively) and residence in a rural/tribal authority area ( $p<0.001$ ) were  
29  
30 264 significantly associated with stunting (Table 3). Children living in lower income households ( $p=0.053$ ), lower  
31  
32 265 food security (as measured through child hunger in last year) ( $p<0.001$ ), province of residence ( $p=0.002$ ), having a  
33  
34 266 younger mother ( $<20$ ) ( $p=0.012$ ) and mother having a lower BMI classification ( $p=0.005$ ) was significantly  
35  
36 267 associated with thinness/wasting status. Children of African ethnicity ( $p<0.001$ ), higher birth weight ( $p=0.006$ ),  
37  
38 268 living in lower income households ( $p=0.001$ ) in KwaZulu-Natal and Eastern Cape ( $p<0.001$ ) as well as paternal  
39  
40 269 educational attainment ( $p=0.033$ ) were significantly associated with obesity status (Table 3).

### 41 42 270 **Discussion**

43  
44  
45 271 **Main findings:** The present study illustrates that while stunting has declined among South African children over  
46  
47 272 the last 10 years, wasting and obesity appear largely unchanged, suggesting that development and public health  
48  
49 273 interventions have had a variable impact. Stunting prevalence appears relatively evenly spread across South  
50  
51 274 Africa, but obesity burden is more pronounced in the east of the country, whereas thinness/wasting is more  
52  
53 275 pronounced in the west. In terms of progress towards WHO 2025 nutritional targets, 14 of 52 (27%) districts had  
54  
55 276 an estimated wasting prevalence still exceeding 5% prevalence in 2017 as well as 17% (9/52) and 12% (6/52)  
56  
57 277 districts not attaining the relative reduction in stunting prevalence required or with an increase in obesity  
58  
59 278 prevalence respectively from 2012 to 2017. A further concerning pattern observed was the increasing prevalence  
60

1  
2  
3 279 of obesity in children under the age of two years. Key socio-demographic factors associated with malnutrition  
4  
5 280 status were identified which likely underpins the spatial patterns (and heterogeneity) observed across the country.  
6  
7 281 African children with lower birth weights residing in lower income households in rural areas with less educated  
8  
9 282 mothers and fathers were particular more likely to be stunted. Children in lower income, food insecure households  
10  
11 283 with malnourished young mothers appeared particularly more likely to be thin/wasted while African children, with  
12  
13 284 higher birth weights, living in lower income households in KwaZulu-Natal and Eastern Cape were also more  
14  
15 285 likely to be obese. Furthermore, low household income appeared to be positively associated with all 3 nutritional  
16  
17 286 types. Declining childhood stunting rates from 2008-2017 may well have resulted from government initiatives to  
18  
19 287 support food security and child health (among other things), but our findings of distinct geographic and socio-  
20  
21 288 demographic variability in undernutrition and obesity rates suggest that tackling malnutrition in South Africa is  
22  
23 289 complex. Models and targets for nationally-driven intervention need to be carefully specified according to local  
24  
25 290 environments and socio-economic profiles.

26  
27 291 **Contribution to existing literature:** Two previous studies in South Africa among primary school aged children  
28  
29 292 dating back 25+ years (1993 and 1994 respectively) utilised cross sectional data<sup>26,27</sup>, thus limiting insight into  
30  
31 293 temporal trends. Furthermore, the study by Jinabhai et al.<sup>19</sup> was restricted to KwaZulu-Natal limiting national  
32  
33 294 representativeness. Another cross sectional study in South African in 2001-2003 among primary school children  
34  
35 295 in five South African Provinces suggested that relative to 1993 prevalence of undernutrition had decreased while  
36  
37 296 obesity had increased<sup>27,28</sup>. Thus these previous data are now outdated, were largely focused on primary school  
38  
39 297 aged children as well as cross sectional in nature and geographically restricted.

40  
41 298 This is also the first spatial-temporal Bayesian shared component analysis of malnutrition trends among children  
42  
43 299 in South Africa utilising geographically representative repeated panel data over a 10-year period. The current  
44  
45 300 study focusing on children under 5 year of age suggests that there is prominent geographic heterogeneity in  
46  
47 301 malnutrition burden in South Africa in this youngest age group. This is in line with findings from other settings in  
48  
49 302 Africa that have documented similar spatial heterogeneity<sup>29</sup> and persistence of these malnutrition inequalities has  
50  
51 303 been demonstrated in an 80 country study further highlighting this ongoing public health conundrum<sup>30,31</sup>. Our  
52  
53 304 results demonstrate a strong west to east gradient of higher underweight burden on the western side of South  
54  
55 305 Africa and greater obesity on the eastern seaboard (Eastern Cape and KwaZulu-Natal). A map of poverty and  
56  
57  
58  
59  
60

1  
2  
3 306 inequality in South Africa <sup>2</sup> illustrates the co-existence of high levels of poverty and inequality in many parts of  
4  
5 307 KwaZulu-Natal and the Eastern Cape with high levels of overweight/obesity. This is further confirmed by our  
6  
7 308 individual child level analysis which suggested a significantly higher obesity prevalence in lower income  
8  
9 309 households. Metropolitan areas displayed high levels of nutritional inequality that complement national studies of  
10  
11 310 poverty and inequality <sup>32</sup>.

12  
13 311 Under and over nutrition status appeared positively associated with lower household income classification. This  
14  
15 312 finding of stunting and wasting disproportionately affecting the poor has been often demonstrated <sup>33</sup>. Other studies  
16  
17 313 in Africa in particular have documented similar patterns i.e. children living in low SES households, children who  
18  
19 314 live in peripheral areas and whose mothers had little or no schooling were at significantly higher risk of  
20  
21 315 malnutrition <sup>34</sup>. The inconsistent challenges facing health authorities are occurring in the face of rapid urbanization  
22  
23 316 and industrialization that simultaneously attract both the rich and the poor to live in the same geographic districts  
24  
25 317 <sup>35</sup>.The heterogeneous geographic relationship between household income and undernutrition is also affected by the  
26  
27 318 allocation of household income that is a function of maternal education, access to markets, infrastructure and  
28  
29 319 sanitation <sup>36</sup>. Additionally, these data suggest that there is a strong and highly significant association between  
30  
31 320 higher food insecurity (child hunger frequency in the preceding year) and increased thinness/wasting. Community  
32  
33 321 and government based packages of support need to be highly targeted to the poorest and most food insecure  
34  
35 322 households to further reduce inequality in this regard and maximise reductions in malnutrition.

36  
37 323 Our findings suggest that children with low birth weight (due to pre-term delivery, fetal/intrauterine growth  
38  
39 324 restriction or a combination of the two) were significantly more likely to be stunted than normal weight babies and  
40  
41 325 this has been demonstrated in many other low and middle income settings (for example <sup>37</sup>). Socioeconomic  
42  
43 326 status/factors are known risk factors for LBW <sup>38</sup>and may in part explain the significant association found between  
44  
45 327 stunting and lower household income. South Africa has the higher number of incident and prevalent HIV  
46  
47 328 infections globally <sup>39</sup>. A further important contextual risk factor for LBW is maternal HIV status. A systematic  
48  
49 329 review and large observational studies focussing on low and middle incoming countries, suggest a strong and  
50  
51 330 significant association between maternal HIV infection and LBW <sup>40 41</sup>. Evidence from South Africa also suggests  
52  
53 331 the anthropometric z-score of HIV-infected children appear to be consistently lower when compared to HIV-  
54  
55 332 exposed but uninfected children <sup>42</sup>. We also observed a significantly higher prevalence of stunting among male

56  
57  
58  
59 <sup>2</sup> <https://southafrica-info.com/people/mapping-poverty-in-south-africa/>

1  
2  
3 333 children which has been demonstrated previously in a meta-analysis for sub-Saharan Africa <sup>43</sup>, the suggested  
4  
5 334 cause of which might be that male children are more vulnerable to health inequalities relative to female children of  
6  
7 335 the same age. Strengthening community-based packages of care and community health worker (CHW)  
8  
9 336 performance/skills in rural and high burden geographies are key strategies to improve primary health care delivery  
10  
11 337 through better identification of women at higher risk of poor birth outcomes (e.g. HIV positive, history of previous  
12  
13 338 poor birth outcomes and/or currently malnourished), higher referral rates for facility births, and improved linkage  
14  
15 339 to other health as well as social services <sup>44</sup>. Lastly given the high adolescent fertility rates in many parts of South  
16  
17 340 Africa <sup>45</sup>, there is also much scope to improve CHW identification of households with higher risk malnourished  
18  
19 341 adolescent girls prior to pregnancy to ensure more optimal linkage to government and social support to ensure  
20  
21 342 adequate nutrition as well as improved awareness regarding family planning practices e.g. ensuring adequate birth  
22  
23 343 spacing <sup>46</sup>.

24  
25 344 Obesity in children has a complex aetiology that includes a wide range of socioeconomic, demographic,  
26  
27 345 environmental and cultural variables <sup>47</sup> such as household composition, mother's education, household income,  
28  
29 346 household size, environmental factors, rural versus urban location, and sanitation <sup>9 48</sup>. The high burden of obesity  
30  
31 347 is likely associated with a progressive increases in the per capita food supply and consumption of high calorific  
32  
33 348 foods (e.g. fat, sugar, fast and/or processed foods) in South Africa<sup>49</sup>. This rapidly changing dietary pattern has, in  
34  
35 349 part, been attributed to urbanisation, growing and expanding supermarkets /formal food retailers, and the  
36  
37 350 availability of fast/processed foods <sup>50</sup>. An interesting finding in these data was the significant positive association  
38  
39 351 between child obesity status and residing in a lower income household. This association has been demonstrated  
40  
41 352 previously <sup>51-53</sup> and this evidence base is growing. This conforms with the idea that lower and higher income  
42  
43 353 households/families often have a higher obesity risk than middle income households i.e. so called U-shaped  
44  
45 354 association. Lower income or economically deprived families often replace health fresh food options with cheaper  
46  
47 355 and more calorific processed foods <sup>52</sup>. Multiple studies have demonstrated that the majority of low-income South  
48  
49 356 Africans have a low dietary diversity, and, therefore, consume a limited food range consisting predominantly of a  
50  
51 357 starchy staple such as bread and maize, with low intakes of vegetables and fruit <sup>49</sup>. Future work will characterise  
52  
53 358 food purchasing patterns (and changes over time) among households in South Africa which will be compared with  
54  
55 359 paired longitudinal anthropometric measurements to identify specific dietary patterns associated with child  
56  
57 360 nutritional status.



1  
2  
3 361 Lastly and contextually, body mass is culturally influenced in South Africa, and the high level of obesity in  
4  
5 362 KwaZulu-Natal and Eastern Cape may at least in part be a result of cultural beliefs that associate overweight with  
6  
7 363 wealth and good health<sup>54</sup>. Geographic patterns of higher obesity in South Africa appeared to overlap areas of high  
8  
9 364 poverty particular on the eastern side of the country<sup>3</sup> and thus not solely concentrated among higher socio-  
10  
11 365 economic households.

12  
13 366 **Strengths:** To our knowledge this is the first spatial-temporal analysis of malnutrition trends among children  
14  
15 367 under five years of age in South Africa. We used standardised anthropometric measurements of children and their  
16  
17 368 mothers from a nationally representative repeated panel data over a 10-year period. The panel nature of the design  
18  
19 369 allows assessment of change in malnutrition burden within the same individuals/households observed at multiple  
20  
21 370 time points. A further strength was the implementation of a fully Bayesian space-time shared component model to  
22  
23 371 produce more stable joint estimates of malnutrition by province, district and year.

24  
25 372 **Weaknesses:** The study has several limitations. Firstly, missing or invalid weight/height measurements (especially  
26  
27 373 in wave 2, and among infants – Supplementary Material 7) may have introduced selection bias (if not missing at  
28  
29 374 random), and may thus have affected both the internal validity and the representativeness the findings in the  
30  
31 375 broader South African context. Secondly as the primary panel study was not designed/powerd for provincial  
32  
33 376 <sup>14</sup>and lower geographic level analysis, we cannot discount the resultant impact on precision/random variability  
34  
35 377 when analysing at provincial/district level (administrative tier just below province) and further stratification by  
36  
37 378 socio-demographic correlates. Thirdly, we cannot discount the effect of inter-observer variability across different  
38  
39 379 study districts, despite extensive interviewer training and standardization of study protocols. All anthropometric  
40  
41 380 measurements (e.g. weight, height) were taken in duplicate in NIDS<sup>26</sup> which would have ensured better  
42  
43 381 reliability.

44  
45 382 **Cost of malnutrition, policy and research needs:** Estimating the cost of child malnutrition in South Africa is  
46  
47 383 extremely complicated and no locally-determined cost data exist. Data from the United States, suggest that the  
48  
49 384 incremental lifetime direct medical cost for a 10-year-old obese child relative to a 10-year-old normal weight child  
50  
51 385 ranges from USD 12 660 to USD 19 630<sup>55</sup>. Estimates of the cost of treating wasted children are approximately  
52  
53 386 USD 200 per child<sup>56</sup> while stunting has been consistently linked to worse economic outcomes in adulthood<sup>57</sup> and  
54  
55 387 estimates suggest that, on average, the future per capita income penalty for a stunted individual could be as large  
56  
57

58  
59 <sup>3</sup> <https://southafrica-info.com/people/mapping-poverty-in-south-africa/>  
60

1  
2  
3 388 as 9-10% in SSA <sup>58</sup>. Urgent investments are needed to accelerate the reduction of all forms of malnutrition, as  
4  
5 389 well as to curb the obesity epidemic among young children in South Africa. There is also considerable evidence  
6  
7 390 indicates that childhood wasting and stunting can be reduced by 60% and 20% respectively using ten nutrition-  
8  
9 391 specific interventions <sup>59</sup>, with an estimated return on investment (ROI) of 18:1, i.e. for USD 1 spent on  
10  
11 392 implementing effective programmes there would be USD 18 return in future economic benefits <sup>60</sup>. Very few  
12  
13 393 obesity prevention interventions targeting children have been effective and a comprehensive multifaceted strategy  
14  
15 394 tackling diet, physical inactivity, coupled with psychosocial support and local food environment change may  
16  
17 395 prove more effective. Nutrition policies tackling child obesity must promote household nutrition security and  
18  
19 396 healthy growth, decrease overconsumption of nutrient-poor foods, better shield children from increasingly  
20  
21 397 pervasive marketing of energy-dense, nutrient-poor foods and sugar sweetened beverages as well as reduction of  
22  
23 398 growing physical inactivity <sup>61</sup>.

24  
25 399 Our findings suggest the need to implement evidence-based child health strategies and policy (e.g. further social  
26  
27 400 grant support to vulnerable and impoverished households) that is tailored to specific geographies and socially  
28  
29 401 disadvantaged sub-populations. A higher prevalence of child thinness/wasting among younger mothers (<25) in  
30  
31 402 poorer, food insecure household, highlights the importance of policies that enable younger mothers to adequately  
32  
33 403 care for their children in all settings. Integrated nutrition programs in low and middle income countries (LMIC)  
34  
35 404 have had a substantial impact on child nutrition and health via a combination of multisector targeted interventions  
36  
37 405 <sup>62</sup>. Furthermore implementation and/or strengthening of school-based food program can provide a launching pad  
38  
39 406 for preventive programs including education and awareness, provision of healthier/more nutrition food options  
40  
41 407 and micronutrient supplementation, deworming, increased immunization coverage and improved growth  
42  
43 408 monitoring as well as counselling <sup>62</sup>. This may be especially true of obese children where high prevalence was  
44  
45 409 observed in higher income households with higher food purchasing power and where local food environments are  
46  
47 410 likely is likely to be an important contextual determinant. A further contextual trend which may further compound  
48  
49 411 this problem is the rapidly rising median household income observed over the period (from ZAR1400 in 2008 to  
50  
51 412 ZAR 3640 by 2017).

## 52 413 **Conclusions**

53  
54  
55 414 The heterogeneity of malnutrition is a feature of spatial inequality and rapid urbanization that has manifested in  
56  
57 415 widening levels of inequality in South Africa's districts and a need to reassess where nutrition programmes need  
58  
59 416 to be further decentralised to the highest risk municipalities and local communities to maximise effectiveness.  
60



1  
2  
3 417 This work provides the first district level ranking of childhood overweight, thinness/wasting and stunting and  
4  
5 418 allows a differentiated pro-active tailored intervention to be developed for each municipal district. The dual  
6  
7 419 epidemic of undernutrition and overweight/obesity requires differential geographical policy inputs in metropolitan  
8  
9 420 areas and districts across the rural-urban divide. The current and future health cost of malnutrition among South  
10  
11 421 African children is likely substantial based on previous costing estimates. There is an urgent need to address  
12  
13 422 nutrition problems among preschool aged children in South Africa and other low and middle income countries.  
14  
15 423 Effective public health planning and geographically/contextually tailored interventions are required at sub-  
16  
17 424 national level to address this challenge. The analytical framework employed in this study we believe will have  
18  
19 425 definite utility in other settings.  
20

## 21 426 **References**

- 22  
23  
24 427 1. Development Initiatives. 2018 Global Nutrition Report: Shining a light to spur action on nutrition.  
25 428 Bristol, UK: Development Initiatives, 2018.
- 26 429 2. Finucane MM, Stevens G, Cowan M, et al. Global Burden of Metabolic Risk Factors of Chronic  
27 430 Diseases Collaborating Group (Body Mass Index) National, regional, and global trends in body-  
28 431 mass index since 1980: systematic analysis of health examination surveys and epidemiological  
29 432 studies with 960 country-years and 9.1 million participants. *Lancet* 2011;377(9765):557-67.
- 30 433 3. Collaborators TGO. Health Effects of Overweight and Obesity in 195 Countries over 25 Years. *New*  
31 434 *England Journal of Medicine*;0(0):null. doi: 10.1056/NEJMoa1614362
- 32 435 4. Collaboration NRF. Trends in adult body-mass index in 200 countries from 1975 to 2014: a pooled  
33 436 analysis of 1698 population-based measurement studies with 19· 2 million participants. *The*  
34 437 *Lancet* 2016;387(10026):1377-96.
- 35 438 5. Bleich SN, Vercammen KA, Zatz LY, et al. Interventions to prevent global childhood overweight and  
36 439 obesity: a systematic review. *The Lancet Diabetes & Endocrinology* 2017
- 37 440 6. Malik VS, Willett WC, Hu FB. Global obesity: trends, risk factors and policy implications. *Nature*  
38 441 *Reviews Endocrinology* 2013;9(1):13-27.
- 39 442 7. Bain LE, Awah PK, Geraldine N, et al. Malnutrition in Sub-Saharan Africa: burden, causes and  
40 443 prospects. *Pan African Medical Journal* 2013;15(1)
- 41 444 8. Rossouw HA, Grant CC, Viljoen M. Overweight and obesity in children and adolescents: The South  
42 445 African problem. *South African journal of science* 2012;108(5-6):31-37.
- 43 446 9. Keino S, Plasqui G, Ettyang G, et al. Determinants of stunting and overweight among young children  
44 447 and adolescents in sub-Saharan Africa. *Food and nutrition bulletin* 2014;35(2):167-78.
- 45 448 10. Osgood-Zimmerman A, Milllear AI, Stubbs RW, et al. Mapping child growth failure in Africa  
46 449 between 2000 and 2015. *Nature* 2018;555(7694):41.
- 47 450 11. Cois A, Day C. Obesity trends and risk factors in the South African adult population. *BMC obesity*  
48 451 2015;2(1):42.
- 49 452 12. Sartorius B, Veerman LJ, Manyema M, et al. Determinants of obesity and associated population  
50 453 attributability, South Africa: Empirical evidence from a national panel survey, 2008-2012. *PloS*  
51 454 *one* 2015;10(6):e0130218.
- 52 455 13. Von Elm E, Altman DG, Egger M, et al. The Strengthening the Reporting of Observational Studies in  
53 456 Epidemiology (STROBE) statement: guidelines for reporting observational studies. *Journal of*  
54 457 *clinical epidemiology* 2008;61(4):344-49.
- 55 458 14. Leibbrandt M, Woolard I, de Villiers L. Methodology: Report on NIDS wave 1. *Technical paper*  
56 459 2009;1  
57  
58  
59  
60

15. Southern Africa Labour and Development Research Unit. National Income Dynamics Study 2017, Wave 5 [dataset]. Version 1.0.0 In: Pretoria: Department of Planning M, and Evaluation [funding agency]. Cape Town: Southern Africa Labour and Development Research Unit [implementer], 2018. , ed.: Cape Town: DataFirst [distributor], 2018., 2018.
16. Health WHONf. WHO child growth standards: growth velocity based on weight, length and head circumference: methods and development: World Health Organization 2009.
17. Organization WH, Health WHONf. WHO child growth standards: head circumference-for-age, arm circumference-for-age, triceps skinfold-for-age and subscapular skinfold-for-age: methods and development: World Health Organization 2007.
18. Gibson RS. Principles of nutritional assessment: Oxford university press, USA 2005.
19. Anselin L, Syabri I, Kho Y. GeoDa: an introduction to spatial data analysis. *Geographical analysis* 2006;38(1):5-22.
20. Abellan JJ, Richardson S, Best N. Use of space–time models to investigate the stability of patterns of disease. *Environmental health perspectives* 2008;116(8):1111-19.
21. Besag J, York J, Mollié A. Bayesian image restoration, with two applications in spatial statistics. *Annals of the institute of statistical mathematics* 1991;43(1):1-20.
22. Wakefield J, Best N, Waller L. Bayesian approaches to disease mapping. *Spatial epidemiology: methods and applications* 2000:104-07.
23. Organization WH. Global nutrition targets 2025: Policy brief series: World Health Organization, 2014.
24. Richardson S, Thomson A, Best N, et al. Interpreting posterior relative risk estimates in disease-mapping studies. *Environmental Health Perspectives* 2004;112(9):1016-25.
25. Gelman A, Rubin DB. Inference from iterative simulation using multiple sequences. *Statistical science* 1992;7(4):457-72.
26. Zere E, McIntyre D. Inequities in under-five child malnutrition in South Africa. *International journal for equity in health* 2003;2(1):7.
27. Jinabhai C, Taylor M, Sullivan K. Implications of the prevalence of stunting, overweight and obesity amongst South African primary school children: a possible nutritional transition? *European journal of clinical nutrition* 2003;57(2):358.
28. Armstrong ME, Lambert MI, Lambert EV. Secular trends in the prevalence of stunting, overweight and obesity among South African children (1994–2004). *European journal of clinical nutrition* 2011;65(7):835.
29. Kandala N-B, Madungu TP, Emina JB, et al. Malnutrition among children under the age of five in the Democratic Republic of Congo (DRC): does geographic location matter? *BMC public health* 2011;11(1):261.
30. Bredenkamp C, Buisman LR, Van de Poel E. Persistent inequalities in child undernutrition: evidence from 80 countries, from 1990 to today. *International Journal of Epidemiology* 2014;43(4):1328-35.
31. Di Cesare M, Bhatti Z, Soofi SB, et al. Geographical and socioeconomic inequalities in women and children's nutritional status in Pakistan in 2011: an analysis of data from a nationally representative survey. *The Lancet Global Health* 2015;3(4):e229-e39.
32. Ataguba JE, Akazili J, McIntyre D. Socioeconomic-related health inequality in South Africa: evidence from General Household Surveys. *International journal for equity in health* 2011;10(1):48.
33. Van de Poel E, Hosseinpoor AR, Speybroeck N, et al. Socioeconomic inequality in malnutrition in developing countries. *Bulletin of the World Health Organization* 2008;86:282-91.
34. Delpuech F, Traissac P, Martin-Prével Y, et al. Economic crisis and malnutrition: socioeconomic determinants of anthropometric status of preschool children and their mothers in an African urban area. *Public health nutrition* 2000;3(1):39-47.
35. Oyvat C. Agrarian structures, urbanization, and inequality. *World Development* 2016;83:207-30.
36. Hoddinott J, Haddad L. Does female income share influence household expenditures? Evidence from Côte d'Ivoire. *oxford Bulletin of Economics and Statistics* 1995;57(1):77-96.

1  
2  
3  
4  
5  
6  
7  
8  
9  
10  
11  
12  
13  
14  
15  
16  
17  
18  
19  
20  
21  
22  
23  
24  
25  
26  
27  
28  
29  
30  
31  
32  
33  
34  
35  
36  
37  
38  
39  
40  
41  
42  
43  
44  
45  
46  
47  
48  
49  
50  
51  
52  
53  
54  
55  
56  
57  
58  
59  
60

37. Aryastami NK, Shankar A, Kusumawardani N, et al. Low birth weight was the most dominant predictor associated with stunting among children aged 12–23 months in Indonesia. *BMC Nutrition* 2017;3(1):16.
38. de Bernabé JV, Soriano T, Albaladejo R, et al. Risk factors for low birth weight: a review. *European Journal of Obstetrics & Gynecology and Reproductive Biology* 2004;116(1):3-15.
39. Frank TD, Carter A, Jahagirdar D, et al. Global, regional, and national incidence, prevalence, and mortality of HIV, 1980–2017, and forecasts to 2030, for 195 countries and territories: a systematic analysis for the Global Burden of Diseases, Injuries, and Risk Factors Study 2017. *The Lancet HIV* 2019
40. Xiao P-L, Zhou Y-B, Chen Y, et al. Association between maternal HIV infection and low birth weight and prematurity: a meta-analysis of cohort studies. *BMC pregnancy and childbirth* 2015;15(1):246.
41. Althabe F, Moore JL, Gibbons L, et al. Adverse maternal and perinatal outcomes in adolescent pregnancies: The Global Network’s Maternal Newborn Health Registry study. *Reproductive health* 2015;12(2):S8.
42. Patel D, Bland R, Coovadia H, et al. Breastfeeding, HIV status and weights in South African children: a comparison of HIV-exposed and unexposed children. *Aids* 2010;24(3):437-45.
43. Wamani H, Åström AN, Peterson S, et al. Boys are more stunted than girls in sub-Saharan Africa: a meta-analysis of 16 demographic and health surveys. *BMC pediatrics* 2007;7(1):17.
44. Redding S, Conrey E, Porter K, et al. Pathways community care coordination in low birth weight prevention. *Maternal and child health journal* 2015;19(3):643-50.
45. Statistics South Africa. Recorded live births 2012. [www.statssa.gov.za/publications/P0305/P03052011.pdf](http://www.statssa.gov.za/publications/P0305/P03052011.pdf). 2012
46. Organization WH. WHA Global nutrition targets 2025: low birth weight policy brief. Geneva: WHO, 2014.[Accessed on: June 1st, 2017].
47. Monasta L, Batty G, Cattaneo A, et al. Early-life determinants of overweight and obesity: a review of systematic reviews. *Obesity reviews* 2010;11(10):695-708.
48. Kruger R, Kruger H, Macintyre U. The determinants of overweight and obesity among 10-to 15-year-old schoolchildren in the North West Province, South Africa—the THUSA BANA (Transition and Health during Urbanisation of South Africans; BANA, children) study. *Public health nutrition* 2006;9(3):351-58.
49. Pereira LM. The future of South Africa’s food system: What is research telling us. *SA Food Lab South Africa* 2014
50. McLachlan M, Landman A. Nutrition-sensitive agriculture—a South African perspective. *Food security* 2013;5(6):857-71.
51. Brophy S, Cooksey R, Gravenor MB, et al. Risk factors for childhood obesity at age 5: analysis of the millennium cohort study. *BMC public health* 2009;9(1):467.
52. Brunt H, Lester N, Davies G, et al. Childhood overweight and obesity: is the gap closing the wrong way? *Journal of public health* 2008;30(2):145-52.
53. Kim TJ, von dem Knesebeck O. Income and obesity: what is the direction of the relationship? A systematic review and meta-analysis. *BMJ open* 2018;8(1):e019862.
54. Rossouw HA, Grant CC, Viljoen M. Overweight and obesity in children and adolescents: the South African problem: review article. *South African Journal of Science* 2012;108(5-6):1-7.
55. Finkelstein EA, Graham WCK, Malhotra R. Lifetime direct medical costs of childhood obesity. *Pediatrics* 2014:peds. 2014-0063.
56. Horton S, Shekar M, Ajay M. Scaling up nutrition: What will it cost?: The World Bank 2009.
57. McGovern ME, Krishna A, Aguayo VM, et al. A review of the evidence linking child stunting to economic outcomes. *International journal of epidemiology* 2017;46(4):1171-91.
58. Sartorius K, Sartorius B, Winkler C, et al. 1. Abstract 2. Introduction 3. miRNA biogenesis, mRNA silencing and export into the extracellular space 3.1. Intracellular mRNA silencing 3.2. Extracellular mRNA silencing.

- 1  
2  
3 562 59. Vaivada T, Gaffey MF, Das JK, et al. Evidence-based interventions for improvement of maternal and  
4 563 child nutrition in low-income settings: what's new? *Current Opinion in Clinical Nutrition &*  
5 564 *Metabolic Care* 2017;20(3):204-10.  
6 565 60. Hoddinott J, Alderman H, Behrman JR, et al. The economic rationale for investing in stunting  
7 566 reduction. *Maternal & Child Nutrition* 2013;9:69-82.  
8 567 61. Lobstein T, Jackson-Leach R, Moodie ML, et al. Child and adolescent obesity: part of a bigger  
9 568 picture. *The lancet* 2015;385(9986):2510-20.  
10 569 62. UNICEF. Progress for children: a report card on nutrition: Unicef 2006.  
11  
12  
13 570  
14

### 15 571 **Authors' contributions**

16  
17  
18 572 BS contributed to the conceptualisation/design, methodology, data analysis, drafted the initial manuscript and  
19  
20 573 approved the final version of the manuscript. KS, RG, EL, PS and FT reviewed/edited the manuscript for critically  
21  
22 574 important intellectual content and approved the final version of the manuscript. AD and RS participated in funding  
23  
24 575 acquisition, conceptualisation/design, supervision, critically reviewed/edited the manuscript for critically  
25  
26 576 important intellectual content and approved the final version of the manuscript.  
27  
28

### 29 577 **Funding**

30  
31 578 This study forms part of the Sustainable and Healthy Food Systems (SHEFS) project supported by the Wellcome  
32  
33 579 Trust's Our Planet, Our Health programme (grant number 205200/Z/16/Z). The funders of the study had no role in  
34  
35 580 study design, data collection, data analysis, data interpretation or writing of the report.  
36  
37

### 38 581 **Competing interests**

39  
40  
41 582 None declared.  
42

### 43 583 **Patient consent for publication**

44  
45  
46 584 Not required.  
47  
48

### 49 585 **Ethics approval**

50  
51  
52 586 This study utilised open access data and hence ethical approval was not necessary.  
53  
54

### 55 587 **Data availability statement**

56  
57 588 Data are publically available at <https://www.datafirst.uct.ac.za/dataportal/index.php/catalog/NIDS/about>  
58  
59  
60 589

590 **Tables**591 **Table 1: Socio-demographic characteristics of sampled children by survey round**

| Variable                                                | Category              | Wave 1:<br>2008 | Wave 2:<br>2010/11 | Wave 3:<br>2012 | Wave 4:<br>2014/15 | Wave 5:<br>2017 |
|---------------------------------------------------------|-----------------------|-----------------|--------------------|-----------------|--------------------|-----------------|
|                                                         |                       | n (%)           | n (%)              | n (%)           | n (%)              | n (%)           |
| Age (in years)                                          | <1                    | 661 (20.3)      | 517 (14.6)         | 652 (17)        | 886 (19.7)         | 813 (17.3)      |
|                                                         | 1-1.99                | 661 (20.3)      | 621 (17.5)         | 691 (18)        | 875 (19.5)         | 909 (19.3)      |
|                                                         | 2-2.99                | 670 (20.6)      | 751 (21.2)         | 764 (19.9)      | 863 (19.2)         | 996 (21.1)      |
|                                                         | 3-3.99                | 642 (19.7)      | 840 (23.7)         | 826 (21.5)      | 914 (20.3)         | 992 (21.1)      |
|                                                         | 4-4.99                | 620 (19.1)      | 820 (23.1)         | 909 (23.7)      | 960 (21.3)         | 1000 (21.2)     |
| Gender                                                  | Male                  | 1640 (50.4)     | 1773 (50)          | 1856 (48.3)     | 2173 (48.3)        | 2325 (49.4)     |
|                                                         | Female                | 1614 (49.6)     | 1770 (49.9)        | 1986 (51.7)     | 2322 (51.6)        | 2385 (50.6)     |
| Ethnicity <sup>i</sup>                                  | African               | 2723 (83.7)     | 3047 (85.9)        | 3307 (86.1)     | 3898 (86.7)        | 4048 (85.9)     |
|                                                         | Coloured              | 429 (13.2)      | 423 (11.9)         | 455 (11.8)      | 532 (11.8)         | 523 (11.1)      |
|                                                         | Asian/Indian          | 32 (1)          | 26 (0.7)           | 24 (0.6)        | 30 (0.7)           | 0 (0)           |
|                                                         | White                 | 70 (2.2)        | 53 (1.5)           | 56 (1.5)        | 29 (0.6)           | 0 (0)           |
| Birthweight                                             | LBW (<2.5 kgs)        | 249 (7.7)       | 267 (7.5)          | 364 (9.5)       | 459 (10.2)         | 460 (9.8)       |
|                                                         | NBW (≥2.5 kgs)        | 2401 (73.8)     | 2553 (71.9)        | 3110 (80.9)     | 3605 (80.1)        | 3563 (75.6)     |
|                                                         | HBW (≥4 kgs)          | 105 (3.2)       | 99 (2.8)           | 121 (3.1)       | 156 (3.5)          | 157 (3.3)       |
|                                                         | Non-HBW (<4kgs)       | 2545 (78.2)     | 2721 (76.7)        | 3353 (87.3)     | 3908 (86.9)        | 3866 (82.1)     |
|                                                         | Missing BW            | 604 (18.6)      | 729 (20.5)         | 368 (9.6)       | 434 (9.6)          | 687 (14.6)      |
| Low monthly household income                            | <R2500                | 1737 (53.4)     | 1804 (50.8)        | 1660 (43.2)     | 1484 (33)          | 1202 (25.5)     |
|                                                         | ≥R2500                | 552 (17)        | 1014 (28.6)        | 1686 (43.9)     | 2749 (61.1)        | 3109 (66)       |
| Child hungry in last year (food security) <sup>ii</sup> | Never                 | 2148 (66)       | N/A                |                 |                    |                 |
|                                                         | Seldom                | 333 (10.2)      |                    |                 |                    |                 |
|                                                         | Sometimes             | 583 (17.9)      |                    |                 |                    |                 |
|                                                         | Often                 | 149 (4.6)       |                    |                 |                    |                 |
|                                                         | Always                | 35 (1.1)        |                    |                 |                    |                 |
| Province                                                | Eastern Cape          | 437 (13.4)      | 442 (12.5)         | 437 (11.4)      | 545 (12.1)         | 545 (11.6)      |
|                                                         | Free State            | 163 (5)         | 171 (4.8)          | 200 (5.2)       | 244 (5.4)          | 242 (5.1)       |
|                                                         | Gauteng               | 274 (8.4)       | 346 (9.7)          | 381 (9.9)       | 455 (10.1)         | 538 (11.4)      |
|                                                         | KwaZulu-Natal         | 1057 (32.5)     | 1076 (30.3)        | 1188 (30.9)     | 1449 (32.2)        | 1534 (32.6)     |
|                                                         | Limpopo               | 293 (9)         | 348 (9.8)          | 423 (11)        | 497 (11)           | 471 (10)        |
|                                                         | Mpumalanga            | 231 (7.1)       | 257 (7.2)          | 283 (7.4)       | 307 (6.8)          | 356 (7.6)       |
|                                                         | North West            | 226 (6.9)       | 240 (6.8)          | 269 (7)         | 293 (6.5)          | 296 (6.3)       |
|                                                         | Northern Cape         | 243 (7.5)       | 224 (6.3)          | 258 (6.7)       | 316 (7)            | 322 (6.8)       |
|                                                         | Western Cape          | 330 (10.1)      | 344 (9.7)          | 367 (9.6)       | 368 (8.2)          | 368 (7.8)       |
| Environment                                             | Rural Formal          | 324 (10)        | 350 (9.9)          | 343 (8.9)       | 389 (8.6)          | 449 (9.5)       |
|                                                         | Tribal Authority Area | 1583 (48.6)     | 1526 (43)          | 1801 (46.9)     | 2154 (47.9)        | 2135 (45.3)     |
|                                                         | Urban Formal          | 1133 (34.8)     | 1221 (34.4)        | 1319 (34.3)     | 1498 (33.3)        | 1702 (36.1)     |
|                                                         | Urban Informal        | 214 (6.6)       | 228 (6.4)          | 257 (6.7)       | 303 (6.7)          | 317 (6.7)       |
| Mother BMI                                              | Underweight           | 85 (2.6)        | 78 (2.2)           | 58 (1.5)        | 98 (2.2)           | 135 (2.9)       |
|                                                         | Normal                | 1010 (31)       | 1105 (31.1)        | 1250 (32.5)     | 1373 (30.5)        | 1485 (31.5)     |
|                                                         | Overweight            | 734 (22.6)      | 850 (24)           | 962 (25)        | 1054 (23.4)        | 1053 (22.4)     |
|                                                         | Obese                 | 932 (28.6)      | 987 (27.8)         | 1054 (27.4)     | 1377 (30.6)        | 1382 (29.3)     |
|                                                         | Missing               | 493 (15.2)      | 529 (14.9)         | 518 (13.5)      | 596 (13.3)         | 655 (13.9)      |
| Mother age                                              | <20                   | 234 (7.2)       | 238 (6.7)          | 259 (6.7)       | 316 (7)            | 322 (6.8)       |
|                                                         | 20-24                 | 807 (24.8)      | 872 (24.6)         | 971 (25.3)      | 1100 (24.5)        | 1062 (22.5)     |
|                                                         | 25-34                 | 1213 (37.3)     | 1413 (39.8)        | 1566 (40.8)     | 1853 (41.2)        | 2004 (42.5)     |



|                  |           |             |             |             |             |             |
|------------------|-----------|-------------|-------------|-------------|-------------|-------------|
|                  | 35-44     | 583 (17.9)  | 581 (16.4)  | 633 (16.5)  | 682 (15.2)  | 772 (16.4)  |
|                  | 45+       | 81 (2.5)    | 92 (2.6)    | 82 (2.1)    | 86 (1.9)    | 98 (2.1)    |
|                  | Missing   | 336 (10.3)  | 353 (9.9)   | 331 (8.6)   | 461 (10.2)  | 452 (9.6)   |
| Mother education | None      | 131 (4)     | 115 (3.2)   | 76 (2)      | 48 (1.1)    | 81 (1.7)    |
|                  | Primary   | 505 (15.5)  | 419 (11.8)  | 405 (10.5)  | 387 (8.6)   | 97 (2.1)    |
|                  | Secondary | 1871 (57.5) | 2265 (63.8) | 2654 (69.1) | 3176 (70.6) | 3130 (66.5) |
|                  | Tertiary  | 132 (4.1)   | 141 (4)     | 172 (4.5)   | 240 (5.3)   | 707 (15)    |
|                  | Missing   | 615 (18.9)  | 609 (17.2)  | 535 (13.9)  | 647 (14.4)  | 695 (14.8)  |

i: 139 misclassified or missing in 2017  
 ii: only included in wave 1 questionnaire

**Table 2: Burden of stunting, thinness/wasting and obesity among children by age and survey round**

| Survey wave | Age (in years) | N (valid HAZ) | n (stunted) | Prop: Stunted i             | Estimated Population stunted    | N (valid BMIZ) | n (thin /wasted) | Prop: Thinness ii           | Estimated Population thinness  | n (obese)  | Prop: obese iii             | Estimated Population obese       |
|-------------|----------------|---------------|-------------|-----------------------------|---------------------------------|----------------|------------------|-----------------------------|--------------------------------|------------|-----------------------------|----------------------------------|
| 2008        | 0              | 220           | 31          | 0.14 (0.09, 0.22)           | 153648 (81545, 273371)          | 180            | 21               | 0.12 (0.07, 0.2)            | 133882 (66374, 251867)         | 32         | 0.1 (0.06, 0.15)            | 107783 (59737, 185749)           |
|             | 1              | 419           | 29          | 0.08 (0.05, 0.13)           | 91903 (48436, 164369)           | 386            | 24               | 0.06 (0.03, 0.11)           | 66566 (29263, 143661)          | 76         | 0.22 (0.16, 0.3)            | 253021 (159436, 383096)          |
|             | 2              | 453           | 62          | 0.15 (0.1, 0.21)            | 159241 (96989, 250626)          | 419            | 10               | 0.03 (0.01, 0.07)           | 34613 (12484, 87598)           | 70         | 0.14 (0.1, 0.19)            | 148357 (93148, 227510)           |
|             | 3              | 489           | 55          | 0.11 (0.08, 0.15)           | 111595 (69906, 172639)          | 470            | 19               | 0.04 (0.02, 0.07)           | 39715 (20205, 75821)           | 67         | 0.17 (0.12, 0.24)           | 176235 (104092, 284620)          |
|             | 4              | 498           | 48          | 0.09 (0.06, 0.13)           | 93391 (54519, 154136)           | 461            | 25               | 0.05 (0.03, 0.08)           | 52031 (27083, 96623)           | 34         | 0.08 (0.05, 0.12)           | 80282 (45874, 135732)            |
|             | <b>0-5</b>     | <b>2079</b>   | <b>225</b>  | <b>0.11 (0.09, 0.13) iv</b> | <b>591550 (451494, 766049)</b>  | <b>1916</b>    | <b>99</b>        | <b>0.05 (0.04, 0.07) iv</b> | <b>277743 (196715, 385904)</b> | <b>279</b> | <b>0.14 (0.12, 0.17) iv</b> | <b>778865 (599156, 996439)</b>   |
| 2010/11     | 0              | 75            | 24          | 0.33 (0.16, 0.57)           | 289420 (114550, 577181)         | 69             | 7                | 0.1 (0.04, 0.23)            | 88499 (30258, 228461)          | 22         | 0.39 (0.21, 0.61)           | 340820 (153454, 615984)          |
|             | 1              | 236           | 20          | 0.06 (0.03, 0.11)           | 63995 (25204, 132218)           | 215            | 11               | 0.07 (0.03, 0.14)           | 69776 (25204, 173842)          | 52         | 0.29 (0.19, 0.41)           | 299127 (159624, 499489)          |
|             | 2              | 340           | 61          | 0.22 (0.16, 0.29)           | 267019 (166414, 407708)         | 314            | 17               | 0.06 (0.03, 0.11)           | 76344 (35363, 155183)          | 72         | 0.22 (0.16, 0.29)           | 270818 (167454, 414761)          |
|             | 3              | 427           | 52          | 0.11 (0.07, 0.16)           | 130531 (73921, 220389)          | 402            | 20               | 0.03 (0.02, 0.06)           | 39208 (16427, 85938)           | 78         | 0.16 (0.11, 0.23)           | 195314 (114988, 313258)          |
|             | 4              | 422           | 62          | 0.17 (0.12, 0.24)           | 205730 (122130, 329629)         | 394            | 19               | 0.03 (0.02, 0.06)           | 39494 (17639, 84450)           | 65         | 0.17 (0.12, 0.24)           | 208842 (126152, 329629)          |
|             | <b>0-5</b>     | <b>1500</b>   | <b>219</b>  | <b>0.16 (0.13, 0.19)</b>    | <b>862302 (633920, 1148376)</b> | <b>1394</b>    | <b>74</b>        | <b>0.05 (0.03, 0.07)</b>    | <b>265877 (167080, 405309)</b> | <b>289</b> | <b>0.21 (0.17, 0.26)</b>    | <b>1159133 (835398, 1565968)</b> |
| 2012        | 0              | 271           | 59          | 0.2 (0.14, 0.28)            | 181464 (108101, 288795)         | 250            | 38               | 0.2 (0.12, 0.3)             | 179118 (95658, 311389)         | 55         | 0.19 (0.12, 0.28)           | 169192 (94880, 284482)           |
|             | 1              | 544           | 78          | 0.13 (0.09, 0.17)           | 132310 (80796, 207206)          | 538            | 27               | 0.08 (0.05, 0.13)           | 80862 (40842, 150046)          | 138        | 0.23 (0.18, 0.28)           | 234062 (157153, 334626)          |
|             | 2              | 629           | 72          | 0.1 (0.07, 0.14)            | 116230 (68690, 187924)          | 629            | 49               | 0.05 (0.03, 0.07)           | 55866 (30861, 97391)           | 147        | 0.23 (0.18, 0.29)           | 269508 (176205, 392309)          |
|             | 3              | 710           | 82          | 0.11 (0.08, 0.16)           | 142259 (82987, 232297)          | 692            | 29               | 0.03 (0.02, 0.06)           | 43898 (20928, 87296)           | 102        | 0.15 (0.11, 0.2)            | 191943 (117798, 297399)          |
|             | 4              | 771           | 112         | 0.16 (0.12, 0.2)            | 221293 (142258, 330201)         | 762            | 30               | 0.03 (0.02, 0.05)           | 43556 (20731, 87406)           | 118        | 0.18 (0.14, 0.22)           | 250658 (167278, 362573)          |
|             | <b>0-5</b>     | <b>2925</b>   | <b>403</b>  | <b>0.13 (0.11, 0.16)</b>    | <b>762303 (567517, 1001855)</b> | <b>2871</b>    | <b>173</b>       | <b>0.06 (0.05, 0.07)</b>    | <b>328768 (230074, 458914)</b> | <b>560</b> | <b>0.19 (0.17, 0.22)</b>    | <b>1112487 (853832, 1415525)</b> |
| 2014/15     | 0              | 434           | 74          | 0.12 (0.08, 0.18)           | 144201 (81319, 240730)          | 421            | 37               | 0.1 (0.06, 0.18)            | 123211 (59233, 240730)         | 78         | 0.17 (0.12, 0.23)           | 197209 (117461, 313223)          |
|             | 1              | 801           | 53          | 0.06 (0.04, 0.08)           | 67916 (39433, 112566)           | 801            | 24               | 0.03 (0.01, 0.08)           | 39657 (9858, 101845)           | 169        | 0.23 (0.18, 0.28)           | 266780 (179421, 379240)          |
|             | 2              | 785           | 65          | 0.08 (0.05, 0.12)           | 85985 (48668, 146305)           | 781            | 16               | 0.02 (0.01, 0.03)           | 16222 (6309, 39015)            | 128        | 0.16 (0.12, 0.22)           | 170803 (106348, 263349)          |
|             | 3              | 853           | 82          | 0.08 (0.06, 0.11)           | 89857 (54478, 143034)           | 845            | 24               | 0.04 (0.02, 0.07)           | 40865 (18323, 86890)           | 79         | 0.12 (0.08, 0.15)           | 133857 (83637, 205862)           |
|             | 4              | 899           | 67          | 0.06 (0.04, 0.09)           | 77887 (45801, 127320)           | 897            | 19               | 0.02 (0.01, 0.05)           | 30376 (12301, 71898)           | 56         | 0.06 (0.04, 0.11)           | 82300 (38662, 166265)            |
|             | <b>0-5</b>     | <b>3772</b>   | <b>341</b>  | <b>0.08 (0.06, 0.09) iv</b> | <b>441281 (327611, 581707)</b>  | <b>3745</b>    | <b>120</b>       | <b>0.04 (0.03, 0.05) iv</b> | <b>213012 (130004, 333338)</b> | <b>510</b> | <b>0.14 (0.12, 0.17) iv</b> | <b>834444 (618820, 1098053)</b>  |
| 2017        | 0              | 372           | 50          | 0.13 (0.08, 0.19)           | 125347 (68160, 218303)          | 357            | 32               | 0.12 (0.07, 0.2)            | 121396 (62270, 221478)         | 70         | 0.18 (0.12, 0.25)           | 174538 (104344, 278066)          |
|             | 1              | 760           | 55          | 0.08 (0.05, 0.11)           | 95527 (56435, 153804)           | 742            | 23               | 0.03 (0.02, 0.07)           | 42416 (17767, 94222)           | 146        | 0.23 (0.19, 0.29)           | 285123 (194388, 403216)          |
|             | 2              | 833           | 63          | 0.07 (0.05, 0.11)           | 94807 (54147, 158550)           | 830            | 20               | 0.03 (0.02, 0.07)           | 43976 (18786, 99279)           | 130        | 0.15 (0.12, 0.19)           | 191812 (127079, 280056)          |
|             | 3              | 875           | 77          | 0.08 (0.05, 0.12)           | 99890 (54439, 175689)           | 872            | 14               | 0.02 (0.01, 0.06)           | 30726 (10888, 79204)           | 77         | 0.07 (0.05, 0.1)            | 88889 (54439, 138247)            |
|             | 4              | 900           | 59          | 0.05 (0.04, 0.07)           | 57363 (34849, 91231)            | 899            | 23               | 0.03 (0.01, 0.05)           | 29923 (13628, 62962)           | 47         | 0.06 (0.04, 0.08)           | 63912 (36990, 105365)            |
|             | <b>0-5</b>     | <b>3740</b>   | <b>304</b>  | <b>0.08 (0.06, 0.09) iv</b> | <b>445295 (326192, 593240)</b>  | <b>3700</b>    | <b>112</b>       | <b>0.04 (0.03, 0.05) iv</b> | <b>223236 (136790, 345514)</b> | <b>470</b> | <b>0.13 (0.11, 0.15) iv</b> | <b>758650 (583989, 964831)</b>   |

1

2

|                     |     |       |      |                   |                                  |       |     |                   |                            |       |                   |                                  |
|---------------------|-----|-------|------|-------------------|----------------------------------|-------|-----|-------------------|----------------------------|-------|-------------------|----------------------------------|
| 3                   | 4   | 5     | 6    | 7                 | 8                                | 9     | 10  | 11                | 12                         | 13    | 14                | 15                               |
| At last observation | 0-5 | 10711 | 1049 | 0.09 (0.08, 0.10) | 1 397 020 (1 177 247, 1 616 793) | 10467 | 391 | 0.04 (0.03, 0.05) | 560 806 (448 656, 672 957) | 1,438 | 0.14 (0.13, 0.16) | 2 048 650 (1 722 242, 2 375 058) |

5 596 i: HAZ  $\leq -2$  SD; ii BMI for age z-score  $\leq -2$ SD; iii BMI for age z-score  $\geq +2$ SD

6 597 iv: Significance tests (survey weighted logistic regression) among children 0-5: stunting (2017 vs 2008)  $p=0.007$ ; thinness/wasting (2017 vs

8 598 2008)  $p=0.131$ ; obesity (2017 vs 2008)  $p=0.312$

9 599

11 600 **Table 3:** Demographic, socio-economic and maternal factors associated with nutritional status among children

13 601 under 5 years, 2008-2017

| Variable                              | Category              | Stunted                |                        | p-value          | Thin/wasted            |                        | p-value          | Obese                  |                        | p-value          |
|---------------------------------------|-----------------------|------------------------|------------------------|------------------|------------------------|------------------------|------------------|------------------------|------------------------|------------------|
|                                       |                       | Yes (% col)            | No (% col)             |                  | Yes (% col)            | No (% col)             |                  | Yes (% col)            | No (% col)             |                  |
| Ethnicity                             | African               | 0.939<br>[.9027,.9619] | 0.871<br>[.8284,.9039] | <b>&lt;0.001</b> | 0.885<br>[.8155,.9306] | 0.879<br>[.8383,.9108] | 0.823            | 0.931<br>[.9017,.9522] | 0.870<br>[.8255,.9044] | <b>&lt;0.001</b> |
|                                       | Coloured              | 0.053<br>[.0311,.0879] | 0.074<br>[.0486,.1116] |                  | 0.076<br>[.0415,.1344] | 0.072<br>[.0474,.1081] |                  | 0.052<br>[.0333,.0789] | 0.076<br>[.0495,.1152] |                  |
|                                       | Asian/Indian          | 0.003 [4.0e-04,.0202]  | 0.012<br>[.0049,.0294] |                  | 0.015<br>[.0026,.077]  | 0.011<br>[.0046,.0278] |                  | 0.004 [8.4e-04,.0141]  | 0.013<br>[.0053,.0317] |                  |
|                                       | White                 | 0.006<br>[.0017,.0179] | 0.039<br>[.0238,.0627] |                  | 0.025<br>[.0083,.0711] | 0.037<br>[.0229,.0605] |                  | 0.014<br>[.0066,.0287] | 0.041<br>[.0248,.067]  |                  |
| Gender                                | Male                  | 0.562<br>[.5204,.603]  | 0.496<br>[.4797,.5121] | <b>0.002</b>     | 0.514<br>[.4543,.5742] | 0.501<br>[.4846,.5182] | 0.686            | 0.523<br>[.488,.5575]  | 0.498<br>[.481,.5151]  | 0.178            |
|                                       | Female                | 0.438<br>[.397,.4796]  | 0.504<br>[.4879,.5203] |                  | 0.486<br>[.4258,.5457] | 0.499<br>[.4818,.5154] |                  | 0.477<br>[.4425,.512]  | 0.502<br>[.4849,.519]  |                  |
| Birthweight                           | LBW (<2.5 kgs)        | 0.148<br>[.1143,.1891] | 0.098<br>[.0849,.1117] | <b>&lt;0.001</b> | 0.13<br>[.0891,.1867]  | 0.098<br>[.0858,.1111] | 0.163            | 0.072<br>[.0554,.0938] | 0.104<br>[.0919,.118]  | <b>0.006</b>     |
|                                       | NBW ( $\geq 2.5$ kgs) | 0.852<br>[.8109,.8857] | 0.903<br>[.8883,.9151] |                  | 0.87<br>[.8133,.9109]  | 0.902<br>[.8889,.9142] |                  | 0.928<br>[.9062,.9446] | 0.896<br>[.882,.9081]  |                  |
|                                       | HBW ( $\geq 4$ kgs)   | Not applicable         |                        |                  | Not applicable         |                        |                  | 0.056<br>[.0419,.0751] | 0.04<br>[.0323,.0496]  |                  |
|                                       | Non-HBW (<4kgs)       | Not applicable         |                        |                  | Not applicable         |                        |                  | 0.944<br>[.9249,.9581] | 0.96<br>[.9504,.9677]  |                  |
| Income quartile                       | Lowest                | 0.294<br>[.2567,.3334] | 0.199<br>[.1824,.2156] | <b>&lt;0.001</b> | 0.234<br>[.1805,.2973] | 0.203<br>[.1872,.2195] | 0.481            | 0.226<br>[.1936,.2617] | 0.2<br>[.1834,.2181]   | 0.422            |
|                                       | Low                   | 0.205<br>[.1714,.2423] | 0.187<br>[.1714,.2028] |                  | 0.214<br>[.1698,.2656] | 0.188<br>[.173,.2029]  |                  | 0.203<br>[.1725,.2377] | 0.186<br>[.1723,.2005] |                  |
|                                       | Middle                | 0.183<br>[.1555,.2148] | 0.200<br>[.1853,.2154] |                  | 0.169<br>[.1305,.2167] | 0.201<br>[.1871,.2162] |                  | 0.18<br>[.1501,.2135]  | 0.204<br>[.1891,.2189] |                  |
|                                       | High                  | 0.197<br>[.1579,.243]  | 0.186<br>[.1714,.2021] |                  | 0.184<br>[.1394,.2377] | 0.191<br>[.1751,.2074] |                  | 0.182<br>[.1445,.2269] | 0.192<br>[.1769,.2079] |                  |
|                                       | Highest               | 0.122<br>[.0924,.1583] | 0.229<br>[.2015,.2585] |                  | 0.2<br>[.1494,.2612]   | 0.218<br>[.1906,.2476] |                  | 0.209<br>[.1673,.2586] | 0.218<br>[.1915,.2478] |                  |
| Monthly household income              | <R2500                | 0.566<br>[.5213,.6101] | 0.417<br>[.3929,.4409] | <b>&lt;0.001</b> | 0.488<br>[.4228,.5544] | 0.423<br>[.3994,.4469] | <b>0.053</b>     | 0.481<br>[.4406,.5214] | 0.416<br>[.392,.4396]  | <b>0.001</b>     |
|                                       | $\geq$ R2500          | 0.434<br>[.3899,.4787] | 0.583<br>[.5591,.6071] |                  | 0.512<br>[.4456,.5772] | 0.577<br>[.5531,.6006] |                  | 0.519<br>[.4786,.5594] | 0.584<br>[.5604,.608]  |                  |
| Hungry in last year (food security) i | Never                 | 0.689<br>[.595,.7701]  | 0.697<br>[.6568,.7346] | 0.505            | 0.512<br>[.3895,.6337] | 0.704<br>[.6643,.7401] | <b>&lt;0.001</b> | 0.707<br>[.6302,.773]  | 0.693<br>[.6522,.7318] | 0.645            |
|                                       | Seldom                | 0.127<br>[.0669,.2286] | 0.096<br>[.0766,.1193] |                  | 0.111<br>[.056,.2074]  | 0.097<br>[.0765,.1219] |                  | 0.076<br>[.0499,.1138] | 0.102<br>[.0787,.13]   |                  |
|                                       | Sometimes             | 0.126<br>[.0807,.1919] | 0.155<br>[.1303,.184]  |                  | 0.317<br>[.219,.4354]  | 0.148<br>[.1243,.1752] |                  | 0.154<br>[.0994,.231]  | 0.155<br>[.1316,.1822] |                  |
|                                       | Often                 | 0.054<br>[.0265,.1049] | 0.043<br>[.0276,.0653] |                  | 0.052<br>[.0222,.1181] | 0.042<br>[.0272,.0655] |                  | 0.052<br>[.0272,.0981] | 0.041<br>[.0269,.0621] |                  |
|                                       | Always                | 0.004<br>[.0011,.0144] | 0.009<br>[.0048,.0173] |                  | 0.007<br>[.001,.0504]  | 0.009<br>[.0049,.0171] |                  | 0.011<br>[.0039,.0313] | 0.009<br>[.0048,.016]  |                  |
| Province                              | Eastern Cape          | 0.165<br>[.1137,.2336] | 0.132<br>[.0978,.1765] | <b>0.012</b>     | 0.075<br>[.0492,.1137] | 0.137<br>[.1007,.1838] | <b>0.002</b>     | 0.19<br>[.1321,.2643]  | 0.124<br>[.0916,.1652] | <b>&lt;0.001</b> |
|                                       | Free State            | 0.066<br>[.0441,.0961] | 0.050<br>[.036,.0678]  |                  | 0.032<br>[.0169,.0611] | 0.052<br>[.0376,.0709] |                  | 0.045<br>[.0298,.068]  | 0.052<br>[.0379,.071]  |                  |
|                                       | Gauteng               | 0.188<br>[.132,.2606]  | 0.236<br>[.1819,.2996] |                  | 0.298<br>[.1952,.4272] | 0.231<br>[.1784,.2937] |                  | 0.173<br>[.1234,.2365] | 0.246<br>[.1891,.3128] |                  |
|                                       | KwaZulu-Natal         | 0.218<br>[.1619,.2857] | 0.227<br>[.1801,.2819] |                  | 0.161<br>[.1151,.2195] | 0.228<br>[.1804,.2835] |                  | 0.293<br>[.217,.3834]  | 0.212<br>[.1691,.262]  |                  |
|                                       | Limpopo               | 0.143<br>[.0947,.2088] | 0.109<br>[.0816,.1444] |                  | 0.129<br>[.0823,.195]  | 0.113<br>[.0842,.1491] |                  | 0.074<br>[.0514,.105]  | 0.121<br>[.0902,.1599] |                  |

1  
2  
3  
4  
5  
6  
7  
8  
9  
10  
11  
12  
13  
14  
15  
16  
17  
18  
19  
20  
21  
22  
23  
24  
25  
26  
27  
28  
29  
30  
31  
32  
33  
34  
35  
36  
37  
38  
39  
40  
41  
42  
43  
44  
45  
46  
47  
48  
49  
50  
51  
52  
53  
54  
55  
56  
57  
58  
59  
60

|                  |                        |                        |                        |                  |                        |                        |              |                        |                        |              |
|------------------|------------------------|------------------------|------------------------|------------------|------------------------|------------------------|--------------|------------------------|------------------------|--------------|
|                  | Mpumalanga             | 0.085<br>[.0541,.1318] | 0.083<br>[.0621,.1102] |                  | 0.096<br>[.0611,.1487] | 0.082<br>[.0611,.1098] |              | 0.074<br>[.0506,.1079] | 0.085<br>[.0626,.1131] |              |
|                  | North West             | 0.055<br>[.0355,.0833] | 0.05<br>[.035,.0709]   |                  | 0.06<br>[.0376,.0943]  | 0.05<br>[.0346,.0712]  |              | 0.038<br>[.0252,.056]  | 0.053<br>[.0362,.076]  |              |
|                  | Northern Cape          | 0.022<br>[.0141,.0333] | 0.023<br>[.0163,.031]  |                  | 0.033<br>[.0217,.0489] | 0.022<br>[.0159,.0303] |              | 0.011<br>[.0072,.0156] | 0.025<br>[.0178,.0341] |              |
|                  | Western Cape           | 0.06<br>[.0321,.1089]  | 0.091<br>[.0606,.134]  |                  | 0.116<br>[.0638,.2016] | 0.086<br>[.0572,.1262] |              | 0.103<br>[.0626,.1641] | 0.084<br>[.0554,.1254] |              |
| Environment      | Rural/Tribal authority | 0.519<br>[.4417,.5963] | 0.451<br>[.3933,.5091] |                  | 0.429<br>[.3428,.5201] | 0.46<br>[.4021,.5193]  |              | 0.466<br>[.3857,.5479] | 0.457<br>[.4002,.5158] |              |
|                  | Urban Informal         | 0.122<br>[.0737,.1943] | 0.101<br>[.0628,.1592] |                  | 0.1<br>[.0557,.1743]   | 0.102<br>[.0636,.161]  |              | 0.133<br>[.0691,.239]  | 0.097<br>[.0618,.148]  |              |
|                  | Urban Formal           | 0.359<br>[.292,.4319]  | 0.448<br>[.389,.509]   | <b>&lt;0.001</b> | 0.47<br>[.3734,.5696]  | 0.437<br>[.3787,.4979] | 0.647        | 0.402<br>[.3261,.4821] | 0.446<br>[.3868,.5066] | 0.111        |
| Mother BMI       | Underweight            | 0.041<br>[.0271,.0604] | 0.022<br>[.0178,.0282] |                  | 0.051<br>[.0298,.0867] | 0.023<br>[.018,.0281]  |              | 0.019<br>[.01,.0351]   | 0.025<br>[.0198,.0311] |              |
|                  | Normal                 | 0.397<br>[.3521,.444]  | 0.344<br>[.3213,.3683] |                  | 0.418<br>[.3455,.4946] | 0.348<br>[.3251,.3724] |              | 0.327<br>[.2853,.3708] | 0.356<br>[.332,.3815]  |              |
|                  | Overweight             | 0.268<br>[.2311,.3092] | 0.273<br>[.2565,.289]  |                  | 0.249<br>[.199,.3064]  | 0.272<br>[.2565,.2881] |              | 0.26<br>[.23,.2922]    | 0.273<br>[.2567,.2899] |              |
|                  | Obese                  | 0.294<br>[.2452,.3479] | 0.361<br>[.3342,.3882] | <b>0.003</b>     | 0.282<br>[.2137,.3615] | 0.357<br>[.3298,.3853] | <b>0.005</b> | 0.395<br>[.3514,.4396] | 0.346<br>[.3175,.3753] | 0.135        |
| Mother age       | <20                    | 0.073<br>[.0562,.0947] | 0.048<br>[.0419,.0555] |                  | 0.112<br>[.0574,.206]  | 0.047<br>[.041,.0532]  |              | 0.057<br>[.0456,.0701] | 0.049<br>[.0418,.0562] |              |
|                  | 20-24                  | 0.219<br>[.1852,.2571] | 0.230<br>[.2152,.2459] |                  | 0.258<br>[.201,.3252]  | 0.23<br>[.2138,.2461]  |              | 0.265<br>[.2272,.3069] | 0.224<br>[.2091,.2405] |              |
|                  | 25-34                  | 0.468<br>[.4191,.5175] | 0.491<br>[.4705,.5107] |                  | 0.398<br>[.3311,.4691] | 0.492<br>[.4713,.5118] |              | 0.472<br>[.425,.5189]  | 0.49<br>[.4691,.511]   |              |
|                  | 35-44                  | 0.215<br>[.1731,.2638] | 0.210<br>[.191,.2297]  |                  | 0.213<br>[.1682,.2667] | 0.211<br>[.1923,.2301] |              | 0.191<br>[.1536,.236]  | 0.214<br>[.1952,.2348] |              |
|                  | 45+                    | 0.025<br>[.0161,.0381] | 0.021<br>[.0177,.0256] | 0.156            | 0.019<br>[.0089,.0388] | 0.022<br>[.018,.0261]  | <b>0.007</b> | 0.015<br>[.0095,.024]  | 0.023<br>[.0186,.0278] | 0.121        |
| Mother education | None                   | 0.023<br>[.0136,.0397] | 0.018<br>[.0144,.0226] |                  | 0.025<br>[.0127,.0479] | 0.019<br>[.0148,.0239] |              | 0.025<br>[.0157,.0406] | 0.018<br>[.014,.023]   |              |
|                  | Primary                | 0.121<br>[.0921,.1576] | 0.072<br>[.0625,.0835] |                  | 0.132<br>[.095,.1804]  | 0.071<br>[.061,.0825]  |              | 0.067<br>[.0488,.0925] | 0.075<br>[.0647,.0869] |              |
|                  | Secondary              | 0.799<br>[.7529,.8385] | 0.796<br>[.7777,.8134] |                  | 0.715<br>[.6506,.7712] | 0.802<br>[.7832,.8203] |              | 0.803<br>[.7595,.8398] | 0.798<br>[.7785,.8152] |              |
|                  | Tertiary               | 0.057<br>[.0364,.0868] | 0.114<br>[.0985,.1307] | <b>&lt;0.001</b> | 0.129<br>[.0862,.1874] | 0.108<br>[.0925,.1251] | <b>0.001</b> | 0.105<br>[.077,.1405]  | 0.11<br>[.0938,.1275]  | 0.568        |
| Father education | None                   | 0.003 [8.0e-04,.0082]  | 0.003<br>[.0017,.0051] |                  | 0.005 [6.7e-04,.00333] | 0.003<br>[.0017,.0051] |              | 0.002 [6.8e-04,.0053]  | 0.003<br>[.0018,.0057] |              |
|                  | Primary                | 0.646<br>[.5533,.7282] | 0.56<br>[.5162,.6028]  |                  | 0.565<br>[.4542,.6703] | 0.556<br>[.5118,.5984] |              | 0.584<br>[.499,.6637]  | 0.551<br>[.505,.5971]  |              |
|                  | Secondary              | 0.275<br>[.2008,.3629] | 0.389<br>[.3468,.4334] |                  | 0.382<br>[.2783,.4965] | 0.387<br>[.3448,.431]  |              | 0.318<br>[.2475,.3976] | 0.398<br>[.3529,.445]  |              |
|                  | Tertiary               | 0.077<br>[.0413,.1403] | 0.048<br>[.035,.0651]  | <b>0.020</b>     | 0.048<br>[.0206,.1099] | 0.055<br>[.0389,.0761] | 0.960        | 0.097<br>[.0502,.1779] | 0.047<br>[.0338,.0658] | <b>0.033</b> |

i: only included in wave 1 questionnaire



### a) Stunting prevalence by province and survey wave

### b) Stunting prevalence by district in 2017

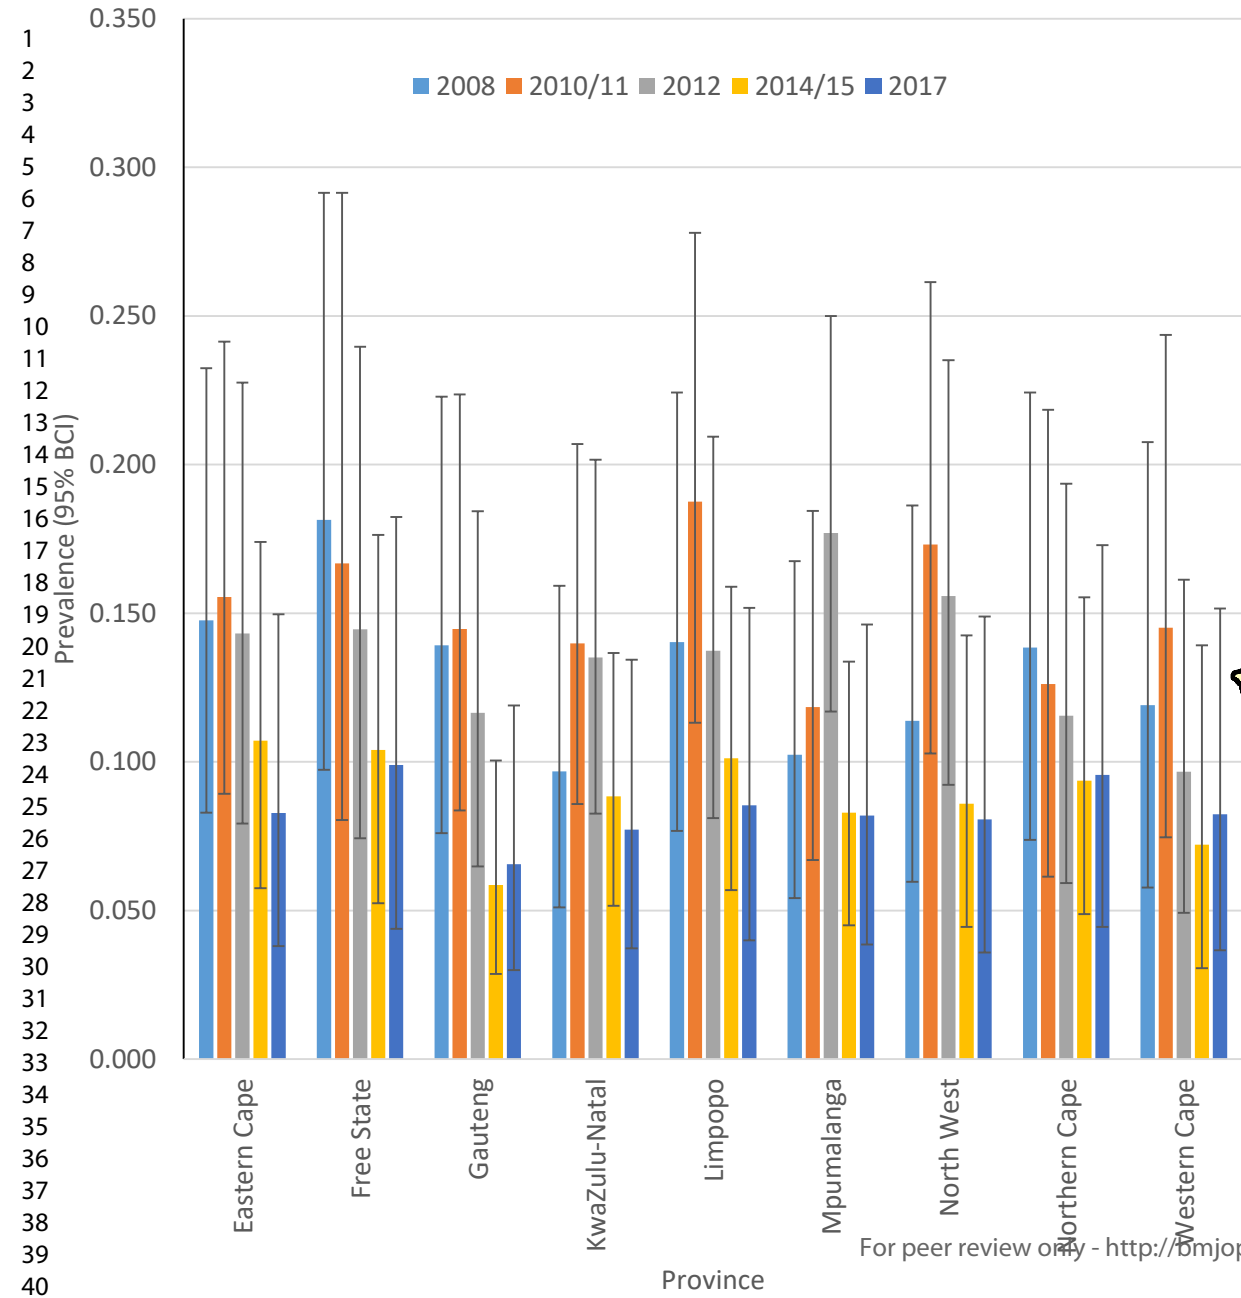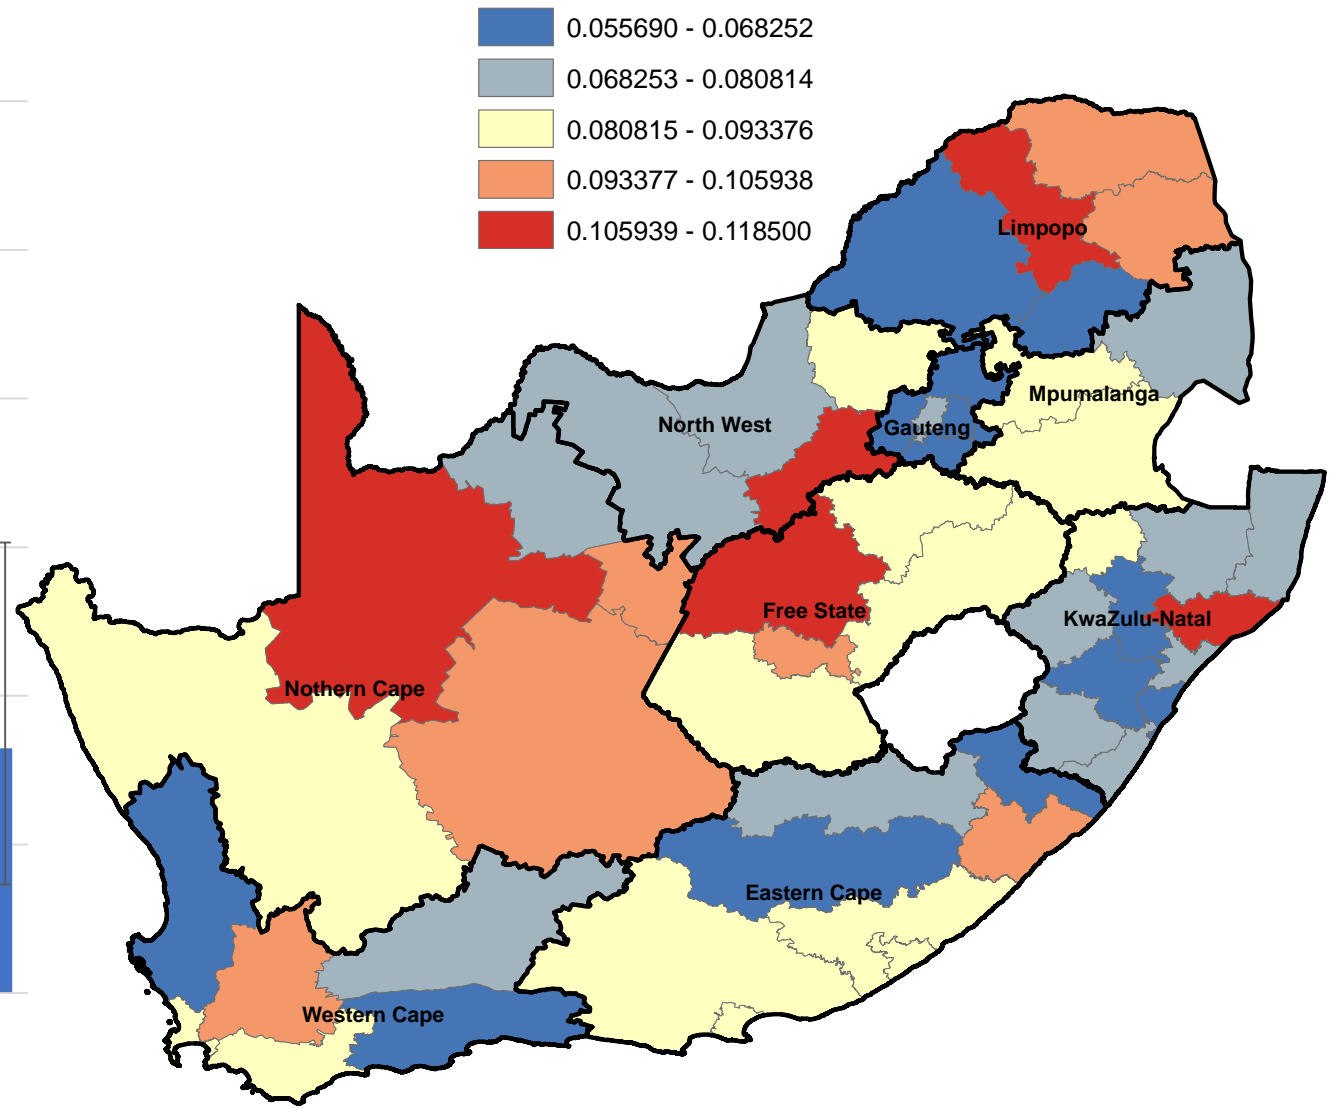

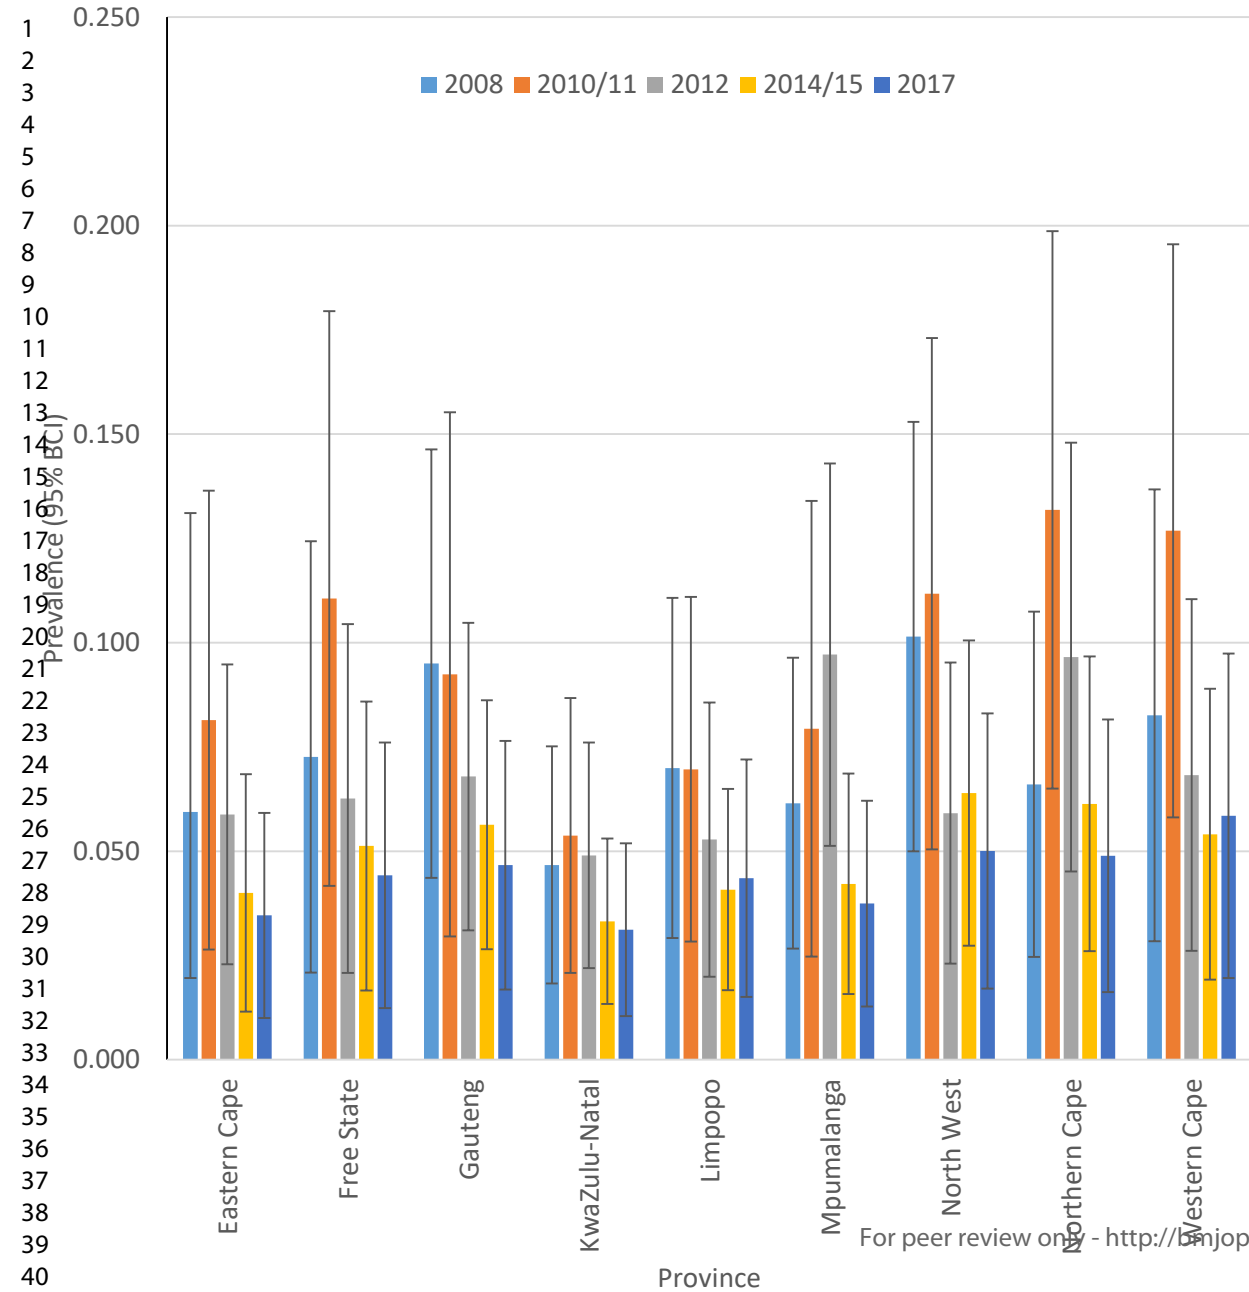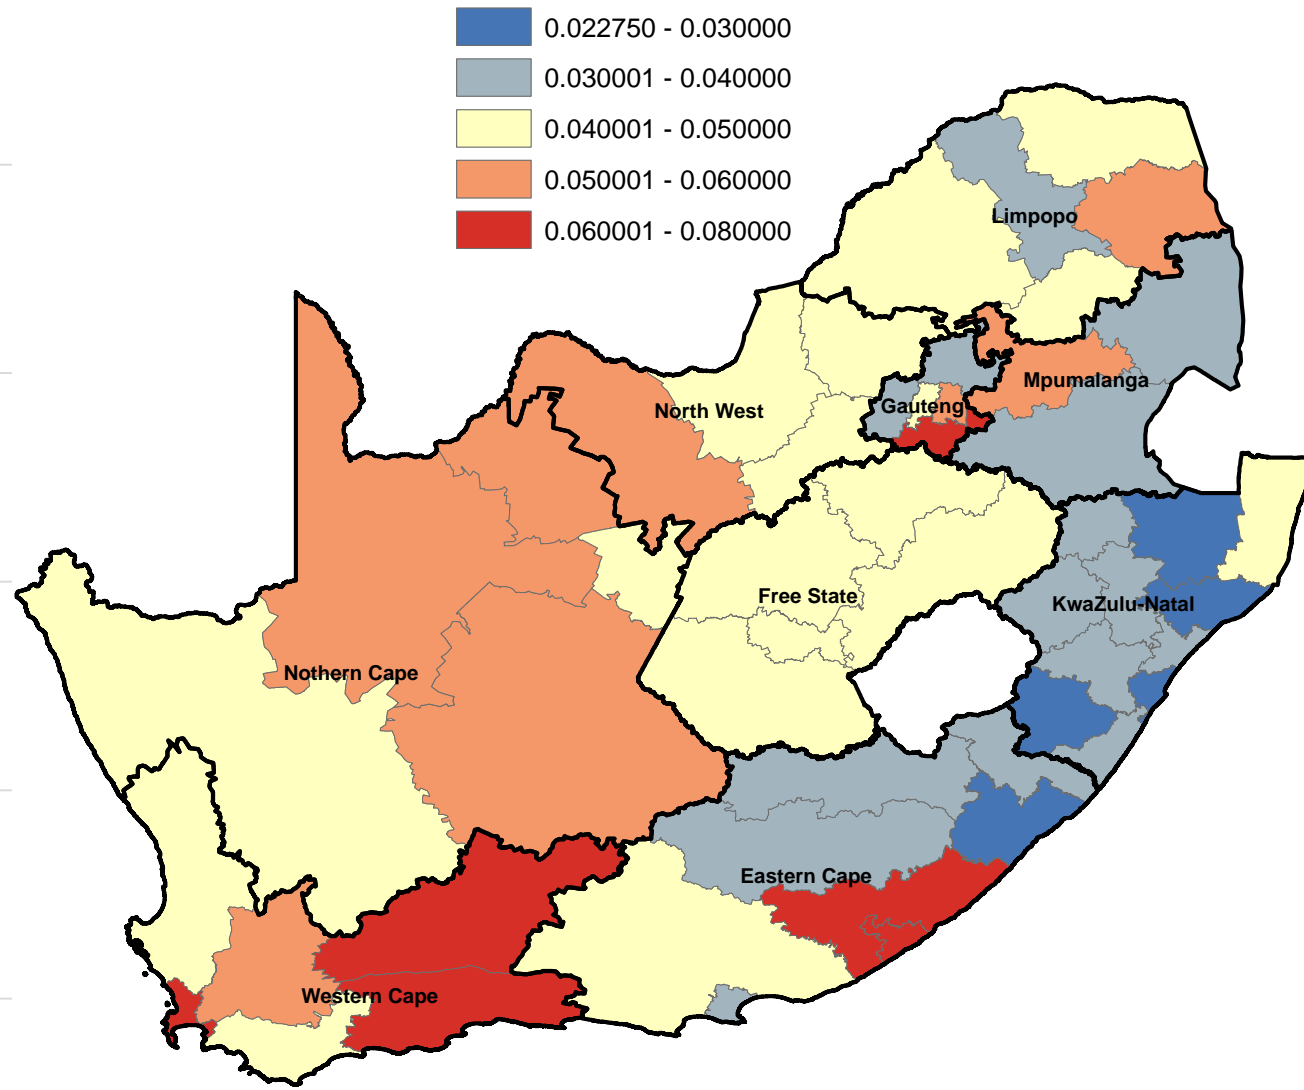

### a) Obesity prevalence by province and survey wave

### b) Obesity prevalence by district in 2017

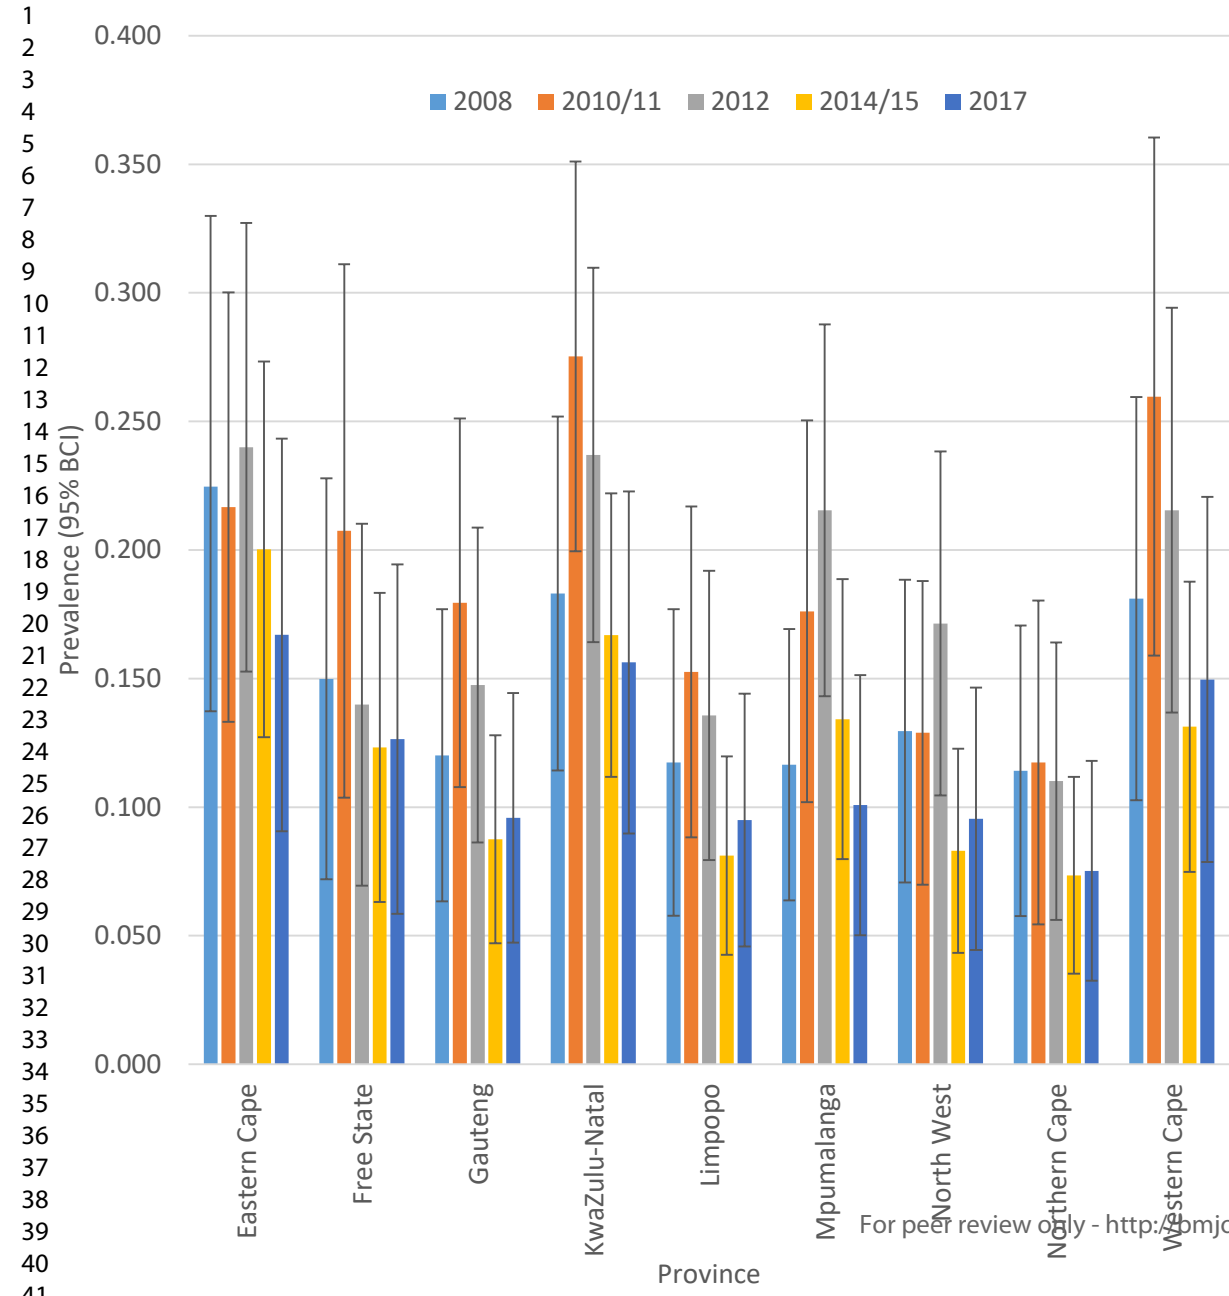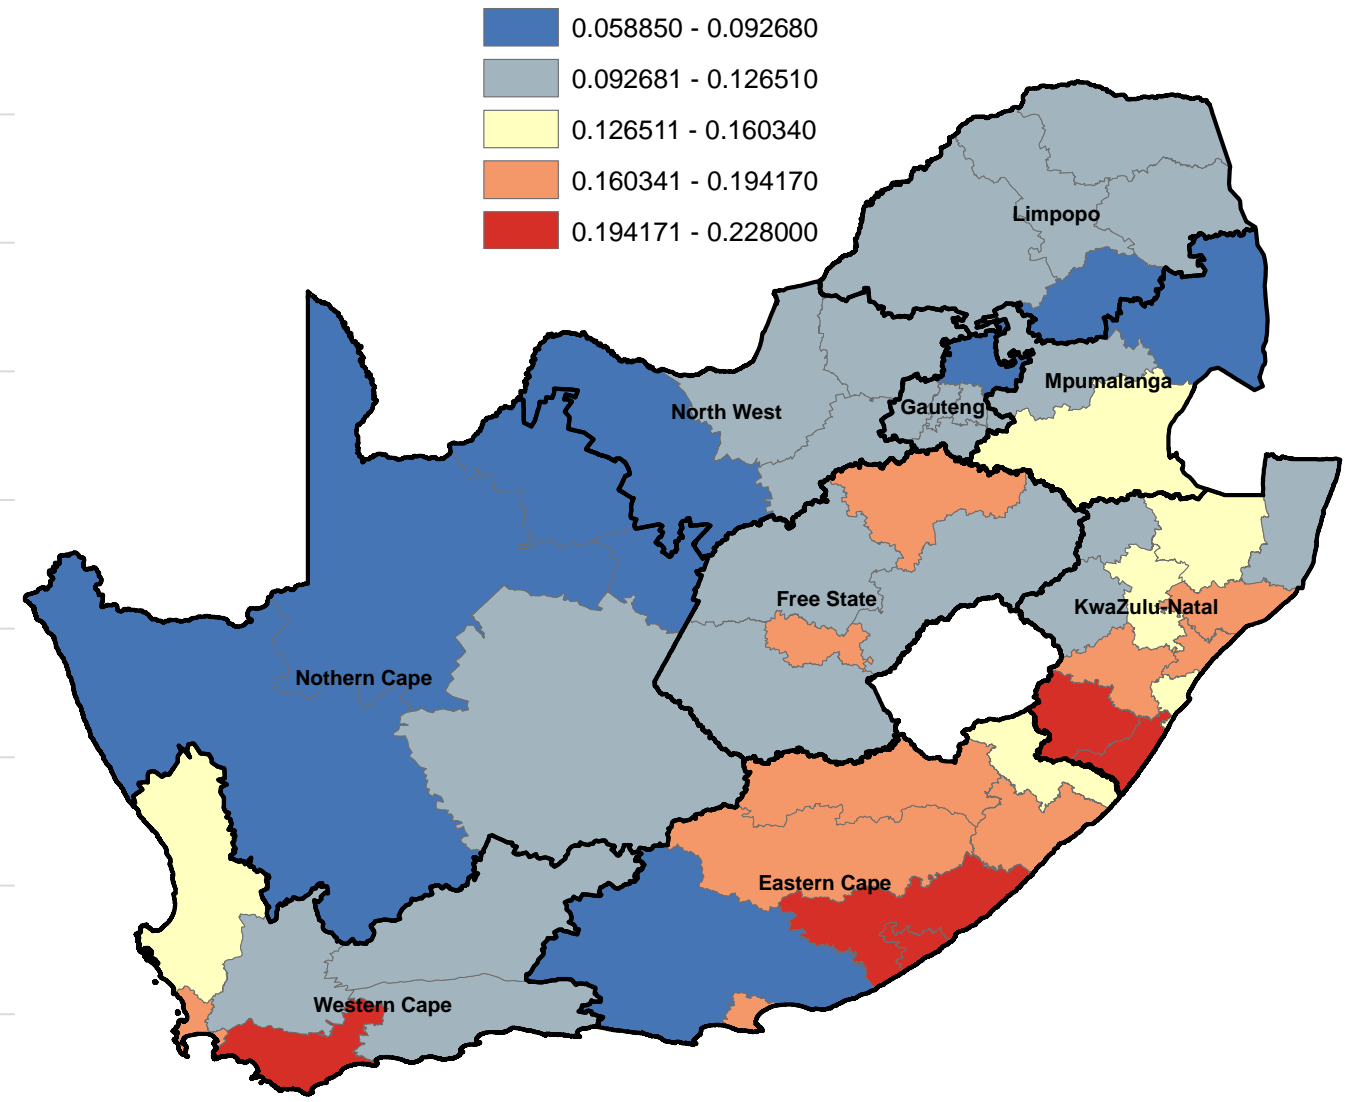

1  
2  
3  
4  
5  
6  
7  
8

## Supplementary Material

### Supplementary 1: STROBE Statement—Checklist of items that should be included in reports of cross-sectional studies

9  
10  
11  
12  
13  
14  
15  
16  
17  
18  
19  
20  
21  
22  
23  
24  
25  
26  
27  
28  
29  
30  
31  
32  
33  
34  
35  
36  
37  
38  
39  
40  
41  
42  
43  
44  
45  
46  
47  
48  
49  
50  
51  
52  
53  
54  
55  
56  
57  
58  
59  
60

|                           | Item No | Recommendation                                                                                                                                                                       | Page/line numbers               |
|---------------------------|---------|--------------------------------------------------------------------------------------------------------------------------------------------------------------------------------------|---------------------------------|
| <b>Title and abstract</b> | 1       | (a) Indicate the study's design with a commonly used term in the title or the abstract                                                                                               | 2/30                            |
|                           |         | (b) Provide in the abstract an informative and balanced summary of what was done and what was found                                                                                  | 2/28-47                         |
| <b>Introduction</b>       |         |                                                                                                                                                                                      |                                 |
| Background/rationale      | 2       | Explain the scientific background and rationale for the investigation being reported                                                                                                 | 3-4/67-84                       |
| Objectives                | 3       | State specific objectives, including any prespecified hypotheses                                                                                                                     | 4/82-84                         |
| <b>Methods</b>            |         |                                                                                                                                                                                      |                                 |
| Study design              | 4       | Present key elements of study design early in the paper                                                                                                                              | 4/89-100                        |
| Setting                   | 5       | Describe the setting, locations, and relevant dates, including periods of recruitment, exposure, follow-up, and data collection                                                      | 4/89-100                        |
| Participants              | 6       | (a) Give the eligibility criteria, and the sources and methods of selection of participants                                                                                          | 4/95-102                        |
| Variables                 | 7       | Clearly define all outcomes, exposures, predictors, potential confounders, and effect modifiers. Give diagnostic criteria, if applicable                                             | 4-5/103-117                     |
| Data sources/measurement  | 8*      | For each variable of interest, give sources of data and details of methods of assessment (measurement). Describe comparability of assessment methods if there is more than one group | 4/89-93; 5/113-117              |
| Bias                      | 9       | Describe any efforts to address potential sources of bias                                                                                                                            | 4/89-91; 8/200-2017             |
| Study size                | 10      | Explain how the study size was arrived at                                                                                                                                            | 4/89-91; Supplementary 10       |
| Quantitative variables    | 11      | Explain how quantitative variables were handled in the analyses. If applicable, describe which groupings were chosen and why                                                         | 4-5/104-110; 5/113-117          |
| Statistical methods       | 12      | (a) Describe all statistical methods, including those used to control for confounding                                                                                                | 5-7/118-189                     |
|                           |         | (b) Describe any methods used to examine subgroups and interactions                                                                                                                  | 5/113-117; 7/186-189            |
|                           |         | (c) Explain how missing data were addressed                                                                                                                                          | 8/204-207; Supplementary 7 & 8  |
|                           |         | (d) If applicable, describe analytical methods taking account of sampling strategy                                                                                                   | 5/120-123; 7/172-174; 7/186-189 |

|                          |     |                                                                                                                                                                                                              |                                                                         |
|--------------------------|-----|--------------------------------------------------------------------------------------------------------------------------------------------------------------------------------------------------------------|-------------------------------------------------------------------------|
|                          |     | (e) Describe any sensitivity analyses                                                                                                                                                                        | 8/204-205;<br>Supplementary 4b,<br>8                                    |
| <b>Results</b>           |     |                                                                                                                                                                                                              |                                                                         |
| Participants             | 13* | (a) Report numbers of individuals at each stage of study—eg numbers potentially eligible, examined for eligibility, confirmed eligible, included in the study, completing follow-up, and analysed            | 8/200-207;<br>Supplementary 7                                           |
|                          |     | (b) Give reasons for non-participation at each stage                                                                                                                                                         | 8/200-207;<br>Supplementary 7                                           |
|                          |     | (c) Consider use of a flow diagram                                                                                                                                                                           | Described using narrative text:<br>8/200-207; Table:<br>Supplementary 7 |
| Descriptive data         | 14* | (a) Give characteristics of study participants (eg demographic, clinical, social) and information on exposures and potential confounders                                                                     | Table 1                                                                 |
|                          |     | (b) Indicate number of participants with missing data for each variable of interest                                                                                                                          | 8/200-207; Table 1;<br>Supplementary 7                                  |
| Outcome data             | 15* | Report numbers of outcome events or summary measures                                                                                                                                                         | Table 1-3                                                               |
| Main results             | 16  | (a) Give unadjusted estimates and, if applicable, confounder-adjusted estimates and their precision (eg, 95% confidence interval). Make clear which confounders were adjusted for and why they were included | 8/209-273; Table 1-3                                                    |
|                          |     | (b) Report category boundaries when continuous variables were categorized                                                                                                                                    | 4/104-110                                                               |
|                          |     | (c) If relevant, consider translating estimates of relative risk into absolute risk for a meaningful time period                                                                                             | N/A                                                                     |
| Other analyses           | 17  | Report other analyses done—eg analyses of subgroups and interactions, and sensitivity analyses                                                                                                               | Supplementary 2,6,7,8,9,10                                              |
| <b>Discussion</b>        |     |                                                                                                                                                                                                              |                                                                         |
| Key results              | 18  | Summarise key results with reference to study objectives                                                                                                                                                     | 10-11/275-283                                                           |
| Limitations              | 19  | Discuss limitations of the study, taking into account sources of potential bias or imprecision. Discuss both direction and magnitude of any potential bias                                                   | 14/377-386                                                              |
| Interpretation           | 20  | Give a cautious overall interpretation of results considering objectives, limitations, multiplicity of analyses, results from similar studies, and other relevant evidence                                   | 11-15/296-417                                                           |
| Generalisability         | 21  | Discuss the generalisability (external validity) of the study results                                                                                                                                        | 11-13/296-370                                                           |
| <b>Other information</b> |     |                                                                                                                                                                                                              |                                                                         |
| Funding                  | 22  | Give the source of funding and the role of the funders for the present study and, if applicable, for the original study on which the present article is based                                                | 19/581-583                                                              |

## Supplementary 2: Spatial autocorrelation analyses for the 3 anthropometric outcomes (univariate and bivariate)

### *Pairwise correlation for anthropometric outcomes and bivariate spatial autocorrelation*

We have performed additional supplementary analyses (using GeoDa: Anselin L, Syabri I, Kho Y. GeoDa: an introduction to spatial data analysis. Geographical analysis. 2006 Jan;38(1):5-22) which assesses pairwise correlation/association between the 3 outcomes as well as bivariate Moran's I to assess if there was significant spatial autocorrelation between the outcomes. This analysis suggests that there is no significant association between stunting and thinness/wasting while there is weak positive but significant spatial autocorrelation between stunting and obesity prevalence as well as weak negative spatial correlation between thinness and obesity (please see detailed analyses below).

```
. spearman stunted_svy thin_svy

Number of obs =      256
Spearman's rho =    0.0729

Test of Ho: stunted_svy and thin_svy are independent
      Prob > |t| =    0.2452

. gllamm stunted_svy thin_svy, i(id)

number of level 1 units = 256
number of level 2 units = 52

Condition Number = 14.594452

gllamm model

log likelihood = 283.93295
```

| stunted_svy       | Coef.           | Std. Err.       | z           | P> z         | [95% Conf. Interval] |                 |
|-------------------|-----------------|-----------------|-------------|--------------|----------------------|-----------------|
| <b>thin_svy  </b> | <b>.0385636</b> | <b>.0726234</b> | <b>0.53</b> | <b>0.595</b> | <b>-.1037757</b>     | <b>.1809028</b> |
| _cons             | .1082981        | .0061531        | 17.60       | 0.000        | .0962381             | .120358         |

```
-----
Variance at level 1
-----
      .00637033 (.00056306)

Variances and covariances of random effects
-----
***level 2 (id)
      var(1): 2.643e-24 (5.133e-14)
-----
```



permutations: 99999  
 pseudo p-value: 0.290100

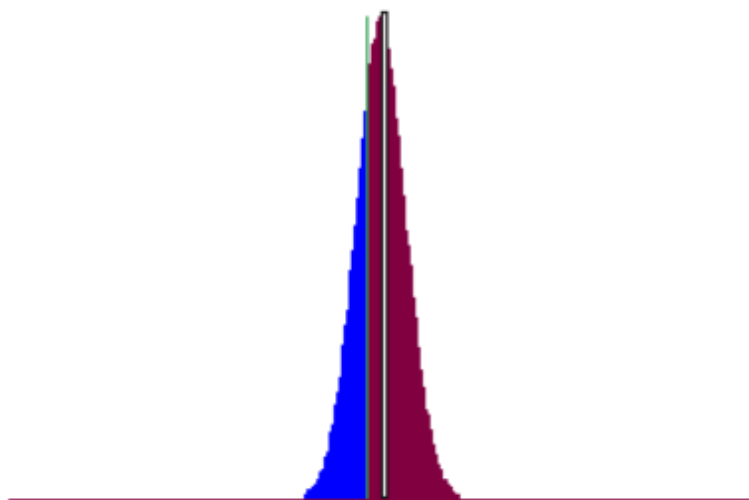

I: -0.0372 E[I]: -0.0196 mean: 0.0007 sd: 0.0690 z-value: -0.5492

```
. spearman stunted_svy obese_svy
```

Number of obs = 256  
**Spearman's rho = 0.2051**

Test of Ho: stunted\_svy and obese\_svy are independent  
**Prob > |t| = 0.0010**

```
. gllamm stunted_svy obese_svy , i(id)
```

number of level 1 units = 256  
 number of level 2 units = 52

Condition Number = 10.565877

gllamm model

log likelihood = 292.58012

| stunted_svy | Coef. | Std. Err. | z | P> z | [95% Conf. Interval] |
|-------------|-------|-----------|---|------|----------------------|
|-------------|-------|-----------|---|------|----------------------|



|                  |                 |                 |             |              |                 |                 |
|------------------|-----------------|-----------------|-------------|--------------|-----------------|-----------------|
| <b>obese_svy</b> | <b>.1980684</b> | <b>.0475478</b> | <b>4.17</b> | <b>0.000</b> | <b>.1048765</b> | <b>.2912604</b> |
| _cons            | .0791266        | .0090305        | 8.76        | 0.000        | .0614272        | .0968261        |

Variance at level 1

.00580379 (.00057983)

Variances and covariances of random effects

\*\*\*level 2 (id)

var(1): .00015837 (.00029997)

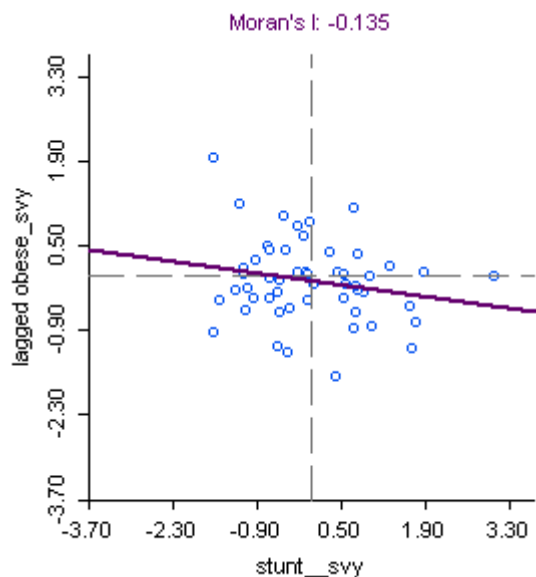

permutations: 99999

pseudo p-value: 0.025380

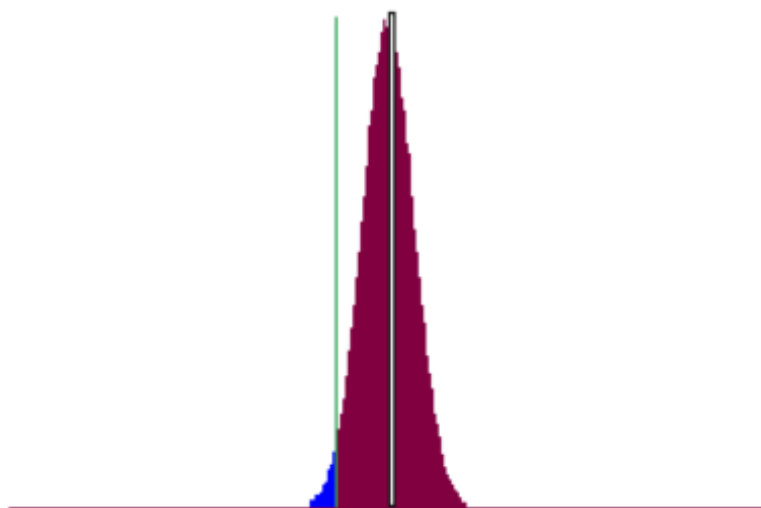

I: -0.1350 E[I]: -0.0196 mean: 0.0001 sd: 0.0689 z-value: -1.9600

. spearman thin\_svy obese\_svy

Number of obs = 256  
**Spearman's rho = -0.1424**

Test of Ho: thin\_svy and obese\_svy are independent

Prob > |t| = 0.0227

. gllamm thin\_svy obese\_svy , i(id)

number of level 1 units = 256

number of level 2 units = 52

Condition Number = 10.976401

gllamm model

log likelihood = 324.36079

| thin_svy           | Coef.           | Std. Err.      | z            | P> z         | [95% Conf. Interval]      |
|--------------------|-----------------|----------------|--------------|--------------|---------------------------|
| <b>obese_svy  </b> | <b>-.067802</b> | <b>.040258</b> | <b>-1.68</b> | <b>0.092</b> | <b>-.1467062 .0111022</b> |
| _cons              | .0602269        | .0078037       | 7.72         | 0.000        | .0449319 .0755218         |

Variance at level 1

.00447574 (.00044278)

Variances and covariances of random effects

\*\*\*level 2 (id)

var(1): .00018259 (.00023176)

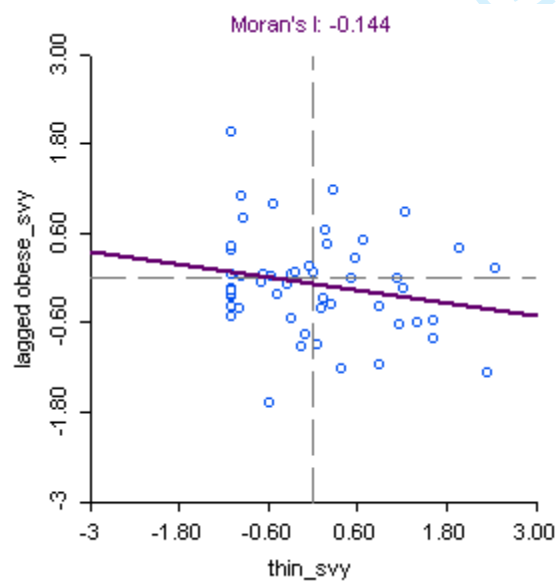

permutations: 99999  
 pseudo p-value: 0.020230

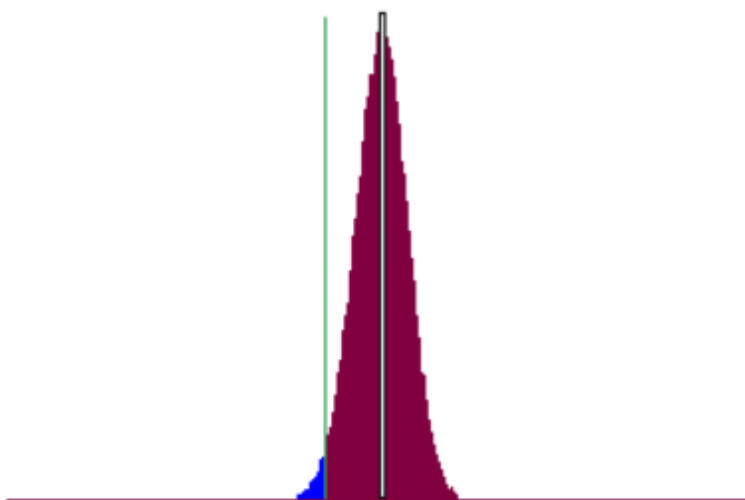

t: -0.1441 E[]: -0.0196 mean: 0.0057 sd: 0.0710 z-value: -2.1119

With regards to the shared temporal effect this we think can be retained as all 3 outcomes appear to have a negative coefficient associated with increasing panel or wave.

```
. gllamm stunted_svy year , i(id)
```

```
number of level 1 units = 256
number of level 2 units = 52
```

```
Condition Number = 31.724715
```

```
gllamm model
```

```
log likelihood = 293.64743
```

| stunted_svy | Coef.            | Std. Err.       | z            | P> z         | [95% Conf. Interval]        |
|-------------|------------------|-----------------|--------------|--------------|-----------------------------|
| year        | <b>-.0153423</b> | <b>.0033894</b> | <b>-4.53</b> | <b>0.000</b> | <b>-.0219855 - .0086992</b> |
| _cons       | .1563577         | .0112694        | 13.87        | 0.000        | .1342702 .1784453           |

```
Variance at level 1
```

```
.00590475 (.00052191)
```

```
Variances and covariances of random effects
```

```
***level 2 (id)
```

```
var(1): 8.887e-19 (4.854e-11)
```

```
. gllamm thin_svy year , i(id)
```

```
number of level 1 units = 256
number of level 2 units = 52
```

```
Condition Number = 37.175479
```

```
gllamm model
```

```
log likelihood = 327.11892
```

1  
2  
3  
4  
5  
6  
7  
8  
9  
10  
11  
12  
13  
14  
15  
16  
17  
18  
19  
20  
21  
22  
23  
24  
25  
26  
27  
28  
29  
30  
31  
32  
33  
34  
35  
36  
37  
38  
39  
40  
41  
42  
43  
44  
45  
46  
47  
48  
49  
50  
51  
52  
53  
54  
55  
56  
57  
58  
59  
60

| thin_svy | Coef.            | Std. Err.       | z            | P> z         | [95% Conf. Interval] |                 |
|----------|------------------|-----------------|--------------|--------------|----------------------|-----------------|
| year     | <b>-.0084373</b> | <b>.0028941</b> | <b>-2.92</b> | <b>0.004</b> | <b>-.0141096</b>     | <b>-.002765</b> |
| _cons    | .0749857         | .0098979        | 7.58         | 0.000        | .0555862             | .0943852        |

Variance at level 1

.00430301 (.00042507)

Variances and covariances of random effects

\*\*\*level 2 (id)

var(1): .00027197 (.0002388)

. gllamm obese\_svy year , i(id)

number of level 1 units = 256

number of level 2 units = 52

Condition Number = 21.597249

gllamm model

log likelihood = 215.4003

| obese_svy | Coef.            | Std. Err.       | z            | P> z         | [95% Conf. Interval] |                  |
|-----------|------------------|-----------------|--------------|--------------|----------------------|------------------|
| year      | <b>-.0112194</b> | <b>.0043125</b> | <b>-2.60</b> | <b>0.009</b> | <b>-.0196717</b>     | <b>-.0027671</b> |
| _cons     | .1905201         | .0155017        | 12.29        | 0.000        | .1601374             | .2209029         |

Variance at level 1

.00954712 (.00094327)

Variances and covariances of random effects

\*\*\*level 2 (id)

var(1): .00175973 (.00074487)

### ***Univariate spatial autocorrelation***

Based on the univariate Moran's I statistics for each anthropometric outcome there appeared to be significant spatial heterogeneity present for all 3 outcomes.

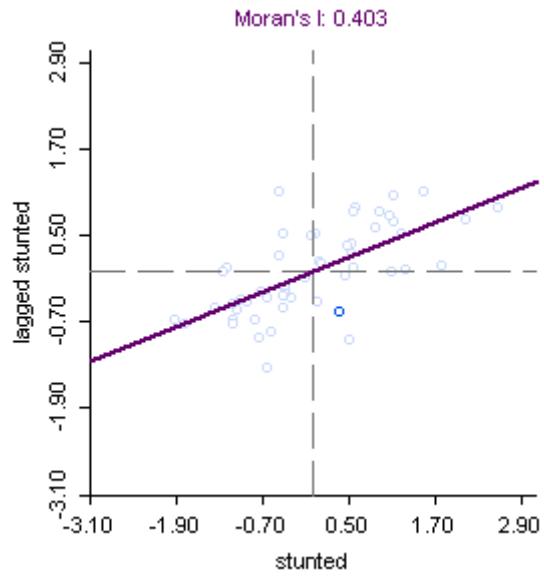

22  
23  
24  
25

permutations: 99999  
pseudo p-value: 0.000020

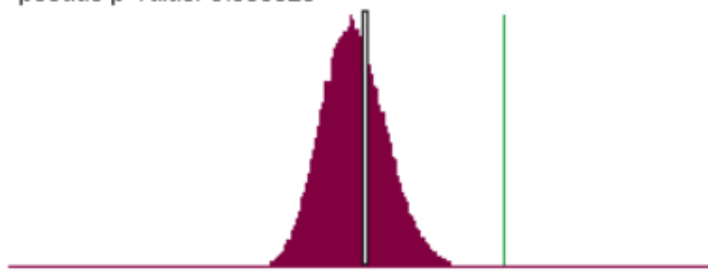

34  
35

I: 0.4027 E[I]: -0.0196 mean: -0.0202 sd: 0.0923 z-value: 4.5834

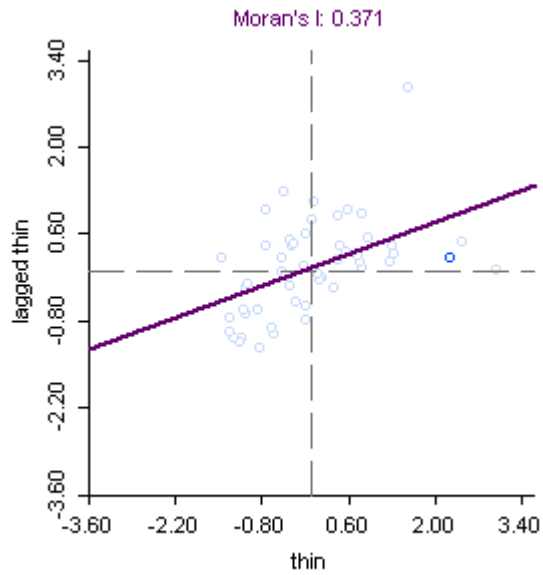

permutations: 99999  
pseudo p-value: 0.000130



t: 0.3707 E[I]: -0.0196 mean: -0.0196 sd: 0.0916 z-value: 4.2602

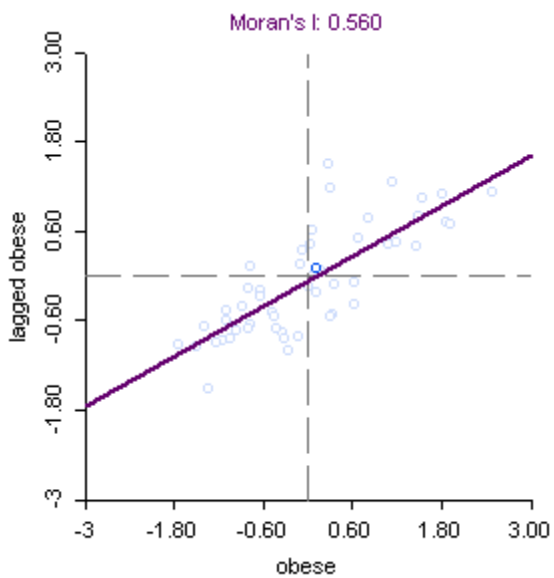

permutations: 99999  
pseudo p-value: 0.000010

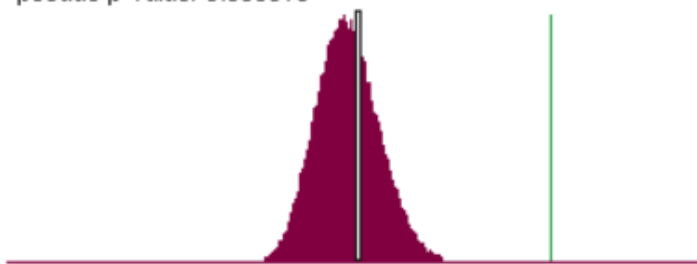

t: 0.5600 E[I]: -0.0196 mean: -0.0198 sd: 0.0918 z-value: 6.3149

**Supplementary 3: Win BUGS code for Bayesian space-time binomial model**

```

1
2
3
4
5 model
6 {
7     for( i in 1 : N ) {
8         for( j in 1 : T ) {
9             #Likelihood
10
11             stunted[i,j] ~ dbin(p1[i,j],child[i,j])
12             logit(p1[i,j])<-alpha1+phi1[i]+gamma1[j]+nu1[i,j]
13
14             thin[i,j] ~ dbin(p2[i,j],child[i,j])
15             logit(p2[i,j])<-alpha2+phi2[i]+gamma2[j]+nu2[i,j]
16             exceedance2[i,j]<-step(p2[i,j]-0.05) # reduce and maintain wasting to <5%
17
18             obese[i,j] ~ dbin(p3[i,j],child[i,j])
19             logit(p3[i,j])<-alpha3+phi3[i]+gamma3[j]+nu3[i,j]
20         }
21         exceedance1[i,5]<-step((1-p1[i,5]/p1[i,3])-0.17) #17% is target reduction by 2017 from 2012
22                                                     # assuming target 40% reduction by 2025
23         exceedance3[i,5]<-step(p3[i,5]/p3[i,3]-1) # no increase in obesity from 2012 to 2017
24     }
25
26 # - Space
27 phi1[1:52]~car.normal(adj[],weights[],num[],tau.phi[1])
28 phi2[1:52]~car.normal(adj[],weights[],num[],tau.phi[2])
29 phi3[1:52]~car.normal(adj[],weights[],num[],tau.phi[3])
30
31 for(k in 1:240) {weights[k]<-1}
32
33 # - Time:
34 gamma1[1:T]~car.normal(adj.t[],weights.t[],num.t[],tau.gamma[1])
35 gamma2[1:T]~car.normal(adj.t[],weights.t[],num.t[],tau.gamma[2])
36 gamma3[1:T]~car.normal(adj.t[],weights.t[],num.t[],tau.gamma[3])
37
38 for(t in 1:1) {
39     weights.t[t] <- 1;
40     adj.t[t] <- t+1;
41     num.t[t] <- 1
42 }
43 for(t in 2:(T-1)) {
44     weights.t[2+(t-2)*2] <- 1;
45     adj.t[2+(t-2)*2] <- t-1
46     weights.t[3+(t-2)*2] <- 1;
47     adj.t[3+(t-2)*2] <- t+1;
48     num.t[t] <- 2
49 }
50 for(t in T:T) {
51     weights.t[(T-2)*2 + 2] <- 1;
52     adj.t[(T-2)*2 + 2] <- t-1;
53     num.t[t] <- 1
54 }
55
56 #Space-time Interaction terms
57 for(i in 1:N){
58     for(j in 1:T){
59         nu1[i,j]~dnorm(0, tau.nu[1])
60         nu2[i,j]~dnorm(0, tau.nu[2])
61         nu3[i,j]~dnorm(0, tau.nu[3])

```



```
1
2
3     }
4 }
5
6 #Hyperprior specification
7
8 for(i in 1:3){
9   tau.phi[i]~dgamma(0.5, 0.0005)
10  tau.gamma[i]~dgamma(0.5, 0.0005)
11  tau.nu[i]~dgamma(0.5, 0.0005)
12 }
13
14 alpha1~dflat()
15 alpha2~dflat()
16 alpha3~dflat()
17 }
18 }
19
20
21
22
23
24
25
26
27
28
29
30
31
32
33
34
35
36
37
38
39
40
41
42
43
44
45
46
47
48
49
50
51
52
53
54
55
56
57
58
59
60
```

For peer review only

Supplementary 4: a) Model random effects posteriors and b) sensitivity analysis of hyper parameter

selection

a)

Spatial random effects ( $\phi_i$ )

Stunting

Thinness/wasting

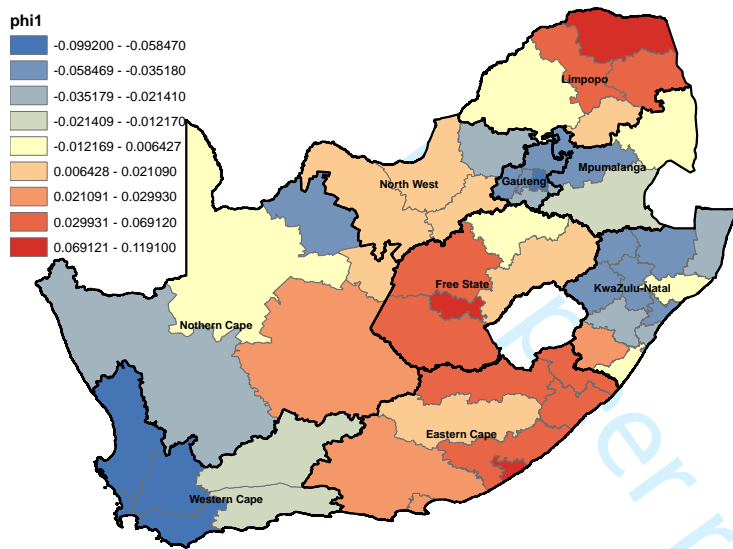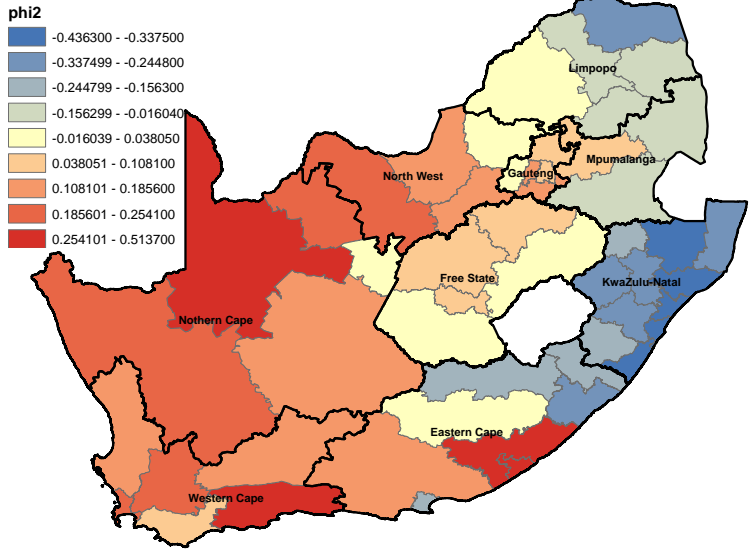

Obesity

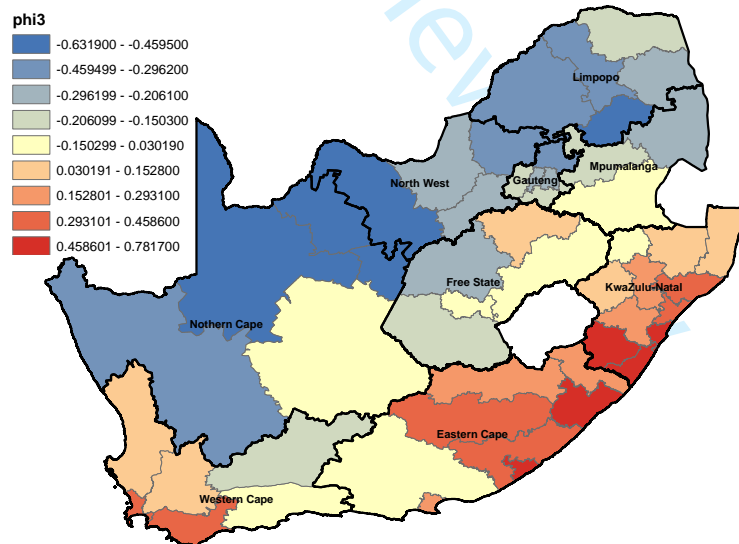

Unstructured effects (2017) (nu)

Stunting

Thinness/wasting

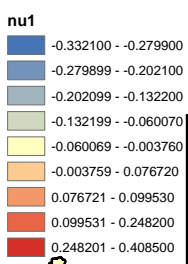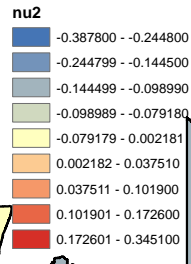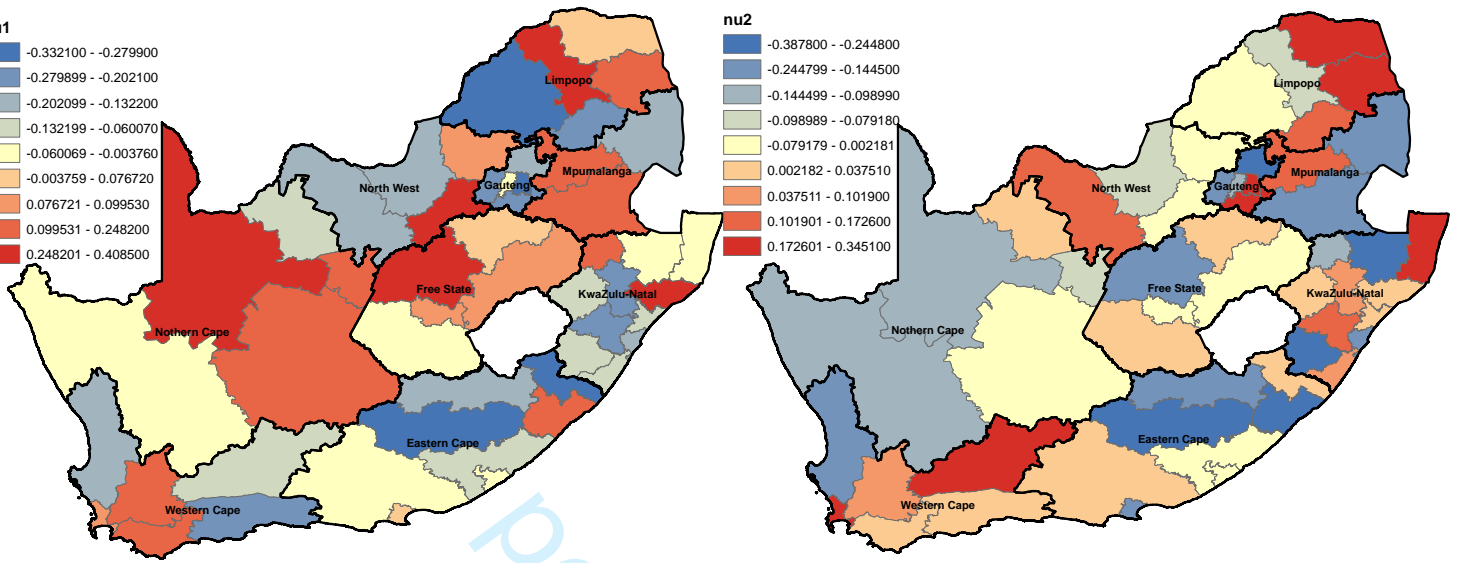

Obesity

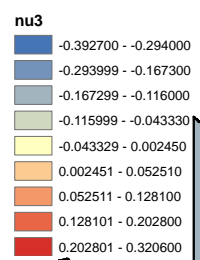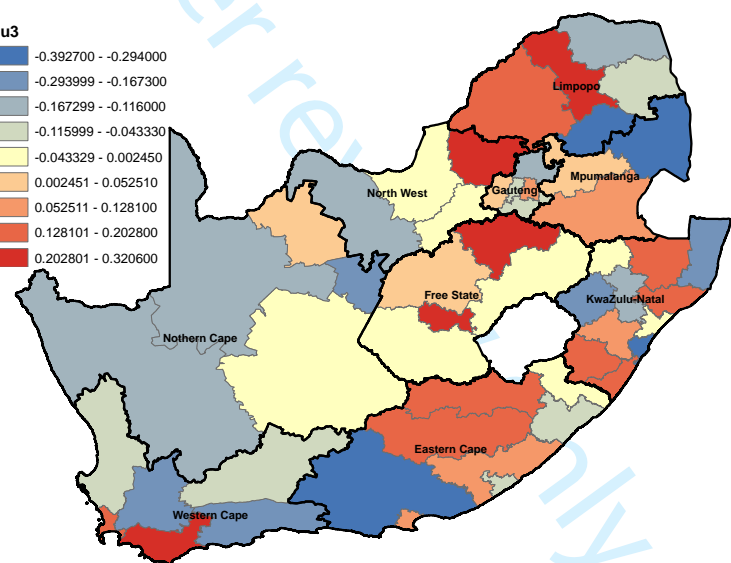

Temporal random effects (gamma)

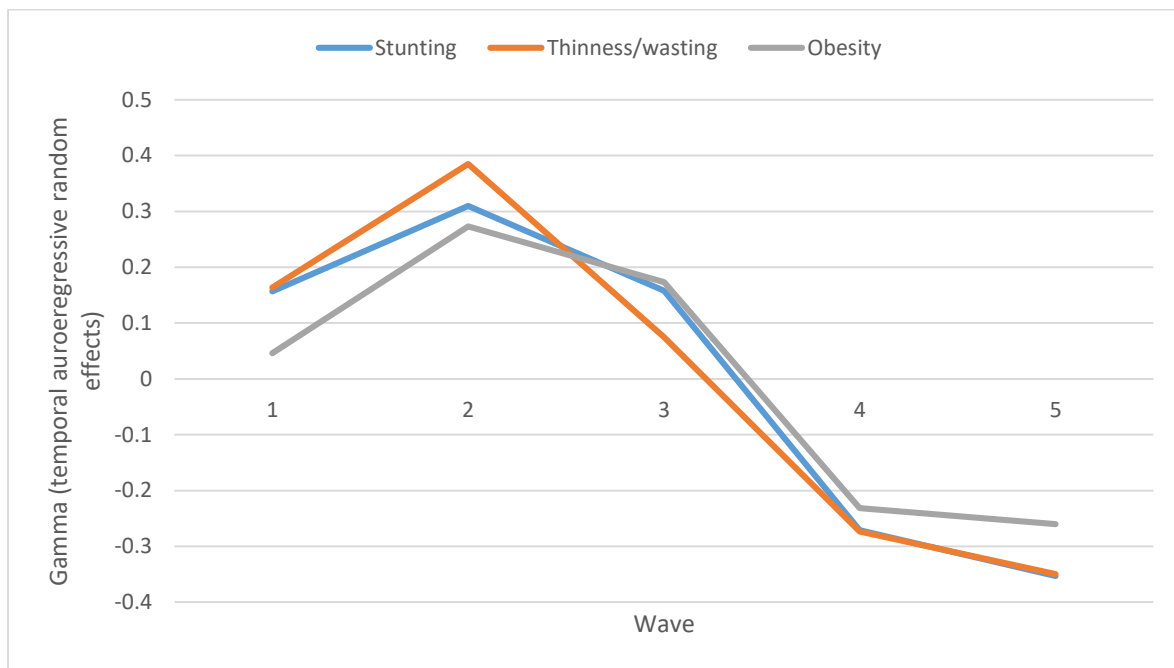

b)

We concluded an additional sensitivity analysis to confirm whether the choice of hyper parameter may have affected the prevalence estimates. For the variance parameters, namely  $\sigma_v^2$ ,  $\sigma_\phi^2$ ,  $\sigma_\gamma^2$  we assumed Gamma(0.5,0.0005) distributions as recommended by Wakefield (Wakefield J, Best N, Waller L. Bayesian approaches to disease mapping. *Spatial epidemiology: methods and applications* 2000:104-07.) for the Bayesian prevalence/exceedance probability estimates presented in the main text. We also tested whether changes to this prior may have affected the estimates. Other choices for this prior (Lawson A, Browne W, Vidal Rodeiro C. *Disease Mapping with WinBUGS and MLWin*. Chichester: John Wiley & Sons; 2003) that are commonly used include.

Gamma (0.001, 0.001)

Gamma (0.01,0.01)

Pairwise scatterplots of the posterior prevalence for the various gamma distribution choices for the hyper parameters below suggest that the model estimates were largely insensitive to the choice of distribution assumed:

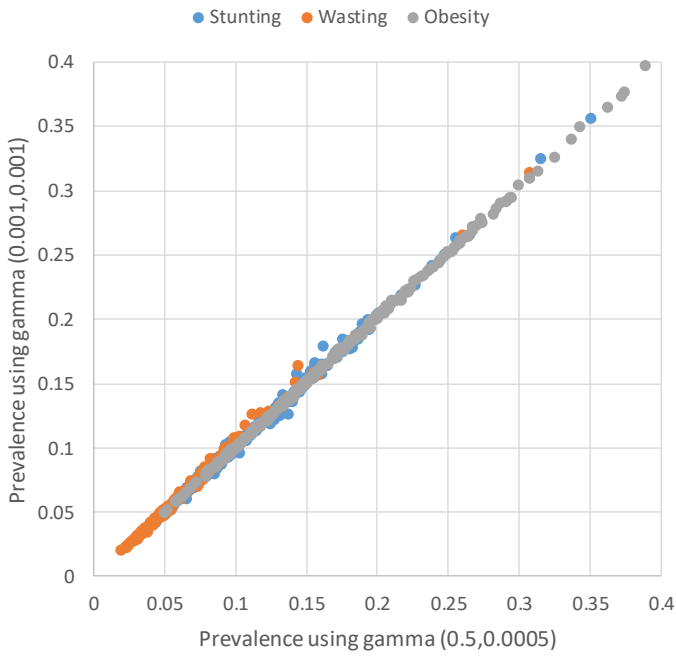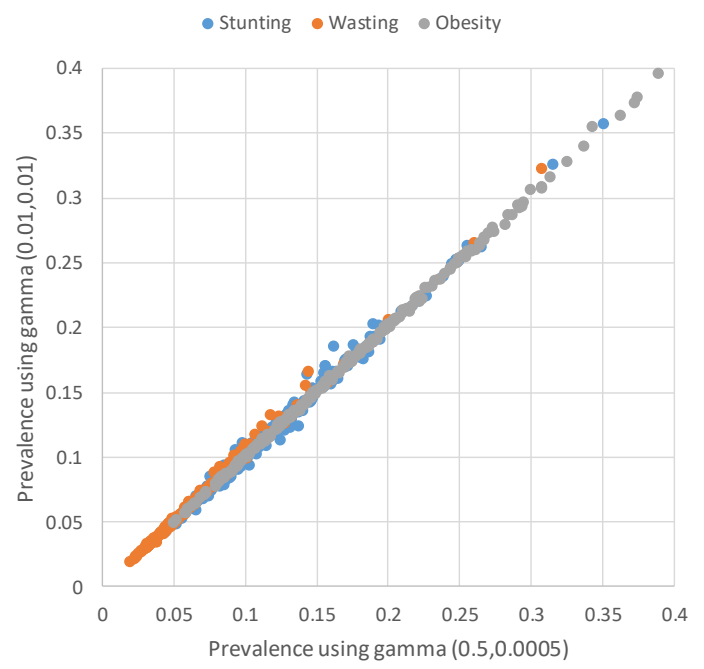

Peer review only

Supplementary 5: a) Model convergence [Gelman-Rubin statistics/plots]

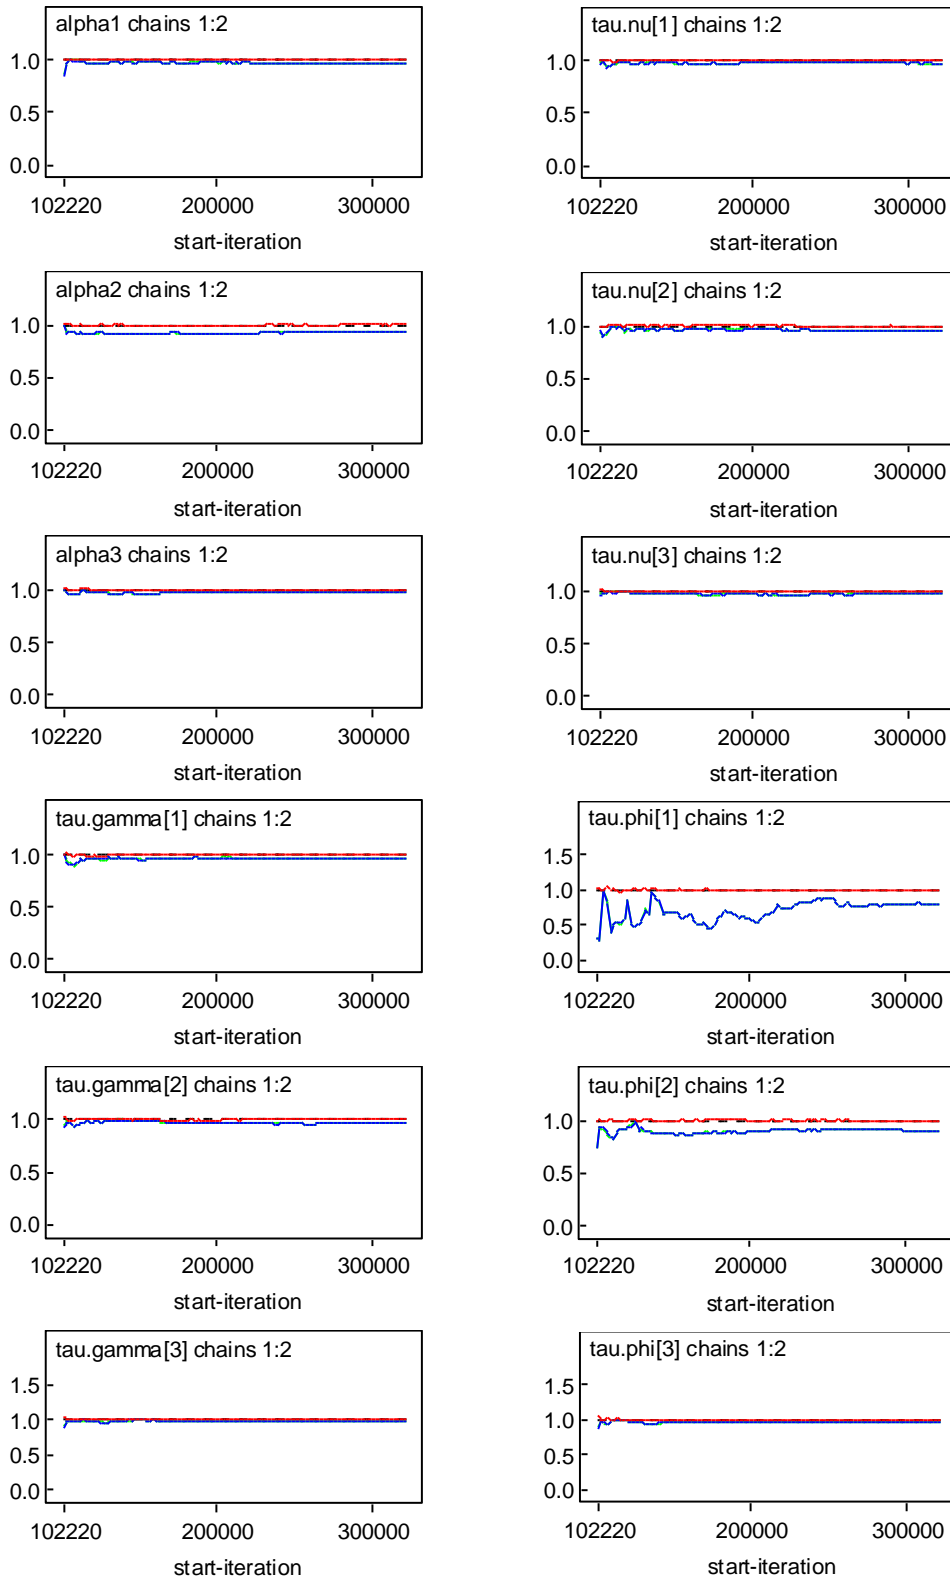

## Supplementary 6: Model fit and out of sample validation

### Overall model fit

**Dbar = post.mean of -2logL; Dhat = -2LogL at post.mean of stochastic nodes**

|         | Dbar     | Dhat     | pD      | DIC      |
|---------|----------|----------|---------|----------|
| obese   | 1110.400 | 969.250  | 141.149 | 1251.550 |
| stunted | 1036.090 | 910.101  | 125.987 | 1162.080 |
| thin    | 695.343  | 602.042  | 93.301  | 788.643  |
| total   | 2841.830 | 2481.390 | 360.437 | 3202.270 |

### Comparison of survey prevalence versus model fitted prevalence by anthropometric measure

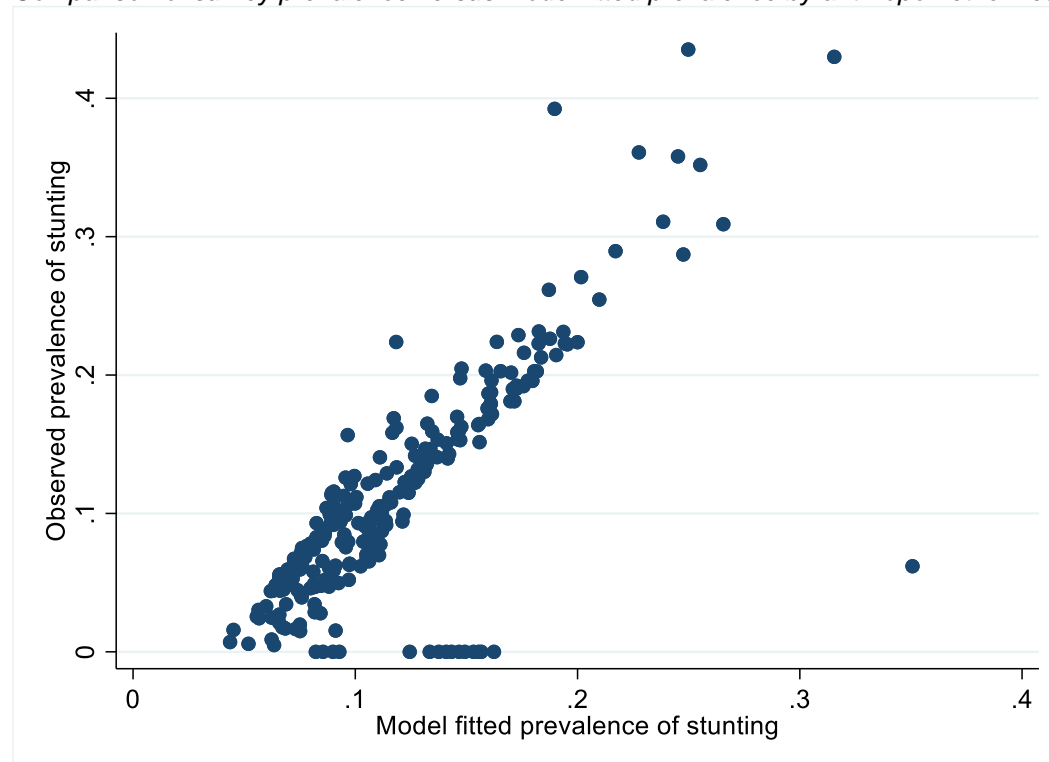

```
. spearman stunted_svy p1 if stunted_svy~=0
```

```
Number of obs =      241
Spearman's rho =      0.9190
```

```
Test of Ho: stunted_svy and p1 are independent
Prob > |t| =      0.0000
```

```
. spearman stunted_svy p1
```

```
Number of obs =      256
Spearman's rho =      0.7729
```

```
Test of Ho: stunted_svy and p1 are independent
Prob > |t| =      0.0000
```

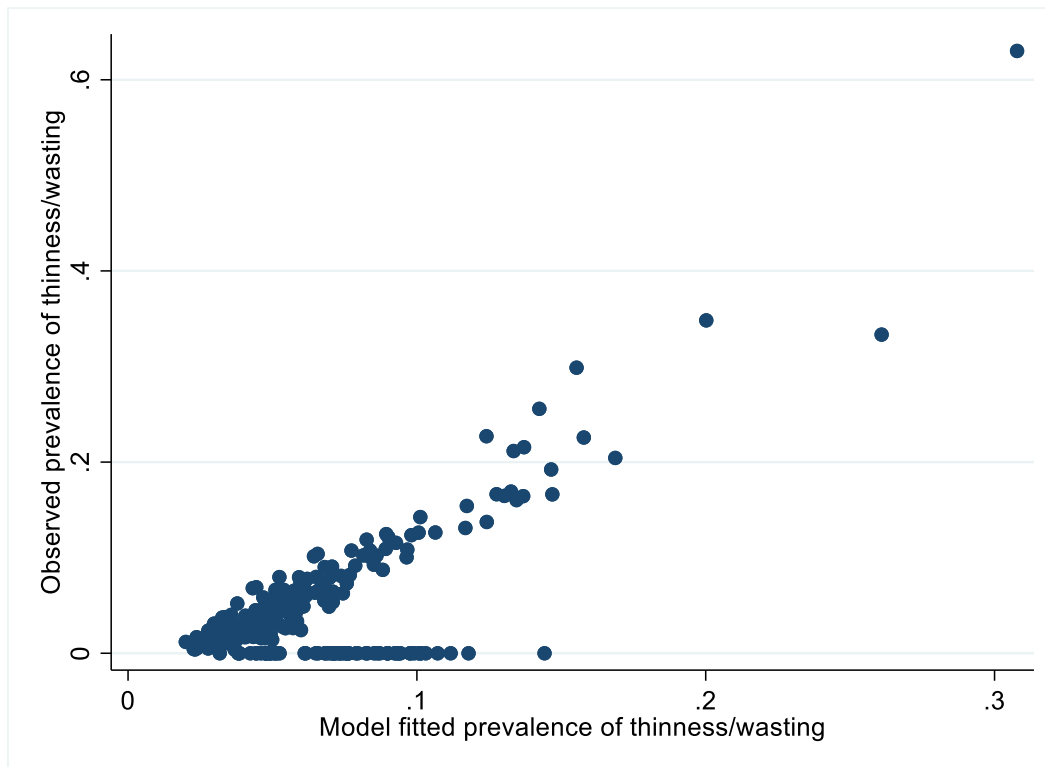

```
27  
28 . spearman thin_svy p2 if thin_svy~=0  
29  
30 Number of obs = 191  
31 Spearman's rho = 0.9019  
32 Test of Ho: thin_svy and p2 are independent  
33 Prob > |t| = 0.0000  
34  
35 . spearman thin_svy p2  
36  
37 Number of obs = 256  
38 Spearman's rho = 0.2972  
39 Test of Ho: thin_svy and p2 are independent  
40 Prob > |t| = 0.0000  
41  
42  
43  
44  
45  
46  
47  
48  
49  
50  
51  
52  
53  
54  
55  
56  
57  
58  
59  
60
```



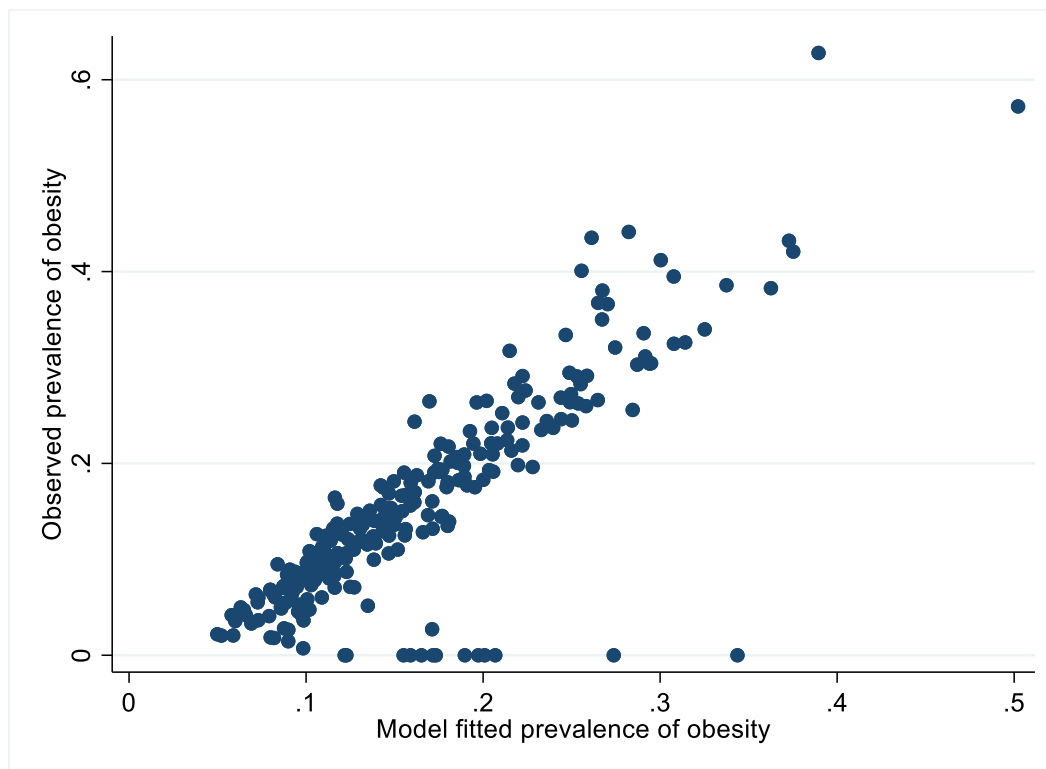

```

. spearman obese_svy p3 if obese_svy~=0

Number of obs =      243
Spearman's rho =      0.9485

Test of Ho: obese_svy and p3 are independent
Prob > |t| =          0.0000

. spearman obese_svy p3

Number of obs =      256
Spearman's rho =      0.8179

Test of Ho: obese_svy and p3 are independent
Prob > |t| =          0.0000
    
```

**Out of sample validation/prediction (10% random sample)**

Of the 37 out of sample validation points, 31 (or 84%) of the observed prevalence of stunting were within the 95% uncertainty interval for the predicted posterior prevalence, 28/37 (78%) for thinness/wasting and 31/37 (84%) for obesity.

| id | wave | District                   | Prov         | Stunted (observed) | Thin/wasted (observed) | Obese (observed) | Stunted (posterior) | 95% BCI |        | Thin/wasted (posterior) | 95% BCI |        | Obese (posterior) | 95% BCI |        |
|----|------|----------------------------|--------------|--------------------|------------------------|------------------|---------------------|---------|--------|-------------------------|---------|--------|-------------------|---------|--------|
| 48 | 4    | City of Tshwane (TSH)      | Gauteng      | 0.01584            | 0.028309               | 0.03565          | 0.09138             | 0.0344  | 0.1911 | 0.05339                 | 0.01411 | 0.1343 | 0.1104            | 0.04251 | 0.226  |
| 49 | 1    | City of Johannesburg (JHB) | Gauteng      | 0.075611           | 0.015782               | 0.187624         | 0.1285              | 0.05006 | 0.26   | 0.08426                 | 0.0217  | 0.2094 | 0.1389            | 0.05482 | 0.2789 |
| 50 | 1    | Buffalo City (BUF)         | Eastern Cape | 0.392359           | 0.255737               | 0.255737         | 0.1366              | 0.04961 | 0.2864 | 0.105                   | 0.02015 | 0.3356 | 0.3173            | 0.1231  | 0.5788 |
| 51 | 3    | Cacadu (DC10)              | Eastern Cape | 0.063566           | 0.063563               | 0.071285         | 0.1308              | 0.05085 | 0.261  | 0.07077                 | 0.01873 | 0.1759 | 0.1926            | 0.07914 | 0.3611 |
| 52 | 5    | Amathole (DC12)            | Eastern Cape | 0.034391           | 0.048998               | 0.263574         | 0.08987             | 0.03286 | 0.1895 | 0.0618                  | 0.01346 | 0.1731 | 0.1882            | 0.07342 | 0.363  |
| 53 | 1    | O.R.Tambo (DC15)           | Eastern Cape | 0.222196           | 0.015888               | 0.246151         | 0.138               | 0.05288 | 0.2758 | 0.06349                 | 0.01635 | 0.1665 | 0.2552            | 0.111   | 0.4522 |
| 54 | 3    | Xhariep (DC16)             | Free State   | 0.052021           | 0.022786               | 0.086915         | 0.1352              | 0.0517  | 0.2722 | 0.06617                 | 0.01758 | 0.1673 | 0.1631            | 0.06518 | 0.3172 |
| 55 | 4    | Lejweleputswa (DC18)       | Free State   | 0.164856           | 0.059159               | 0.08698          | 0.09708             | 0.0363  | 0.2027 | 0.0539                  | 0.01409 | 0.1363 | 0.1095            | 0.04191 | 0.2254 |
| 56 | 3    | Thabo Mofutsanyane (DC19)  | Free State   | 0.228885           | 0.030611               | 0.106143         | 0.1284              | 0.04956 | 0.2567 | 0.06452                 | 0.0173  | 0.1614 | 0.1861            | 0.07662 | 0.353  |

1  
2  
3  
4  
5  
6  
7  
8  
9  
10  
11  
12  
13  
14  
15  
16  
17  
18  
19  
20  
21  
22  
23  
24  
25  
26  
27  
28  
29  
30  
31  
32  
33  
34  
35  
36  
37  
38  
39  
40  
41  
42  
43  
44  
45  
46  
47  
48  
49  
50  
51  
52  
53  
54  
55  
56  
57  
58  
59  
60

|    |    |   |                                  |               |          |          |          |         |         |        |         |          |         |         |         |        |
|----|----|---|----------------------------------|---------------|----------|----------|----------|---------|---------|--------|---------|----------|---------|---------|---------|--------|
| 3  | 16 | 5 | Cape Winelands (DC2)             | Western Cape  | 0.125904 | 0.065507 | 0.089544 | 0.08173 | 0.02978 | 0.176  | 0.05496 | 0.01371  | 0.1417  | 0.1369  | 0.05382 | 0.2708 |
| 4  | 19 | 3 | UMgungundlovu (DC22)             | KwaZulu-Natal | 0.133616 | 0.107423 | 0.213388 | 0.1224  | 0.0468  | 0.2492 | 0.05064 | 0.01301  | 0.136   | 0.2251  | 0.0955  | 0.4095 |
| 5  | 20 | 3 | Uthukela (DC23)                  | KwaZulu-Natal | 0.140663 | 0.029259 | 0.244155 | 0.1202  | 0.04537 | 0.2464 | 0.05216 | 0.01372  | 0.1382  | 0.1857  | 0.07645 | 0.3524 |
| 6  | 21 | 5 | Umzinyathi (DC24)                | KwaZulu-Natal | 0.045311 | 0.037798 | 0.117828 | 0.08302 | 0.03081 | 0.1783 | 0.03554 | 0.008943 | 0.09847 | 0.1524  | 0.05855 | 0.3055 |
| 7  | 23 | 4 | Zululand (DC26)                  | KwaZulu-Natal | 0.082797 | 0.026059 | 0.193396 | 0.08843 | 0.03282 | 0.1885 | 0.03922 | 0.009809 | 0.1077  | 0.1404  | 0.0551  | 0.2804 |
| 8  | 25 | 3 | Uthungulu (DC28)                 | KwaZulu-Natal | 0.178442 | 0.022595 | 0.239129 | 0.1247  | 0.04783 | 0.251  | 0.0497  | 0.01282  | 0.1345  | 0.2337  | 0.09804 | 0.4257 |
| 9  | 26 | 3 | iLembe (DC29)                    | KwaZulu-Natal | 0.196082 | 0.045007 | 0.198271 | 0.1188  | 0.04489 | 0.2454 | 0.04939 | 0.01221  | 0.1343  | 0.2598  | 0.1132  | 0.4611 |
| 10 | 27 | 4 | Overberg (DC3)                   | Western Cape  | 0.044303 | 0.006543 | 0.22102  | 0.08827 | 0.03194 | 0.1892 | 0.05854 | 0.01459  | 0.1527  | 0.1828  | 0.07273 | 0.3521 |
| 11 | 28 | 1 | Gert Sibande (DC30)              | Mpumalanga    | 0.039364 | 0.016922 | 0.087611 | 0.1301  | 0.05057 | 0.2615 | 0.06794 | 0.0188   | 0.1708  | 0.1692  | 0.06952 | 0.3252 |
| 12 | 28 | 3 | Gert Sibande (DC30)              | Mpumalanga    | 0.13142  | 0.169157 | 0.242636 | 0.126   | 0.04846 | 0.252  | 0.05976 | 0.01619  | 0.1517  | 0.1798  | 0.07408 | 0.3441 |
| 13 | 30 | 2 | Ehlanzeni (DC32)                 | Mpumalanga    | 0.082747 | 0.049337 | 0.118953 | 0.1462  | 0.05729 | 0.2896 | 0.07806 | 0.02038  | 0.2002  | 0.1458  | 0.05572 | 0.2908 |
| 14 | 30 | 3 | Ehlanzeni (DC32)                 | Mpumalanga    | 0.308996 | 0.102135 | 0.263661 | 0.1244  | 0.04733 | 0.252  | 0.05775 | 0.01508  | 0.1496  | 0.1336  | 0.05113 | 0.2685 |
| 15 | 32 | 4 | Vhembe (DC34)                    | Limpopo       | 0.159305 | 0.005527 | 0.060438 | 0.1034  | 0.03696 | 0.2201 | 0.04615 | 0.01114  | 0.1254  | 0.127   | 0.04623 | 0.2623 |
| 16 | 33 | 4 | Capricorn (DC35)                 | Limpopo       | 0.098606 | 0.024444 | 0.137144 | 0.09882 | 0.0363  | 0.2066 | 0.05008 | 0.0131   | 0.1289  | 0.09301 | 0.0339  | 0.198  |
| 17 | 35 | 1 | Bojanala (DC37)                  | North West    | 0.061806 | 0.026407 | 0.041916 | 0.1308  | 0.05145 | 0.2631 | 0.07596 | 0.01993  | 0.1909  | 0.1472  | 0.05754 | 0.2922 |
| 18 | 35 | 3 | Bojanala (DC37)                  | North West    | 0.051943 | 0.050775 | 0.07316  | 0.127   | 0.0494  | 0.2549 | 0.06689 | 0.01764  | 0.1705  | 0.1567  | 0.06121 | 0.3078 |
| 19 | 36 | 4 | Ngaka Modiri Molema (DC38)       | North West    | 0.098734 | 0.085696 | 0.112994 | 0.09498 | 0.03531 | 0.1977 | 0.05315 | 0.01375  | 0.1366  | 0.1163  | 0.04431 | 0.2389 |
| 20 | 37 | 4 | Dr Ruth Segomotsi Mompati (DC39) | North West    | 0.074933 | 0.081794 | 0.020508 | 0.09534 | 0.03553 | 0.199  | 0.05775 | 0.01489  | 0.1462  | 0.09674 | 0.03614 | 0.2034 |
| 21 | 40 | 1 | Sedibeng (DC42)                  | Gauteng       | 0.202795 | 0.225723 | 0.106432 | 0.1281  | 0.04987 | 0.26   | 0.07473 | 0.02019  | 0.1852  | 0.1554  | 0.06286 | 0.3048 |
| 22 | 40 | 2 | Sedibeng (DC42)                  | Gauteng       | 0.152953 | 0.100409 | 0.132566 | 0.1455  | 0.05777 | 0.2879 | 0.08836 | 0.02332  | 0.2164  | 0.1801  | 0.07327 | 0.3438 |
| 23 | 41 | 4 | Sisonke (DC43)                   | KwaZulu-Natal | 0.058274 | 0.010655 | 0.058335 | 0.09652 | 0.03541 | 0.2031 | 0.04685 | 0.01187  | 0.123   | 0.2282  | 0.09509 | 0.4207 |
| 24 | 42 | 5 | Alfred Nzo (DC44)                | Eastern Cape  | 0.020967 | 0.040195 | 0.143771 | 0.09156 | 0.03377 | 0.1927 | 0.03907 | 0.009915 | 0.1059  | 0.1643  | 0.06519 | 0.3221 |
| 25 | 45 | 1 | West Rand (DC48)                 | Gauteng       | 0.085192 | 0.124663 | 0.07049  | 0.1293  | 0.05015 | 0.2589 | 0.07178 | 0.01918  | 0.1799  | 0.1645  | 0.06532 | 0.3235 |
| 26 | 46 | 5 | Central Karoo (DC5)              | Western Cape  | 0.059525 | 0.10142  | 0.080496 | 0.08649 | 0.0322  | 0.1821 | 0.05009 | 0.01282  | 0.1309  | 0.1124  | 0.04168 | 0.2323 |
| 27 | 47 | 1 | Ekurhuleni (EKU)                 | Gauteng       | 0.146754 | 0.026242 | 0.026557 | 0.1237  | 0.04661 | 0.2538 | 0.07674 | 0.02017  | 0.1912  | 0.1587  | 0.06215 | 0.3162 |
| 28 | 51 | 4 | Ekurhuleni (EKU)                 | Gauteng       | 0.007073 | 0.079849 | 0.08599  | 0.08755 | 0.03179 | 0.1863 | 0.05287 | 0.01372  | 0.1358  | 0.1248  | 0.0475  | 0.2561 |
| 29 | 52 | 4 | eThekwi (ETH)                    | KwaZulu-Natal | 0.141696 | 0.011844 | 0.311557 | 0.08787 | 0.03228 | 0.1884 | 0.03885 | 0.009519 | 0.1088  | 0.196   | 0.07941 | 0.3735 |
| 30 | 52 | 5 | eThekwi (ETH)                    | KwaZulu-Natal | 0.055993 | 0.016832 | 0.124759 | 0.08245 | 0.03015 | 0.1764 | 0.0343  | 0.008309 | 0.09693 | 0.1901  | 0.07589 | 0.3647 |

. spearman stunted\_svy stuntedvpost if validation\_sample2==1

Number of obs = 37  
Spearman's rho = 0.4445

Test of Ho: stunted\_svy and stuntedvpost are independent  
Prob > |t| = 0.0058

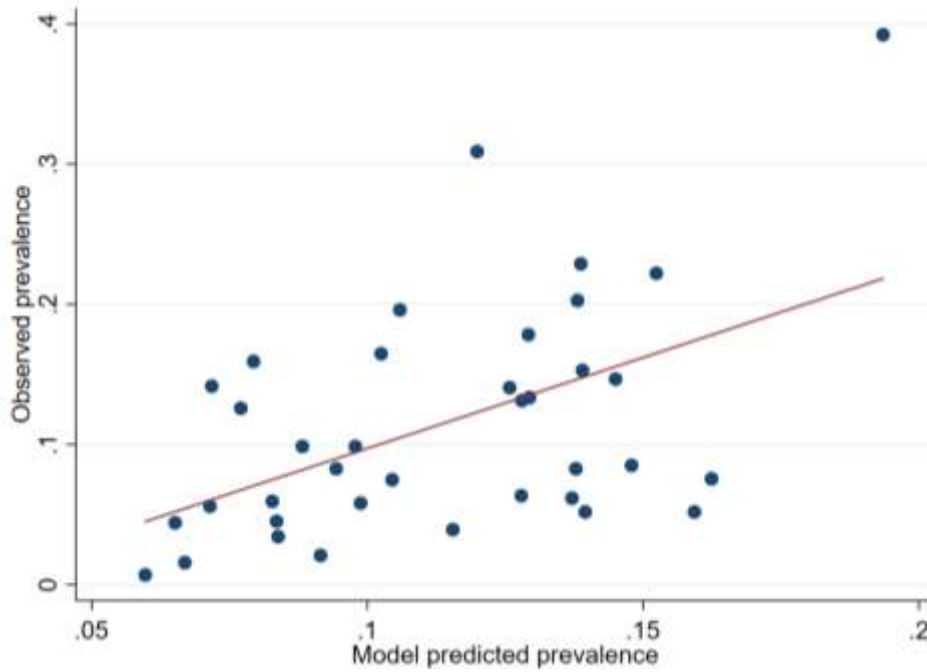

```
. spearman thin_svy thinvpost if validation_sample2==1
```

Number of obs = 37  
 Spearman's rho = 0.2048

Test of Ho: thin\_svy and thinvpost are independent  
 Prob > |t| = 0.2239

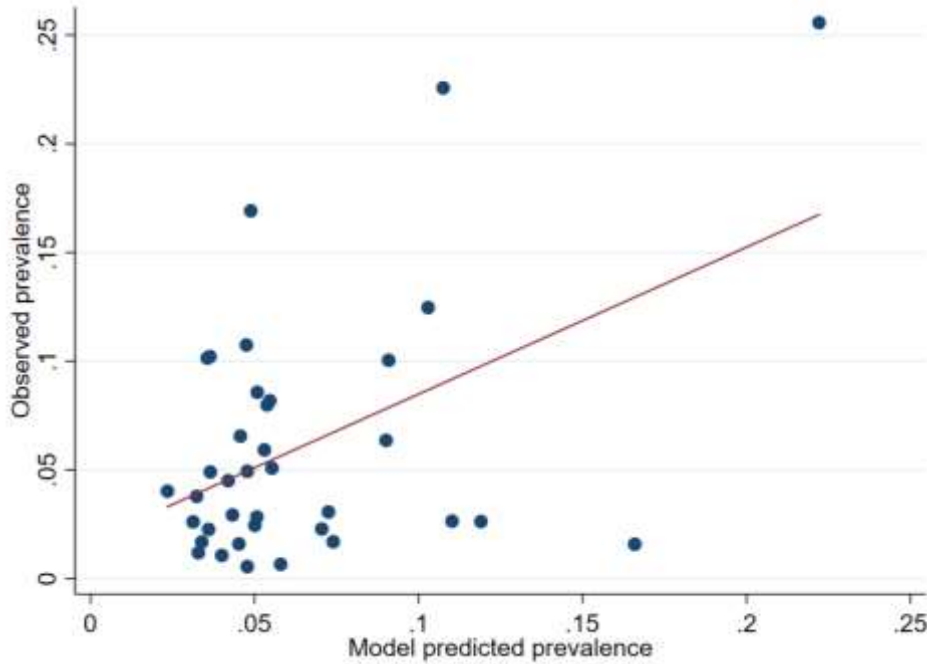

```
. spearman thin_svy thinvpost if validation_sample2==1 & thin_svy~0
```

Number of obs = 37  
 Spearman's rho = 0.2048

Test of Ho: thin\_svy and thinvpost are independent  
 Prob > |t| = 0.2239

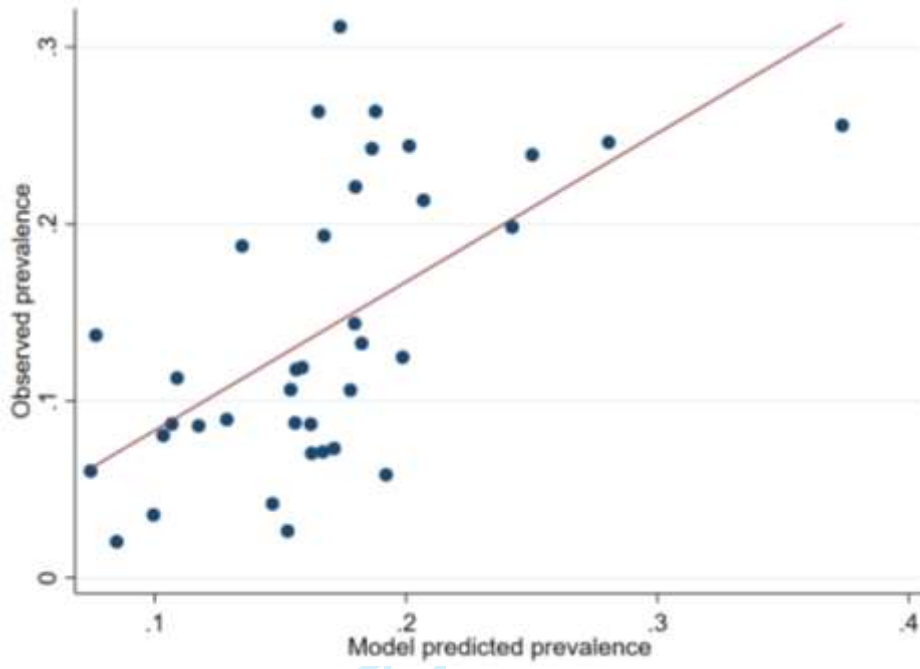

## Supplementary 7: Description of the study sample across survey rounds

| Survey wave    | Age (in years) | Sampled | Estimated population size using survey weights | 95% CI  |         | % sampled with height/weight measurement |
|----------------|----------------|---------|------------------------------------------------|---------|---------|------------------------------------------|
| <b>2008</b>    | 0              | 661     | 1092027                                        | 948199  | 1235854 | 35.9%                                    |
|                | 1              | 661     | 1151665                                        | 1009086 | 1294244 | 67.9%                                    |
|                | 2              | 670     | 1088458                                        | 960285  | 1216632 | 71.0%                                    |
|                | 3              | 642     | 1034244                                        | 902011  | 1166477 | 81.0%                                    |
|                | 4              | 620     | 1016227                                        | 882185  | 1150270 | 83.5%                                    |
|                | <5             | 3254    | 5382621                                        | 5005478 | 5759764 |                                          |
| <b>2010/11</b> | 0              | 517     | 866786                                         | 720440  | 1013132 | 16.2%                                    |
|                | 1              | 621     | 1032184                                        | 840129  | 1224239 | 42.5%                                    |
|                | 2              | 751     | 1225419                                        | 1040085 | 1410753 | 49.3%                                    |
|                | 3              | 840     | 1206389                                        | 1026681 | 1386097 | 53.3%                                    |
|                | 4              | 820     | 1196800                                        | 1031500 | 1362101 | 53.3%                                    |
|                | <5             | 3549    | 5527578                                        | 4914106 | 6141050 |                                          |
| <b>2012</b>    | 0              | 652     | 902357                                         | 777704  | 1027010 | 45.1%                                    |
|                | 1              | 691     | 1039354                                        | 887868  | 1190839 | 87.7%                                    |
|                | 2              | 764     | 1183609                                        | 995508  | 1371711 | 87.6%                                    |
|                | 3              | 826     | 1257820                                        | 1036042 | 1479598 | 89.6%                                    |
|                | 4              | 909     | 1405034                                        | 1191438 | 1618631 | 87.3%                                    |
|                | <5             | 3842    | 5788174                                        | 5112765 | 6463583 |                                          |
| <b>2014/15</b> | 0              | 886     | 1185863                                        | 1003941 | 1367786 | 50.3%                                    |
|                | 1              | 875     | 1162949                                        | 985828  | 1340070 | 92.9%                                    |
|                | 2              | 863     | 1060232                                        | 901257  | 1219207 | 92.7%                                    |
|                | 3              | 914     | 1160946                                        | 985127  | 1336765 | 94.0%                                    |
|                | 4              | 960     | 1298110                                        | 1098342 | 1497879 | 94.3%                                    |
|                | <5             | 4498    | 5868101                                        | 5200170 | 6536031 |                                          |
| <b>2017</b>    | 0              | 813     | 987763                                         | 841487  | 1134040 | 47.8%                                    |
|                | 1              | 909     | 1215360                                        | 1045099 | 1385622 | 86.4%                                    |
|                | 2              | 996     | 1293408                                        | 1105038 | 1481779 | 84.6%                                    |
|                | 3              | 992     | 1264427                                        | 1088783 | 1440071 | 88.9%                                    |
|                | 4              | 1000    | 1129184                                        | 973431  | 1284937 | 90.4%                                    |
|                | <5             | 4710    | 5890142                                        | 5261158 | 6519126 |                                          |

### Supplementary 8: Sensitivity analyses for missing weight and height

Summary: A comparison of missing weight/height proportions by various socio-demographic variables suggests that many were likely missing at random. Distributions of race, gender, household income, low birthweight, food security status, mother education category and father education category were not significantly different when comparing children with missing weight/height measurements to those with a valid weight/height measurement (please see analysis output below). However, age did significantly differ by missing status in that infants (<1 year of age) were significantly more likely to have a missing weight/height measurement compared to children aged 1-4 years. There also appeared to be significant differences in missing weight/height status by province of residence i.e. children in Mpumalanga, Western Cape for example had higher proportions of missing weight/height measurements among children under 5 ( $p < 0.001$ ). Furthermore, missing weight/height measurements for children were more significantly more likely among those children with younger mothers (<25 years of age).

```
. svy: tab race_missing_height_weight if race_~=0, row ci
(running tabulate on estimation sample)
```

```
Number of strata = 53          Number of obs = 16,649
Number of PSUs   = 1,076      Population size = 25,331,414
                                   Design df = 1,023
```

| race_    | missing_height_weight   |                         | Total |
|----------|-------------------------|-------------------------|-------|
|          | 0                       | 1                       |       |
| African  | .8129<br>[.8006, .8246] | .1871<br>[.1754, .1994] | 1     |
| Coloured | .7803<br>[.7437, .8129] | .2197<br>[.1871, .2563] | 1     |
| Asian/In | .7593<br>[.5708, .882]  | .2407<br>[.118, .4292]  | 1     |
| White    | .74<br>[.643, .8182]    | .26<br>[.1818, .357]    | 1     |
| Total    | .8066<br>[.7945, .8181] | .1934<br>[.1819, .2055] | 1     |

Key: row proportion  
[95% confidence interval for row proportion]

Pearson:  
Uncorrected chi2(3) = 32.5162  
Design-based F(2.49, 2551.53) = 1.7810 P = 0.1588

```
. svy: tab gender_missing_height_weight if race_~=0, row ci
(running tabulate on estimation sample)
```

```
Number of strata = 53          Number of obs = 19,138
Number of PSUs   = 1,218      Population size = 28,354,881
                                   Design df = 1,165
```

| gender_ | missing_height_weight   |                         | Total |
|---------|-------------------------|-------------------------|-------|
|         | 0                       | 1                       |       |
| Male    | .8065<br>[.7926, .8196] | .1935<br>[.1804, .2074] | 1     |
| Female  | .8102<br>[.7951, .8245] | .1898<br>[.1755, .2049] | 1     |
| Total   | .8083<br>[.7972, .819]  | .1917<br>[.181, .2028]  | 1     |

Key: row proportion  
[95% confidence interval for row proportion]

Pearson:  
Uncorrected chi2(1) = 0.4400  
Design-based F(1, 1165) = 0.1697 P = 0.6805

1  
2  
3 . svy: tab age\_missing\_height\_weight, row ci  
4 (running tabulate on estimation sample)

5 Number of strata = 53 Number of obs = 19,201  
6 Number of PSUs = 1,227 Population size = 28,456,616  
7 Design df = 1,174

| age_  | missing_height_weight   |                         | Total |
|-------|-------------------------|-------------------------|-------|
|       | 0                       | 1                       |       |
| 0     | .4596<br>[.4362, .4832] | .5404<br>[.5168, .5638] | 1     |
| 1     | .8581<br>[.8308, .8816] | .1419<br>[.1184, .1692] | 1     |
| 2     | .8764<br>[.8573, .8933] | .1236<br>[.1067, .1427] | 1     |
| 3     | .8952<br>[.8726, .9142] | .1048<br>[.0858, .1274] | 1     |
| 4     | .9015<br>[.8847, .916]  | .0985<br>[.084, .1153]  | 1     |
| Total | .8083<br>[.7972, .8189] | .1917<br>[.1811, .2028] | 1     |

25 Key: row proportion  
26 [95% confidence interval for row proportion]

27 Pearson:  
28 Uncorrected chi2(4) = 3267.7805  
29 Design-based F(3.41, 3999.27) = 238.9174 P = 0.0000

30 . svy: tab hh\_inc missing\_height\_weight, row ci  
31 (running tabulate on estimation sample)

32 Number of strata = 53 Number of obs = 18,289  
33 Number of PSUs = 1,195 Population size = 26,887,499  
34 Design df = 1,142

| hh_inc | missing_height_weight   |                         | Total |
|--------|-------------------------|-------------------------|-------|
|        | 0                       | 1                       |       |
| 1      | .8032<br>[.7792, .8251] | .1968<br>[.1749, .2208] | 1     |
| 2      | .8286<br>[.8012, .853]  | .1714<br>[.147, .1988]  | 1     |
| 3      | .8289<br>[.8084, .8475] | .1711<br>[.1525, .1916] | 1     |
| 4      | .8076<br>[.7751, .8365] | .1924<br>[.1635, .2249] | 1     |
| 5      | .7862<br>[.7578, .812]  | .2138<br>[.188, .2422]  | 1     |
| Total  | .8096<br>[.7982, .8205] | .1904<br>[.1795, .2018] | 1     |

52 Key: row proportion  
53 [95% confidence interval for row proportion]

54 Pearson:  
55 Uncorrected chi2(4) = 32.2620  
56 Design-based F(3.67, 4186.36) = 1.9756 P = 0.1017

57 . svy: tab province missing\_height\_weight, row ci  
58 (running tabulate on estimation sample)

59 Number of strata = 53 Number of obs = 19,201  
60 Number of PSUs = 1,227 Population size = 28,456,616

Design df = 1,174

```
-----
```

| province | missing_height_weight   |                         | Total |
|----------|-------------------------|-------------------------|-------|
|          | 0                       | 1                       |       |
| Eastern  | .8421<br>[.819, .8627]  | .1579<br>[.1373, .181]  | 1     |
| Free Sta | .833<br>[.7968, .8638]  | .167<br>[.1362, .2032]  | 1     |
| Gauteng  | .7866<br>[.7637, .8078] | .2134<br>[.1922, .2363] | 1     |
| KwaZulu- | .8448<br>[.8255, .8624] | .1552<br>[.1376, .1745] | 1     |
| Limpopo  | .8422<br>[.8184, .8634] | .1578<br>[.1366, .1816] | 1     |
| Mpumalan | .7557<br>[.7187, .7892] | .2443<br>[.2108, .2813] | 1     |
| North We | .8011<br>[.7725, .827]  | .1989<br>[.173, .2275]  | 1     |
| Northern | .7921<br>[.7674, .8149] | .2079<br>[.1851, .2326] | 1     |
| Western  | .7422<br>[.7064, .775]  | .2578<br>[.225, .2936]  | 1     |
| Total    | .8083<br>[.7972, .8189] | .1917<br>[.1811, .2028] | 1     |

```
-----
```

Key: row proportion  
[95% confidence interval for row proportion]

Pearson:  
Uncorrected chi2(8) = 171.9467  
Design-based F(6.89, 8090.45) = 9.8218 P = 0.0000

. svy: tab LBW missing\_height\_weight, row ci  
(running tabulate on estimation sample)

Number of strata = 53                      Number of obs = 16,606  
Number of PSUs = 1,128                    Population size = 24,829,511  
Design df = 1,075

```
-----
```

| LBW   | missing_height_weight   |                         | Total |
|-------|-------------------------|-------------------------|-------|
|       | 0                       | 1                       |       |
| 0     | .8164<br>[.8044, .8278] | .1836<br>[.1722, .1956] | 1     |
| 1     | .8106<br>[.7788, .8388] | .1894<br>[.1612, .2212] | 1     |
| Total | .8158<br>[.8045, .8266] | .1842<br>[.1734, .1955] | 1     |

```
-----
```

Key: row proportion  
[95% confidence interval for row proportion]

Pearson:  
Uncorrected chi2(1) = 0.3369  
Design-based F(1, 1075) = 0.1307 P = 0.7178

. svy: tab foodsecurity\_proxy missing\_height\_weight, row ci  
(running tabulate on estimation sample)

Number of strata = 53                      Number of obs = 5,017  
Number of PSUs = 438                      Population size = 8,843,019  
Design df = 385



```

-----
foodsecur |          missing_height_weight
ity_proxy |          0          1          Total
-----
1 |          .7719          .2281          1
  | [ .7467, .7952] [ .2048, .2533]
2 |          .8019          .1981          1
  | [ .7352, .8551] [ .1449, .2648]
3 |          .7596          .2404          1
  | [ .6983, .8119] [ .1881, .3017]
4 |          .8284          .1716          1
  | [ .7561, .8825] [ .1175, .2439]
5 |          .7869          .2131          1
  | [ .6923, .8583] [ .1417, .3077]
Total |          .7751          .2249          1
  | [ .753, .7959] [ .2041, .247]
-----

```

Key: row proportion  
[95% confidence interval for row proportion]

Pearson:

Uncorrected chi2(4) = 6.4682  
Design-based F(3.04, 1168.67) = 0.8267 P = 0.4803

. svy: tab mthagegrp missing\_height\_weight, row ci  
(running tabulate on estimation sample)

Number of strata = 53                      Number of obs = 17,335  
Number of PSUs = 1,192                    Population size = 26,432,345  
Design df = 1,139

```

-----
RECODE of |          missing_height_weight
mth_age_f |          0          1          Total
inal      |-----
1 |          .6691          .3309          1
  | [ .628, .7077] [ .2923, .372]
2 |          .7787          .2213          1
  | [ .7553, .8004] [ .1996, .2447]
3 |          .8128          .1872          1
  | [ .7961, .8285] [ .1715, .2039]
4 |          .8329          .1671          1
  | [ .8096, .8539] [ .1461, .1904]
5 |          .8629          .1371          1
  | [ .7939, .9113] [ .0887, .2061]
Total |          .8006          .1994          1
  | [ .7894, .8115] [ .1885, .2106]
-----

```

Key: row proportion  
[95% confidence interval for row proportion]

Pearson:

Uncorrected chi2(4) = 169.4906  
Design-based F(3.89, 4436.22) = 15.6564 P = 0.0000

. svy: tab mth\_edu2 missing\_height\_weight, row ci  
(running tabulate on estimation sample)

Number of strata = 53                      Number of obs = 16,352  
Number of PSUs = 1,169                    Population size = 25,254,660  
Design df = 1,116

```

-----
mth_edu2 |          missing_height_weight
          |          0          1          Total
-----

```



**Supplementary 9: Full posterior prevalence estimates with 95% Bayesian uncertainty intervals (UIs) by district and year. Also includes exceedance probabilities for 17% reduction in stunting from wave 3 (2012) to wave 5 (2017) - to achieve 40% reduction from 2012 to 2025, 5% target threshold for wasting prevalence and no increase in obesity from wave 3 (2012) to wave 5 (2017) as per 2025 nutritional targets.**

| Province      | District                         | wave | stunting | 95% UI |       | Exceedance probability 17% reduction from wave 3 to 5 | thinness | 95% UI |       | Exceedance probability 5% target threshold | obesity | 95% UI |       | Exceedance probability - no increase from wave 3 to 5 |
|---------------|----------------------------------|------|----------|--------|-------|-------------------------------------------------------|----------|--------|-------|--------------------------------------------|---------|--------|-------|-------------------------------------------------------|
| Eastern Cape  | Alfred Nzo(DC44 )                | 1    | 9.2%     | 4.4%   | 16.1% | N/A                                                   | 6.1%     | 2.3%   | 12.1% | 0.6223                                     | 16.9%   | 9.3%   | 26.2% | N/A                                                   |
| KwaZulu-Natal | Amajuba(DC25 )                   | 1    | 9.7%     | 5.1%   | 15.7% | N/A                                                   | 5.1%     | 2.1%   | 9.8%  | 0.4572                                     | 16.1%   | 9.8%   | 24.0% | N/A                                                   |
| Eastern Cape  | Amathole(DC12 )                  | 1    | 14.8%    | 6.4%   | 27.4% | N/A                                                   | 12.4%    | 3.9%   | 26.8% | 0.9399                                     | 28.2%   | 14.4%  | 46.2% | N/A                                                   |
| North West    | Bojanala(DC37 )                  | 1    | 10.2%    | 4.6%   | 18.4% | N/A                                                   | 5.7%     | 1.9%   | 12.3% | 0.5349                                     | 9.7%    | 4.3%   | 17.7% | N/A                                                   |
| Eastern Cape  | Buffalo City(BUF )               | 1    | 19.0%    | 8.3%   | 35.1% | N/A                                                   | 14.2%    | 4.0%   | 33.4% | 0.9435                                     | 28.5%   | 13.0%  | 48.8% | N/A                                                   |
| Eastern Cape  | Cacadu(DC10 )                    | 1    | 21.7%    | 12.9%  | 32.5% | N/A                                                   | 8.0%     | 2.2%   | 19.8% | 0.7199                                     | 18.2%   | 10.3%  | 28.0% | N/A                                                   |
| Western Cape  | Cape Winelands(DC2 )             | 1    | 12.5%    | 4.7%   | 25.8% | N/A                                                   | 9.7%     | 4.4%   | 17.1% | 0.9475                                     | 18.7%   | 10.8%  | 28.3% | N/A                                                   |
| Limpopo       | Capricorn(DC35 )                 | 1    | 12.4%    | 6.5%   | 20.6% | N/A                                                   | 10.1%    | 4.6%   | 18.2% | 0.9578                                     | 12.2%   | 4.6%   | 25.1% | N/A                                                   |
| Western Cape  | Central Karoo(DC5 )              | 1    | 16.0%    | 9.0%   | 24.9% | N/A                                                   | 7.6%     | 3.2%   | 14.3% | 0.8194                                     | 13.9%   | 7.6%   | 22.2% | N/A                                                   |
| Eastern Cape  | Chris Hani(DC13 )                | 1    | 9.7%     | 4.7%   | 17.0% | N/A                                                   | 7.4%     | 2.1%   | 18.3% | 0.6688                                     | 27.5%   | 17.5%  | 38.9% | N/A                                                   |
| Western Cape  | City of Cape Town(CPT )          | 1    | 8.1%     | 4.0%   | 13.8% | N/A                                                   | 9.0%     | 2.4%   | 21.6% | 0.7817                                     | 15.6%   | 8.9%   | 24.0% | N/A                                                   |
| Gauteng       | City of Johannesburg(JHB )       | 1    | 9.6%     | 4.8%   | 15.9% | N/A                                                   | 4.6%     | 1.6%   | 9.4%  | 0.3591                                     | 16.3%   | 9.5%   | 24.7% | N/A                                                   |
| Gauteng       | City of Tshwane(TSH )            | 1    | 18.3%    | 11.1%  | 27.2% | N/A                                                   | 12.8%    | 6.5%   | 20.8% | 0.9967                                     | 9.5%    | 4.9%   | 15.8% | N/A                                                   |
| North West    | Dr Kenneth Kaunda(DC40 )         | 1    | 13.4%    | 6.5%   | 23.0% | N/A                                                   | 13.4%    | 5.8%   | 24.4% | 0.9898                                     | 14.7%   | 7.2%   | 25.0% | N/A                                                   |
| North West    | Dr Ruth Segomotsi Mompati(DC39 ) | 1    | 11.2%    | 6.4%   | 17.5% | N/A                                                   | 13.5%    | 7.5%   | 20.9% | 0.9997                                     | 10.0%   | 5.5%   | 15.9% | N/A                                                   |
| Western Cape  | Eden(DC4 )                       | 1    | 13.7%    | 6.8%   | 23.5% | N/A                                                   | 9.8%     | 2.5%   | 25.0% | 0.81                                       | 21.8%   | 12.0%  | 34.2% | N/A                                                   |
| Mpumalanga    | Ehlanzeni(DC32 )                 | 1    | 10.7%    | 5.7%   | 17.3% | N/A                                                   | 4.0%     | 1.5%   | 8.0%  | 0.2425                                     | 8.9%    | 4.6%   | 14.9% | N/A                                                   |
| Gauteng       | Ekurhuleni(EKU )                 | 1    | 13.2%    | 6.5%   | 22.0% | N/A                                                   | 5.5%     | 1.9%   | 11.3% | 0.5078                                     | 9.0%    | 4.0%   | 16.2% | N/A                                                   |
| Free State    | Fezile Dabi(DC20 )               | 1    | 12.7%    | 5.8%   | 23.0% | N/A                                                   | 7.6%     | 2.0%   | 19.2% | 0.692                                      | 25.6%   | 13.8%  | 40.1% | N/A                                                   |
| Northern Cape | Frances Baard(DC9 )              | 1    | 13.2%    | 7.4%   | 20.7% | N/A                                                   | 5.6%     | 2.3%   | 10.6% | 0.5542                                     | 8.9%    | 4.5%   | 15.1% | N/A                                                   |
| Mpumalanga    | Gert Sibande(DC30 )              | 1    | 7.6%     | 3.8%   | 13.0% | N/A                                                   | 4.1%     | 1.5%   | 8.2%  | 0.2558                                     | 11.5%   | 6.4%   | 18.1% | N/A                                                   |
| Limpopo       | Greater Sekhukhune(DC47 )        | 1    | 14.6%    | 8.1%   | 22.9% | N/A                                                   | 7.9%     | 3.5%   | 14.3% | 0.8598                                     | 7.3%    | 3.4%   | 12.9% | N/A                                                   |
| Eastern Cape  | Joe Gqabi(DC14 )                 | 1    | 12.8%    | 6.8%   | 21.0% | N/A                                                   | 4.6%     | 1.7%   | 9.6%  | 0.3627                                     | 18.6%   | 10.9%  | 28.4% | N/A                                                   |
| Northern Cape | John Taolo Gaetsewe(DC45 )       | 1    | 8.4%     | 3.7%   | 15.3% | N/A                                                   | 6.0%     | 2.1%   | 12.5% | 0.5885                                     | 11.5%   | 5.6%   | 20.0% | N/A                                                   |
| Free State    | Lejweleputswa(DC18 )             | 1    | 11.1%    | 5.0%   | 19.7% | N/A                                                   | 7.0%     | 2.5%   | 14.6% | 0.714                                      | 9.9%    | 4.4%   | 17.8% | N/A                                                   |
| Free State    | Mangaung(MAN )                   | 1    | 35.1%    | 21.0%  | 51.4% | N/A                                                   | 7.6%     | 2.0%   | 19.6% | 0.6713                                     | 16.5%   | 6.3%   | 33.5% | N/A                                                   |
| Limpopo       | Mopani(DC33 )                    | 1    | 8.2%     | 3.8%   | 14.5% | N/A                                                   | 5.6%     | 2.1%   | 11.2% | 0.5388                                     | 9.6%    | 4.7%   | 16.6% | N/A                                                   |
| Northern Cape | Namakwa(DC6 )                    | 1    | 14.6%    | 7.6%   | 24.1% | N/A                                                   | 7.4%     | 2.8%   | 14.6% | 0.7848                                     | 10.5%   | 4.9%   | 18.1% | N/A                                                   |
| Eastern Cape  | Nelson Mandela Bay(NMA )         | 1    | 11.2%    | 5.6%   | 18.9% | N/A                                                   | 5.5%     | 2.0%   | 11.2% | 0.5236                                     | 25.3%   | 15.5%  | 37.0% | N/A                                                   |
| North West    | Ngaka Modiri Molema(DC38 )       | 1    | 11.1%    | 5.8%   | 18.2% | N/A                                                   | 5.7%     | 2.2%   | 11.0% | 0.5684                                     | 18.1%   | 10.6%  | 27.3% | N/A                                                   |
| Mpumalanga    | Nkangala(DC31 )                  | 1    | 13.3%    | 7.3%   | 21.1% | N/A                                                   | 11.7%    | 5.7%   | 20.0% | 0.9902                                     | 15.4%   | 8.6%   | 23.7% | N/A                                                   |
| Eastern Cape  | O.R.Tambo(DC15 )                 | 1    | 19.5%    | 12.6%  | 27.8% | N/A                                                   | 3.5%     | 1.3%   | 7.0%  | 0.1417                                     | 24.4%   | 16.5%  | 33.4% | N/A                                                   |
| Western Cape  | Overberg(DC3 )                   | 1    | 11.5%    | 5.8%   | 19.4% | N/A                                                   | 5.4%     | 1.9%   | 10.9% | 0.4959                                     | 17.7%   | 9.9%   | 27.8% | N/A                                                   |
| Northern Cape | Pixley ka Seme(DC7 )             | 1    | 25.0%    | 13.7%  | 39.7% | N/A                                                   | 8.3%     | 2.3%   | 20.3% | 0.7481                                     | 26.1%   | 14.7%  | 40.7% | N/A                                                   |
| Gauteng       | Sedibeng(DC42 )                  | 1    | 16.5%    | 9.2%   | 26.2% | N/A                                                   | 15.8%    | 7.9%   | 26.3% | 0.9993                                     | 12.3%   | 6.4%   | 20.3% | N/A                                                   |
| KwaZulu-Natal | Sisonke(DC43 )                   | 1    | 18.4%    | 11.3%  | 26.9% | N/A                                                   | 8.1%     | 3.8%   | 14.5% | 0.894                                      | 20.6%   | 13.1%  | 29.4% | N/A                                                   |
| Northern Cape | Siyanda(DC8 )                    | 1    | 13.3%    | 7.2%   | 21.2% | N/A                                                   | 7.0%     | 2.7%   | 13.3% | 0.7479                                     | 9.1%    | 4.4%   | 15.6% | N/A                                                   |
| Free State    | Thabo Mofutsanyane(DC19 )        | 1    | 12.8%    | 6.2%   | 22.1% | N/A                                                   | 7.2%     | 2.0%   | 18.0% | 0.653                                      | 17.5%   | 9.1%   | 28.2% | N/A                                                   |
| KwaZulu-Natal | UMgungundlovu(DC22 )             | 1    | 8.5%     | 4.1%   | 14.5% | N/A                                                   | 4.5%     | 1.6%   | 9.1%  | 0.3328                                     | 20.5%   | 12.6%  | 30.2% | N/A                                                   |
| KwaZulu-Natal | Ugu(DC21 )                       | 1    | 8.1%     | 4.4%   | 13.1% | N/A                                                   | 2.9%     | 1.1%   | 5.8%  | 0.0602                                     | 19.1%   | 12.6%  | 26.7% | N/A                                                   |

1  
2

|    |               |                                  |   |       |       |       |     |       |       |       |        |       |       |       |     |
|----|---------------|----------------------------------|---|-------|-------|-------|-----|-------|-------|-------|--------|-------|-------|-------|-----|
| 3  | KwaZulu-Natal | Umkhanyakude(DC27 )              | 1 | 11.2% | 5.6%  | 18.9% | N/A | 8.3%  | 3.5%  | 15.9% | 0.8631 | 13.8% | 7.2%  | 22.5% | N/A |
| 4  | KwaZulu-Natal | Umzinyathi(DC24 )                | 1 | 12.8% | 4.9%  | 26.1% | N/A | 5.5%  | 1.4%  | 14.4% | 0.4431 | 19.0% | 7.7%  | 36.5% | N/A |
| 5  | KwaZulu-Natal | Uthukela(DC23 )                  | 1 | 5.6%  | 3.0%  | 9.1%  | N/A | 4.2%  | 2.0%  | 7.5%  | 0.2652 | 10.7% | 6.7%  | 15.5% | N/A |
| 6  | KwaZulu-Natal | Uthungulu(DC28 )                 | 1 | 11.4% | 6.4%  | 17.8% | N/A | 3.2%  | 1.2%  | 6.6%  | 0.1071 | 19.0% | 12.0% | 27.4% | N/A |
| 8  | Limpopo       | Vhembe(DC34 )                    | 1 | 25.5% | 15.4% | 38.0% | N/A | 4.5%  | 1.5%  | 9.9%  | 0.3466 | 20.2% | 11.3% | 31.3% | N/A |
| 9  | Limpopo       | Waterberg(DC36 )                 | 1 | 12.0% | 6.3%  | 19.6% | N/A | 6.5%  | 2.7%  | 12.2% | 0.6979 | 12.1% | 6.4%  | 19.5% | N/A |
| 10 | Western Cape  | West Coast(DC1 )                 | 1 | 10.4% | 4.6%  | 18.7% | N/A | 8.5%  | 2.3%  | 21.0% | 0.7495 | 26.7% | 15.6% | 40.5% | N/A |
| 11 | Gauteng       | West Rand(DC48 )                 | 1 | 11.0% | 5.0%  | 19.9% | N/A | 8.9%  | 3.4%  | 18.0% | 0.8797 | 11.6% | 5.3%  | 20.5% | N/A |
| 13 | Free State    | Xhariep(DC16 )                   | 1 | 20.2% | 11.3% | 31.3% | N/A | 7.1%  | 2.0%  | 17.3% | 0.6479 | 10.2% | 4.8%  | 18.0% | N/A |
| 14 | KwaZulu-Natal | Zululand(DC26 )                  | 1 | 8.2%  | 4.0%  | 14.0% | N/A | 3.6%  | 1.3%  | 7.5%  | 0.1747 | 13.9% | 7.9%  | 21.8% | N/A |
| 15 | KwaZulu-Natal | eThekweni(ETH )                  | 1 | 8.1%  | 4.1%  | 13.7% | N/A | 3.5%  | 1.3%  | 7.2%  | 0.15   | 19.5% | 12.3% | 28.5% | N/A |
| 16 | KwaZulu-Natal | iLembe(DC29 )                    | 1 | 10.7% | 5.7%  | 17.4% | N/A | 5.1%  | 1.3%  | 13.2% | 0.4016 | 37.3% | 27.2% | 48.2% | N/A |
| 17 | Eastern Cape  | Alfred Nzo(DC44 )                | 2 | 16.2% | 8.8%  | 25.8% | N/A | 7.3%  | 1.9%  | 18.1% | 0.659  | 18.0% | 10.0% | 28.0% | N/A |
| 18 | KwaZulu-Natal | Amajuba(DC25 )                   | 2 | 7.6%  | 4.0%  | 12.5% | N/A | 6.6%  | 3.1%  | 11.6% | 0.7634 | 11.6% | 6.7%  | 17.7% | N/A |
| 20 | Eastern Cape  | Amathole(DC12 )                  | 2 | 15.6% | 5.8%  | 31.2% | N/A | 30.8% | 14.7% | 51.8% | 1      | 27.4% | 11.7% | 48.8% | N/A |
| 21 | North West    | Bojanala(DC37 )                  | 2 | 10.8% | 5.4%  | 18.4% | N/A | 9.0%  | 2.4%  | 22.1% | 0.7872 | 15.6% | 8.6%  | 24.9% | N/A |
| 22 | Eastern Cape  | Buffalo City(BUF )               | 2 | 16.2% | 6.0%  | 33.4% | N/A | 14.4% | 3.0%  | 40.0% | 0.8966 | 34.4% | 14.5% | 60.0% | N/A |
| 23 | Eastern Cape  | Cacadu(DC10 )                    | 2 | 17.3% | 9.9%  | 26.7% | N/A | 9.8%  | 2.7%  | 24.0% | 0.8257 | 9.8%  | 4.7%  | 16.9% | N/A |
| 24 | Western Cape  | Cape Winelands(DC2 )             | 2 | 10.7% | 5.5%  | 17.7% | N/A | 16.9% | 9.5%  | 26.4% | 0.9999 | 24.4% | 15.6% | 34.5% | N/A |
| 25 | Limpopo       | Capricorn(DC35 )                 | 2 | 17.8% | 10.2% | 27.3% | N/A | 8.5%  | 3.8%  | 15.5% | 0.8982 | 8.8%  | 4.1%  | 15.5% | N/A |
| 27 | Western Cape  | Central Karoo(DC5 )              | 2 | 11.2% | 5.7%  | 18.5% | N/A | 10.1% | 2.7%  | 24.5% | 0.842  | 17.2% | 6.6%  | 33.5% | N/A |
| 28 | Eastern Cape  | Chris Hani(DC13 )                | 2 | 10.9% | 5.7%  | 17.9% | N/A | 9.0%  | 2.4%  | 22.0% | 0.7881 | 24.0% | 15.3% | 34.0% | N/A |
| 29 | Western Cape  | City of Cape Town(CPT )          | 2 | 18.1% | 11.2% | 26.3% | N/A | 14.7% | 8.3%  | 22.7% | 0.9998 | 37.5% | 27.7% | 48.0% | N/A |
| 30 | Gauteng       | City of Johannesburg(JHB )       | 2 | 15.6% | 9.5%  | 23.2% | N/A | 9.9%  | 2.7%  | 24.2% | 0.8305 | 14.9% | 8.9%  | 22.3% | N/A |
| 32 | Gauteng       | City of Tshwane(TSH )            | 2 | 17.3% | 10.7% | 25.4% | N/A | 9.2%  | 2.5%  | 22.2% | 0.8056 | 19.5% | 12.3% | 28.0% | N/A |
| 33 | North West    | Dr Kenneth Kaunda(DC40 )         | 2 | 24.5% | 13.9% | 37.9% | N/A | 10.1% | 2.7%  | 24.2% | 0.8362 | 16.1% | 8.3%  | 26.7% | N/A |
| 34 | North West    | Dr Ruth Segomotsi Mompati(DC39 ) | 2 | 17.0% | 10.5% | 24.8% | N/A | 12.4% | 6.7%  | 19.7% | 0.9974 | 13.1% | 7.4%  | 20.2% | N/A |
| 35 | Western Cape  | Eden(DC4 )                       | 2 | 22.8% | 12.1% | 36.7% | N/A | 11.8% | 3.1%  | 29.0% | 0.8861 | 20.1% | 8.1%  | 38.6% | N/A |
| 36 | Mpumalanga    | Ehlanzeni(DC32 )                 | 2 | 10.6% | 5.8%  | 17.0% | N/A | 6.0%  | 2.6%  | 11.1% | 0.6463 | 13.3% | 7.6%  | 20.3% | N/A |
| 38 | Gauteng       | Ekurhuleni(EKU )                 | 2 | 10.8% | 5.5%  | 18.2% | N/A | 9.4%  | 2.5%  | 23.1% | 0.8025 | 21.1% | 12.8% | 31.3% | N/A |
| 39 | Free State    | Fezile Dabi(DC20 )               | 2 | 14.9% | 5.7%  | 29.8% | N/A | 9.4%  | 2.5%  | 23.3% | 0.8069 | 18.1% | 9.0%  | 30.2% | N/A |
| 40 | Northern Cape | Frances Baard(DC9 )              | 2 | 14.2% | 8.1%  | 21.9% | N/A | 4.7%  | 1.8%  | 9.3%  | 0.3905 | 10.3% | 5.5%  | 16.7% | N/A |
| 41 | Mpumalanga    | Gert Sibande(DC30 )              | 2 | 14.2% | 8.6%  | 21.0% | N/A | 8.6%  | 2.3%  | 21.1% | 0.769  | 21.4% | 14.3% | 29.5% | N/A |
| 42 | Limpopo       | Greater Sekhukhune(DC47 )        | 2 | 18.0% | 11.2% | 26.0% | N/A | 5.8%  | 2.5%  | 10.8% | 0.6066 | 9.4%  | 5.0%  | 15.1% | N/A |
| 44 | Eastern Cape  | Joe Gqabi(DC14 )                 | 2 | 10.5% | 5.3%  | 17.6% | N/A | 7.6%  | 2.0%  | 19.1% | 0.6798 | 20.0% | 12.1% | 29.7% | N/A |
| 45 | Northern Cape | John Taolo Gaetsewe(DC45 )       | 2 | 9.1%  | 4.0%  | 16.7% | N/A | 14.7% | 6.6%  | 25.7% | 0.9957 | 11.6% | 5.6%  | 20.3% | N/A |
| 46 | Free State    | Lejweleputswa(DC18 )             | 2 | 19.4% | 11.1% | 29.9% | N/A | 13.0% | 6.2%  | 22.4% | 0.9947 | 15.9% | 6.3%  | 31.0% | N/A |
| 47 | Free State    | Mangaung(MAN )                   | 2 | 15.6% | 7.4%  | 26.6% | N/A | 9.4%  | 2.4%  | 23.5% | 0.7897 | 19.7% | 7.8%  | 38.7% | N/A |
| 48 | Limpopo       | Mopani(DC33 )                    | 2 | 12.2% | 6.3%  | 19.9% | N/A | 6.8%  | 2.7%  | 13.0% | 0.7201 | 20.5% | 12.2% | 30.6% | N/A |
| 50 | Northern Cape | Namakwa(DC6 )                    | 2 | 14.7% | 5.7%  | 29.1% | N/A | 10.7% | 3.0%  | 26.0% | 0.8658 | 15.5% | 5.9%  | 30.8% | N/A |
| 51 | Eastern Cape  | Nelson Mandela Bay(NMA )         | 2 | 11.4% | 6.0%  | 18.3% | N/A | 6.0%  | 2.4%  | 11.6% | 0.6202 | 17.6% | 10.5% | 26.6% | N/A |
| 52 | North West    | Ngaka Modiri Molema(DC38 )       | 2 | 19.0% | 11.9% | 27.9% | N/A | 11.7% | 6.0%  | 19.3% | 0.9936 | 9.6%  | 4.9%  | 15.9% | N/A |
| 53 | Mpumalanga    | Nkangala(DC31 )                  | 2 | 9.7%  | 4.8%  | 16.3% | N/A | 9.3%  | 2.6%  | 22.1% | 0.8075 | 17.3% | 7.1%  | 33.3% | N/A |
| 54 | Eastern Cape  | O.R.Tambo(DC15 )                 | 2 | 24.8% | 16.8% | 33.8% | N/A | 4.4%  | 1.7%  | 8.6%  | 0.3192 | 31.4% | 22.3% | 41.3% | N/A |
| 56 | Western Cape  | Overberg(DC3 )                   | 2 | 14.1% | 5.2%  | 28.3% | N/A | 8.8%  | 3.7%  | 16.3% | 0.9011 | 25.0% | 15.7% | 35.8% | N/A |
| 57 | Northern Cape | Pixley ka Seme(DC7 )             | 2 | 15.3% | 5.9%  | 30.5% | N/A | 10.1% | 2.7%  | 24.1% | 0.8434 | 19.0% | 7.6%  | 35.7% | N/A |
| 58 | Gauteng       | Sedibeng(DC42 )                  | 2 | 14.7% | 8.4%  | 22.9% | N/A | 9.6%  | 4.5%  | 16.9% | 0.9546 | 14.6% | 8.3%  | 22.5% | N/A |
| 59 | KwaZulu-Natal | Sisonke(DC43 )                   | 2 | 20.0% | 12.9% | 28.6% | N/A | 7.5%  | 1.9%  | 18.9% | 0.6726 | 50.2% | 39.8% | 60.8% | N/A |

1

2

|    |               |                                  |   |       |       |       |     |       |       |       |        |       |       |       |     |
|----|---------------|----------------------------------|---|-------|-------|-------|-----|-------|-------|-------|--------|-------|-------|-------|-----|
| 3  | Northern Cape | Siyanda(DC8 )                    | 2 | 10.5% | 5.2%  | 17.5% | N/A | 26.1% | 16.1% | 38.3% | 1      | 8.6%  | 4.1%  | 15.0% | N/A |
| 4  | Free State    | Thabo Mofutsanyane(DC19 )        | 2 | 16.1% | 8.2%  | 27.1% | N/A | 13.7% | 6.0%  | 25.5% | 0.9908 | 27.0% | 15.7% | 41.1% | N/A |
| 5  | KwaZulu-Natal | UMgungundlovu(DC22 )             | 2 | 19.4% | 12.3% | 28.3% | N/A | 6.8%  | 1.8%  | 17.3% | 0.6059 | 16.6% | 9.9%  | 24.6% | N/A |
| 6  | KwaZulu-Natal | Ugu(DC21 )                       | 2 | 17.2% | 11.3% | 23.9% | N/A | 5.0%  | 2.3%  | 8.8%  | 0.4501 | 36.3% | 28.2% | 44.7% | N/A |
| 7  | KwaZulu-Natal | Umkhanyakude(DC27 )              | 2 | 18.3% | 9.6%  | 29.7% | N/A | 7.1%  | 1.7%  | 18.6% | 0.6238 | 30.8% | 18.6% | 44.7% | N/A |
| 8  | KwaZulu-Natal | Umzinyathi(DC24 )                | 2 | 14.5% | 5.5%  | 29.2% | N/A | 6.6%  | 1.7%  | 17.0% | 0.5943 | 22.6% | 9.3%  | 42.2% | N/A |
| 9  | KwaZulu-Natal | Uthukela(DC23 )                  | 2 | 11.1% | 7.3%  | 15.6% | N/A | 3.0%  | 1.3%  | 5.5%  | 0.0477 | 25.4% | 19.6% | 31.7% | N/A |
| 10 | KwaZulu-Natal | Uthungulu(DC28 )                 | 2 | 16.0% | 9.5%  | 24.2% | N/A | 6.0%  | 2.5%  | 11.2% | 0.6329 | 28.7% | 19.9% | 38.6% | N/A |
| 11 | Limpopo       | Vhembe(DC34 )                    | 2 | 31.6% | 20.1% | 44.8% | N/A | 7.2%  | 1.8%  | 19.1% | 0.6245 | 30.0% | 18.9% | 43.1% | N/A |
| 12 | Limpopo       | Waterberg(DC36 )                 | 2 | 18.2% | 11.1% | 26.6% | N/A | 7.1%  | 3.1%  | 12.8% | 0.7899 | 14.8% | 8.6%  | 22.5% | N/A |
| 13 | Western Cape  | West Coast(DC1 )                 | 2 | 13.8% | 5.0%  | 28.6% | N/A | 10.3% | 2.6%  | 25.9% | 0.8387 | 20.7% | 8.2%  | 39.2% | N/A |
| 14 | Gauteng       | West Rand(DC48 )                 | 2 | 11.1% | 5.4%  | 19.3% | N/A | 7.1%  | 2.7%  | 14.2% | 0.7375 | 22.4% | 13.0% | 33.8% | N/A |
| 15 | Free State    | Xhariep(DC16 )                   | 2 | 15.7% | 6.0%  | 31.4% | N/A | 8.7%  | 2.4%  | 21.7% | 0.7647 | 24.7% | 14.4% | 37.2% | N/A |
| 16 | KwaZulu-Natal | Zululand(DC26 )                  | 2 | 11.4% | 6.0%  | 18.4% | N/A | 6.1%  | 2.5%  | 11.9% | 0.6421 | 12.7% | 6.8%  | 20.2% | N/A |
| 17 | KwaZulu-Natal | eThekweni(ETH )                  | 2 | 15.5% | 9.6%  | 22.6% | N/A | 4.9%  | 2.1%  | 9.2%  | 0.4327 | 32.5% | 23.8% | 42.1% | N/A |
| 18 | KwaZulu-Natal | iLembe(DC29 )                    | 2 | 8.9%  | 4.4%  | 14.9% | N/A | 5.2%  | 2.1%  | 10.3% | 0.4818 | 29.4% | 20.1% | 39.7% | N/A |
| 19 | Eastern Cape  | Alfred Nzo(DC44 )                | 3 | 17.0% | 9.7%  | 26.5% | N/A | 6.2%  | 2.5%  | 12.3% | 0.6337 | 25.0% | 15.7% | 36.2% | N/A |
| 20 | KwaZulu-Natal | Amajuba(DC25 )                   | 3 | 12.2% | 6.8%  | 19.4% | N/A | 4.5%  | 1.8%  | 8.8%  | 0.341  | 14.3% | 8.3%  | 21.9% | N/A |
| 21 | Eastern Cape  | Amathole(DC12 )                  | 3 | 12.1% | 5.4%  | 22.2% | N/A | 10.1% | 3.5%  | 20.9% | 0.901  | 17.1% | 7.8%  | 29.7% | N/A |
| 22 | North West    | Bojanala(DC37 )                  | 3 | 8.6%  | 4.1%  | 14.7% | N/A | 5.7%  | 2.2%  | 11.1% | 0.5831 | 10.3% | 5.2%  | 17.2% | N/A |
| 23 | Eastern Cape  | Buffalo City(BUF )               | 3 | 14.3% | 5.2%  | 30.4% | N/A | 11.2% | 2.2%  | 33.1% | 0.7951 | 39.0% | 20.0% | 61.1% | N/A |
| 24 | Eastern Cape  | Cacadu(DC10 )                    | 3 | 9.8%  | 4.7%  | 16.9% | N/A | 6.6%  | 2.6%  | 13.0% | 0.7016 | 12.5% | 6.3%  | 20.5% | N/A |
| 25 | Western Cape  | Cape Winelands(DC2 )             | 3 | 9.0%  | 4.3%  | 15.7% | N/A | 5.0%  | 1.7%  | 10.3% | 0.4359 | 17.1% | 9.6%  | 26.4% | N/A |
| 26 | Limpopo       | Capricorn(DC35 )                 | 3 | 17.1% | 10.5% | 25.3% | N/A | 4.6%  | 1.8%  | 8.9%  | 0.3588 | 11.2% | 6.1%  | 17.9% | N/A |
| 27 | Western Cape  | Central Karoo(DC5 )              | 3 | 11.6% | 6.0%  | 19.0% | N/A | 4.9%  | 1.8%  | 10.0% | 0.4155 | 13.8% | 7.5%  | 22.1% | N/A |
| 28 | Eastern Cape  | Chris Hani(DC13 )                | 3 | 12.4% | 6.9%  | 19.6% | N/A | 8.9%  | 4.2%  | 15.6% | 0.9323 | 22.2% | 14.2% | 31.4% | N/A |
| 29 | Western Cape  | City of Cape Town(CPT )          | 3 | 10.1% | 5.7%  | 15.8% | N/A | 4.8%  | 2.0%  | 9.0%  | 0.403  | 23.3% | 16.2% | 31.5% | N/A |
| 30 | Gauteng       | City of Johannesburg(JHB )       | 3 | 14.7% | 8.9%  | 21.8% | N/A | 10.6% | 5.6%  | 17.3% | 0.9889 | 14.5% | 8.6%  | 21.6% | N/A |
| 31 | Gauteng       | City of Tshwane(TSH )            | 3 | 9.4%  | 5.2%  | 15.1% | N/A | 6.1%  | 2.8%  | 10.9% | 0.675  | 14.6% | 9.0%  | 21.8% | N/A |
| 32 | North West    | Dr Kenneth Kaunda(DC40 )         | 3 | 15.9% | 8.0%  | 26.5% | N/A | 7.6%  | 2.1%  | 19.0% | 0.6966 | 17.6% | 9.1%  | 29.4% | N/A |
| 33 | North West    | Dr Ruth Segomotsi Mompati(DC39 ) | 3 | 21.0% | 13.3% | 30.0% | N/A | 4.6%  | 1.7%  | 9.1%  | 0.3583 | 13.5% | 7.7%  | 21.1% | N/A |
| 34 | Western Cape  | Eden(DC4 )                       | 3 | 10.6% | 4.6%  | 19.4% | N/A | 20.0% | 9.4%  | 34.8% | 0.9997 | 13.5% | 6.2%  | 23.4% | N/A |
| 35 | Mpumalanga    | Ehlanzeni(DC32 )                 | 3 | 26.6% | 19.0% | 35.2% | N/A | 8.6%  | 4.5%  | 14.0% | 0.9527 | 23.1% | 16.1% | 31.0% | N/A |
| 36 | Gauteng       | Ekurhuleni(EKU )                 | 3 | 8.0%  | 3.9%  | 13.7% | N/A | 4.3%  | 1.6%  | 8.8%  | 0.3087 | 14.5% | 8.2%  | 22.6% | N/A |
| 37 | Free State    | Fezile Dabi(DC20 )               | 3 | 13.4% | 6.3%  | 23.9% | N/A | 7.1%  | 1.9%  | 17.8% | 0.6345 | 17.2% | 8.2%  | 29.2% | N/A |
| 38 | Northern Cape | Frances Baard(DC9 )              | 3 | 9.1%  | 4.7%  | 15.3% | N/A | 5.8%  | 2.4%  | 11.0% | 0.6016 | 10.2% | 5.4%  | 16.6% | N/A |
| 39 | Mpumalanga    | Gert Sibande(DC30 )              | 3 | 12.9% | 7.6%  | 19.4% | N/A | 13.3% | 7.5%  | 20.6% | 0.9999 | 22.2% | 14.9% | 30.6% | N/A |
| 40 | Limpopo       | Greater Sekhukhune(DC47 )        | 3 | 11.0% | 6.6%  | 16.6% | N/A | 4.1%  | 1.8%  | 7.6%  | 0.2448 | 14.2% | 8.9%  | 20.8% | N/A |
| 41 | Eastern Cape  | Joe Gqabi(DC14 )                 | 3 | 18.8% | 11.2% | 28.5% | N/A | 3.7%  | 1.3%  | 7.8%  | 0.2    | 29.1% | 19.5% | 40.1% | N/A |
| 42 | Northern Cape | John Taolo Gaetsewe(DC45 )       | 3 | 8.8%  | 4.1%  | 15.6% | N/A | 5.9%  | 2.1%  | 11.9% | 0.5754 | 14.4% | 7.6%  | 23.5% | N/A |
| 43 | Free State    | Lejweleputswa(DC18 )             | 3 | 14.8% | 7.9%  | 23.7% | N/A | 7.4%  | 3.1%  | 13.8% | 0.798  | 12.2% | 6.3%  | 20.1% | N/A |
| 44 | Free State    | Mangaung(MAN )                   | 3 | 17.6% | 9.3%  | 28.5% | N/A | 7.0%  | 1.7%  | 18.0% | 0.6214 | 15.6% | 7.8%  | 26.0% | N/A |
| 45 | Limpopo       | Mopani(DC33 )                    | 3 | 23.9% | 14.7% | 34.6% | N/A | 9.0%  | 3.9%  | 16.5% | 0.92   | 26.7% | 17.0% | 37.8% | N/A |
| 46 | Northern Cape | Namakwa(DC6 )                    | 3 | 13.3% | 6.6%  | 22.3% | N/A | 9.8%  | 4.1%  | 18.2% | 0.9336 | 11.6% | 5.5%  | 20.2% | N/A |
| 47 | Eastern Cape  | Nelson Mandela Bay(NMA )         | 3 | 16.1% | 9.1%  | 25.0% | N/A | 4.9%  | 1.7%  | 10.2% | 0.4129 | 20.3% | 11.8% | 30.9% | N/A |
| 48 | North West    | Ngaka Modiri Molema(DC38 )       | 3 | 16.0% | 9.8%  | 23.5% | N/A | 6.6%  | 2.9%  | 11.8% | 0.7373 | 24.9% | 16.9% | 33.9% | N/A |
| 49 | Mpumalanga    | Nkangala(DC31 )                  | 3 | 7.3%  | 3.3%  | 13.2% | N/A | 5.7%  | 2.1%  | 11.3% | 0.5696 | 16.9% | 9.5%  | 26.4% | N/A |
| 50 | Eastern Cape  | O.R.Tambo(DC15 )                 | 3 | 13.1% | 7.4%  | 20.3% | N/A | 3.2%  | 1.1%  | 6.5%  | 0.1062 | 30.8% | 21.9% | 40.7% | N/A |

1

2

|    |               |                                  |   |       |       |       |     |       |      |       |        |       |       |       |     |
|----|---------------|----------------------------------|---|-------|-------|-------|-----|-------|------|-------|--------|-------|-------|-------|-----|
| 3  | Western Cape  | Overberg(DC3 )                   | 3 | 8.8%  | 4.3%  | 15.0% | N/A | 7.3%  | 1.9% | 18.6% | 0.6533 | 33.8% | 23.3% | 45.2% | N/A |
| 4  | Northern Cape | Pixley ka Seme(DC7 )             | 3 | 13.4% | 5.0%  | 26.8% | N/A | 15.5% | 6.7% | 28.7% | 0.9958 | 15.2% | 7.3%  | 26.6% | N/A |
| 5  | Gauteng       | Sedibeng(DC42 )                  | 3 | 10.6% | 5.6%  | 17.2% | N/A | 5.9%  | 2.4% | 11.0% | 0.609  | 13.2% | 7.6%  | 20.7% | N/A |
| 6  | KwaZulu-Natal | Sisonke(DC43 )                   | 3 | 14.6% | 9.2%  | 21.3% | N/A | 9.3%  | 5.0% | 15.0% | 0.9734 | 29.5% | 21.7% | 38.0% | N/A |
| 7  | Northern Cape | Siyanda(DC8 )                    | 3 | 14.1% | 8.2%  | 21.8% | N/A | 13.7% | 7.5% | 21.7% | 0.9988 | 8.2%  | 4.1%  | 13.6% | N/A |
| 8  | Free State    | Thabo Mofutsanvane(DC19 )        | 3 | 17.3% | 9.2%  | 28.2% | N/A | 5.2%  | 1.7% | 11.3% | 0.4635 | 14.7% | 7.3%  | 24.4% | N/A |
| 9  | KwaZulu-Natal | UMgungundlovu(DC22 )             | 3 | 12.9% | 7.3%  | 20.2% | N/A | 7.7%  | 3.5% | 13.9% | 0.8559 | 21.6% | 13.8% | 30.9% | N/A |
| 10 | KwaZulu-Natal | Ugu(DC21 )                       | 3 | 17.6% | 11.8% | 24.3% | N/A | 5.3%  | 2.5% | 9.3%  | 0.5197 | 25.8% | 18.7% | 33.9% | N/A |
| 11 | KwaZulu-Natal | Umkhanyakude(DC27 )              | 3 | 10.4% | 5.6%  | 16.8% | N/A | 3.2%  | 1.1% | 6.7%  | 0.1092 | 19.0% | 11.9% | 27.3% | N/A |
| 12 | KwaZulu-Natal | Umzinyathi(DC24 )                | 3 | 12.7% | 4.9%  | 25.5% | N/A | 5.0%  | 1.3% | 12.9% | 0.3875 | 21.1% | 8.4%  | 39.7% | N/A |
| 13 | KwaZulu-Natal | Uthukela(DC23 )                  | 3 | 13.7% | 9.5%  | 18.4% | N/A | 3.4%  | 1.7% | 5.9%  | 0.091  | 23.6% | 18.2% | 29.5% | N/A |
| 14 | KwaZulu-Natal | Uthungulu(DC28 )                 | 3 | 16.1% | 9.9%  | 23.6% | N/A | 3.3%  | 1.2% | 6.6%  | 0.1242 | 23.7% | 16.0% | 32.3% | N/A |
| 15 | Limpopo       | Vhembe(DC34 )                    | 3 | 7.5%  | 3.4%  | 13.7% | N/A | 3.4%  | 1.1% | 7.4%  | 0.1458 | 9.7%  | 4.7%  | 16.4% | N/A |
| 16 | Limpopo       | Waterberg(DC36 )                 | 3 | 12.5% | 7.3%  | 19.5% | N/A | 6.5%  | 1.8% | 15.9% | 0.5857 | 9.2%  | 4.9%  | 15.2% | N/A |
| 17 | Western Cape  | West Coast(DC1 )                 | 3 | 7.5%  | 3.3%  | 13.6% | N/A | 7.7%  | 3.1% | 14.6% | 0.8136 | 19.9% | 11.2% | 30.5% | N/A |
| 18 | Gauteng       | West Rand(DC48 )                 | 3 | 18.7% | 10.2% | 29.8% | N/A | 4.9%  | 1.6% | 10.4% | 0.3999 | 19.3% | 10.5% | 30.5% | N/A |
| 19 | Free State    | Xhariep(DC16 )                   | 3 | 9.7%  | 4.5%  | 17.1% | N/A | 4.8%  | 1.6% | 10.1% | 0.3945 | 12.3% | 6.0%  | 20.5% | N/A |
| 20 | KwaZulu-Natal | Zululand(DC26 )                  | 3 | 12.8% | 7.1%  | 20.0% | N/A | 3.6%  | 1.3% | 7.4%  | 0.1669 | 25.9% | 17.4% | 36.1% | N/A |
| 21 | KwaZulu-Natal | eThekwinini(ETH )                | 3 | 9.5%  | 5.7%  | 14.5% | N/A | 4.9%  | 2.3% | 8.6%  | 0.4256 | 26.5% | 19.6% | 33.9% | N/A |
| 22 | KwaZulu-Natal | iLembe(DC29 )                    | 3 | 16.1% | 9.0%  | 25.4% | N/A | 4.4%  | 1.5% | 9.4%  | 0.3189 | 22.0% | 13.0% | 32.6% | N/A |
| 23 | Eastern Cape  | Alfred Nzo(DC44 )                | 4 | 14.7% | 8.2%  | 23.1% | N/A | 2.8%  | 0.9% | 6.3%  | 0.0755 | 13.5% | 7.3%  | 21.5% | N/A |
| 24 | KwaZulu-Natal | Amajuba(DC25 )                   | 4 | 8.0%  | 4.5%  | 12.6% | N/A | 3.9%  | 1.0% | 10.1% | 0.2334 | 10.7% | 6.4%  | 16.0% | N/A |
| 25 | Eastern Cape  | Amathole(DC12 )                  | 4 | 9.3%  | 3.9%  | 17.8% | N/A | 6.9%  | 1.6% | 17.7% | 0.5961 | 22.2% | 11.3% | 36.2% | N/A |
| 26 | North West    | Bojanala(DC37 )                  | 4 | 8.9%  | 4.5%  | 15.0% | N/A | 4.9%  | 1.3% | 12.6% | 0.3855 | 8.9%  | 4.5%  | 14.9% | N/A |
| 27 | Eastern Cape  | Buffalo City(BUF )               | 4 | 10.0% | 3.9%  | 19.9% | N/A | 8.2%  | 1.6% | 25.1% | 0.6461 | 25.5% | 12.5% | 42.7% | N/A |
| 28 | Eastern Cape  | Cacadu(DC10 )                    | 4 | 9.0%  | 4.4%  | 15.7% | N/A | 4.2%  | 1.4% | 8.7%  | 0.2758 | 26.5% | 16.8% | 38.0% | N/A |
| 29 | Western Cape  | Cape Winelands(DC2 )             | 4 | 6.2%  | 3.0%  | 10.7% | N/A | 6.2%  | 1.6% | 15.6% | 0.5444 | 10.6% | 5.9%  | 16.5% | N/A |
| 30 | Limpopo       | Capricorn(DC35 )                 | 4 | 9.6%  | 5.1%  | 15.5% | N/A | 3.4%  | 1.3% | 6.9%  | 0.1341 | 11.8% | 6.7%  | 18.5% | N/A |
| 31 | Western Cape  | Central Karoo(DC5 )              | 4 | 8.6%  | 4.1%  | 15.1% | N/A | 4.6%  | 1.6% | 9.4%  | 0.3614 | 7.9%  | 3.6%  | 14.2% | N/A |
| 32 | Eastern Cape  | Chris Hani(DC13 )                | 4 | 9.1%  | 4.7%  | 14.9% | N/A | 3.8%  | 1.5% | 7.6%  | 0.1996 | 15.9% | 9.5%  | 23.7% | N/A |
| 33 | Western Cape  | City of Cape Town(CPT )          | 4 | 8.5%  | 3.0%  | 18.8% | N/A | 7.0%  | 3.3% | 12.2% | 0.8015 | 15.4% | 9.5%  | 22.5% | N/A |
| 34 | Gauteng       | City of Johannesburg(JHB )       | 4 | 6.6%  | 3.5%  | 10.7% | N/A | 8.4%  | 4.6% | 13.4% | 0.9533 | 8.0%  | 4.5%  | 12.6% | N/A |
| 35 | Gauteng       | City of Tshwane(TSH )            | 4 | 4.5%  | 2.1%  | 7.9%  | N/A | 3.7%  | 1.5% | 7.0%  | 0.1582 | 6.0%  | 3.1%  | 10.1% | N/A |
| 36 | North West    | Dr Kenneth Kaunda(DC40 )         | 4 | 6.9%  | 2.8%  | 13.1% | N/A | 5.4%  | 1.8% | 11.6% | 0.4939 | 8.0%  | 3.5%  | 15.0% | N/A |
| 37 | North West    | Dr Ruth Segomotsi Mompati(DC39 ) | 4 | 8.0%  | 4.2%  | 13.3% | N/A | 7.0%  | 3.3% | 12.2% | 0.8128 | 5.2%  | 2.5%  | 9.2%  | N/A |
| 38 | Western Cape  | Eden(DC4 )                       | 4 | 9.0%  | 3.3%  | 19.0% | N/A | 6.6%  | 1.6% | 17.3% | 0.5772 | 13.2% | 6.1%  | 23.0% | N/A |
| 39 | Mpumalanga    | Ehlanzeni(DC32 )                 | 4 | 6.6%  | 3.5%  | 10.8% | N/A | 3.4%  | 1.4% | 6.4%  | 0.1089 | 12.5% | 7.6%  | 18.3% | N/A |
| 40 | Gauteng       | Ekurhuleni(EKU )                 | 4 | 4.4%  | 2.0%  | 7.8%  | N/A | 6.5%  | 3.0% | 11.5% | 0.7371 | 9.3%  | 5.0%  | 15.0% | N/A |
| 41 | Free State    | Fezile Dabi(DC20 )               | 4 | 6.7%  | 2.8%  | 12.8% | N/A | 5.2%  | 1.3% | 13.4% | 0.4179 | 21.5% | 11.8% | 33.9% | N/A |
| 42 | Northern Cape | Frances Baard(DC9 )              | 4 | 10.9% | 6.1%  | 17.1% | N/A | 3.4%  | 1.3% | 7.0%  | 0.139  | 7.2%  | 3.6%  | 12.2% | N/A |
| 43 | Mpumalanga    | Gert Sibande(DC30 )              | 4 | 12.5% | 7.3%  | 19.1% | N/A | 4.7%  | 2.0% | 9.0%  | 0.3821 | 13.1% | 7.7%  | 19.9% | N/A |
| 44 | Limpopo       | Greater Sekhukhune(DC47 )        | 4 | 11.9% | 7.2%  | 17.6% | N/A | 5.4%  | 2.5% | 9.6%  | 0.5501 | 5.8%  | 3.0%  | 9.6%  | N/A |
| 45 | Eastern Cape  | Joe Gqabi(DC14 )                 | 4 | 16.4% | 9.4%  | 25.3% | N/A | 3.2%  | 1.1% | 6.9%  | 0.1167 | 13.4% | 7.3%  | 21.2% | N/A |
| 46 | Northern Cape | John Taolo Gaetsewe(DC45 )       | 4 | 9.7%  | 5.2%  | 16.0% | N/A | 8.4%  | 3.9% | 14.6% | 0.9098 | 6.5%  | 3.1%  | 11.4% | N/A |
| 47 | Free State    | Lejweleputswa(DC18 )             | 4 | 13.2% | 7.4%  | 20.8% | N/A | 5.4%  | 2.2% | 10.4% | 0.5142 | 9.4%  | 4.8%  | 15.4% | N/A |
| 48 | Free State    | Mangaung(MAN )                   | 4 | 8.5%  | 3.7%  | 15.8% | N/A | 5.4%  | 1.8% | 11.8% | 0.4869 | 15.0% | 7.7%  | 24.9% | N/A |
| 49 | Limpopo       | Mopani(DC33 )                    | 4 | 6.9%  | 3.3%  | 12.0% | N/A | 5.3%  | 2.1% | 10.3% | 0.5005 | 8.7%  | 4.4%  | 14.5% | N/A |
| 50 | Northern Cape | Namakwa(DC6 )                    | 4 | 7.6%  | 3.4%  | 13.9% | N/A | 7.1%  | 2.8% | 13.8% | 0.7477 | 8.7%  | 4.1%  | 15.4% | N/A |



1

2

|    |               |                                  |   |       |      |       |        |      |      |       |        |       |       |       |        |
|----|---------------|----------------------------------|---|-------|------|-------|--------|------|------|-------|--------|-------|-------|-------|--------|
| 3  | Eastern Cape  | Nelson Mandela Bay(NMA )         | 4 | 10.6% | 5.5% | 17.6% | N/A    | 4.2% | 1.0% | 11.9% | 0.282  | 18.9% | 11.3% | 28.4% | N/A    |
| 4  | North West    | Ngaka Modiri Molema(DC38 )       | 4 | 9.4%  | 5.2% | 15.0% | N/A    | 7.1% | 3.4% | 12.3% | 0.8173 | 10.9% | 6.3%  | 17.0% | N/A    |
| 5  | Mpumalanga    | Nkangala(DC31 )                  | 4 | 5.7%  | 2.6% | 10.2% | N/A    | 5.1% | 1.4% | 12.8% | 0.3983 | 15.5% | 9.0%  | 23.7% | N/A    |
| 6  | Eastern Cape  | O.R.Tambo(DC15 )                 | 4 | 8.6%  | 4.9% | 13.3% | N/A    | 3.8% | 0.9% | 10.4% | 0.2255 | 24.9% | 18.4% | 32.3% | N/A    |
| 8  | Western Cape  | Overberg(DC3 )                   | 4 | 6.3%  | 2.9% | 11.2% | N/A    | 3.1% | 1.0% | 6.6%  | 0.1012 | 20.5% | 12.8% | 29.5% | N/A    |
| 9  | Northern Cape | Pixley ka Seme(DC7 )             | 4 | 7.6%  | 3.2% | 14.2% | N/A    | 4.9% | 1.7% | 10.6% | 0.4143 | 14.2% | 7.0%  | 24.3% | N/A    |
| 10 | Gauteng       | Sedibeng(DC42 )                  | 4 | 8.7%  | 4.4% | 14.6% | N/A    | 3.4% | 1.2% | 7.1%  | 0.1509 | 12.9% | 7.2%  | 20.4% | N/A    |
| 11 | KwaZulu-Natal | Sisonke(DC43 )                   | 4 | 7.0%  | 3.7% | 11.5% | N/A    | 2.5% | 0.9% | 5.2%  | 0.0337 | 10.1% | 5.6%  | 15.7% | N/A    |
| 12 | Northern Cape | Siyanda(DC8 )                    | 4 | 9.0%  | 4.8% | 14.9% | N/A    | 6.8% | 3.0% | 12.3% | 0.761  | 5.0%  | 2.2%  | 9.0%  | N/A    |
| 14 | Free State    | Thabo Mofutsanyane(DC19 )        | 4 | 6.9%  | 3.0% | 12.8% | N/A    | 4.8% | 1.3% | 12.3% | 0.3625 | 11.8% | 5.9%  | 20.0% | N/A    |
| 15 | KwaZulu-Natal | UMgungundlovu(DC22 )             | 4 | 6.4%  | 3.2% | 10.9% | N/A    | 2.3% | 0.8% | 4.9%  | 0.0216 | 14.8% | 9.1%  | 21.7% | N/A    |
| 16 | KwaZulu-Natal | Ugu(DC21 )                       | 4 | 7.3%  | 4.1% | 11.4% | N/A    | 2.9% | 1.2% | 5.6%  | 0.0537 | 18.0% | 12.4% | 24.6% | N/A    |
| 17 | KwaZulu-Natal | Umkhanyakude(DC27 )              | 4 | 7.4%  | 3.6% | 12.4% | N/A    | 3.8% | 1.0% | 10.2% | 0.23   | 14.1% | 8.2%  | 21.7% | N/A    |
| 18 | KwaZulu-Natal | Umzinyathi(DC24 )                | 4 | 8.8%  | 3.3% | 18.9% | N/A    | 3.6% | 0.9% | 9.8%  | 0.1991 | 15.2% | 5.8%  | 30.8% | N/A    |
| 20 | KwaZulu-Natal | Uthukela(DC23 )                  | 4 | 9.6%  | 6.4% | 13.3% | N/A    | 5.0% | 2.8% | 7.8%  | 0.4454 | 14.7% | 10.8% | 19.4% | N/A    |
| 21 | KwaZulu-Natal | Uthungulu(DC28 )                 | 4 | 11.4% | 6.9% | 17.2% | N/A    | 3.2% | 1.3% | 6.4%  | 0.093  | 18.9% | 12.6% | 26.1% | N/A    |
| 22 | Limpopo       | Vhembe(DC34 )                    | 4 | 13.5% | 7.8% | 20.7% | N/A    | 2.4% | 0.7% | 5.2%  | 0.0304 | 8.3%  | 4.2%  | 13.8% | N/A    |
| 23 | Limpopo       | Waterberg(DC36 )                 | 4 | 8.2%  | 4.4% | 13.1% | N/A    | 3.5% | 1.4% | 6.7%  | 0.1388 | 7.3%  | 3.8%  | 12.0% | N/A    |
| 24 | Western Cape  | West Coast(DC1 )                 | 4 | 5.2%  | 2.2% | 9.9%  | N/A    | 4.5% | 1.6% | 9.5%  | 0.34   | 8.2%  | 3.7%  | 14.7% | N/A    |
| 26 | Gauteng       | West Rand(DC48 )                 | 4 | 6.2%  | 2.6% | 11.9% | N/A    | 4.1% | 1.3% | 8.9%  | 0.2656 | 11.4% | 5.4%  | 19.8% | N/A    |
| 27 | Free State    | Xhariep(DC16 )                   | 4 | 13.4% | 6.9% | 22.1% | N/A    | 4.8% | 1.3% | 12.4% | 0.3584 | 8.6%  | 3.9%  | 15.1% | N/A    |
| 28 | KwaZulu-Natal | Zululand(DC26 )                  | 4 | 8.3%  | 4.5% | 13.2% | N/A    | 2.9% | 1.1% | 5.9%  | 0.0707 | 17.7% | 11.5% | 25.0% | N/A    |
| 29 | KwaZulu-Natal | eThekweni(ETH )                  | 4 | 12.7% | 8.2% | 17.9% | N/A    | 2.0% | 0.8% | 4.1%  | 0.0055 | 29.2% | 22.4% | 36.5% | N/A    |
| 30 | KwaZulu-Natal | iLembe(DC29 )                    | 4 | 7.0%  | 3.6% | 11.6% | N/A    | 2.8% | 1.0% | 5.7%  | 0.0561 | 15.0% | 9.3%  | 22.0% | N/A    |
| 32 | Eastern Cape  | Alfred Nzo(DC44 )                | 5 | 6.6%  | 2.7% | 12.7% | 0.958  | 3.6% | 1.1% | 8.1%  | 0.1844 | 15.1% | 7.7%  | 25.1% | 0.0655 |
| 33 | KwaZulu-Natal | Amajuba(DC25 )                   | 5 | 8.9%  | 4.4% | 15.0% | 0.6443 | 3.1% | 1.1% | 6.7%  | 0.1028 | 11.1% | 5.9%  | 18.0% | 0.2338 |
| 34 | Eastern Cape  | Amathole(DC12 )                  | 5 | 8.2%  | 3.1% | 17.0% | 0.669  | 6.1% | 1.6% | 15.4% | 0.5297 | 19.6% | 8.5%  | 35.6% | 0.6116 |
| 35 | North West    | Bojanala(DC37 )                  | 5 | 8.7%  | 3.9% | 16.4% | 0.3584 | 4.6% | 1.2% | 12.2% | 0.3387 | 11.6% | 5.4%  | 20.5% | 0.6028 |
| 36 | Eastern Cape  | Buffalo City(BUF )               | 5 | 9.3%  | 3.2% | 20.6% | 0.6684 | 7.9% | 1.4% | 25.4% | 0.608  | 22.8% | 9.8%  | 41.2% | 0.0726 |
| 38 | Eastern Cape  | Cacadu(DC10 )                    | 5 | 8.1%  | 3.5% | 15.3% | 0.5055 | 4.9% | 1.3% | 12.7% | 0.3818 | 9.0%  | 4.0%  | 16.5% | 0.2162 |
| 39 | Western Cape  | Cape Winelands(DC2 )             | 5 | 9.6%  | 4.4% | 17.0% | 0.3039 | 5.8% | 2.2% | 11.7% | 0.5642 | 11.2% | 5.5%  | 19.0% | 0.1291 |
| 40 | Limpopo       | Capricorn(DC35 )                 | 5 | 11.9% | 5.9% | 20.2% | 0.6993 | 3.7% | 1.2% | 8.1%  | 0.1959 | 11.8% | 5.8%  | 20.2% | 0.5339 |
| 41 | Western Cape  | Central Karoo(DC5 )              | 5 | 7.5%  | 3.2% | 14.4% | 0.7188 | 6.4% | 2.3% | 13.8% | 0.6329 | 9.9%  | 4.4%  | 18.2% | 0.2008 |
| 42 | Eastern Cape  | Chris Hani(DC13 )                | 5 | 6.2%  | 2.6% | 11.8% | 0.8805 | 3.5% | 1.1% | 7.7%  | 0.1712 | 18.5% | 10.3% | 28.9% | 0.2741 |
| 44 | Western Cape  | City of Cape Town(CPT )          | 5 | 8.3%  | 3.8% | 14.8% | 0.5419 | 6.8% | 2.7% | 13.4% | 0.7178 | 18.5% | 10.4% | 28.3% | 0.2048 |
| 45 | Gauteng       | City of Johannesburg(JHB )       | 5 | 7.6%  | 3.7% | 13.3% | 0.8987 | 4.3% | 1.5% | 8.7%  | 0.2993 | 9.3%  | 4.7%  | 15.7% | 0.1068 |
| 46 | Gauteng       | City of Tshwane(TSH )            | 5 | 6.6%  | 3.2% | 11.5% | 0.6727 | 3.5% | 1.2% | 7.1%  | 0.1517 | 8.0%  | 4.0%  | 13.4% | 0.0405 |
| 47 | North West    | Dr Kenneth Kaunda(DC40 )         | 5 | 11.8% | 5.3% | 21.7% | 0.6061 | 5.0% | 1.5% | 11.5% | 0.4061 | 10.3% | 4.5%  | 19.2% | 0.108  |
| 48 | North West    | Dr Ruth Segomotsi Mompati(DC39 ) | 5 | 7.2%  | 3.2% | 13.2% | 0.9883 | 6.0% | 2.3% | 11.9% | 0.5997 | 7.3%  | 3.3%  | 13.4% | 0.0628 |
| 49 | Western Cape  | Eden(DC4 )                       | 5 | 6.8%  | 2.7% | 13.4% | 0.7027 | 6.1% | 1.4% | 15.7% | 0.5276 | 10.9% | 4.8%  | 20.1% | 0.3119 |
| 50 | Mpumalanga    | Ehlanzeni(DC32 )                 | 5 | 7.2%  | 3.4% | 12.7% | 0.9998 | 3.4% | 1.2% | 7.1%  | 0.1361 | 6.9%  | 3.2%  | 12.3% | 0.0002 |
| 51 | Gauteng       | Ekurhuleni(EKU )                 | 5 | 5.6%  | 2.4% | 10.5% | 0.6546 | 5.9% | 2.3% | 11.7% | 0.6005 | 11.1% | 5.7%  | 18.6% | 0.2311 |
| 52 | Free State    | Fezile Dabi(DC20 )               | 5 | 8.9%  | 3.7% | 17.5% | 0.6807 | 4.8% | 1.3% | 12.4% | 0.3609 | 17.0% | 8.0%  | 29.8% | 0.4831 |
| 53 | Northern Cape | Frances Baard(DC9 )              | 5 | 9.5%  | 4.6% | 16.6% | 0.3076 | 4.0% | 1.4% | 8.6%  | 0.2516 | 6.6%  | 3.0%  | 12.1% | 0.1522 |
| 54 | Mpumalanga    | Gert Sibande(DC30 )              | 5 | 9.0%  | 4.3% | 15.9% | 0.6795 | 3.4% | 1.1% | 7.5%  | 0.1421 | 13.6% | 7.2%  | 22.2% | 0.0581 |
| 55 | Limpopo       | Greater Sekhukhune(DC47 )        | 5 | 6.8%  | 3.0% | 12.3% | 0.7849 | 4.7% | 1.7% | 9.8%  | 0.3635 | 5.9%  | 2.6%  | 10.8% | 0.0085 |
| 56 | Eastern Cape  | Joe Gqabi(DC14 )                 | 5 | 7.4%  | 3.0% | 14.0% | 0.9632 | 3.2% | 0.9% | 7.5%  | 0.1286 | 17.3% | 8.8%  | 28.8% | 0.0514 |
| 57 | Northern Cape | John Taolo Gaetsewe(DC45 )       | 5 | 7.1%  | 3.0% | 13.7% | 0.5346 | 5.5% | 1.8% | 11.8% | 0.4975 | 8.4%  | 3.7%  | 15.7% | 0.0982 |

1  
2

|    |               |                            |   |       |      |       |        |      |      |       |        |       |       |       |        |
|----|---------------|----------------------------|---|-------|------|-------|--------|------|------|-------|--------|-------|-------|-------|--------|
| 3  | Free State    | Lejweleputswa(DC18 )       | 5 | 11.7% | 5.7% | 20.3% | 0.5537 | 4.1% | 1.3% | 9.0%  | 0.2609 | 10.2% | 4.8%  | 18.0% | 0.3243 |
| 4  | Free State    | Mangaung(MAN )             | 5 | 9.8%  | 4.1% | 18.4% | 0.8263 | 4.7% | 1.2% | 12.4% | 0.3582 | 16.1% | 7.5%  | 28.5% | 0.5143 |
| 5  | Limpopo       | Mopani(DC33 )              | 5 | 10.0% | 4.6% | 17.9% | 0.9661 | 5.2% | 1.8% | 11.2% | 0.4653 | 9.6%  | 4.4%  | 17.2% | 0.0022 |
| 6  | Northern Cape | Namakwa(DC6 )              | 5 | 8.2%  | 3.0% | 17.9% | 0.731  | 4.9% | 1.5% | 11.2% | 0.4009 | 8.6%  | 3.6%  | 16.5% | 0.2484 |
| 7  | Eastern Cape  | Nelson Mandela Bay(NMA )   | 5 | 8.9%  | 4.0% | 16.1% | 0.8491 | 3.2% | 0.9% | 7.5%  | 0.1316 | 17.2% | 9.0%  | 27.6% | 0.3095 |
| 8  | North West    | Ngaka Modiri Molema(DC38 ) | 5 | 7.0%  | 3.1% | 12.9% | 0.95   | 4.4% | 1.5% | 9.1%  | 0.3177 | 10.1% | 4.9%  | 17.1% | 0.0032 |
| 9  | Mpumalanga    | Nkangala(DC31 )            | 5 | 8.9%  | 4.0% | 16.6% | 0.2224 | 5.1% | 1.8% | 11.0% | 0.4396 | 11.1% | 5.3%  | 19.5% | 0.1345 |
| 10 | Eastern Cape  | O.R.Tambo(DC15 )           | 5 | 10.1% | 5.4% | 16.4% | 0.5924 | 2.3% | 0.7% | 5.1%  | 0.0279 | 17.9% | 11.0% | 26.1% | 0.0172 |
| 11 | Western Cape  | Overberg(DC3 )             | 5 | 9.0%  | 4.1% | 16.1% | 0.3381 | 4.9% | 1.2% | 12.9% | 0.3739 | 22.0% | 12.8% | 33.7% | 0.0586 |
| 12 | Northern Cape | Pixley ka Seme(DC7 )       | 5 | 9.7%  | 4.0% | 18.7% | 0.5992 | 5.2% | 1.4% | 13.3% | 0.4273 | 12.3% | 4.8%  | 24.8% | 0.311  |
| 13 | Gauteng       | Sedibeng(DC42 )            | 5 | 6.4%  | 2.6% | 12.1% | 0.7712 | 6.6% | 2.4% | 13.3% | 0.6657 | 10.0% | 4.6%  | 17.8% | 0.2336 |
| 14 | KwaZulu-Natal | Sisonke(DC43 )             | 5 | 7.7%  | 3.5% | 14.2% | 0.887  | 2.8% | 0.8% | 6.3%  | 0.0772 | 21.4% | 12.6% | 32.4% | 0.1028 |
| 15 | Northern Cape | Siyanda(DC8 )              | 5 | 11.7% | 5.9% | 19.6% | 0.5127 | 5.2% | 1.9% | 10.6% | 0.4716 | 6.3%  | 2.7%  | 11.8% | 0.2676 |
| 16 | Free State    | Thabo Mofutsanyane(DC19 )  | 5 | 9.0%  | 3.7% | 17.3% | 0.8498 | 4.4% | 1.2% | 11.4% | 0.3145 | 12.4% | 5.5%  | 22.6% | 0.3373 |
| 17 | KwaZulu-Natal | UMgungundlovu(DC22 )       | 5 | 6.6%  | 2.9% | 12.2% | 0.8795 | 3.8% | 1.3% | 8.2%  | 0.2098 | 17.5% | 9.8%  | 27.3% | 0.2441 |
| 18 | KwaZulu-Natal | Ugu(DC21 )                 | 5 | 7.6%  | 3.8% | 12.9% | 0.9731 | 3.3% | 1.2% | 6.7%  | 0.1131 | 20.8% | 13.3% | 29.7% | 0.1827 |
| 19 | KwaZulu-Natal | Umkhanyakude(DC27 )        | 5 | 7.8%  | 3.6% | 14.2% | 0.6034 | 4.4% | 1.5% | 9.7%  | 0.3244 | 11.3% | 5.5%  | 19.3% | 0.0658 |
| 20 | KwaZulu-Natal | Umzinyathi(DC24 )          | 5 | 6.4%  | 2.9% | 11.5% | 0.8143 | 3.4% | 1.2% | 7.3%  | 0.1398 | 12.9% | 6.8%  | 20.7% | 0.1568 |
| 21 | KwaZulu-Natal | Uthukela(DC23 )            | 5 | 7.2%  | 3.5% | 12.5% | 0.9174 | 3.2% | 1.1% | 6.8%  | 0.1074 | 11.4% | 6.2%  | 18.1% | 0.0034 |
| 22 | KwaZulu-Natal | Uthungulu(DC28 )           | 5 | 11.1% | 5.8% | 18.0% | 0.7098 | 3.0% | 1.0% | 6.5%  | 0.0927 | 18.6% | 11.3% | 27.6% | 0.1876 |
| 23 | Limpopo       | Vhembe(DC34 )              | 5 | 9.7%  | 4.5% | 17.3% | 0.1707 | 4.3% | 1.4% | 9.5%  | 0.3067 | 9.8%  | 4.6%  | 17.2% | 0.5039 |
| 24 | Limpopo       | Waterberg(DC36 )           | 5 | 6.0%  | 2.7% | 10.9% | 0.913  | 4.1% | 1.5% | 8.4%  | 0.2555 | 10.6% | 5.4%  | 17.8% | 0.634  |
| 25 | Western Cape  | West Coast(DC1 )           | 5 | 6.6%  | 2.6% | 13.2% | 0.4791 | 4.5% | 1.3% | 10.6% | 0.329  | 12.7% | 5.6%  | 23.0% | 0.1249 |
| 26 | Gauteng       | West Rand(DC48 )           | 5 | 6.3%  | 2.5% | 12.9% | 0.9742 | 3.7% | 1.1% | 8.6%  | 0.2027 | 11.4% | 5.0%  | 20.8% | 0.0971 |
| 27 | Free State    | Xhariep(DC16 )             | 5 | 8.5%  | 3.6% | 16.2% | 0.4699 | 4.4% | 1.2% | 11.5% | 0.3171 | 10.6% | 4.8%  | 19.2% | 0.3661 |
| 28 | KwaZulu-Natal | Zululand(DC26 )            | 5 | 7.6%  | 3.6% | 13.5% | 0.7981 | 2.3% | 0.7% | 5.2%  | 0.033  | 15.9% | 8.9%  | 24.9% | 0.0506 |
| 29 | KwaZulu-Natal | eThekweni(ETH )            | 5 | 6.7%  | 3.2% | 11.5% | 0.6792 | 2.4% | 0.8% | 5.2%  | 0.0314 | 14.7% | 8.6%  | 22.4% | 0.0119 |
| 30 | KwaZulu-Natal | iLembe(DC29 )              | 5 | 7.0%  | 3.2% | 12.9% | 0.9372 | 3.2% | 0.8% | 8.7%  | 0.1436 | 18.0% | 10.3% | 27.9% | 0.2679 |

37  
38  
39  
40  
41  
42  
43  
44  
45  
46  
47  
48  
49  
50  
51  
52  
53  
54  
55  
56  
57  
58  
59  
60



### Supplementary 10: post hoc power analysis

We performed a post hoc power analysis to assess the minimum effect size detectable among infants which has the smallest number of observations. The post hoc power analysis suggests that the sample size in the smallest age group has the power to detect a small effect size ( $w \sim 0.1$  based on Cohens rules of thumb [Cohen, 1988]) when using a chi-square test with 2x9 cells (maximum number of cells tested in our analyses i.e. binary nutritional classification versus province of residence) with 80% power and 5% alpha or type I error.

#### $\chi^2$ tests - Goodness-of-fit tests: Contingency tables

**Analysis:** Post hoc: Compute achieved power

**Input:** Effect size  $w$  = 0.11  
 $\alpha$  err prob = 0.05  
 Total sample size = 1277  
 Df = 8

**Output:** Noncentrality parameter  $\lambda$  = 15.4517000  
 Critical  $\chi^2$  = 15.5073131  
 Power ( $1-\beta$  err prob) = 0.8133607

Cohen, J (1988) Statistical power analysis for the behavioral sciences (2nd ed.). Hillsdale, NJ: Erlbaum.

A summary guideline for effect size determinations is also provided in Kotrlik, JW and Williams, HA (2003) The incorporation of effect size in information technology, learning, and performance research. *Information Technology, Learning, and Performance Journal* **21(1)** 1-7.

| Effect Size                              | Use                           | Small | Medium | Large |
|------------------------------------------|-------------------------------|-------|--------|-------|
| Correlation inc Phi                      |                               | 0.1   | 0.3    | 0.5   |
| <a href="#">Cramer's V</a>               | r x c frequency tables        | 0.1   | 0.3    | 0.5   |
| <a href="#">Difference in arcsines</a>   | Comparing two proportions     | 0.2   | 0.5    | 0.8   |
| $\eta^2$                                 | Anova                         | 0.01  | 0.06   | 0.14  |
| <a href="#">omega-squared</a>            | Anova; See Field (2013)       | 0.01  | 0.06   | 0.14  |
| <a href="#">Multivariate eta-squared</a> | one-way MANOVA                | 0.01  | 0.06   | 0.14  |
| Cohen's f                                | one-way an(c)ova (regression) | 0.1   | 0.25   | 0.4   |
| $\eta^2$                                 | Multiple regression           | 0.02  | 0.13   | 0.26  |
| $\kappa^2$                               | Mediation analysis            | 0.01  | 0.09   | 0.25  |
| Cohen's f                                | Multiple Regression           | 0.14  | 0.39   | 0.59  |
| Cohen's d                                | t-tests                       | 0.2   | 0.5    | 0.8   |
| Cohen's $\omega$                         | chi-square                    | 0.1   | 0.3    | 0.5   |
| Odds Ratios                              | 2 by 2 tables                 | 1.5   | 3.5    | 9     |
| Odds Ratios                              | <a href="#">p vs 0.5</a>      | 0.55  | 0.65   | 0.75  |
| <a href="#">Average Spearman rho</a>     | Friedman test                 | 0.1   | 0.3    | 0.5   |

## STROBE Statement—Checklist of items that should be included in reports of cross-sectional studies

|                              | Item No | Recommendation                                                                                                                                                                       | Page/line numbers                 |
|------------------------------|---------|--------------------------------------------------------------------------------------------------------------------------------------------------------------------------------------|-----------------------------------|
| <b>Title and abstract</b>    | 1       | (a) Indicate the study's design with a commonly used term in the title or the abstract                                                                                               | 2/30                              |
|                              |         | (b) Provide in the abstract an informative and balanced summary of what was done and what was found                                                                                  | 2/28-47                           |
| <b>Introduction</b>          |         |                                                                                                                                                                                      |                                   |
| Background/rationale         | 2       | Explain the scientific background and rationale for the investigation being reported                                                                                                 | 3-4/67-84                         |
| Objectives                   | 3       | State specific objectives, including any prespecified hypotheses                                                                                                                     | 4/82-84                           |
| <b>Methods</b>               |         |                                                                                                                                                                                      |                                   |
| Study design                 | 4       | Present key elements of study design early in the paper                                                                                                                              | 4/89-100                          |
| Setting                      | 5       | Describe the setting, locations, and relevant dates, including periods of recruitment, exposure, follow-up, and data collection                                                      | 4/89-100                          |
| Participants                 | 6       | (a) Give the eligibility criteria, and the sources and methods of selection of participants                                                                                          | 4/95-102                          |
| Variables                    | 7       | Clearly define all outcomes, exposures, predictors, potential confounders, and effect modifiers. Give diagnostic criteria, if applicable                                             | 4-5/103-117                       |
| Data sources/<br>measurement | 8*      | For each variable of interest, give sources of data and details of methods of assessment (measurement). Describe comparability of assessment methods if there is more than one group | 4/89-93; 5/113-117                |
| Bias                         | 9       | Describe any efforts to address potential sources of bias                                                                                                                            | 4/89-91; 8/200-2017               |
| Study size                   | 10      | Explain how the study size was arrived at                                                                                                                                            | 4/89-91;<br>Supplementary 10      |
| Quantitative variables       | 11      | Explain how quantitative variables were handled in the analyses. If applicable, describe which groupings were chosen and why                                                         | 4-5/104-110;<br>5/113-117         |
| Statistical methods          | 12      | (a) Describe all statistical methods, including those used to control for confounding                                                                                                | 5-7/118-189                       |
|                              |         | (b) Describe any methods used to examine subgroups and interactions                                                                                                                  | 5/113-117; 7/186-189              |
|                              |         | (c) Explain how missing data were addressed                                                                                                                                          | 8/204-207;<br>Supplementary 7 & 8 |
|                              |         | (d) If applicable, describe analytical methods taking account of sampling strategy                                                                                                   | 5/120-123; 7/172-174; 7/186-189   |

|                          |     |                                                                                                                                                                                                              |                                                                         |
|--------------------------|-----|--------------------------------------------------------------------------------------------------------------------------------------------------------------------------------------------------------------|-------------------------------------------------------------------------|
|                          |     | (e) Describe any sensitivity analyses                                                                                                                                                                        | 8/204-205;<br>Supplementary 4b,<br>8                                    |
| <b>Results</b>           |     |                                                                                                                                                                                                              |                                                                         |
| Participants             | 13* | (a) Report numbers of individuals at each stage of study—eg numbers potentially eligible, examined for eligibility, confirmed eligible, included in the study, completing follow-up, and analysed            | 8/200-207;<br>Supplementary 7                                           |
|                          |     | (b) Give reasons for non-participation at each stage                                                                                                                                                         | 8/200-207;<br>Supplementary 7                                           |
|                          |     | (c) Consider use of a flow diagram                                                                                                                                                                           | Described using narrative text:<br>8/200-207; Table:<br>Supplementary 7 |
| Descriptive data         | 14* | (a) Give characteristics of study participants (eg demographic, clinical, social) and information on exposures and potential confounders                                                                     | Table 1                                                                 |
|                          |     | (b) Indicate number of participants with missing data for each variable of interest                                                                                                                          | 8/200-207; Table 1;<br>Supplementary 7                                  |
| Outcome data             | 15* | Report numbers of outcome events or summary measures                                                                                                                                                         | Table 1-3                                                               |
| Main results             | 16  | (a) Give unadjusted estimates and, if applicable, confounder-adjusted estimates and their precision (eg, 95% confidence interval). Make clear which confounders were adjusted for and why they were included | 8/209-273; Table 1-3                                                    |
|                          |     | (b) Report category boundaries when continuous variables were categorized                                                                                                                                    | 4/104-110                                                               |
|                          |     | (c) If relevant, consider translating estimates of relative risk into absolute risk for a meaningful time period                                                                                             | N/A                                                                     |
| Other analyses           | 17  | Report other analyses done—eg analyses of subgroups and interactions, and sensitivity analyses                                                                                                               | Supplementary 2,6,7,8,9,10                                              |
| <b>Discussion</b>        |     |                                                                                                                                                                                                              |                                                                         |
| Key results              | 18  | Summarise key results with reference to study objectives                                                                                                                                                     | 10-11/275-283                                                           |
| Limitations              | 19  | Discuss limitations of the study, taking into account sources of potential bias or imprecision. Discuss both direction and magnitude of any potential bias                                                   | 14/377-386                                                              |
| Interpretation           | 20  | Give a cautious overall interpretation of results considering objectives, limitations, multiplicity of analyses, results from similar studies, and other relevant evidence                                   | 11-15/296-417                                                           |
| Generalisability         | 21  | Discuss the generalisability (external validity) of the study results                                                                                                                                        | 11-13/296-370                                                           |
| <b>Other information</b> |     |                                                                                                                                                                                                              |                                                                         |
| Funding                  | 22  | Give the source of funding and the role of the funders for the present study and, if applicable, for the original study on which the present article is based                                                | 19/581-583                                                              |
