# Supplementary material for: Spatial-temporal trends and risk factors for undernutrition and obesity among children (<5 years) in South Africa, 2008–2017: findings from a nationally representative longitudinal panel survey
Source: PubMed Central journal article supplement (PMC7245449; doi:10.1136/bmjopen-2019-034476), 2020-04-08
Supplement: bmjopen-2019-034476supp001.pdf [file bmjopen-2019-034476supp001.pdf]

## Supplementary Material

## Supplementary 1: STROBE Statement—Checklist of items that should be included in reports of cross-sectional studies

|                          | Item No | Recommendation                                                                                                                                                                       | Page/line numbers               |
|--------------------------|---------|--------------------------------------------------------------------------------------------------------------------------------------------------------------------------------------|---------------------------------|
| Title and abstract       | 1       | (a) Indicate the study's design with a commonly used term in the title or the abstract                                                                                               | 2/30                            |
|                          |         | (b) Provide in the abstract an informative and balanced summary of what was done and what was found                                                                                  | 2/28-47                         |
| <b>Introduction</b>      |         |                                                                                                                                                                                      |                                 |
| Background/rationale     | 2       | Explain the scientific background and rationale for the investigation being reported                                                                                                 | 3-4/67-84                       |
| Objectives               | 3       | State specific objectives, including any prespecified hypotheses                                                                                                                     | 4/82-84                         |
| <b>Methods</b>           |         |                                                                                                                                                                                      |                                 |
| Study design             | 4       | Present key elements of study design early in the paper                                                                                                                              | 4/89-100                        |
| Setting                  | 5       | Describe the setting, locations, and relevant dates, including periods of recruitment, exposure, follow-up, and data collection                                                      | 4/89-100                        |
| Participants             | 6       | (a) Give the eligibility criteria, and the sources and methods of selection of participants                                                                                          | 4/95-102                        |
| Variables                | 7       | Clearly define all outcomes, exposures, predictors, potential confounders, and effect modifiers. Give diagnostic criteria, if applicable                                             | 4-5/103-117                     |
| Data sources/measurement | 8*      | For each variable of interest, give sources of data and details of methods of assessment (measurement). Describe comparability of assessment methods if there is more than one group | 4/89-93; 5/113-117              |
| Bias                     | 9       | Describe any efforts to address potential sources of bias                                                                                                                            | 4/89-91; 8/200-2017             |
| Study size               | 10      | Explain how the study size was arrived at                                                                                                                                            | 4/89-91; Supplementary 10       |
| Quantitative variables   | 11      | Explain how quantitative variables were handled in the analyses. If applicable, describe which groupings were chosen and why                                                         | 4-5/104-110; 5/113-117          |
| Statistical methods      | 12      | (a) Describe all statistical methods, including those used to control for confounding                                                                                                | 5-7/118-189                     |
|                          |         | (b) Describe any methods used to examine subgroups and interactions                                                                                                                  | 5/113-117; 7/186-189            |
|                          |         | (c) Explain how missing data were addressed                                                                                                                                          | 8/204-207; Supplementary 7 & 8  |
|                          |         | (d) If applicable, describe analytical methods taking account of sampling strategy                                                                                                   | 5/120-123; 7/172-174; 7/186-189 |

|                          |     |                                                                                                                                                                                                              |                                                                         |
|--------------------------|-----|--------------------------------------------------------------------------------------------------------------------------------------------------------------------------------------------------------------|-------------------------------------------------------------------------|
|                          |     | (e) Describe any sensitivity analyses                                                                                                                                                                        | 8/204-205;<br>Supplementary 4b,<br>8                                    |
| <b>Results</b>           |     |                                                                                                                                                                                                              |                                                                         |
| Participants             | 13* | (a) Report numbers of individuals at each stage of study—eg numbers potentially eligible, examined for eligibility, confirmed eligible, included in the study, completing follow-up, and analysed            | 8/200-207;<br>Supplementary 7                                           |
|                          |     | (b) Give reasons for non-participation at each stage                                                                                                                                                         | 8/200-207;<br>Supplementary 7                                           |
|                          |     | (c) Consider use of a flow diagram                                                                                                                                                                           | Described using narrative text:<br>8/200-207; Table:<br>Supplementary 7 |
| Descriptive data         | 14* | (a) Give characteristics of study participants (eg demographic, clinical, social) and information on exposures and potential confounders                                                                     | Table 1                                                                 |
|                          |     | (b) Indicate number of participants with missing data for each variable of interest                                                                                                                          | 8/200-207; Table 1;<br>Supplementary 7                                  |
| Outcome data             | 15* | Report numbers of outcome events or summary measures                                                                                                                                                         | Table 1-3                                                               |
| Main results             | 16  | (a) Give unadjusted estimates and, if applicable, confounder-adjusted estimates and their precision (eg, 95% confidence interval). Make clear which confounders were adjusted for and why they were included | 8/209-273; Table 1-3                                                    |
|                          |     | (b) Report category boundaries when continuous variables were categorized                                                                                                                                    | 4/104-110                                                               |
|                          |     | (c) If relevant, consider translating estimates of relative risk into absolute risk for a meaningful time period                                                                                             | N/A                                                                     |
| Other analyses           | 17  | Report other analyses done—eg analyses of subgroups and interactions, and sensitivity analyses                                                                                                               | Supplementary 2,6,7,8,9,10                                              |
| <b>Discussion</b>        |     |                                                                                                                                                                                                              |                                                                         |
| Key results              | 18  | Summarise key results with reference to study objectives                                                                                                                                                     | 10-11/275-283                                                           |
| Limitations              | 19  | Discuss limitations of the study, taking into account sources of potential bias or imprecision. Discuss both direction and magnitude of any potential bias                                                   | 14/377-386                                                              |
| Interpretation           | 20  | Give a cautious overall interpretation of results considering objectives, limitations, multiplicity of analyses, results from similar studies, and other relevant evidence                                   | 11-15/296-417                                                           |
| Generalisability         | 21  | Discuss the generalisability (external validity) of the study results                                                                                                                                        | 11-13/296-370                                                           |
| <b>Other information</b> |     |                                                                                                                                                                                                              |                                                                         |
| Funding                  | 22  | Give the source of funding and the role of the funders for the present study and, if applicable, for the original study on which the present article is based                                                | 19/581-583                                                              |

## Supplementary 2: Spatial autocorrelation analyses for the 3 anthropometric outcomes (univariate and bivariate)

### *Pairwise correlation for anthropometric outcomes and bivariate spatial autocorrelation*

We have performed additional supplementary analyses (using GeoDa: Anselin L, Syabri I, Kho Y. GeoDa: an introduction to spatial data analysis. Geographical analysis. 2006 Jan;38(1):5-22) which assesses pairwise correlation/association between the 3 outcomes as well as bivariate Moran's I to assess if there was significant spatial autocorrelation between the outcomes. This analysis suggests that there is no significant association between stunting and thinness/wasting while there is weak positive but significant spatial autocorrelation between stunting and obesity prevalence as well as weak negative spatial correlation between thinness and obesity (please see detailed analyses below).

```
. spearman stunted_svy thin_svy

Number of obs =      256
Spearman's rho =      0.0729

Test of Ho: stunted_svy and thin_svy are independent
      Prob > |t| =      0.2452

. gllamm stunted_svy thin_svy, i(id)

number of level 1 units = 256
number of level 2 units = 52

Condition Number = 14.594452

gllamm model

log likelihood = 283.93295

-----
stunted_svy |      Coef.   Std. Err.      z    P>|z|    [95% Conf. Interval]
-----+-----
      thin_svy |   .0385636   .0726234     0.53   0.595    -.1037757    .1809028
      _cons |   .1082981   .0061531    17.60   0.000    .0962381    .120358
-----

Variance at level 1
-----

      .00637033 (.00056306)

Variances and covariances of random effects
-----

***level 2 (id)

      var(1): 2.643e-24 (5.133e-14)
-----
```

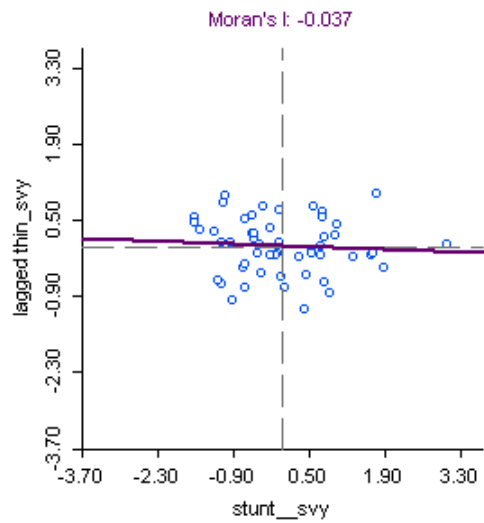

permutations: 99999  
pseudo p-value: 0.290100

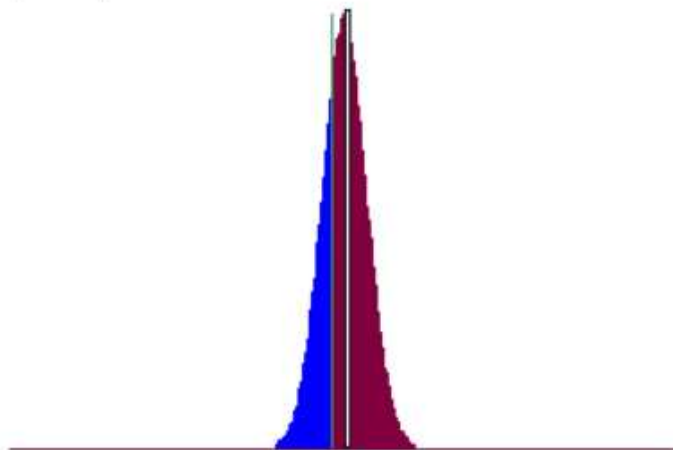

t: -0.0372 E[]: -0.0196 mean: 0.0007 sd: 0.0690 z-value: -0.5492

```
. spearman stunted_svy obese_svy
```

```
Number of obs =      256  
Spearman's rho =      0.2051
```

```
Test of Ho: stunted_svy and obese_svy are independent  
Prob > |t| =      0.0010
```

```
. gllamm stunted_svy obese_svy , i(id)
```

```
number of level 1 units = 256  
number of level 2 units = 52
```

```
Condition Number = 10.565877
```

```
gllamm model
```

```
log likelihood = 292.58012
```

```
-----+-----  
stunted_svy |      Coef.   Std. Err.      z    P>|z|     [95% Conf. Interval]  
-----+-----
```

```

obese_svy | .1980684 .0475478 4.17 0.000 .1048765 .2912604
_cons | .0791266 .0090305 8.76 0.000 .0614272 .0968261
-----

```

```

Variance at level 1
-----

```

```

.00580379 (.00057983)

```

```

Variances and covariances of random effects
-----

```

```

***level 2 (id)

```

```

var(1): .00015837 (.00029997)
-----

```

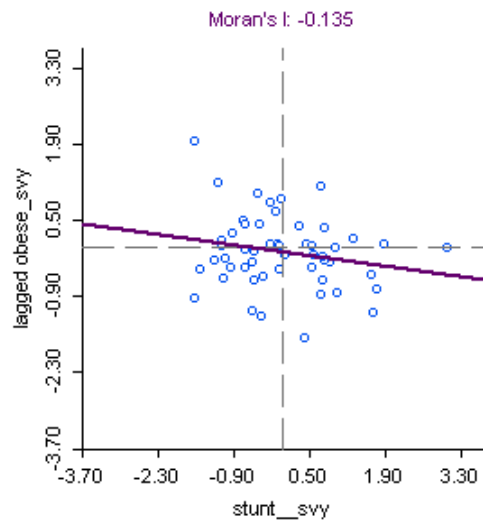

```

permutations: 99999

```

```

pseudo p-value: 0.025380

```

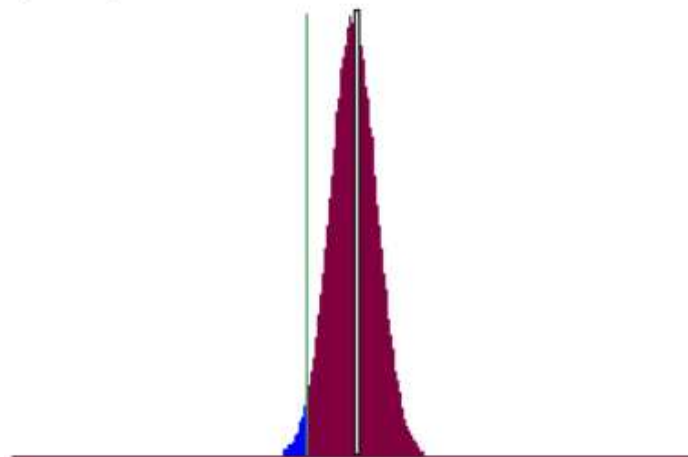

```

I: -0.1350 E[I]: -0.0196 mean: 0.0001 sd: 0.0689 z-value: -1.9600

```

```

. spearman thin_svy obese_svy

```

```

Number of obs = 256
Spearman's rho = -0.1424

```

```

Test of Ho: thin_svy and obese_svy are independent

```

```

Prob > |t| = 0.0227

. gllamm thin_svy obese_svy , i(id)

number of level 1 units = 256
number of level 2 units = 52

Condition Number = 10.976401

gllamm model

log likelihood = 324.36079

-----
thin_svy |      Coef.   Std. Err.      z    P>|z|     [95% Conf. Interval]
-----+-----
obese_svy | -.067802   .040258   -1.68  0.092   -.1467062   .0111022
  _cons | .0602269   .0078037    7.72   0.000   .0449319   .0755218
-----+-----

Variance at level 1
-----

.00447574 (.00044278)

Variances and covariances of random effects
-----

***level 2 (id)

var(1): .00018259 (.00023176)
-----

```

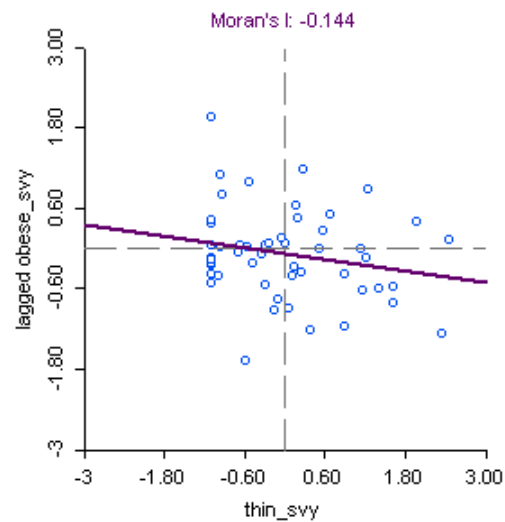

permutations: 99999  
 pseudo p-value: 0.020230

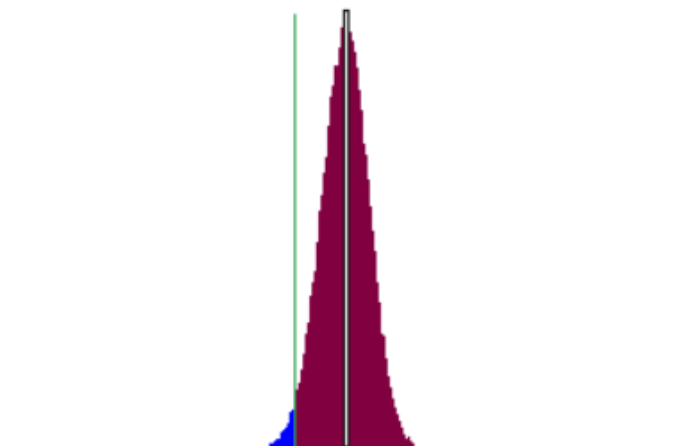

t: -0.1441 E[]: -0.0196 mean: 0.0057 sd: 0.0710 z-value: -2.1119

With regards to the shared temporal effect this we think can be retained as all 3 outcomes appear to have a negative coefficient associated with increasing panel or wave.

```
. gllamm stunted_svy year , i(id)
```

```
number of level 1 units = 256  

number of level 2 units = 52
```

```
Condition Number = 31.724715
```

```
gllamm model
```

```
log likelihood = 293.64743
```

| stunted_svy | Coef.            | Std. Err.       | z            | P> z         | [95% Conf. Interval]        |
|-------------|------------------|-----------------|--------------|--------------|-----------------------------|
| <b>year</b> | <b>-.0153423</b> | <b>.0033894</b> | <b>-4.53</b> | <b>0.000</b> | <b>-.0219855 - .0086992</b> |
| _cons       | .1563577         | .0112694        | 13.87        | 0.000        | .1342702 .1784453           |

```
Variance at level 1
```

```
.00590475 (.00052191)
```

```
Variances and covariances of random effects
```

```
***level 2 (id)
```

```
var(1): 8.887e-19 (4.854e-11)
```

```
. gllamm thin_svy year , i(id)
```

```
number of level 1 units = 256  

number of level 2 units = 52
```

```
Condition Number = 37.175479
```

```
gllamm model
```

```
log likelihood = 327.11892
```

```

thin_svy |      Coef.   Std. Err.      z    P>|z|     [95% Conf. Interval]
-----+-----
   year |  -.0084373  .0028941   -2.92  0.004   -.0141096   -.002765
   _cons |   .0749857   .0098979    7.58   0.000    .0555862    .0943852
-----+-----

```

Variance at level 1

```
.00430301 (.00042507)
```

Variances and covariances of random effects

\*\*\*level 2 (id)

```
var(1): .00027197 (.0002388)
```

```
. gllamm obese_svy year , i(id)
```

```
number of level 1 units = 256
```

```
number of level 2 units = 52
```

```
Condition Number = 21.597249
```

```
gllamm model
```

```
log likelihood = 215.4003
```

```

obese_svy |      Coef.   Std. Err.      z    P>|z|     [95% Conf. Interval]
-----+-----
   year |  -.0112194  .0043125   -2.60  0.009   -.0196717  -.0027671
   _cons |   .1905201   .0155017   12.29   0.000    .1601374    .2209029
-----+-----

```

Variance at level 1

```
.00954712 (.00094327)
```

Variances and covariances of random effects

\*\*\*level 2 (id)

```
var(1): .00175973 (.00074487)
```

### *Univariate spatial autocorrelation*

Based on the univariate Moran's I statistics for each anthropometric outcome there appeared to be significant spatial heterogeneity present for all 3 outcomes.



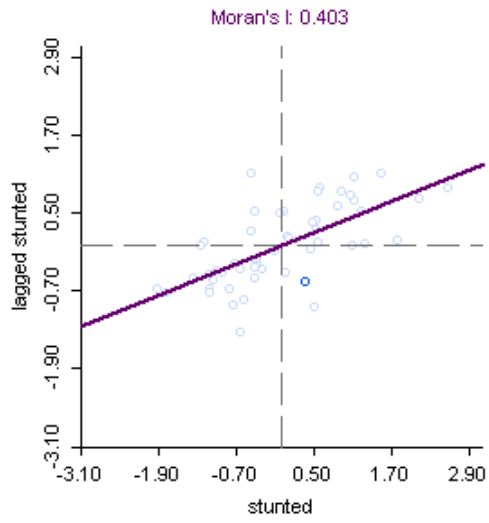

permutations: 99999  
 pseudo p-value: 0.000020

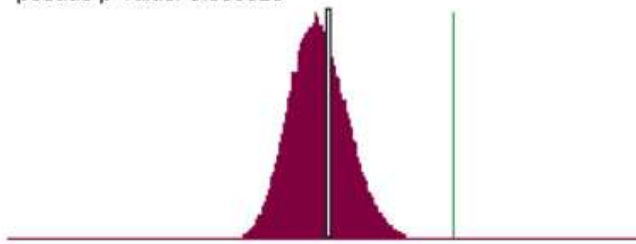

I: 0.4027 E[I]: -0.0196 mean: -0.0202 sd: 0.0923 z-value: 4.5834

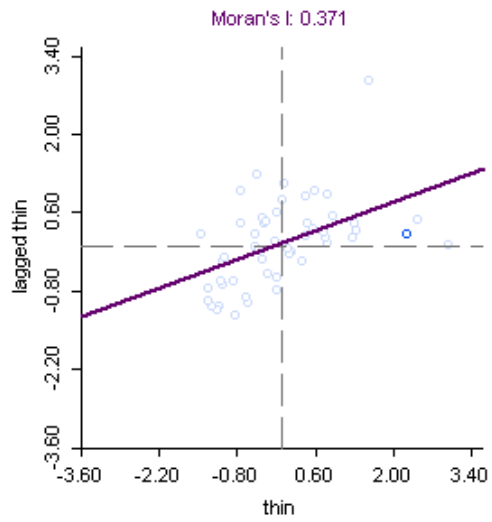

permutations: 99999  
pseudo p-value: 0.000130

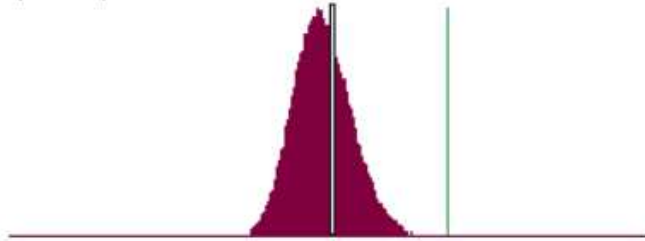

I: 0.3707 E[I]: -0.0196 mean: -0.0196 sd: 0.0916 z-value: 4.2602

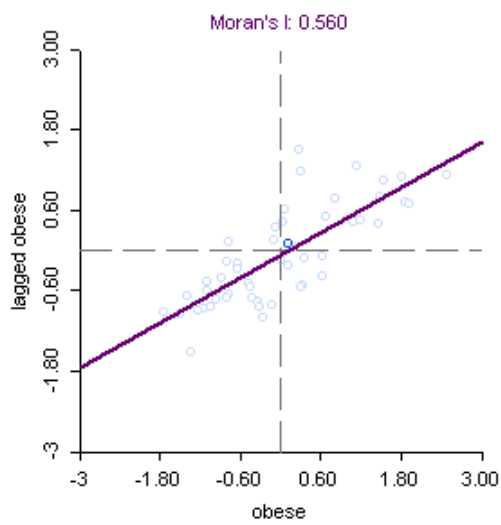

permutations: 99999  
pseudo p-value: 0.000010

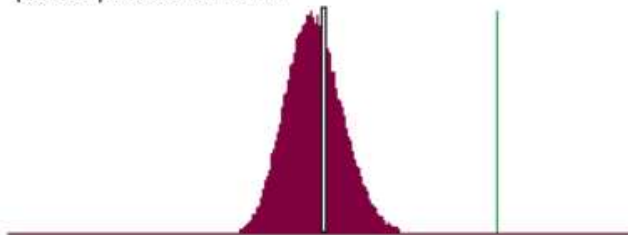

I: 0.5600 E[I]: -0.0196 mean: -0.0198 sd: 0.0918 z-value: 6.3149

**Supplementary 3: Win BUGS code for Bayesian space-time binomial model**

```

model
{
  for( i in 1 : N ) {
    for( j in 1 : T ) {
      #Likelihood

      stunted[i,j] ~ dbin(p1[i,j],child[i,j])
      logit(p1[i,j])<-alpha1+phi1[i]+gamma1[j]+nu1[i,j]

      thin[i,j] ~ dbin(p2[i,j],child[i,j])
      logit(p2[i,j])<-alpha2+phi2[i]+gamma2[j]+nu2[i,j]
      exceedance2[i,j]<-step(p2[i,j]-0.05) # reduce and maintain wasting to <5%

      obese[i,j] ~ dbin(p3[i,j],child[i,j])
      logit(p3[i,j])<-alpha3+phi3[i]+gamma3[j]+nu3[i,j]
    }
    exceedance1[i,5]<-step((1-p1[i,5]/p1[i,3])-0.17) #17% is target reduction by 2017 from 2012
                                                    # assuming target 40% reduction by 2025
    exceedance3[i,5]<-step(p3[i,5]/p3[i,3]-1) # no increase in obesity from 2012 to 2017
  }

  # - Space
  phi1[1:52]~car.normal(adj[],weights[],num[],tau.phi[1])
  phi2[1:52]~car.normal(adj[],weights[],num[],tau.phi[2])
  phi3[1:52]~car.normal(adj[],weights[],num[],tau.phi[3])

  for(k in 1:240) {weights[k]<-1}

  # - Time:

  gamma1[1:T]~car.normal(adj.t[],weights.t[],num.t[],tau.gamma[1])
  gamma2[1:T]~car.normal(adj.t[],weights.t[],num.t[],tau.gamma[2])
  gamma3[1:T]~car.normal(adj.t[],weights.t[],num.t[],tau.gamma[3])

  for(t in 1:1) {
    weights.t[t] <- 1;
    adj.t[t] <- t+1;
    num.t[t] <- 1
  }
  for(t in 2:(T-1)) {
    weights.t[2+(t-2)*2] <- 1;
    adj.t[2+(t-2)*2] <- t-1
    weights.t[3+(t-2)*2] <- 1;
    adj.t[3+(t-2)*2] <- t+1;
    num.t[t] <- 2
  }
  for(t in T:T) {
    weights.t[(T-2)*2 + 2] <- 1;
    adj.t[(T-2)*2 + 2] <- t-1;
    num.t[t] <- 1
  }

  #Space-time Interaction terms
  for(i in 1:N){
    for(j in 1:T){
      nu1[i,j]~dnorm(0, tau.nu[1])
      nu2[i,j]~dnorm(0, tau.nu[2])
      nu3[i,j]~dnorm(0, tau.nu[3])
    }
  }
}

```

```
    }  
  }  
  
  #Hyperprior specification  
  
  for(i in 1:3){  
    tau.phi[i]~dgamma(0.5, 0.0005)  
    tau.gamma[i]~dgamma(0.5, 0.0005)  
    tau.nu[i]~dgamma(0.5, 0.0005)  
  }  
  
  alpha1~dflat()  
  alpha2~dflat()  
  alpha3~dflat()  
  
  }  
}
```

Supplementary 4: a) Model random effects posteriors and b) sensitivity analysis of hyper parameter selection

selection

a)

Spatial random effects ( $\phi$ )

Stunting

Thinness/wasting

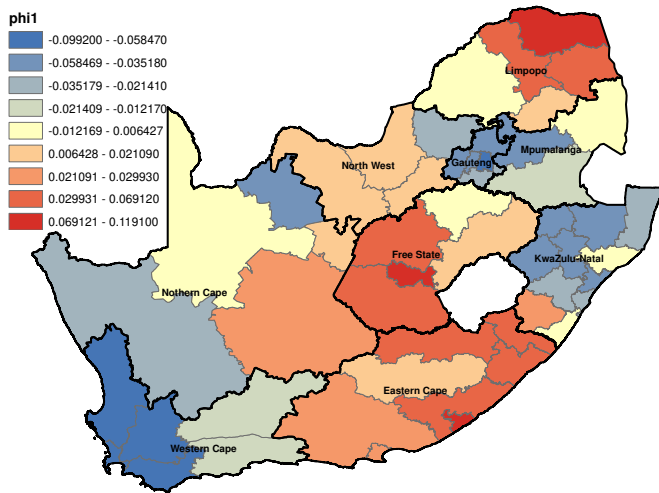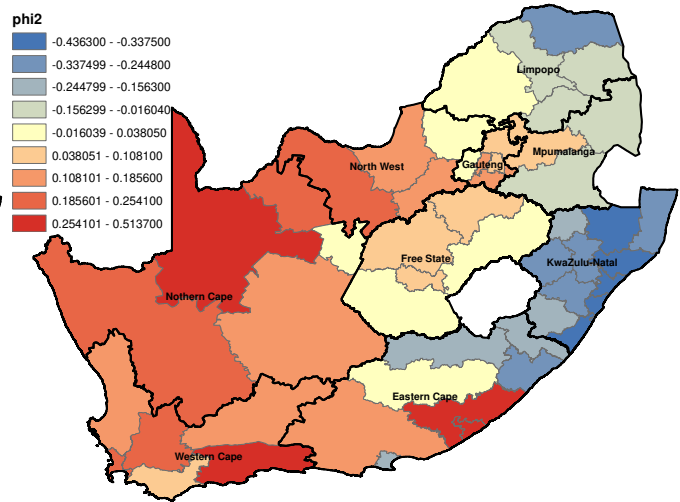

Obesity

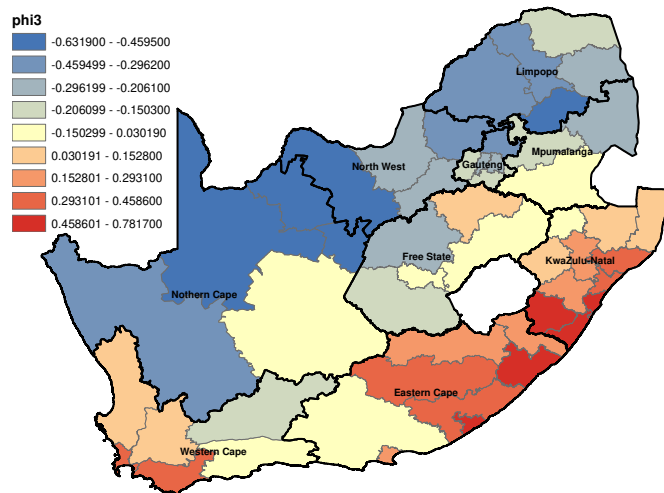

Unstructured effects (2017) (*nu*)

Stunting

Thinness/wasting

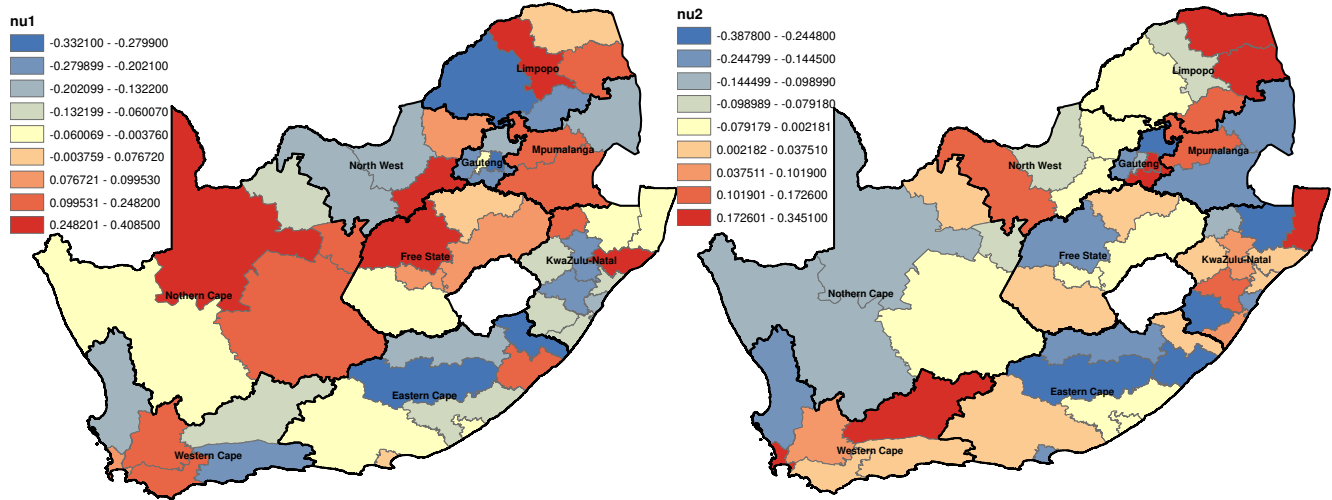

Obesity

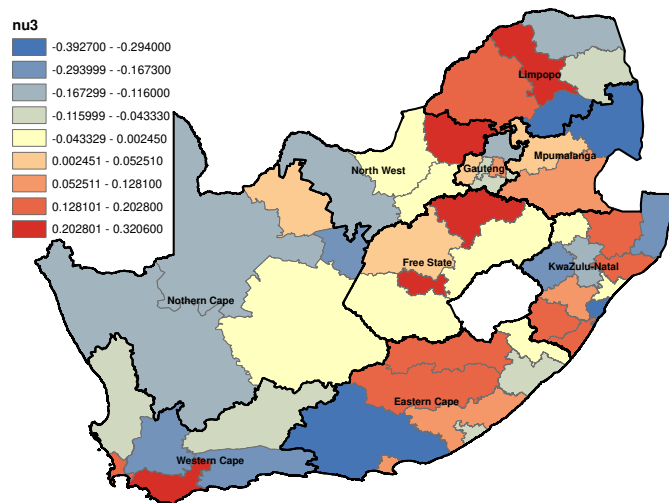

*Temporal random effects (gamma)*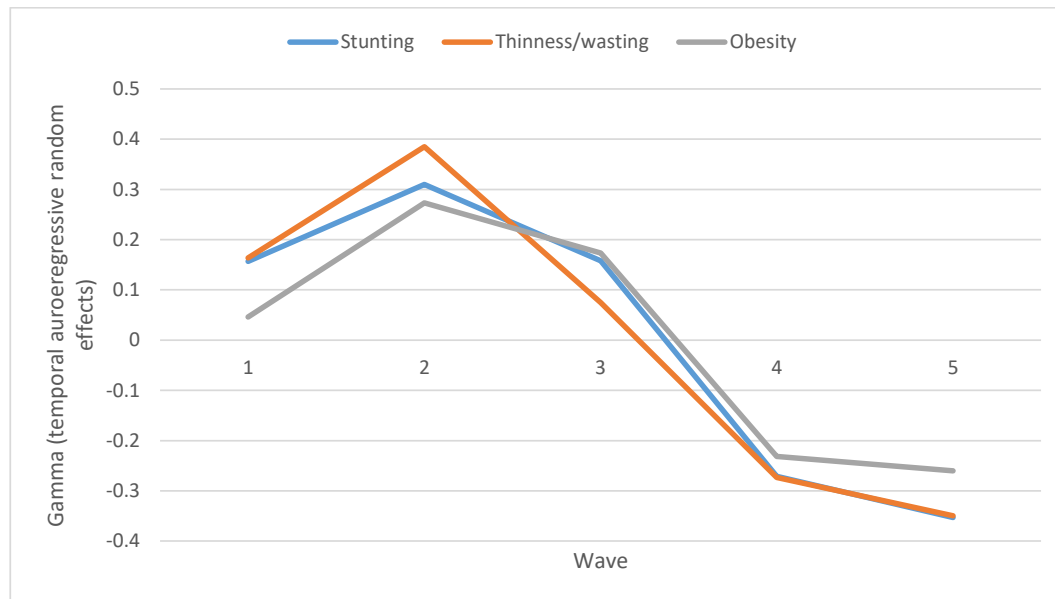

b)

We concluded an additional sensitivity analysis to confirm whether the choice of hyper parameter may have affected the prevalence estimates. For the variance parameters, namely  $\sigma^2_v$ ,  $\sigma^2_\phi$ ,  $\sigma^2_\gamma$  we assumed Gamma(0.5,0.0005) distributions as recommended by Wakefield (Wakefield J, Best N, Waller L. Bayesian approaches to disease mapping. *Spatial epidemiology: methods and applications* 2000:104-07.) for the Bayesian prevalence/exceedance probability estimates presented in the main text. We also tested whether changes to this prior may have affected the estimates. Other choices for this prior (Lawson A, Browne W, Vidal Rodeiro C. *Disease Mapping with WinBUGS and MLWin*. Chichester: John Wiley & Sons; 2003) that are commonly used include.

Gamma (0.001, 0.001)

Gamma (0.01,0.01)

Pairwise scatterplots of the posterior prevalence for the various gamma distribution choices for the hyper parameters below suggest that the model estimates were largely insensitive to the choice of distribution assumed:

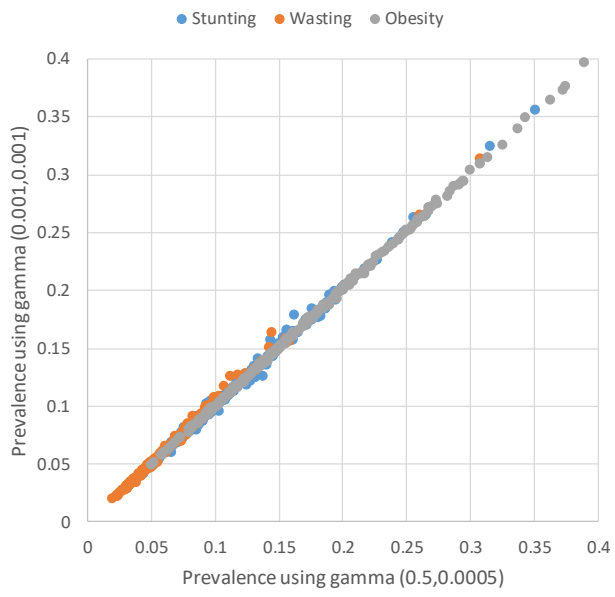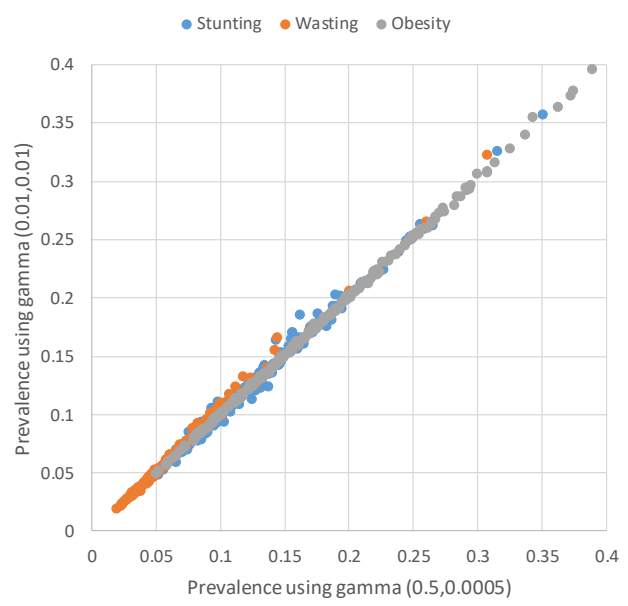



## Supplementary 5: a) Model convergence [Gelman-Rubin statistics/plots]

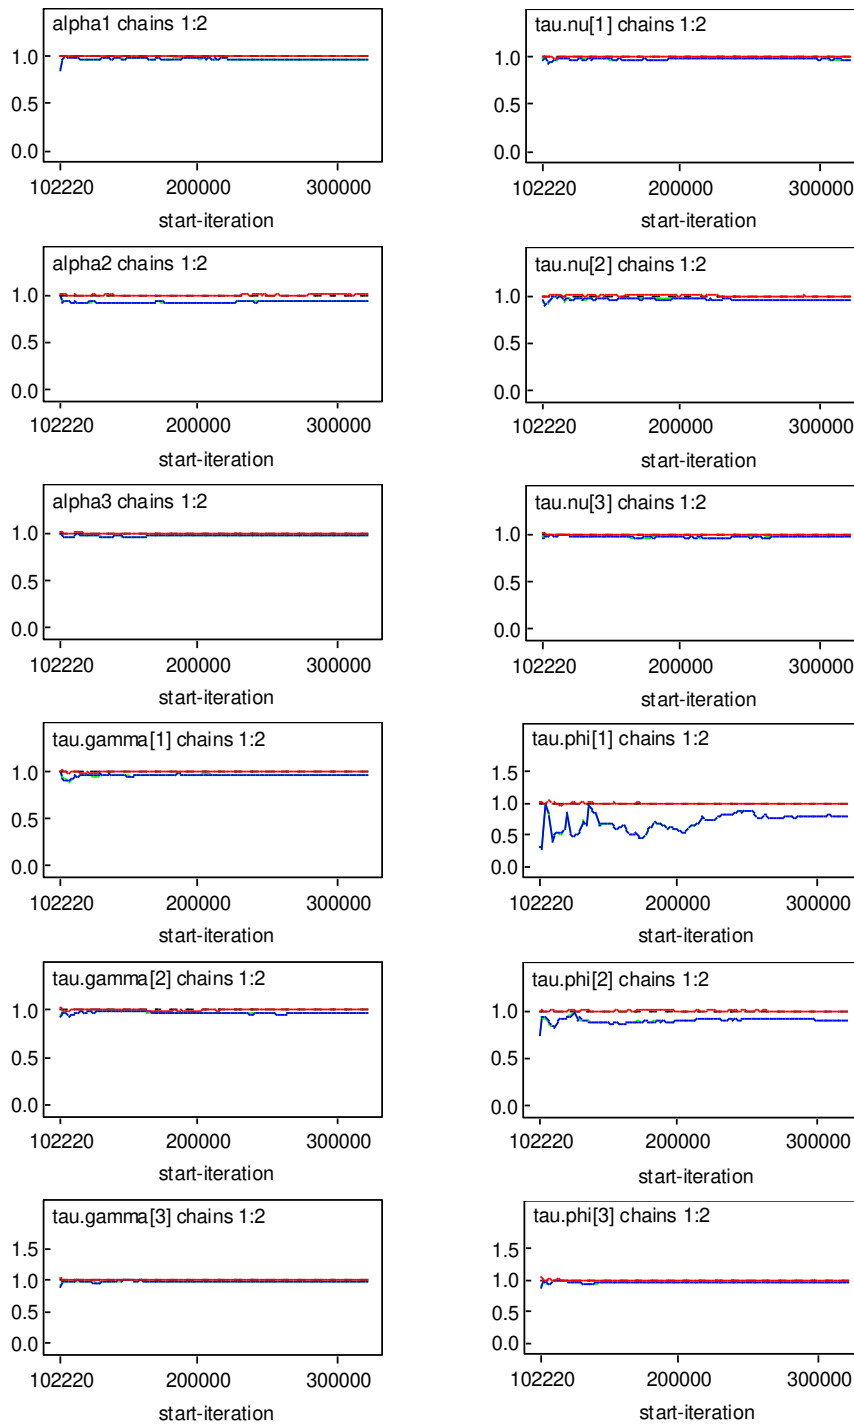

### Supplementary 6: Model fit and out of sample validation

#### Overall model fit

**Dbar = post.mean of -2logL; Dhat = -2LogL at post.mean of stochastic nodes**

|         | Dbar     | Dhat     | pD      | DIC      |
|---------|----------|----------|---------|----------|
| obese   | 1110.400 | 969.250  | 141.149 | 1251.550 |
| stunted | 1036.090 | 910.101  | 125.987 | 1162.080 |
| thin    | 695.343  | 602.042  | 93.301  | 788.643  |
| total   | 2841.830 | 2481.390 | 360.437 | 3202.270 |

#### Comparison of survey prevalence versus model fitted prevalence by anthropometric measure

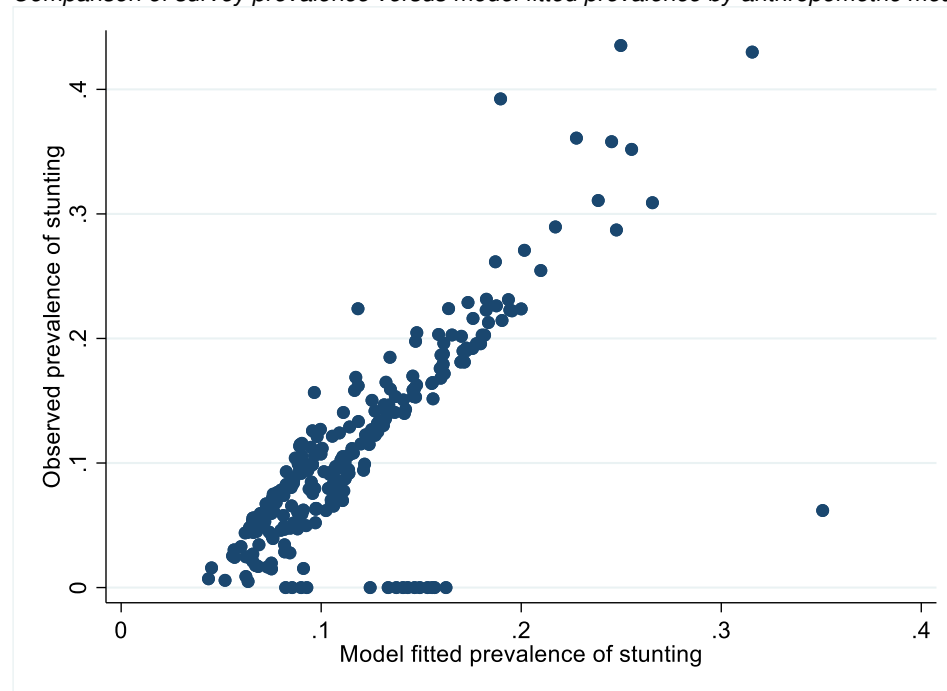

```
. spearman stunted_svy p1 if stunted_svy~=0
```

```
Number of obs =      241
Spearman's rho =      0.9190
```

```
Test of Ho: stunted_svy and p1 are independent
Prob > |t| =      0.0000
```

```
. spearman stunted_svy p1
```

```
Number of obs =      256
Spearman's rho =      0.7729
```

```
Test of Ho: stunted_svy and p1 are independent
Prob > |t| =      0.0000
```

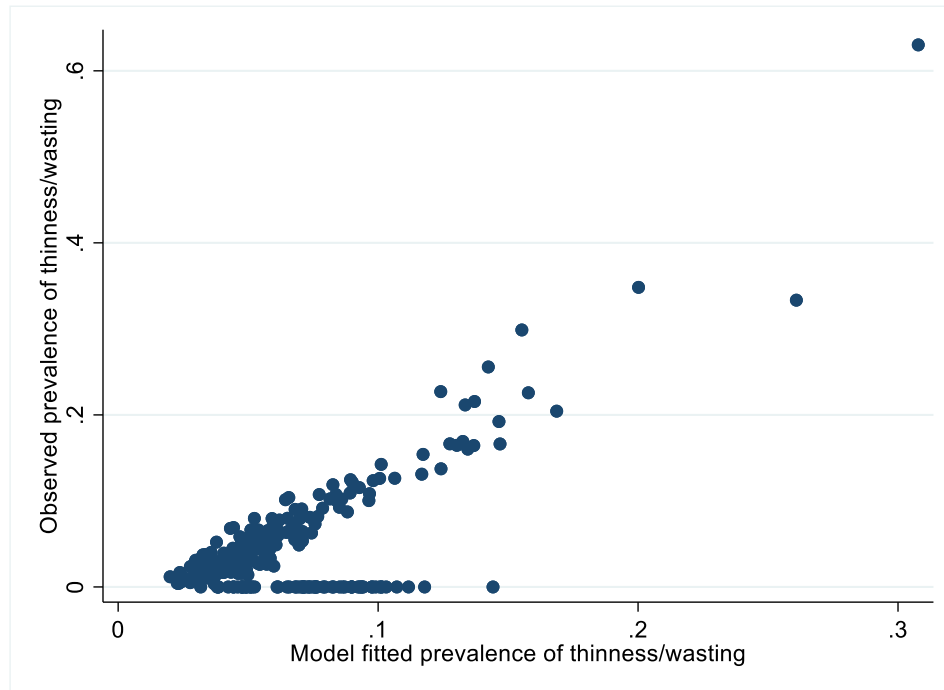

```
. spearman thin_svy p2 if thin_svy~=0

Number of obs =      191
Spearman's rho =      0.9019

Test of Ho: thin_svy and p2 are independent
    Prob > |t| =      0.0000

. spearman thin_svy p2

Number of obs =      256
Spearman's rho =      0.2972

Test of Ho: thin_svy and p2 are independent
    Prob > |t| =      0.0000
```

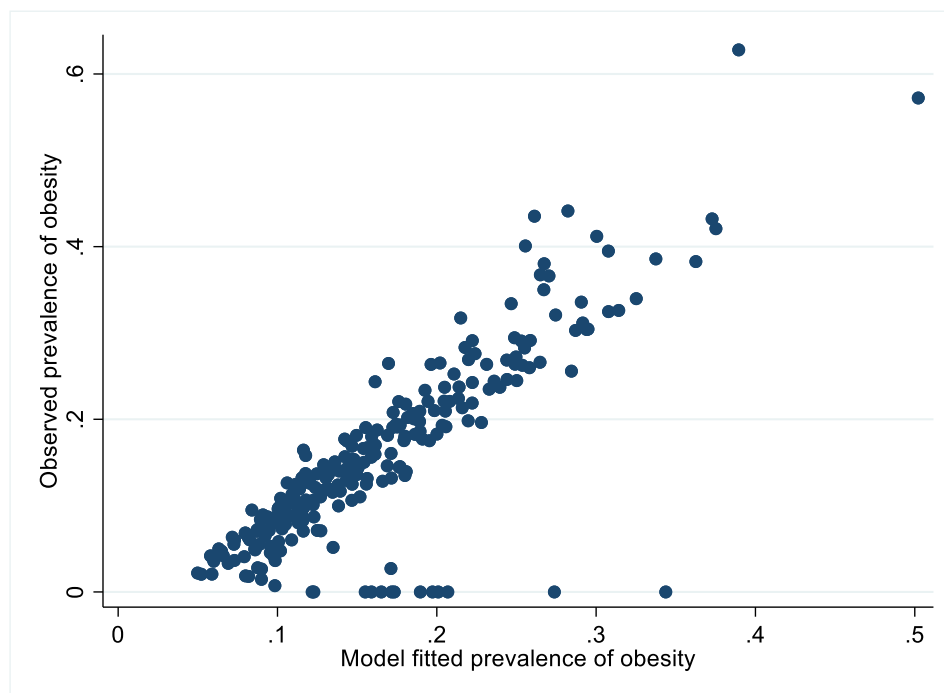

```
. spearman obese_svy p3 if obese_svy~=0

Number of obs =      243
Spearman's rho =      0.9485

Test of Ho: obese_svy and p3 are independent
Prob > |t| =          0.0000

. spearman obese_svy p3

Number of obs =      256
Spearman's rho =      0.8179

Test of Ho: obese_svy and p3 are independent
Prob > |t| =          0.0000
```

#### Out of sample validation/prediction (10% random sample)

Of the 37 out of sample validation points, 31 (or 84%) of the observed prevalence of stunting were within the 95% uncertainty interval for the predicted posterior prevalence, 28/37 (78%) for thinness/wasting and 31/37 (84%) for obesity.

| id | wave | District                   | Prov         | Stunted (observed) | Thin/wasted (observed) | Obese (observed) | Stunted (posterior) | 95% BCI |        | Thin/wasted (posterior) | 95% BCI |        | Obese (posterior) | 95% BCI |        |
|----|------|----------------------------|--------------|--------------------|------------------------|------------------|---------------------|---------|--------|-------------------------|---------|--------|-------------------|---------|--------|
| 3  | 4    | City of Tshwane (TSH)      | Gauteng      | 0.01584            | 0.028309               | 0.03565          | 0.09138             | 0.0344  | 0.1911 | 0.05339                 | 0.01411 | 0.1343 | 0.1104            | 0.04251 | 0.226  |
| 4  | 1    | City of Johannesburg (JHB) | Gauteng      | 0.075611           | 0.015782               | 0.187624         | 0.1285              | 0.05006 | 0.26   | 0.08426                 | 0.0217  | 0.2094 | 0.1389            | 0.05482 | 0.2789 |
| 5  | 1    | Buffalo City (BUF)         | Eastern Cape | 0.392359           | 0.255737               | 0.255737         | 0.1366              | 0.04961 | 0.2864 | 0.105                   | 0.02015 | 0.3356 | 0.3173            | 0.1231  | 0.5788 |
| 8  | 3    | Cacadu (DC10)              | Eastern Cape | 0.063566           | 0.063563               | 0.071285         | 0.1308              | 0.05085 | 0.261  | 0.07077                 | 0.01873 | 0.1759 | 0.1926            | 0.07914 | 0.3611 |
| 9  | 5    | Amathole (DC12)            | Eastern Cape | 0.034391           | 0.048998               | 0.263574         | 0.08987             | 0.03286 | 0.1895 | 0.0618                  | 0.01346 | 0.1731 | 0.1882            | 0.07342 | 0.363  |
| 12 | 1    | O.R.Tambo (DC15)           | Eastern Cape | 0.222196           | 0.015888               | 0.246151         | 0.138               | 0.05288 | 0.2758 | 0.06349                 | 0.01635 | 0.1665 | 0.2552            | 0.111   | 0.4522 |
| 13 | 3    | Xhariep (DC16)             | Free State   | 0.052021           | 0.022786               | 0.086915         | 0.1352              | 0.0517  | 0.2722 | 0.06617                 | 0.01758 | 0.1673 | 0.1631            | 0.06518 | 0.3172 |
| 14 | 4    | Lejweleputswa (DC18)       | Free State   | 0.164856           | 0.059159               | 0.08698          | 0.09708             | 0.0363  | 0.2027 | 0.0539                  | 0.01409 | 0.1363 | 0.1095            | 0.04191 | 0.2254 |
| 15 | 3    | Thabo Mofutsanyane (DC19)  | Free State   | 0.228885           | 0.030611               | 0.106143         | 0.1284              | 0.04956 | 0.2567 | 0.06452                 | 0.0173  | 0.1614 | 0.1861            | 0.07662 | 0.353  |

|    |   |                                  |               |          |          |          |         |         |        |         |          |         |         |         |        |
|----|---|----------------------------------|---------------|----------|----------|----------|---------|---------|--------|---------|----------|---------|---------|---------|--------|
| 16 | 5 | Cape Winelands (DC2)             | Western Cape  | 0.125904 | 0.065507 | 0.089544 | 0.08173 | 0.02978 | 0.176  | 0.05496 | 0.01371  | 0.1417  | 0.1369  | 0.05382 | 0.2708 |
| 19 | 3 | UMgungundlovu (DC22)             | KwaZulu-Natal | 0.133616 | 0.107423 | 0.213388 | 0.1224  | 0.0468  | 0.2492 | 0.05064 | 0.01301  | 0.136   | 0.2251  | 0.0955  | 0.4095 |
| 20 | 3 | Uthukela (DC23)                  | KwaZulu-Natal | 0.140663 | 0.029259 | 0.244155 | 0.1202  | 0.04537 | 0.2464 | 0.05216 | 0.01372  | 0.1382  | 0.1857  | 0.07645 | 0.3524 |
| 21 | 5 | Umzinyathi (DC24)                | KwaZulu-Natal | 0.045311 | 0.037798 | 0.117828 | 0.08302 | 0.03081 | 0.1783 | 0.03554 | 0.008943 | 0.09847 | 0.1524  | 0.05855 | 0.3055 |
| 23 | 4 | Zululand (DC26)                  | KwaZulu-Natal | 0.082797 | 0.026059 | 0.193396 | 0.08843 | 0.03282 | 0.1885 | 0.03922 | 0.009809 | 0.1077  | 0.1404  | 0.0551  | 0.2804 |
| 25 | 3 | Uthungulu (DC28)                 | KwaZulu-Natal | 0.178442 | 0.022595 | 0.239129 | 0.1247  | 0.04783 | 0.251  | 0.0497  | 0.01282  | 0.1345  | 0.2337  | 0.09804 | 0.4257 |
| 26 | 3 | iLembe (DC29)                    | KwaZulu-Natal | 0.196082 | 0.045007 | 0.198271 | 0.1188  | 0.04489 | 0.2454 | 0.04939 | 0.01221  | 0.1343  | 0.2598  | 0.1132  | 0.4611 |
| 27 | 4 | Overberg (DC3)                   | Western Cape  | 0.044303 | 0.006543 | 0.22102  | 0.08827 | 0.03194 | 0.1892 | 0.05854 | 0.01459  | 0.1527  | 0.1828  | 0.07273 | 0.3521 |
| 28 | 1 | Gert Sibande (DC30)              | Mpumalanga    | 0.039364 | 0.016922 | 0.087611 | 0.1301  | 0.05057 | 0.2615 | 0.06794 | 0.0188   | 0.1708  | 0.1692  | 0.06952 | 0.3252 |
| 28 | 3 | Gert Sibande (DC30)              | Mpumalanga    | 0.13142  | 0.169157 | 0.242636 | 0.126   | 0.04846 | 0.252  | 0.05976 | 0.01619  | 0.1517  | 0.1798  | 0.07408 | 0.3441 |
| 30 | 2 | Ehlanzeni (DC32)                 | Mpumalanga    | 0.082747 | 0.049337 | 0.118953 | 0.1462  | 0.05729 | 0.2896 | 0.07806 | 0.02038  | 0.2002  | 0.1458  | 0.05572 | 0.2908 |
| 30 | 3 | Ehlanzeni (DC32)                 | Mpumalanga    | 0.308996 | 0.102135 | 0.263661 | 0.1244  | 0.04733 | 0.252  | 0.05775 | 0.01508  | 0.1496  | 0.1336  | 0.05113 | 0.2685 |
| 32 | 4 | Vhembe (DC34)                    | Limpopo       | 0.159305 | 0.005527 | 0.060438 | 0.1034  | 0.03696 | 0.2201 | 0.04615 | 0.01114  | 0.1254  | 0.127   | 0.04623 | 0.2623 |
| 33 | 4 | Capricorn (DC35)                 | Limpopo       | 0.098606 | 0.024444 | 0.137144 | 0.09882 | 0.0363  | 0.2066 | 0.05008 | 0.0131   | 0.1289  | 0.09301 | 0.0339  | 0.198  |
| 35 | 1 | Bojanala (DC37)                  | North West    | 0.061806 | 0.026407 | 0.041916 | 0.1308  | 0.05145 | 0.2631 | 0.07596 | 0.01993  | 0.1909  | 0.1472  | 0.05754 | 0.2922 |
| 35 | 3 | Bojanala (DC37)                  | North West    | 0.051943 | 0.050775 | 0.07316  | 0.127   | 0.0494  | 0.2549 | 0.06689 | 0.01764  | 0.1705  | 0.1567  | 0.06121 | 0.3078 |
| 36 | 4 | Ngaka Modiri Molema (DC38)       | North West    | 0.098734 | 0.085696 | 0.112994 | 0.09498 | 0.03531 | 0.1977 | 0.05315 | 0.01375  | 0.1366  | 0.1163  | 0.04431 | 0.2389 |
| 37 | 4 | Dr Ruth Segomotsi Mompati (DC39) | North West    | 0.074933 | 0.081794 | 0.020508 | 0.09534 | 0.03553 | 0.199  | 0.05775 | 0.01489  | 0.1462  | 0.09674 | 0.03614 | 0.2034 |
| 40 | 1 | Sedibeng (DC42)                  | Gauteng       | 0.202795 | 0.225723 | 0.106432 | 0.1281  | 0.04987 | 0.26   | 0.07473 | 0.02019  | 0.1852  | 0.1554  | 0.06286 | 0.3048 |
| 40 | 2 | Sedibeng (DC42)                  | Gauteng       | 0.152953 | 0.100409 | 0.132566 | 0.1455  | 0.05777 | 0.2879 | 0.08836 | 0.02332  | 0.2164  | 0.1801  | 0.07327 | 0.3438 |
| 41 | 4 | Sisonke (DC43)                   | KwaZulu-Natal | 0.058274 | 0.010655 | 0.058335 | 0.09652 | 0.03541 | 0.2031 | 0.04685 | 0.01187  | 0.123   | 0.2282  | 0.09509 | 0.4207 |
| 42 | 5 | Alfred Nzo (DC44)                | Eastern Cape  | 0.020967 | 0.040195 | 0.143771 | 0.09156 | 0.03377 | 0.1927 | 0.03907 | 0.009915 | 0.1059  | 0.1643  | 0.06519 | 0.3221 |
| 45 | 1 | West Rand (DC48)                 | Gauteng       | 0.085192 | 0.124663 | 0.07049  | 0.1293  | 0.05015 | 0.2589 | 0.07178 | 0.01918  | 0.1799  | 0.1645  | 0.06532 | 0.3235 |
| 46 | 5 | Central Karoo (DC5)              | Western Cape  | 0.059525 | 0.10142  | 0.080496 | 0.08649 | 0.0322  | 0.1821 | 0.05009 | 0.01282  | 0.1309  | 0.1124  | 0.04168 | 0.2323 |
| 51 | 1 | Ekurhuleni (EKU)                 | Gauteng       | 0.146754 | 0.026242 | 0.026557 | 0.1237  | 0.04661 | 0.2538 | 0.07674 | 0.02017  | 0.1912  | 0.1587  | 0.06215 | 0.3162 |
| 51 | 4 | Ekurhuleni (EKU)                 | Gauteng       | 0.007073 | 0.079849 | 0.08599  | 0.08755 | 0.03179 | 0.1863 | 0.05287 | 0.01372  | 0.1358  | 0.1248  | 0.0475  | 0.2561 |
| 52 | 4 | eThekweni (ETH)                  | KwaZulu-Natal | 0.141696 | 0.011844 | 0.311557 | 0.08787 | 0.03228 | 0.1884 | 0.03885 | 0.009519 | 0.1088  | 0.196   | 0.07941 | 0.3735 |
| 52 | 5 | eThekweni (ETH)                  | KwaZulu-Natal | 0.055993 | 0.016832 | 0.124759 | 0.08245 | 0.03015 | 0.1764 | 0.0343  | 0.008309 | 0.09693 | 0.1901  | 0.07589 | 0.3647 |

```
. spearman stunted_svy stuntedvpost if validation_sample2==1
```

```
Number of obs =      37
Spearman's rho =      0.4445
```

```
Test of Ho: stunted_svy and stuntedvpost are independent
Prob > |t| =      0.0058
```

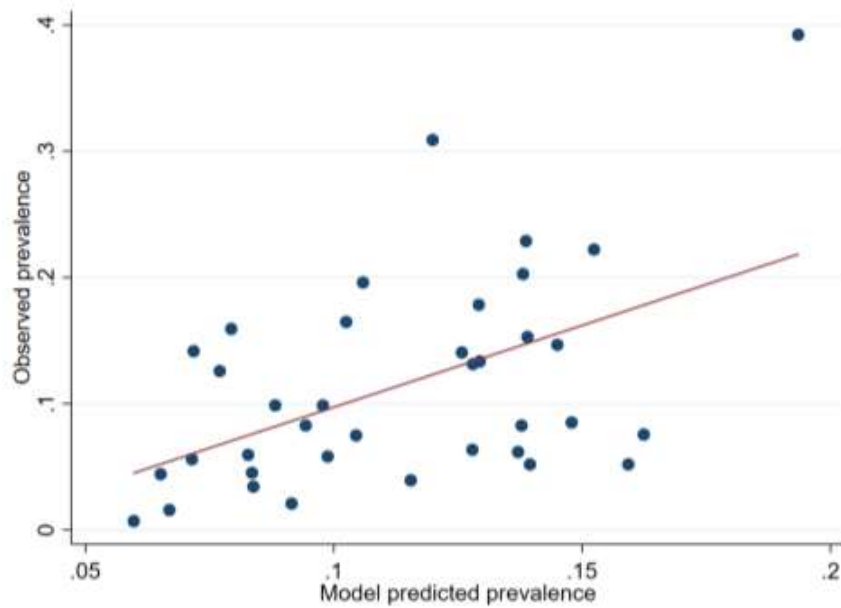

```
. spearman thin_svy thinvpost if validation_sample2==1
```

```
Number of obs =      37
Spearman's rho =      0.2048
```

```
Test of Ho: thin_svy and thinvpost are independent
Prob > |t| =          0.2239
```

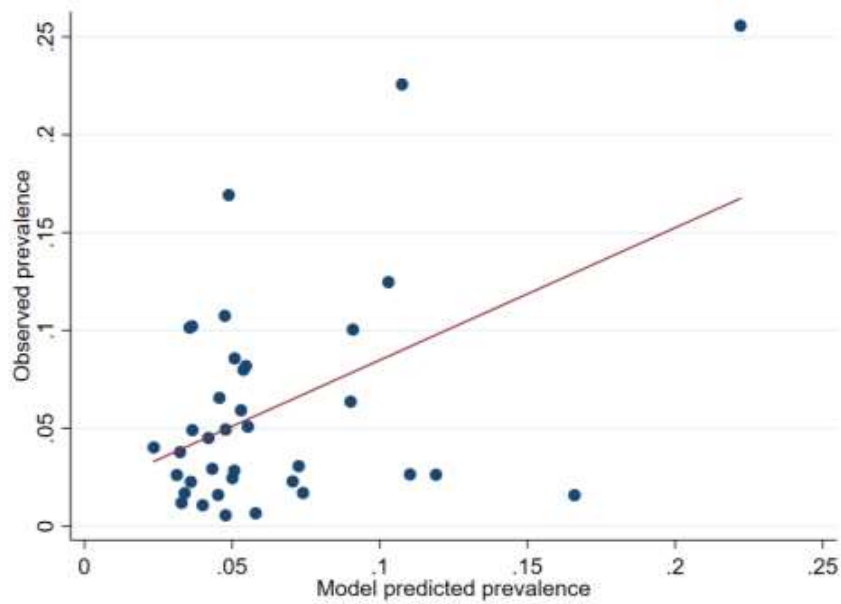

```
. spearman thin_svy thinvpost if validation_sample2==1 & thin_svy~=0
```

```
Number of obs =      37
Spearman's rho =      0.2048
```

```
Test of Ho: thin_svy and thinvpost are independent
Prob > |t| =          0.2239
```

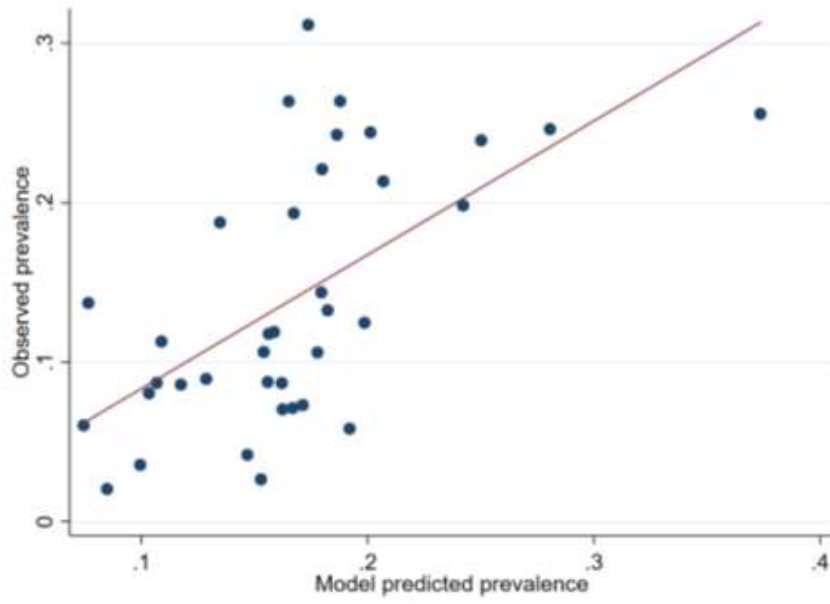

## Supplementary 7: Description of the study sample across survey rounds

| Survey wave    | Age (in years) | Sampled | Estimated population size using survey weights | 95% CI  |         | % sampled with height/weight measurement |
|----------------|----------------|---------|------------------------------------------------|---------|---------|------------------------------------------|
| <b>2008</b>    | 0              | 661     | 1092027                                        | 948199  | 1235854 | 35.9%                                    |
|                | 1              | 661     | 1151665                                        | 1009086 | 1294244 | 67.9%                                    |
|                | 2              | 670     | 1088458                                        | 960285  | 1216632 | 71.0%                                    |
|                | 3              | 642     | 1034244                                        | 902011  | 1166477 | 81.0%                                    |
|                | 4              | 620     | 1016227                                        | 882185  | 1150270 | 83.5%                                    |
|                | <5             | 3254    | 5382621                                        | 5005478 | 5759764 |                                          |
| <b>2010/11</b> | 0              | 517     | 866786                                         | 720440  | 1013132 | 16.2%                                    |
|                | 1              | 621     | 1032184                                        | 840129  | 1224239 | 42.5%                                    |
|                | 2              | 751     | 1225419                                        | 1040085 | 1410753 | 49.3%                                    |
|                | 3              | 840     | 1206389                                        | 1026681 | 1386097 | 53.3%                                    |
|                | 4              | 820     | 1196800                                        | 1031500 | 1362101 | 53.3%                                    |
|                | <5             | 3549    | 5527578                                        | 4914106 | 6141050 |                                          |
| <b>2012</b>    | 0              | 652     | 902357                                         | 777704  | 1027010 | 45.1%                                    |
|                | 1              | 691     | 1039354                                        | 887868  | 1190839 | 87.7%                                    |
|                | 2              | 764     | 1183609                                        | 995508  | 1371711 | 87.6%                                    |
|                | 3              | 826     | 1257820                                        | 1036042 | 1479598 | 89.6%                                    |
|                | 4              | 909     | 1405034                                        | 1191438 | 1618631 | 87.3%                                    |
|                | <5             | 3842    | 5788174                                        | 5112765 | 6463583 |                                          |
| <b>2014/15</b> | 0              | 886     | 1185863                                        | 1003941 | 1367786 | 50.3%                                    |
|                | 1              | 875     | 1162949                                        | 985828  | 1340070 | 92.9%                                    |
|                | 2              | 863     | 1060232                                        | 901257  | 1219207 | 92.7%                                    |
|                | 3              | 914     | 1160946                                        | 985127  | 1336765 | 94.0%                                    |
|                | 4              | 960     | 1298110                                        | 1098342 | 1497879 | 94.3%                                    |
|                | <5             | 4498    | 5868101                                        | 5200170 | 6536031 |                                          |
| <b>2017</b>    | 0              | 813     | 987763                                         | 841487  | 1134040 | 47.8%                                    |
|                | 1              | 909     | 1215360                                        | 1045099 | 1385622 | 86.4%                                    |
|                | 2              | 996     | 1293408                                        | 1105038 | 1481779 | 84.6%                                    |
|                | 3              | 992     | 1264427                                        | 1088783 | 1440071 | 88.9%                                    |
|                | 4              | 1000    | 1129184                                        | 973431  | 1284937 | 90.4%                                    |
|                | <5             | 4710    | 5890142                                        | 5261158 | 6519126 |                                          |



### Supplementary 8: Sensitivity analyses for missing weight and height

Summary: A comparison of missing weight/height proportions by various socio-demographic variables suggests that many were likely missing at random. Distributions of race, gender, household income, low birthweight, food security status, mother education category and father education category were not significantly different when comparing children with missing weight/height measurements to those with a valid weight/height measurement (please see analysis output below). However, age did significantly differ by missing status in that infants (<1 year of age) were significantly more likely to have a missing weight/height measurement compared to children aged 1-4 years. There also appeared to be significant differences in missing weight/height status by province of residence i.e. children in Mpumalanga, Western Cape for example had higher proportions of missing weight/height measurements among children under 5 ( $p < 0.001$ ). Furthermore, missing weight/height measurements for children were more significantly more likely among those children with younger mothers (<25 years of age).

```
. svy: tab race_ missing_height_weight if race_~=0, row ci
(running tabulate on estimation sample)
```

```
Number of strata =      53          Number of obs   =    16,649
Number of PSUs   =    1,076       Population size = 25,331,414
                                           Design df      =     1,023
```

| race_    | missing_height_weight   |                         | Total |
|----------|-------------------------|-------------------------|-------|
|          | 0                       | 1                       |       |
| African  | .8129<br>[.8006, .8246] | .1871<br>[.1754, .1994] | 1     |
| Coloured | .7803<br>[.7437, .8129] | .2197<br>[.1871, .2563] | 1     |
| Asian/In | .7593<br>[.5708, .882]  | .2407<br>[.118, .4292]  | 1     |
| White    | .74<br>[.643, .8182]    | .26<br>[.1818, .357]    | 1     |
| Total    | .8066<br>[.7945, .8181] | .1934<br>[.1819, .2055] | 1     |

```
Key: row proportion
     [95% confidence interval for row proportion]
```

```
Pearson:
Uncorrected chi2(3) = 32.5162
Design-based F(2.49, 2551.53) = 1.7810 P = 0.1588
```

```
. svy: tab gender_ missing_height_weight if race_~=0, row ci
(running tabulate on estimation sample)
```

```
Number of strata =      53          Number of obs   =    19,138
Number of PSUs   =    1,218       Population size = 28,354,881
                                           Design df      =     1,165
```

| gender_ | missing_height_weight   |                         | Total |
|---------|-------------------------|-------------------------|-------|
|         | 0                       | 1                       |       |
| Male    | .8065<br>[.7926, .8196] | .1935<br>[.1804, .2074] | 1     |
| Female  | .8102<br>[.7951, .8245] | .1898<br>[.1755, .2049] | 1     |
| Total   | .8083<br>[.7972, .819]  | .1917<br>[.181, .2028]  | 1     |

```
Key: row proportion
     [95% confidence interval for row proportion]
```

```
Pearson:
Uncorrected chi2(1) = 0.4400
Design-based F(1, 1165) = 0.1697 P = 0.6805
```

```
. svy: tab age_ missing_height_weight, row ci
(running tabulate on estimation sample)
```

```
Number of strata =      53          Number of obs   =    19,201
Number of PSUs   =    1,227        Population size = 28,456,616
                                           Design df     =     1,174
```

| age_  | missing_height_weight  |                        | Total |
|-------|------------------------|------------------------|-------|
|       | 0                      | 1                      |       |
| 0     | .4596<br>[.4362,.4832] | .5404<br>[.5168,.5638] | 1     |
| 1     | .8581<br>[.8308,.8816] | .1419<br>[.1184,.1692] | 1     |
| 2     | .8764<br>[.8573,.8933] | .1236<br>[.1067,.1427] | 1     |
| 3     | .8952<br>[.8726,.9142] | .1048<br>[.0858,.1274] | 1     |
| 4     | .9015<br>[.8847,.916]  | .0985<br>[.084,.1153]  | 1     |
| Total | .8083<br>[.7972,.8189] | .1917<br>[.1811,.2028] | 1     |

```
Key: row proportion
     [95% confidence interval for row proportion]
```

```
Pearson:
Uncorrected chi2(4) = 3267.7805
Design-based F(3.41, 3999.27) = 238.9174 P = 0.0000
```

```
. svy: tab hh_inc missing_height_weight, row ci
(running tabulate on estimation sample)
```

```
Number of strata =      53          Number of obs   =    18,289
Number of PSUs   =    1,195        Population size = 26,887,499
                                           Design df     =     1,142
```

| hh_inc | missing_height_weight  |                        | Total |
|--------|------------------------|------------------------|-------|
|        | 0                      | 1                      |       |
| 1      | .8032<br>[.7792,.8251] | .1968<br>[.1749,.2208] | 1     |
| 2      | .8286<br>[.8012,.853]  | .1714<br>[.147,.1988]  | 1     |
| 3      | .8289<br>[.8084,.8475] | .1711<br>[.1525,.1916] | 1     |
| 4      | .8076<br>[.7751,.8365] | .1924<br>[.1635,.2249] | 1     |
| 5      | .7862<br>[.7578,.812]  | .2138<br>[.188,.2422]  | 1     |
| Total  | .8096<br>[.7982,.8205] | .1904<br>[.1795,.2018] | 1     |

```
Key: row proportion
     [95% confidence interval for row proportion]
```

```
Pearson:
Uncorrected chi2(4) = 32.2620
Design-based F(3.67, 4186.36) = 1.9756 P = 0.1017
```

```
. svy: tab province missing_height_weight, row ci
(running tabulate on estimation sample)
```

```
Number of strata =      53          Number of obs   =    19,201
Number of PSUs   =    1,227        Population size = 28,456,616
```

Design df = 1,174

| province | missing_height_weight   |                         | Total |
|----------|-------------------------|-------------------------|-------|
|          | 0                       | 1                       |       |
| Eastern  | .8421<br>[.819, .8627]  | .1579<br>[.1373, .181]  | 1     |
| Free Sta | .833<br>[.7968, .8638]  | .167<br>[.1362, .2032]  | 1     |
| Gauteng  | .7866<br>[.7637, .8078] | .2134<br>[.1922, .2363] | 1     |
| KwaZulu- | .8448<br>[.8255, .8624] | .1552<br>[.1376, .1745] | 1     |
| Limpopo  | .8422<br>[.8184, .8634] | .1578<br>[.1366, .1816] | 1     |
| Mpumalan | .7557<br>[.7187, .7892] | .2443<br>[.2108, .2813] | 1     |
| North We | .8011<br>[.7725, .827]  | .1989<br>[.173, .2275]  | 1     |
| Northern | .7921<br>[.7674, .8149] | .2079<br>[.1851, .2326] | 1     |
| Western  | .7422<br>[.7064, .775]  | .2578<br>[.225, .2936]  | 1     |
| Total    | .8083<br>[.7972, .8189] | .1917<br>[.1811, .2028] | 1     |

Key: row proportion  
[95% confidence interval for row proportion]

Pearson:  
Uncorrected chi2(8) = 171.9467  
Design-based F(6.89, 8090.45) = 9.8218 P = 0.0000

. svy: tab LBW missing\_height\_weight, row ci  
(running tabulate on estimation sample)

Number of strata = 53                      Number of obs = 16,606  
Number of PSUs = 1,128                  Population size = 24,829,511  
Design df = 1,075

| LBW   | missing_height_weight   |                         | Total |
|-------|-------------------------|-------------------------|-------|
|       | 0                       | 1                       |       |
| 0     | .8164<br>[.8044, .8278] | .1836<br>[.1722, .1956] | 1     |
| 1     | .8106<br>[.7788, .8388] | .1894<br>[.1612, .2212] | 1     |
| Total | .8158<br>[.8045, .8266] | .1842<br>[.1734, .1955] | 1     |

Key: row proportion  
[95% confidence interval for row proportion]

Pearson:  
Uncorrected chi2(1) = 0.3369  
Design-based F(1, 1075) = 0.1307 P = 0.7178

. svy: tab foodsecurity\_proxy missing\_height\_weight, row ci  
(running tabulate on estimation sample)

Number of strata = 53                      Number of obs = 5,017  
Number of PSUs = 438                      Population size = 8,843,019  
Design df = 385

```

-----
foodsecur |          missing_height_weight
ity_proxy |          0          1          Total
-----+-----
1 |          .7719          .2281          1
  | [ .7467, .7952] [ .2048, .2533]
  |
2 |          .8019          .1981          1
  | [ .7352, .8551] [ .1449, .2648]
  |
3 |          .7596          .2404          1
  | [ .6983, .8119] [ .1881, .3017]
  |
4 |          .8284          .1716          1
  | [ .7561, .8825] [ .1175, .2439]
  |
5 |          .7869          .2131          1
  | [ .6923, .8583] [ .1417, .3077]
  |
Total |          .7751          .2249          1
  | [ .753, .7959] [ .2041, .247]
-----

```

Key: row proportion  
[95% confidence interval for row proportion]

Pearson:  
Uncorrected chi2(4) = 6.4682  
Design-based F(3.04, 1168.67) = 0.8267 P = 0.4803

. svy: tab mthagegrp missing\_height\_weight, row ci  
(running tabulate on estimation sample)

```

Number of strata =          53          Number of obs =          17,335
Number of PSUs  =          1,192        Population size =        26,432,345
                                          Design df      =          1,139

```

```

-----
RECODE of |          missing_height_weight
mth_age_f |          0          1          Total
inal      |-----+-----
1 |          .6691          .3309          1
  | [ .628, .7077] [ .2923, .372]
  |
2 |          .7787          .2213          1
  | [ .7553, .8004] [ .1996, .2447]
  |
3 |          .8128          .1872          1
  | [ .7961, .8285] [ .1715, .2039]
  |
4 |          .8329          .1671          1
  | [ .8096, .8539] [ .1461, .1904]
  |
5 |          .8629          .1371          1
  | [ .7939, .9113] [ .0887, .2061]
  |
Total |          .8006          .1994          1
  | [ .7894, .8115] [ .1885, .2106]
-----

```

Key: row proportion  
[95% confidence interval for row proportion]

Pearson:  
Uncorrected chi2(4) = 169.4906  
Design-based F(3.89, 4436.22) = 15.6564 P = 0.0000

. svy: tab mth\_edu2 missing\_height\_weight, row ci  
(running tabulate on estimation sample)

```

Number of strata =          53          Number of obs =          16,352
Number of PSUs  =          1,169        Population size =        25,254,660
                                          Design df      =          1,116

```

```

-----
|          missing_height_weight
mth_edu2 |          0          1          Total
-----+-----

```

|       |  |               |               |   |
|-------|--|---------------|---------------|---|
| 0     |  | .8043         | .1957         | 1 |
|       |  | [.7537,.8466] | [.1534,.2463] |   |
| 1     |  | .7848         | .2152         | 1 |
|       |  | [.7529,.8136] | [.1864,.2471] |   |
| 2     |  | .7976         | .2024         | 1 |
|       |  | [.7848,.8098] | [.1902,.2152] |   |
| 3     |  | .8122         | .1878         | 1 |
|       |  | [.7734,.8457] | [.1543,.2266] |   |
| Total |  | .7982         | .2018         | 1 |
|       |  | [.7868,.8092] | [.1908,.2132] |   |

Key: row proportion  
[95% confidence interval for row proportion]

Pearson:  
Uncorrected chi2(3) = 3.7648  
Design-based F(2.41, 2688.60) = 0.5454 P = 0.6124

. svy: tab fth\_educat missing\_height\_weight, row ci  
(running tabulate on estimation sample)

|                  |   |     |                 |   |           |
|------------------|---|-----|-----------------|---|-----------|
| Number of strata | = | 53  | Number of obs   | = | 4,574     |
| Number of PSUs   | = | 755 | Population size | = | 8,485,206 |
|                  |   |     | Design df       | = | 702       |

| fth_educat | missing_height_weight |               | Total         |   |
|------------|-----------------------|---------------|---------------|---|
|            | 0                     | 1             |               |   |
| 0          |                       | .9417         | .0583         | 1 |
|            |                       | [.732,.9896]  | [.0104,.268]  |   |
| 1          |                       | .7923         | .2077         | 1 |
|            |                       | [.7634,.8185] | [.1815,.2366] |   |
| 2          |                       | .803          | .197          | 1 |
|            |                       | [.759,.8406]  | [.1594,.241]  |   |
| 3          |                       | .7618         | .2382         | 1 |
|            |                       | [.6661,.8368] | [.1632,.3339] |   |
| Total      |                       | .7948         | .2052         | 1 |
|            |                       | [.7719,.8159] | [.1841,.2281] |   |

Key: row proportion  
[95% confidence interval for row proportion]

Pearson:  
Uncorrected chi2(3) = 3.8826  
Design-based F(2.17, 1522.03) = 0.5250 P = 0.6062

**Supplementary 9: Full posterior prevalence estimates with 95% Bayesian uncertainty intervals (UIs) by district and year. Also includes exceedance probabilities for 17% reduction in stunting from wave 3 (2012) to wave 5 (2017) - to achieve 40% reduction from 2012 to 2025, 5% target threshold for wasting prevalence and no increase in obesity from wave 3 (2012) to wave 5 (2017) as per 2025 nutritional targets.**

| Province      | District                         | wave | stunting | 95% UI |       | Exceedance probability 17% reduction from wave 3 to 5 | thinness | 95% UI |       | Exceedance probability 5% target threshold | obesity | 95% UI |       | Exceedance probability - no increase from wave 3 to 5 |
|---------------|----------------------------------|------|----------|--------|-------|-------------------------------------------------------|----------|--------|-------|--------------------------------------------|---------|--------|-------|-------------------------------------------------------|
|               |                                  |      |          |        |       |                                                       |          |        |       |                                            |         |        |       |                                                       |
| Eastern Cape  | Alfred Nzo(DC44 )                | 1    | 9.2%     | 4.4%   | 16.1% | N/A                                                   | 6.1%     | 2.3%   | 12.1% | 0.6223                                     | 16.9%   | 9.3%   | 26.2% | N/A                                                   |
| KwaZulu-Natal | Amajuba(DC25 )                   | 1    | 9.7%     | 5.1%   | 15.7% | N/A                                                   | 5.1%     | 2.1%   | 9.8%  | 0.4572                                     | 16.1%   | 9.8%   | 24.0% | N/A                                                   |
| Eastern Cape  | Amathole(DC12 )                  | 1    | 14.8%    | 6.4%   | 27.4% | N/A                                                   | 12.4%    | 3.9%   | 26.8% | 0.9399                                     | 28.2%   | 14.4%  | 46.2% | N/A                                                   |
| North West    | Bojanala(DC37 )                  | 1    | 10.2%    | 4.6%   | 18.4% | N/A                                                   | 5.7%     | 1.9%   | 12.3% | 0.5349                                     | 9.7%    | 4.3%   | 17.7% | N/A                                                   |
| Eastern Cape  | Buffalo City(BUF )               | 1    | 19.0%    | 8.3%   | 35.1% | N/A                                                   | 14.2%    | 4.0%   | 33.4% | 0.9435                                     | 28.5%   | 13.0%  | 48.8% | N/A                                                   |
| Eastern Cape  | Cacadu(DC10 )                    | 1    | 21.7%    | 12.9%  | 32.5% | N/A                                                   | 8.0%     | 2.2%   | 19.8% | 0.7199                                     | 18.2%   | 10.3%  | 28.0% | N/A                                                   |
| Western Cape  | Cape Winelands(DC2 )             | 1    | 12.5%    | 4.7%   | 25.8% | N/A                                                   | 9.7%     | 4.4%   | 17.1% | 0.9475                                     | 18.7%   | 10.8%  | 28.3% | N/A                                                   |
| Limpopo       | Capricorn(DC35 )                 | 1    | 12.4%    | 6.5%   | 20.6% | N/A                                                   | 10.1%    | 4.6%   | 18.2% | 0.9578                                     | 12.2%   | 4.6%   | 25.1% | N/A                                                   |
| Western Cape  | Central Karoo(DC5 )              | 1    | 16.0%    | 9.0%   | 24.9% | N/A                                                   | 7.6%     | 3.2%   | 14.3% | 0.8194                                     | 13.9%   | 7.6%   | 22.2% | N/A                                                   |
| Eastern Cape  | Chris Hani(DC13 )                | 1    | 9.7%     | 4.7%   | 17.0% | N/A                                                   | 7.4%     | 2.1%   | 18.3% | 0.6688                                     | 27.5%   | 17.5%  | 38.9% | N/A                                                   |
| Western Cape  | City of Cape Town(CPT )          | 1    | 8.1%     | 4.0%   | 13.8% | N/A                                                   | 9.0%     | 2.4%   | 21.6% | 0.7817                                     | 15.6%   | 8.9%   | 24.0% | N/A                                                   |
| Gauteng       | City of Johannesburg(JHB )       | 1    | 9.6%     | 4.8%   | 15.9% | N/A                                                   | 4.6%     | 1.6%   | 9.4%  | 0.3591                                     | 16.3%   | 9.5%   | 24.7% | N/A                                                   |
| Gauteng       | City of Tshwane(TSH )            | 1    | 18.3%    | 11.1%  | 27.2% | N/A                                                   | 12.8%    | 6.5%   | 20.8% | 0.9967                                     | 9.5%    | 4.9%   | 15.8% | N/A                                                   |
| North West    | Dr Kenneth Kaunda(DC40 )         | 1    | 13.4%    | 6.5%   | 23.0% | N/A                                                   | 13.4%    | 5.8%   | 24.4% | 0.9898                                     | 14.7%   | 7.2%   | 25.0% | N/A                                                   |
| North West    | Dr Ruth Segomotsi Mompati(DC39 ) | 1    | 11.2%    | 6.4%   | 17.5% | N/A                                                   | 13.5%    | 7.5%   | 20.9% | 0.9997                                     | 10.0%   | 5.5%   | 15.9% | N/A                                                   |
| Western Cape  | Eden(DC4 )                       | 1    | 13.7%    | 6.8%   | 23.5% | N/A                                                   | 9.8%     | 2.5%   | 25.0% | 0.81                                       | 21.8%   | 12.0%  | 34.2% | N/A                                                   |
| Mpumalanga    | Ehlanzeni(DC32 )                 | 1    | 10.7%    | 5.7%   | 17.3% | N/A                                                   | 4.0%     | 1.5%   | 8.0%  | 0.2425                                     | 8.9%    | 4.6%   | 14.9% | N/A                                                   |
| Gauteng       | Ekurhuleni(EKU )                 | 1    | 13.2%    | 6.5%   | 22.0% | N/A                                                   | 5.5%     | 1.9%   | 11.3% | 0.5078                                     | 9.0%    | 4.0%   | 16.2% | N/A                                                   |
| Free State    | Fezile Dabi(DC20 )               | 1    | 12.7%    | 5.8%   | 23.0% | N/A                                                   | 7.6%     | 2.0%   | 19.2% | 0.692                                      | 25.6%   | 13.8%  | 40.1% | N/A                                                   |
| Northern Cape | Frances Baard(DC9 )              | 1    | 13.2%    | 7.4%   | 20.7% | N/A                                                   | 5.6%     | 2.3%   | 10.6% | 0.5542                                     | 8.9%    | 4.5%   | 15.1% | N/A                                                   |
| Mpumalanga    | Gert Sibande(DC30 )              | 1    | 7.6%     | 3.8%   | 13.0% | N/A                                                   | 4.1%     | 1.5%   | 8.2%  | 0.2558                                     | 11.5%   | 6.4%   | 18.1% | N/A                                                   |
| Limpopo       | Greater Sekhukhune(DC47 )        | 1    | 14.6%    | 8.1%   | 22.9% | N/A                                                   | 7.9%     | 3.5%   | 14.3% | 0.8598                                     | 7.3%    | 3.4%   | 12.9% | N/A                                                   |
| Eastern Cape  | Joe Gqabi(DC14 )                 | 1    | 12.8%    | 6.8%   | 21.0% | N/A                                                   | 4.6%     | 1.7%   | 9.6%  | 0.3627                                     | 18.6%   | 10.9%  | 28.4% | N/A                                                   |
| Northern Cape | John Taolo Gaetsewe(DC45 )       | 1    | 8.4%     | 3.7%   | 15.3% | N/A                                                   | 6.0%     | 2.1%   | 12.5% | 0.5885                                     | 11.5%   | 5.6%   | 20.0% | N/A                                                   |
| Free State    | Lejweleputswa(DC18 )             | 1    | 11.1%    | 5.0%   | 19.7% | N/A                                                   | 7.0%     | 2.5%   | 14.6% | 0.714                                      | 9.9%    | 4.4%   | 17.8% | N/A                                                   |
| Free State    | Mangaung(MAN )                   | 1    | 35.1%    | 21.0%  | 51.4% | N/A                                                   | 7.6%     | 2.0%   | 19.6% | 0.6713                                     | 16.5%   | 6.3%   | 33.5% | N/A                                                   |
| Limpopo       | Mopani(DC33 )                    | 1    | 8.2%     | 3.8%   | 14.5% | N/A                                                   | 5.6%     | 2.1%   | 11.2% | 0.5388                                     | 9.6%    | 4.7%   | 16.6% | N/A                                                   |
| Northern Cape | Namakwa(DC6 )                    | 1    | 14.6%    | 7.6%   | 24.1% | N/A                                                   | 7.4%     | 2.8%   | 14.6% | 0.7848                                     | 10.5%   | 4.9%   | 18.1% | N/A                                                   |
| Eastern Cape  | Nelson Mandela Bay(NMA )         | 1    | 11.2%    | 5.6%   | 18.9% | N/A                                                   | 5.5%     | 2.0%   | 11.2% | 0.5236                                     | 25.3%   | 15.5%  | 37.0% | N/A                                                   |
| North West    | Ngaka Modiri Molema(DC38 )       | 1    | 11.1%    | 5.8%   | 18.2% | N/A                                                   | 5.7%     | 2.2%   | 11.0% | 0.5684                                     | 18.1%   | 10.6%  | 27.3% | N/A                                                   |
| Mpumalanga    | Nkangala(DC31 )                  | 1    | 13.3%    | 7.3%   | 21.1% | N/A                                                   | 11.7%    | 5.7%   | 20.0% | 0.9902                                     | 15.4%   | 8.6%   | 23.7% | N/A                                                   |
| Eastern Cape  | O.R.Tambo(DC15 )                 | 1    | 19.5%    | 12.6%  | 27.8% | N/A                                                   | 3.5%     | 1.3%   | 7.0%  | 0.1417                                     | 24.4%   | 16.5%  | 33.4% | N/A                                                   |
| Western Cape  | Overberg(DC3 )                   | 1    | 11.5%    | 5.8%   | 19.4% | N/A                                                   | 5.4%     | 1.9%   | 10.9% | 0.4959                                     | 17.7%   | 9.9%   | 27.8% | N/A                                                   |
| Northern Cape | Pixley ka Seme(DC7 )             | 1    | 25.0%    | 13.7%  | 39.7% | N/A                                                   | 8.3%     | 2.3%   | 20.3% | 0.7481                                     | 26.1%   | 14.7%  | 40.7% | N/A                                                   |
| Gauteng       | Sedibeng(DC42 )                  | 1    | 16.5%    | 9.2%   | 26.2% | N/A                                                   | 15.8%    | 7.9%   | 26.3% | 0.9993                                     | 12.3%   | 6.4%   | 20.3% | N/A                                                   |
| KwaZulu-Natal | Sisonke(DC43 )                   | 1    | 18.4%    | 11.3%  | 26.9% | N/A                                                   | 8.1%     | 3.8%   | 14.5% | 0.894                                      | 20.6%   | 13.1%  | 29.4% | N/A                                                   |
| Northern Cape | Siyanda(DC8 )                    | 1    | 13.3%    | 7.2%   | 21.2% | N/A                                                   | 7.0%     | 2.7%   | 13.3% | 0.7479                                     | 9.1%    | 4.4%   | 15.6% | N/A                                                   |
| Free State    | Thabo Mofutsanyane(DC19 )        | 1    | 12.8%    | 6.2%   | 22.1% | N/A                                                   | 7.2%     | 2.0%   | 18.0% | 0.653                                      | 17.5%   | 9.1%   | 28.2% | N/A                                                   |
| KwaZulu-Natal | UMgungundlovu(DC22 )             | 1    | 8.5%     | 4.1%   | 14.5% | N/A                                                   | 4.5%     | 1.6%   | 9.1%  | 0.3328                                     | 20.5%   | 12.6%  | 30.2% | N/A                                                   |
| KwaZulu-Natal | Ugu(DC21 )                       | 1    | 8.1%     | 4.4%   | 13.1% | N/A                                                   | 2.9%     | 1.1%   | 5.8%  | 0.0602                                     | 19.1%   | 12.6%  | 26.7% | N/A                                                   |

|               |                                  |   |       |       |       |     |       |       |       |        |       |       |       |     |
|---------------|----------------------------------|---|-------|-------|-------|-----|-------|-------|-------|--------|-------|-------|-------|-----|
| KwaZulu-Natal | Umkhanyakude(DC27 )              | 1 | 11.2% | 5.6%  | 18.9% | N/A | 8.3%  | 3.5%  | 15.9% | 0.8631 | 13.8% | 7.2%  | 22.5% | N/A |
| KwaZulu-Natal | Umzinyathi(DC24 )                | 1 | 12.8% | 4.9%  | 26.1% | N/A | 5.5%  | 1.4%  | 14.4% | 0.4431 | 19.0% | 7.7%  | 36.5% | N/A |
| KwaZulu-Natal | Uthukela(DC23 )                  | 1 | 5.6%  | 3.0%  | 9.1%  | N/A | 4.2%  | 2.0%  | 7.5%  | 0.2652 | 10.7% | 6.7%  | 15.5% | N/A |
| KwaZulu-Natal | Uthungulu(DC28 )                 | 1 | 11.4% | 6.4%  | 17.8% | N/A | 3.2%  | 1.2%  | 6.6%  | 0.1071 | 19.0% | 12.0% | 27.4% | N/A |
| Limpopo       | Vhembe(DC34 )                    | 1 | 25.5% | 15.4% | 38.0% | N/A | 4.5%  | 1.5%  | 9.9%  | 0.3466 | 20.2% | 11.3% | 31.3% | N/A |
| Limpopo       | Waterberg(DC36 )                 | 1 | 12.0% | 6.3%  | 19.6% | N/A | 6.5%  | 2.7%  | 12.2% | 0.6979 | 12.1% | 6.4%  | 19.5% | N/A |
| Western Cape  | West Coast(DC1 )                 | 1 | 10.4% | 4.6%  | 18.7% | N/A | 8.5%  | 2.3%  | 21.0% | 0.7495 | 26.7% | 15.6% | 40.5% | N/A |
| Gauteng       | West Rand(DC48 )                 | 1 | 11.0% | 5.0%  | 19.9% | N/A | 8.9%  | 3.4%  | 18.0% | 0.8797 | 11.6% | 5.3%  | 20.5% | N/A |
| Free State    | Xhariep(DC16 )                   | 1 | 20.2% | 11.3% | 31.3% | N/A | 7.1%  | 2.0%  | 17.3% | 0.6479 | 10.2% | 4.8%  | 18.0% | N/A |
| KwaZulu-Natal | Zululand(DC26 )                  | 1 | 8.2%  | 4.0%  | 14.0% | N/A | 3.6%  | 1.3%  | 7.5%  | 0.1747 | 13.9% | 7.9%  | 21.8% | N/A |
| KwaZulu-Natal | eThekweni(ETH )                  | 1 | 8.1%  | 4.1%  | 13.7% | N/A | 3.5%  | 1.3%  | 7.2%  | 0.15   | 19.5% | 12.3% | 28.5% | N/A |
| KwaZulu-Natal | iLembe(DC29 )                    | 1 | 10.7% | 5.7%  | 17.4% | N/A | 5.1%  | 1.3%  | 13.2% | 0.4016 | 37.3% | 27.2% | 48.2% | N/A |
| Eastern Cape  | Alfred Nzo(DC44 )                | 2 | 16.2% | 8.8%  | 25.8% | N/A | 7.3%  | 1.9%  | 18.1% | 0.659  | 18.0% | 10.0% | 28.0% | N/A |
| KwaZulu-Natal | Amajuba(DC25 )                   | 2 | 7.6%  | 4.0%  | 12.5% | N/A | 6.6%  | 3.1%  | 11.6% | 0.7634 | 11.6% | 6.7%  | 17.7% | N/A |
| Eastern Cape  | Amathole(DC12 )                  | 2 | 15.6% | 5.8%  | 31.2% | N/A | 30.8% | 14.7% | 51.8% | 1      | 27.4% | 11.7% | 48.8% | N/A |
| North West    | Bojanala(DC37 )                  | 2 | 10.8% | 5.4%  | 18.4% | N/A | 9.0%  | 2.4%  | 22.1% | 0.7872 | 15.6% | 8.6%  | 24.9% | N/A |
| Eastern Cape  | Buffalo City(BUF )               | 2 | 16.2% | 6.0%  | 33.4% | N/A | 14.4% | 3.0%  | 40.0% | 0.8966 | 34.4% | 14.5% | 60.0% | N/A |
| Eastern Cape  | Cacadu(DC10 )                    | 2 | 17.3% | 9.9%  | 26.7% | N/A | 9.8%  | 2.7%  | 24.0% | 0.8257 | 9.8%  | 4.7%  | 16.9% | N/A |
| Western Cape  | Cape Winelands(DC2 )             | 2 | 10.7% | 5.5%  | 17.7% | N/A | 16.9% | 9.5%  | 26.4% | 0.9999 | 24.4% | 15.6% | 34.5% | N/A |
| Limpopo       | Capricorn(DC35 )                 | 2 | 17.8% | 10.2% | 27.3% | N/A | 8.5%  | 3.8%  | 15.5% | 0.8982 | 8.8%  | 4.1%  | 15.5% | N/A |
| Western Cape  | Central Karoo(DC5 )              | 2 | 11.2% | 5.7%  | 18.5% | N/A | 10.1% | 2.7%  | 24.5% | 0.842  | 17.2% | 6.6%  | 33.5% | N/A |
| Eastern Cape  | Chris Hani(DC13 )                | 2 | 10.9% | 5.7%  | 17.9% | N/A | 9.0%  | 2.4%  | 22.0% | 0.7881 | 24.0% | 15.3% | 34.0% | N/A |
| Western Cape  | City of Cape Town(CPT )          | 2 | 18.1% | 11.2% | 26.3% | N/A | 14.7% | 8.3%  | 22.7% | 0.9998 | 37.5% | 27.7% | 48.0% | N/A |
| Gauteng       | City of Johannesburg(JHB )       | 2 | 15.6% | 9.5%  | 23.2% | N/A | 9.9%  | 2.7%  | 24.2% | 0.8305 | 14.9% | 8.9%  | 22.3% | N/A |
| Gauteng       | City of Tshwane(TSH )            | 2 | 17.3% | 10.7% | 25.4% | N/A | 9.2%  | 2.5%  | 22.2% | 0.8056 | 19.5% | 12.3% | 28.0% | N/A |
| North West    | Dr Kenneth Kaunda(DC40 )         | 2 | 24.5% | 13.9% | 37.9% | N/A | 10.1% | 2.7%  | 24.2% | 0.8362 | 16.1% | 8.3%  | 26.7% | N/A |
| North West    | Dr Ruth Segomotsi Mompati(DC39 ) | 2 | 17.0% | 10.5% | 24.8% | N/A | 12.4% | 6.7%  | 19.7% | 0.9974 | 13.1% | 7.4%  | 20.2% | N/A |
| Western Cape  | Eden(DC4 )                       | 2 | 22.8% | 12.1% | 36.7% | N/A | 11.8% | 3.1%  | 29.0% | 0.8861 | 20.1% | 8.1%  | 38.6% | N/A |
| Mpumalanga    | Ehlanzeni(DC32 )                 | 2 | 10.6% | 5.8%  | 17.0% | N/A | 6.0%  | 2.6%  | 11.1% | 0.6463 | 13.3% | 7.6%  | 20.3% | N/A |
| Gauteng       | Ekurhuleni(EKU )                 | 2 | 10.8% | 5.5%  | 18.2% | N/A | 9.4%  | 2.5%  | 23.1% | 0.8025 | 21.1% | 12.8% | 31.3% | N/A |
| Free State    | Fezile Dabi(DC20 )               | 2 | 14.9% | 5.7%  | 29.8% | N/A | 9.4%  | 2.5%  | 23.3% | 0.8069 | 18.1% | 9.0%  | 30.2% | N/A |
| Northern Cape | Frances Baard(DC9 )              | 2 | 14.2% | 8.1%  | 21.9% | N/A | 4.7%  | 1.8%  | 9.3%  | 0.3905 | 10.3% | 5.5%  | 16.7% | N/A |
| Mpumalanga    | Gert Sibande(DC30 )              | 2 | 14.2% | 8.6%  | 21.0% | N/A | 8.6%  | 2.3%  | 21.1% | 0.769  | 21.4% | 14.3% | 29.5% | N/A |
| Limpopo       | Greater Sekhukhune(DC47 )        | 2 | 18.0% | 11.2% | 26.0% | N/A | 5.8%  | 2.5%  | 10.8% | 0.6066 | 9.4%  | 5.0%  | 15.1% | N/A |
| Eastern Cape  | Joe Gqabi(DC14 )                 | 2 | 10.5% | 5.3%  | 17.6% | N/A | 7.6%  | 2.0%  | 19.1% | 0.6798 | 20.0% | 12.1% | 29.7% | N/A |
| Northern Cape | John Taolo Gaetsewe(DC45 )       | 2 | 9.1%  | 4.0%  | 16.7% | N/A | 14.7% | 6.6%  | 25.7% | 0.9957 | 11.6% | 5.6%  | 20.3% | N/A |
| Free State    | Lejweleputswa(DC18 )             | 2 | 19.4% | 11.1% | 29.9% | N/A | 13.0% | 6.2%  | 22.4% | 0.9947 | 15.9% | 6.3%  | 31.0% | N/A |
| Free State    | Mangaung(MAN )                   | 2 | 15.6% | 7.4%  | 26.6% | N/A | 9.4%  | 2.4%  | 23.5% | 0.7897 | 19.7% | 7.8%  | 38.7% | N/A |
| Limpopo       | Mopani(DC33 )                    | 2 | 12.2% | 6.3%  | 19.9% | N/A | 6.8%  | 2.7%  | 13.0% | 0.7201 | 20.5% | 12.2% | 30.6% | N/A |
| Northern Cape | Namakwa(DC6 )                    | 2 | 14.7% | 5.7%  | 29.1% | N/A | 10.7% | 3.0%  | 26.0% | 0.8658 | 15.5% | 5.9%  | 30.8% | N/A |
| Eastern Cape  | Nelson Mandela Bay(NMA )         | 2 | 11.4% | 6.0%  | 18.3% | N/A | 6.0%  | 2.4%  | 11.6% | 0.6202 | 17.6% | 10.5% | 26.6% | N/A |
| North West    | Ngaka Modiri Molema(DC38 )       | 2 | 19.0% | 11.9% | 27.9% | N/A | 11.7% | 6.0%  | 19.3% | 0.9936 | 9.6%  | 4.9%  | 15.9% | N/A |
| Mpumalanga    | Nkangala(DC31 )                  | 2 | 9.7%  | 4.8%  | 16.3% | N/A | 9.3%  | 2.6%  | 22.1% | 0.8075 | 17.3% | 7.1%  | 33.3% | N/A |
| Eastern Cape  | O.R.Tambo(DC15 )                 | 2 | 24.8% | 16.8% | 33.8% | N/A | 4.4%  | 1.7%  | 8.6%  | 0.3192 | 31.4% | 22.3% | 41.3% | N/A |
| Western Cape  | Overberg(DC3 )                   | 2 | 14.1% | 5.2%  | 28.3% | N/A | 8.8%  | 3.7%  | 16.3% | 0.9011 | 25.0% | 15.7% | 35.8% | N/A |
| Northern Cape | Pixley ka Seme(DC7 )             | 2 | 15.3% | 5.9%  | 30.5% | N/A | 10.1% | 2.7%  | 24.1% | 0.8434 | 19.0% | 7.6%  | 35.7% | N/A |
| Gauteng       | Sedibeng(DC42 )                  | 2 | 14.7% | 8.4%  | 22.9% | N/A | 9.6%  | 4.5%  | 16.9% | 0.9546 | 14.6% | 8.3%  | 22.5% | N/A |
| KwaZulu-Natal | Sisonke(DC43 )                   | 2 | 20.0% | 12.9% | 28.6% | N/A | 7.5%  | 1.9%  | 18.9% | 0.6726 | 50.2% | 39.8% | 60.8% | N/A |

|               |                                  |   |       |       |       |     |       |       |       |        |       |       |       |     |
|---------------|----------------------------------|---|-------|-------|-------|-----|-------|-------|-------|--------|-------|-------|-------|-----|
| Northern Cape | Siyanda(DC8 )                    | 2 | 10.5% | 5.2%  | 17.5% | N/A | 26.1% | 16.1% | 38.3% | 1      | 8.6%  | 4.1%  | 15.0% | N/A |
| Free State    | Thabo Mofutsanyane(DC19 )        | 2 | 16.1% | 8.2%  | 27.1% | N/A | 13.7% | 6.0%  | 25.5% | 0.9908 | 27.0% | 15.7% | 41.1% | N/A |
| KwaZulu-Natal | UMgungundlovu(DC22 )             | 2 | 19.4% | 12.3% | 28.3% | N/A | 6.8%  | 1.8%  | 17.3% | 0.6059 | 16.6% | 9.9%  | 24.6% | N/A |
| KwaZulu-Natal | Ugu(DC21 )                       | 2 | 17.2% | 11.3% | 23.9% | N/A | 5.0%  | 2.3%  | 8.8%  | 0.4501 | 36.3% | 28.2% | 44.7% | N/A |
| KwaZulu-Natal | Umkhanyakude(DC27 )              | 2 | 18.3% | 9.6%  | 29.7% | N/A | 7.1%  | 1.7%  | 18.6% | 0.6238 | 30.8% | 18.6% | 44.7% | N/A |
| KwaZulu-Natal | Umzinyathi(DC24 )                | 2 | 14.5% | 5.5%  | 29.2% | N/A | 6.6%  | 1.7%  | 17.0% | 0.5943 | 22.6% | 9.3%  | 42.2% | N/A |
| KwaZulu-Natal | Uthukela(DC23 )                  | 2 | 11.1% | 7.3%  | 15.6% | N/A | 3.0%  | 1.3%  | 5.5%  | 0.0477 | 25.4% | 19.6% | 31.7% | N/A |
| KwaZulu-Natal | Uthungulu(DC28 )                 | 2 | 16.0% | 9.5%  | 24.2% | N/A | 6.0%  | 2.5%  | 11.2% | 0.6329 | 28.7% | 19.9% | 38.6% | N/A |
| Limpopo       | Vhembe(DC34 )                    | 2 | 31.6% | 20.1% | 44.8% | N/A | 7.2%  | 1.8%  | 19.1% | 0.6245 | 30.0% | 18.9% | 43.1% | N/A |
| Limpopo       | Waterberg(DC36 )                 | 2 | 18.2% | 11.1% | 26.6% | N/A | 7.1%  | 3.1%  | 12.8% | 0.7899 | 14.8% | 8.6%  | 22.5% | N/A |
| Western Cape  | West Coast(DC1 )                 | 2 | 13.8% | 5.0%  | 28.6% | N/A | 10.3% | 2.6%  | 25.9% | 0.8387 | 20.7% | 8.2%  | 39.2% | N/A |
| Gauteng       | West Rand(DC48 )                 | 2 | 11.1% | 5.4%  | 19.3% | N/A | 7.1%  | 2.7%  | 14.2% | 0.7375 | 22.4% | 13.0% | 33.8% | N/A |
| Free State    | Xhariep(DC16 )                   | 2 | 15.7% | 6.0%  | 31.4% | N/A | 8.7%  | 2.4%  | 21.7% | 0.7647 | 24.7% | 14.4% | 37.2% | N/A |
| KwaZulu-Natal | Zululand(DC26 )                  | 2 | 11.4% | 6.0%  | 18.4% | N/A | 6.1%  | 2.5%  | 11.9% | 0.6421 | 12.7% | 6.8%  | 20.2% | N/A |
| KwaZulu-Natal | eThekweni(ETH )                  | 2 | 15.5% | 9.6%  | 22.6% | N/A | 4.9%  | 2.1%  | 9.2%  | 0.4327 | 32.5% | 23.8% | 42.1% | N/A |
| KwaZulu-Natal | iLembe(DC29 )                    | 2 | 8.9%  | 4.4%  | 14.9% | N/A | 5.2%  | 2.1%  | 10.3% | 0.4818 | 29.4% | 20.1% | 39.7% | N/A |
| Eastern Cape  | Alfred Nzo(DC44 )                | 3 | 17.0% | 9.7%  | 26.5% | N/A | 6.2%  | 2.5%  | 12.3% | 0.6337 | 25.0% | 15.7% | 36.2% | N/A |
| KwaZulu-Natal | Amajuba(DC25 )                   | 3 | 12.2% | 6.8%  | 19.4% | N/A | 4.5%  | 1.8%  | 8.8%  | 0.341  | 14.3% | 8.3%  | 21.9% | N/A |
| Eastern Cape  | Amathole(DC12 )                  | 3 | 12.1% | 5.4%  | 22.2% | N/A | 10.1% | 3.5%  | 20.9% | 0.901  | 17.1% | 7.8%  | 29.7% | N/A |
| North West    | Bojanala(DC37 )                  | 3 | 8.6%  | 4.1%  | 14.7% | N/A | 5.7%  | 2.2%  | 11.1% | 0.5831 | 10.3% | 5.2%  | 17.2% | N/A |
| Eastern Cape  | Buffalo City(BUF )               | 3 | 14.3% | 5.2%  | 30.4% | N/A | 11.2% | 2.2%  | 33.1% | 0.7951 | 39.0% | 20.0% | 61.1% | N/A |
| Eastern Cape  | Cacadu(DC10 )                    | 3 | 9.8%  | 4.7%  | 16.9% | N/A | 6.6%  | 2.6%  | 13.0% | 0.7016 | 12.5% | 6.3%  | 20.5% | N/A |
| Western Cape  | Cape Winelands(DC2 )             | 3 | 9.0%  | 4.3%  | 15.7% | N/A | 5.0%  | 1.7%  | 10.3% | 0.4359 | 17.1% | 9.6%  | 26.4% | N/A |
| Limpopo       | Capricorn(DC35 )                 | 3 | 17.1% | 10.5% | 25.3% | N/A | 4.6%  | 1.8%  | 8.9%  | 0.3588 | 11.2% | 6.1%  | 17.9% | N/A |
| Western Cape  | Central Karoo(DC5 )              | 3 | 11.6% | 6.0%  | 19.0% | N/A | 4.9%  | 1.8%  | 10.0% | 0.4155 | 13.8% | 7.5%  | 22.1% | N/A |
| Eastern Cape  | Chris Hani(DC13 )                | 3 | 12.4% | 6.9%  | 19.6% | N/A | 8.9%  | 4.2%  | 15.6% | 0.9323 | 22.2% | 14.2% | 31.4% | N/A |
| Western Cape  | City of Cape Town(CPT )          | 3 | 10.1% | 5.7%  | 15.8% | N/A | 4.8%  | 2.0%  | 9.0%  | 0.403  | 23.3% | 16.2% | 31.5% | N/A |
| Gauteng       | City of Johannesburg(JHB )       | 3 | 14.7% | 8.9%  | 21.8% | N/A | 10.6% | 5.6%  | 17.3% | 0.9889 | 14.5% | 8.6%  | 21.6% | N/A |
| Gauteng       | City of Tshwane(TSH )            | 3 | 9.4%  | 5.2%  | 15.1% | N/A | 6.1%  | 2.8%  | 10.9% | 0.675  | 14.6% | 9.0%  | 21.8% | N/A |
| North West    | Dr Kenneth Kaunda(DC40 )         | 3 | 15.9% | 8.0%  | 26.5% | N/A | 7.6%  | 2.1%  | 19.0% | 0.6966 | 17.6% | 9.1%  | 29.4% | N/A |
| North West    | Dr Ruth Segomotsi Mompati(DC39 ) | 3 | 21.0% | 13.3% | 30.0% | N/A | 4.6%  | 1.7%  | 9.1%  | 0.3583 | 13.5% | 7.7%  | 21.1% | N/A |
| Western Cape  | Eden(DC4 )                       | 3 | 10.6% | 4.6%  | 19.4% | N/A | 20.0% | 9.4%  | 34.8% | 0.9997 | 13.5% | 6.2%  | 23.4% | N/A |
| Mpumalanga    | Ehlanzeni(DC32 )                 | 3 | 26.6% | 19.0% | 35.2% | N/A | 8.6%  | 4.5%  | 14.0% | 0.9527 | 23.1% | 16.1% | 31.0% | N/A |
| Gauteng       | Ekurhuleni(EKU )                 | 3 | 8.0%  | 3.9%  | 13.7% | N/A | 4.3%  | 1.6%  | 8.8%  | 0.3087 | 14.5% | 8.2%  | 22.6% | N/A |
| Free State    | Fezile Dabi(DC20 )               | 3 | 13.4% | 6.3%  | 23.9% | N/A | 7.1%  | 1.9%  | 17.8% | 0.6345 | 17.2% | 8.2%  | 29.2% | N/A |
| Northern Cape | Frances Baard(DC9 )              | 3 | 9.1%  | 4.7%  | 15.3% | N/A | 5.8%  | 2.4%  | 11.0% | 0.6016 | 10.2% | 5.4%  | 16.6% | N/A |
| Mpumalanga    | Gert Sibande(DC30 )              | 3 | 12.9% | 7.6%  | 19.4% | N/A | 13.3% | 7.5%  | 20.6% | 0.9999 | 22.2% | 14.9% | 30.6% | N/A |
| Limpopo       | Greater Sekhukhune(DC47 )        | 3 | 11.0% | 6.6%  | 16.6% | N/A | 4.1%  | 1.8%  | 7.6%  | 0.2448 | 14.2% | 8.9%  | 20.8% | N/A |
| Eastern Cape  | Joe Gqabi(DC14 )                 | 3 | 18.8% | 11.2% | 28.5% | N/A | 3.7%  | 1.3%  | 7.8%  | 0.2    | 29.1% | 19.5% | 40.1% | N/A |
| Northern Cape | John Taolo Gaetsewe(DC45 )       | 3 | 8.8%  | 4.1%  | 15.6% | N/A | 5.9%  | 2.1%  | 11.9% | 0.5754 | 14.4% | 7.6%  | 23.5% | N/A |
| Free State    | Lejweleputswa(DC18 )             | 3 | 14.8% | 7.9%  | 23.7% | N/A | 7.4%  | 3.1%  | 13.8% | 0.798  | 12.2% | 6.3%  | 20.1% | N/A |
| Free State    | Mangaung(MAN )                   | 3 | 17.6% | 9.3%  | 28.5% | N/A | 7.0%  | 1.7%  | 18.0% | 0.6214 | 15.6% | 7.8%  | 26.0% | N/A |
| Limpopo       | Mopani(DC33 )                    | 3 | 23.9% | 14.7% | 34.6% | N/A | 9.0%  | 3.9%  | 16.5% | 0.92   | 26.7% | 17.0% | 37.8% | N/A |
| Northern Cape | Namakwa(DC6 )                    | 3 | 13.3% | 6.6%  | 22.3% | N/A | 9.8%  | 4.1%  | 18.2% | 0.9336 | 11.6% | 5.5%  | 20.2% | N/A |
| Eastern Cape  | Nelson Mandela Bay(NMA )         | 3 | 16.1% | 9.1%  | 25.0% | N/A | 4.9%  | 1.7%  | 10.2% | 0.4129 | 20.3% | 11.8% | 30.9% | N/A |
| North West    | Ngaka Modiri Molema(DC38 )       | 3 | 16.0% | 9.8%  | 23.5% | N/A | 6.6%  | 2.9%  | 11.8% | 0.7373 | 24.9% | 16.9% | 33.9% | N/A |
| Mpumalanga    | Nkangala(DC31 )                  | 3 | 7.3%  | 3.3%  | 13.2% | N/A | 5.7%  | 2.1%  | 11.3% | 0.5696 | 16.9% | 9.5%  | 26.4% | N/A |
| Eastern Cape  | O.R.Tambo(DC15 )                 | 3 | 13.1% | 7.4%  | 20.3% | N/A | 3.2%  | 1.1%  | 6.5%  | 0.1062 | 30.8% | 21.9% | 40.7% | N/A |



|               |                                  |   |       |       |       |     |       |      |       |        |       |       |       |     |
|---------------|----------------------------------|---|-------|-------|-------|-----|-------|------|-------|--------|-------|-------|-------|-----|
| Western Cape  | Overberg(DC3 )                   | 3 | 8.8%  | 4.3%  | 15.0% | N/A | 7.3%  | 1.9% | 18.6% | 0.6533 | 33.8% | 23.3% | 45.2% | N/A |
| Northern Cape | Pixley ka Seme(DC7 )             | 3 | 13.4% | 5.0%  | 26.8% | N/A | 15.5% | 6.7% | 28.7% | 0.9958 | 15.2% | 7.3%  | 26.6% | N/A |
| Gauteng       | Sedibeng(DC42 )                  | 3 | 10.6% | 5.6%  | 17.2% | N/A | 5.9%  | 2.4% | 11.0% | 0.609  | 13.2% | 7.6%  | 20.7% | N/A |
| KwaZulu-Natal | Sisonke(DC43 )                   | 3 | 14.6% | 9.2%  | 21.3% | N/A | 9.3%  | 5.0% | 15.0% | 0.9734 | 29.5% | 21.7% | 38.0% | N/A |
| Northern Cape | Siyanda(DC8 )                    | 3 | 14.1% | 8.2%  | 21.8% | N/A | 13.7% | 7.5% | 21.7% | 0.9988 | 8.2%  | 4.1%  | 13.6% | N/A |
| Free State    | Thabo Mofutsanyane(DC19 )        | 3 | 17.3% | 9.2%  | 28.2% | N/A | 5.2%  | 1.7% | 11.3% | 0.4635 | 14.7% | 7.3%  | 24.4% | N/A |
| KwaZulu-Natal | UMgungundlovu(DC22 )             | 3 | 12.9% | 7.3%  | 20.2% | N/A | 7.7%  | 3.5% | 13.9% | 0.8559 | 21.6% | 13.8% | 30.9% | N/A |
| KwaZulu-Natal | Ugu(DC21 )                       | 3 | 17.6% | 11.8% | 24.3% | N/A | 5.3%  | 2.5% | 9.3%  | 0.5197 | 25.8% | 18.7% | 33.9% | N/A |
| KwaZulu-Natal | Umkhanyakude(DC27 )              | 3 | 10.4% | 5.6%  | 16.8% | N/A | 3.2%  | 1.1% | 6.7%  | 0.1092 | 19.0% | 11.9% | 27.3% | N/A |
| KwaZulu-Natal | Umkhanyathi(DC24 )               | 3 | 12.7% | 4.9%  | 25.5% | N/A | 5.0%  | 1.3% | 12.9% | 0.3875 | 21.1% | 8.4%  | 39.7% | N/A |
| KwaZulu-Natal | Uthukela(DC23 )                  | 3 | 13.7% | 9.5%  | 18.4% | N/A | 3.4%  | 1.7% | 5.9%  | 0.091  | 23.6% | 18.2% | 29.5% | N/A |
| KwaZulu-Natal | Uthungulu(DC28 )                 | 3 | 16.1% | 9.9%  | 23.6% | N/A | 3.3%  | 1.2% | 6.6%  | 0.1242 | 23.7% | 16.0% | 32.3% | N/A |
| Limpopo       | Vhembe(DC34 )                    | 3 | 7.5%  | 3.4%  | 13.7% | N/A | 3.4%  | 1.1% | 7.4%  | 0.1458 | 9.7%  | 4.7%  | 16.4% | N/A |
| Limpopo       | Waterberg(DC36 )                 | 3 | 12.5% | 7.3%  | 19.5% | N/A | 6.5%  | 1.8% | 15.9% | 0.5857 | 9.2%  | 4.9%  | 15.2% | N/A |
| Western Cape  | West Coast(DC1 )                 | 3 | 7.5%  | 3.3%  | 13.6% | N/A | 7.7%  | 3.1% | 14.6% | 0.8136 | 19.9% | 11.2% | 30.5% | N/A |
| Gauteng       | West Rand(DC48 )                 | 3 | 18.7% | 10.2% | 29.8% | N/A | 4.9%  | 1.6% | 10.4% | 0.3999 | 19.3% | 10.5% | 30.5% | N/A |
| Free State    | Xhariep(DC16 )                   | 3 | 9.7%  | 4.5%  | 17.1% | N/A | 4.8%  | 1.6% | 10.1% | 0.3945 | 12.3% | 6.0%  | 20.5% | N/A |
| KwaZulu-Natal | Zululand(DC26 )                  | 3 | 12.8% | 7.1%  | 20.0% | N/A | 3.6%  | 1.3% | 7.4%  | 0.1669 | 25.9% | 17.4% | 36.1% | N/A |
| KwaZulu-Natal | eThekweni(ETH )                  | 3 | 9.5%  | 5.7%  | 14.5% | N/A | 4.9%  | 2.3% | 8.6%  | 0.4256 | 26.5% | 19.6% | 33.9% | N/A |
| KwaZulu-Natal | iLembe(DC29 )                    | 3 | 16.1% | 9.0%  | 25.4% | N/A | 4.4%  | 1.5% | 9.4%  | 0.3189 | 22.0% | 13.0% | 32.6% | N/A |
| Eastern Cape  | Alfred Nzo(DC44 )                | 4 | 14.7% | 8.2%  | 23.1% | N/A | 2.8%  | 0.9% | 6.3%  | 0.0755 | 13.5% | 7.3%  | 21.5% | N/A |
| KwaZulu-Natal | Amajuba(DC25 )                   | 4 | 8.0%  | 4.5%  | 12.6% | N/A | 3.9%  | 1.0% | 10.1% | 0.2334 | 10.7% | 6.4%  | 16.0% | N/A |
| Eastern Cape  | Amathole(DC12 )                  | 4 | 9.3%  | 3.9%  | 17.8% | N/A | 6.9%  | 1.6% | 17.7% | 0.5961 | 22.2% | 11.3% | 36.2% | N/A |
| North West    | Bojanala(DC37 )                  | 4 | 8.9%  | 4.5%  | 15.0% | N/A | 4.9%  | 1.3% | 12.6% | 0.3855 | 8.9%  | 4.5%  | 14.9% | N/A |
| Eastern Cape  | Buffalo City(BUF )               | 4 | 10.0% | 3.9%  | 19.9% | N/A | 8.2%  | 1.6% | 25.1% | 0.6461 | 25.5% | 12.5% | 42.7% | N/A |
| Eastern Cape  | Cacadu(DC10 )                    | 4 | 9.0%  | 4.4%  | 15.7% | N/A | 4.2%  | 1.4% | 8.7%  | 0.2758 | 26.5% | 16.8% | 38.0% | N/A |
| Western Cape  | Cape Winelands(DC2 )             | 4 | 6.2%  | 3.0%  | 10.7% | N/A | 6.2%  | 1.6% | 15.6% | 0.5444 | 10.6% | 5.9%  | 16.5% | N/A |
| Limpopo       | Capricorn(DC35 )                 | 4 | 9.6%  | 5.1%  | 15.5% | N/A | 3.4%  | 1.3% | 6.9%  | 0.1341 | 11.8% | 6.7%  | 18.5% | N/A |
| Western Cape  | Central Karoo(DC5 )              | 4 | 8.6%  | 4.1%  | 15.1% | N/A | 4.6%  | 1.6% | 9.4%  | 0.3614 | 7.9%  | 3.6%  | 14.2% | N/A |
| Eastern Cape  | Chris Hani(DC13 )                | 4 | 9.1%  | 4.7%  | 14.9% | N/A | 3.8%  | 1.5% | 7.6%  | 0.1996 | 15.9% | 9.5%  | 23.7% | N/A |
| Western Cape  | City of Cape Town(CPT )          | 4 | 8.5%  | 3.0%  | 18.8% | N/A | 7.0%  | 3.3% | 12.2% | 0.8015 | 15.4% | 9.5%  | 22.5% | N/A |
| Gauteng       | City of Johannesburg(JHB )       | 4 | 6.6%  | 3.5%  | 10.7% | N/A | 8.4%  | 4.6% | 13.4% | 0.9533 | 8.0%  | 4.5%  | 12.6% | N/A |
| Gauteng       | City of Tshwane(TSH )            | 4 | 4.5%  | 2.1%  | 7.9%  | N/A | 3.7%  | 1.5% | 7.0%  | 0.1582 | 6.0%  | 3.1%  | 10.1% | N/A |
| North West    | Dr Kenneth Kaunda(DC40 )         | 4 | 6.9%  | 2.8%  | 13.1% | N/A | 5.4%  | 1.8% | 11.6% | 0.4939 | 8.0%  | 3.5%  | 15.0% | N/A |
| North West    | Dr Ruth Segomotsi Mompati(DC39 ) | 4 | 8.0%  | 4.2%  | 13.3% | N/A | 7.0%  | 3.3% | 12.2% | 0.8128 | 5.2%  | 2.5%  | 9.2%  | N/A |
| Western Cape  | Eden(DC4 )                       | 4 | 9.0%  | 3.3%  | 19.0% | N/A | 6.6%  | 1.6% | 17.3% | 0.5772 | 13.2% | 6.1%  | 23.0% | N/A |
| Mpumalanga    | Ehlanzeni(DC32 )                 | 4 | 6.6%  | 3.5%  | 10.8% | N/A | 3.4%  | 1.4% | 6.4%  | 0.1089 | 12.5% | 7.6%  | 18.3% | N/A |
| Gauteng       | Ekurhuleni(EKU )                 | 4 | 4.4%  | 2.0%  | 7.8%  | N/A | 6.5%  | 3.0% | 11.5% | 0.7371 | 9.3%  | 5.0%  | 15.0% | N/A |
| Free State    | Fezile Dabi(DC20 )               | 4 | 6.7%  | 2.8%  | 12.8% | N/A | 5.2%  | 1.3% | 13.4% | 0.4179 | 21.5% | 11.8% | 33.9% | N/A |
| Northern Cape | Frances Baard(DC9 )              | 4 | 10.9% | 6.1%  | 17.1% | N/A | 3.4%  | 1.3% | 7.0%  | 0.139  | 7.2%  | 3.6%  | 12.2% | N/A |
| Mpumalanga    | Gert Sibande(DC30 )              | 4 | 12.5% | 7.3%  | 19.1% | N/A | 4.7%  | 2.0% | 9.0%  | 0.3821 | 13.1% | 7.7%  | 19.9% | N/A |
| Limpopo       | Greater Sekhukhune(DC47 )        | 4 | 11.9% | 7.2%  | 17.6% | N/A | 5.4%  | 2.5% | 9.6%  | 0.5501 | 5.8%  | 3.0%  | 9.6%  | N/A |
| Eastern Cape  | Joe Gqabi(DC14 )                 | 4 | 16.4% | 9.4%  | 25.3% | N/A | 3.2%  | 1.1% | 6.9%  | 0.1167 | 13.4% | 7.3%  | 21.2% | N/A |
| Northern Cape | John Taolo Gaetsewe(DC45 )       | 4 | 9.7%  | 5.2%  | 16.0% | N/A | 8.4%  | 3.9% | 14.6% | 0.9098 | 6.5%  | 3.1%  | 11.4% | N/A |
| Free State    | Lejweleputswa(DC18 )             | 4 | 13.2% | 7.4%  | 20.8% | N/A | 5.4%  | 2.2% | 10.4% | 0.5142 | 9.4%  | 4.8%  | 15.4% | N/A |
| Free State    | Mangaung(MAN )                   | 4 | 8.5%  | 3.7%  | 15.8% | N/A | 5.4%  | 1.8% | 11.8% | 0.4869 | 15.0% | 7.7%  | 24.9% | N/A |
| Limpopo       | Mopani(DC33 )                    | 4 | 6.9%  | 3.3%  | 12.0% | N/A | 5.3%  | 2.1% | 10.3% | 0.5005 | 8.7%  | 4.4%  | 14.5% | N/A |
| Northern Cape | Namakwa(DC6 )                    | 4 | 7.6%  | 3.4%  | 13.9% | N/A | 7.1%  | 2.8% | 13.8% | 0.7477 | 8.7%  | 4.1%  | 15.4% | N/A |



|               |                            |   |       |      |       |        |      |      |       |        |       |       |       |        |
|---------------|----------------------------|---|-------|------|-------|--------|------|------|-------|--------|-------|-------|-------|--------|
| Free State    | Lejweleputswa(DC18 )       | 5 | 11.7% | 5.7% | 20.3% | 0.5537 | 4.1% | 1.3% | 9.0%  | 0.2609 | 10.2% | 4.8%  | 18.0% | 0.3243 |
| Free State    | Mangaung(MAN )             | 5 | 9.8%  | 4.1% | 18.4% | 0.8263 | 4.7% | 1.2% | 12.4% | 0.3582 | 16.1% | 7.5%  | 28.5% | 0.5143 |
| Limpopo       | Mopani(DC33 )              | 5 | 10.0% | 4.6% | 17.9% | 0.9661 | 5.2% | 1.8% | 11.2% | 0.4653 | 9.6%  | 4.4%  | 17.2% | 0.0022 |
| Northern Cape | Namakwa(DC6 )              | 5 | 8.2%  | 3.0% | 17.9% | 0.731  | 4.9% | 1.5% | 11.2% | 0.4009 | 8.6%  | 3.6%  | 16.5% | 0.2484 |
| Eastern Cape  | Nelson Mandela Bay(NMA )   | 5 | 8.9%  | 4.0% | 16.1% | 0.8491 | 3.2% | 0.9% | 7.5%  | 0.1316 | 17.2% | 9.0%  | 27.6% | 0.3095 |
| North West    | Ngaka Modiri Molema(DC38 ) | 5 | 7.0%  | 3.1% | 12.9% | 0.95   | 4.4% | 1.5% | 9.1%  | 0.3177 | 10.1% | 4.9%  | 17.1% | 0.0032 |
| Mpumalanga    | Nkangala(DC31 )            | 5 | 8.9%  | 4.0% | 16.6% | 0.2224 | 5.1% | 1.8% | 11.0% | 0.4396 | 11.1% | 5.3%  | 19.5% | 0.1345 |
| Eastern Cape  | O.R.Tambo(DC15 )           | 5 | 10.1% | 5.4% | 16.4% | 0.5924 | 2.3% | 0.7% | 5.1%  | 0.0279 | 17.9% | 11.0% | 26.1% | 0.0172 |
| Western Cape  | Overberg(DC3 )             | 5 | 9.0%  | 4.1% | 16.1% | 0.3381 | 4.9% | 1.2% | 12.9% | 0.3739 | 22.0% | 12.8% | 33.7% | 0.0586 |
| Northern Cape | Pixley ka Seme(DC7 )       | 5 | 9.7%  | 4.0% | 18.7% | 0.5992 | 5.2% | 1.4% | 13.3% | 0.4273 | 12.3% | 4.8%  | 24.8% | 0.311  |
| Gauteng       | Sedibeng(DC42 )            | 5 | 6.4%  | 2.6% | 12.1% | 0.7712 | 6.6% | 2.4% | 13.3% | 0.6657 | 10.0% | 4.6%  | 17.8% | 0.2336 |
| KwaZulu-Natal | Sisonke(DC43 )             | 5 | 7.7%  | 3.5% | 14.2% | 0.887  | 2.8% | 0.8% | 6.3%  | 0.0772 | 21.4% | 12.6% | 32.4% | 0.1028 |
| Northern Cape | Siyanda(DC8 )              | 5 | 11.7% | 5.9% | 19.6% | 0.5127 | 5.2% | 1.9% | 10.6% | 0.4716 | 6.3%  | 2.7%  | 11.8% | 0.2676 |
| Free State    | Thabo Mofutsanyane(DC19 )  | 5 | 9.0%  | 3.7% | 17.3% | 0.8498 | 4.4% | 1.2% | 11.4% | 0.3145 | 12.4% | 5.5%  | 22.6% | 0.3373 |
| KwaZulu-Natal | UMgungundlovu(DC22 )       | 5 | 6.6%  | 2.9% | 12.2% | 0.8795 | 3.8% | 1.3% | 8.2%  | 0.2098 | 17.5% | 9.8%  | 27.3% | 0.2441 |
| KwaZulu-Natal | Ugu(DC21 )                 | 5 | 7.6%  | 3.8% | 12.9% | 0.9731 | 3.3% | 1.2% | 6.7%  | 0.1131 | 20.8% | 13.3% | 29.7% | 0.1827 |
| KwaZulu-Natal | Umkhanyakude(DC27 )        | 5 | 7.8%  | 3.6% | 14.2% | 0.6034 | 4.4% | 1.5% | 9.7%  | 0.3244 | 11.3% | 5.5%  | 19.3% | 0.0658 |
| KwaZulu-Natal | Umqazi(DC24 )              | 5 | 6.4%  | 2.9% | 11.5% | 0.8143 | 3.4% | 1.2% | 7.3%  | 0.1398 | 12.9% | 6.8%  | 20.7% | 0.1568 |
| KwaZulu-Natal | Uthukela(DC23 )            | 5 | 7.2%  | 3.5% | 12.5% | 0.9174 | 3.2% | 1.1% | 6.8%  | 0.1074 | 11.4% | 6.2%  | 18.1% | 0.0034 |
| KwaZulu-Natal | Uthungulu(DC28 )           | 5 | 11.1% | 5.8% | 18.0% | 0.7098 | 3.0% | 1.0% | 6.5%  | 0.0927 | 18.6% | 11.3% | 27.6% | 0.1876 |
| Limpopo       | Vhembe(DC34 )              | 5 | 9.7%  | 4.5% | 17.3% | 0.1707 | 4.3% | 1.4% | 9.5%  | 0.3067 | 9.8%  | 4.6%  | 17.2% | 0.5039 |
| Limpopo       | Waterberg(DC36 )           | 5 | 6.0%  | 2.7% | 10.9% | 0.913  | 4.1% | 1.5% | 8.4%  | 0.2555 | 10.6% | 5.4%  | 17.8% | 0.634  |
| Western Cape  | West Coast(DC1 )           | 5 | 6.6%  | 2.6% | 13.2% | 0.4791 | 4.5% | 1.3% | 10.6% | 0.329  | 12.7% | 5.6%  | 23.0% | 0.1249 |
| Gauteng       | West Rand(DC48 )           | 5 | 6.3%  | 2.5% | 12.9% | 0.9742 | 3.7% | 1.1% | 8.6%  | 0.2027 | 11.4% | 5.0%  | 20.8% | 0.0971 |
| Free State    | Xharies(DC16 )             | 5 | 8.5%  | 3.6% | 16.2% | 0.4699 | 4.4% | 1.2% | 11.5% | 0.3171 | 10.6% | 4.8%  | 19.2% | 0.3661 |
| KwaZulu-Natal | Zululand(DC26 )            | 5 | 7.6%  | 3.6% | 13.5% | 0.7981 | 2.3% | 0.7% | 5.2%  | 0.033  | 15.9% | 8.9%  | 24.9% | 0.0506 |
| KwaZulu-Natal | eThekweni(ETH )            | 5 | 6.7%  | 3.2% | 11.5% | 0.6792 | 2.4% | 0.8% | 5.2%  | 0.0314 | 14.7% | 8.6%  | 22.4% | 0.0119 |
| KwaZulu-Natal | iLembe(DC29 )              | 5 | 7.0%  | 3.2% | 12.9% | 0.9372 | 3.2% | 0.8% | 8.7%  | 0.1436 | 18.0% | 10.3% | 27.9% | 0.2679 |

**Supplementary 10: post hoc power analysis**

We performed a post hoc power analysis to assess the minimum effect size detectable among infants which has the smallest number of observations. The post hoc power analysis suggests that the sample size in the smallest age group has the power to detect a small effect size ( $w \sim 0.1$  based on Cohens rules of thumb [Cohen, 1988]) when using a chi-square test with 2x9 cells (maximum number of cells tested in our analyses i.e. binary nutritional classification versus province of residence) with 80% power and 5% alpha or type I error.

$\chi^2$  tests - Goodness-of-fit tests: Contingency tables

**Analysis:** Post hoc: Compute achieved power

**Input:** Effect size  $w$  = 0.11  
 $\alpha$  err prob = 0.05  
 Total sample size = 1277  
 Df = 8

**Output:** Noncentrality parameter  $\lambda$  = 15.4517000  
 Critical  $\chi^2$  = 15.5073131  
 Power (1- $\beta$  err prob) = 0.8133607

Cohen, J (1988) Statistical power analysis for the behavioral sciences (2nd ed.). Hillsdale, NJ: Erlbaum.

A summary guideline for effect size determinations is also provided in Kotrlik, JW and Williams, HA (2003) The incorporation of effect size in information technology, learning, and performance research. *Information Technology, Learning, and Performance Journal* **21(1)** 1-7.

| Effect Size                              | Use                           | Small | Medium | Large |
|------------------------------------------|-------------------------------|-------|--------|-------|
| Correlation inc Phi                      |                               | 0.1   | 0.3    | 0.5   |
| <a href="#">Cramer's V</a>               | r x c frequency tables        | 0.1   | 0.3    | 0.5   |
| <a href="#">Difference in arcsines</a>   | Comparing two proportions     | 0.2   | 0.5    | 0.8   |
| $\eta^2$                                 | Anova                         | 0.01  | 0.06   | 0.14  |
| <a href="#">omega-squared</a>            | Anova; See Field (2013)       | 0.01  | 0.06   | 0.14  |
| <a href="#">Multivariate eta-squared</a> | one-way MANOVA                | 0.01  | 0.06   | 0.14  |
| Cohen's f                                | one-way an(c)ova (regression) | 0.1   | 0.25   | 0.4   |
| $\eta^2$                                 | Multiple regression           | 0.02  | 0.13   | 0.26  |
| $\kappa^2$                               | Mediation analysis            | 0.01  | 0.09   | 0.25  |
| Cohen's f                                | Multiple Regression           | 0.14  | 0.39   | 0.59  |
| Cohen's d                                | t-tests                       | 0.2   | 0.5    | 0.8   |
| Cohen's $\omega$                         | chi-square                    | 0.1   | 0.3    | 0.5   |
| Odds Ratios                              | 2 by 2 tables                 | 1.5   | 3.5    | 9     |
| Odds Ratios                              | <a href="#">p vs 0.5</a>      | 0.55  | 0.65   | 0.75  |
| <a href="#">Average Spearman rho</a>     | Friedman test                 | 0.1   | 0.3    | 0.5   |
